# Supplementary material for: Differential transcriptomic landscapes of multiple organs from SARS-CoV-2 early infected rhesus macaques
Source: Research Square preprint supplement (doi:10.21203/rs.3.rs-403788/v1), 2021-04-16
Supplement: Supplementary file 1 [file 2c3c28ff46327eb028f564e9.xlsx]

## Sheet: Supplementary Table 1
Supplementary Table 1. Distribution and expression of SARS-CoV-2 in rhesus macaque.
Rhesus macaque	Cell type	SARS-CoV-2
		Expression	Replication
Lung	Epithelial cell	+	+
Heart	Myocadiac cell	+	+
Kidney
Proximal tubule	Epithelial cell	+	+
Distal convoluted tubule	Epithelial cell	+	+
Collecting tubule	Epithelial cell	+	+
Liver	Hepatocyte	+	+
Stomach	Epithelial cell	+	+
Jejunum	Epithelial cell	+	+
Colon	Epithelial cell	+	+
Testis	Sertoli cell	+	+
Muscle	Strait muscle cell	+	+
Microvessels	Endothelial cell	+	+
Cerebral cortex	Neuron	+	+
Cerebellum	Purkinje cell	+	+
Brainstem	Glial cell	+	+
	Neuron	+	+
	Nerve fiber	+	+

## Sheet: Supplementary Table 2
Supplementary Table 2. Expression profiling of tissues marker genes for multiple organs in rhesus macaque.
TissuesMarkers	GeneID	GeneName	Brain	Brainstem	Cerebellum	Medulla	Left ventricle	Right ventricle	Muscle	Lung	Kidney	Spleen	Liver	Intestine	Stomach	Testis
Lung	ENSMMUG00000013029	SFTPC	2.23975	0.212111	0.558091	0.121171	0.632882	0.0779673	0.067348	3725.36	0.172863	0	0.189922	0.0768416	0	0
Lung	ENSMMUG00000017818	SFTPB	1.17918	1.70045	4.77239	4.20944	1.99387	0.33336	2.66359	956.778	2.12491	3.27362	0.507523	2.38196	0.70302	0.303709
Lung	ENSMMUG00000047229	SFTPA1	0.484137	0.0903499	0.166406	0.103227	0.0141884	0.0664213	0	712.081	0.0920401	0	0.17528	0	0	0
Lung	ENSMMUG00000013402	NAPSA	1.10361	1.71416	9.55771	1.3751	0.0343645	0.764148	0.72955	60.5174	29.7824	0.867334	0.228593	0.515289	0.678528	0.195419
Lung	ENSMMUG00000002787	SFTPD	0.29481	0	0	0	0.0244796	0	0	234.245	0	0	1.39576	0	0	0.0696035
Lung	ENSMMUG00000010555	LAMP3	0	0.0549682	0.0867771	0.0628029	0.00863213	0.0101026	0.00872657	13.5241	0.0223986	1.29165	0	0.11948	0.0319578	0
Lung	ENSMMUG00000057864	SFTA2	0	0	0.0233449	0.0506859	0	0.0326136	0.0140858	2.35087	0.0361542	0.0251191	0	0.0482141	0.670591	0.0198085
Lung	ENSMMUG00000047114	CCL18	0	0	0	0	0.178692	0.278842	0.0602157	20.4286	0.154557	0.0357941	0.264147	9.93917	0.171514	0
Lung	ENSMMUG00000002610	MARCO	0	0.396199	0.0987586	0.107211	0	0.0229949	0	1.68713	0	0.24795	9.95176	0	0	0
Lung	ENSMMUG00000058486	C1QB	2.30278	7.71762	1.20497	9.17751	6.19871	1.37611	1.20022	23.5085	4.0285	121.958	30.5376	13.9837	9.95998	0.973753
Lung	ENSMMUG00000012535	MCEMP1	0.0640561	0.0677403	0.32082	0	0.319135	0	0	9.03832	0	1.15068	0.30327	0.515347	0.0787666	0
Lung	ENSMMUG00000002296	MSR1	0.0439094	0.99061	0.244352	0.23874	1.1959	0.375506	0.176924	2.98796	1.49479	8.9131	6.44449	1.76631	1.29584	0.0414674
Lung	ENSMMUG00000020987	FABP4	1.09168	0	0	0	105.623	101.973	22.3235	38.673	1.97579	35.495	21.0875	73.0232	7.38314	0
Lung	ENSMMUG00000002974	ACP5	0.1083	0.435208	0.180804	0	0.992794	0.252589	0.261823	5.10454	15.0646	60.8536	57.6524	18.5213	4.79415	0.214781
Lung	ENSMMUG00000011620	MRC1	0.307803	3.639	0.61928	0.371901	5.55997	2.05244	1.9796	19.1448	4.1322	35.4864	23.3987	10.0959	4.65835	0.301865
Lung	ENSMMUG00000003515	SLC6A4	0	1.69059	0.0988481	1.89578	0.88496	1.1738	0.298214	33.3584	1.30123	0.106361	0.29901	62.4701	0.0728065	0.195707
Lung	ENSMMUG00000023326	EPAS1	6.49616	21.8961	8.28402	13.4225	65.3724	46.4527	11.6381	558.23	40.54	80.5076	54.2383	35.4096	27.0864	1.48376
Lung	ENSMMUG00000018322	FCN3	0.374568	2.86081	1.73704	1.08617	8.01198	4.83399	1.04809	44.3179	5.2404	21.7707	2.30144	0.516599	1.19753	0.0471649
Lung	ENSMMUG00000019897	VIPR1	1.23745	2.19194	20.5039	0.280338	0.893941	0.198421	0.638837	53.5653	0.639888	4.47358	15.4961	32.64	4.0133	0
Lung	ENSMMUG00000019018	SMAD6	0.379782	4.10894	0.634038	1.69429	7.85958	4.32666	0.971125	41.7034	2.56813	1.88924	4.48132	2.78683	4.02339	0.744911
Lung	ENSMMUG00000022893	VWF	0.573049	8.4024	1.63927	5.30956	40.8842	25.8334	8.72031	85.0277	2.0851	19.1364	2.68563	5.28744	3.51929	2.49459
Kidney	ENSMMUG00000006935	UMOD	1.09486	0	0	0	0	0.275383	0.173	0.0644491	2490.72	0.0385638	0.0406552	0.0246734	0.0263979	0.0304108
Kidney	ENSMMUG00000003144	KCNJ1	0.0882736	0.0622338	0.130996	0.071104	0.293193	0.228758	0.0988003	0.103059	74.7209	0.105714	0.0650108	0.0563637	0.144728	0.0277881
Kidney	ENSMMUG00000003700	KNG1	0.108031	0.274187	0.0721421	0	0.0645868	0.0503926	0	0.194594	112.425	0.271687	484.114	0.59598	0.106272	0.153034
Kidney	ENSMMUG00000050889	FXYD4	0	0.170605	1.61598	0.292382	0.321499	0.564397	0.162508	1.21081	122.839	1.449	0.152758	1.48333	0.595126	0
Kidney	ENSMMUG00000038256	AQP2	0.102421	0.0309462	0.024427	0.0530354	0	0.0511881	0.00736937	0.252574	102.302	0	0.0138545	0.0168164	0	0.0103634
Kidney	ENSMMUG00000053229	DEFB1	1.05213	1.11264	0	0	134.191	56.6851	5.08721	4.10622	193.957	0.378	6.17675	10.6413	13.455	0
Kidney	ENSMMUG00000006664	CALB1	1.09108	1.09975	33.9546	3.98578	1.44391	1.90857	1.9749	0.665352	365.586	0.826865	0.661853	1.11685	0.859497	0.0241501
Kidney	ENSMMUG00000016727	CDH16	0.113138	0.00997043	0.0472203	0.0170873	0.122128	0.164921	0.113967	0.665158	79.3461	0	0.00892743	0.140868	0.0579668	0.0267115
Kidney	ENSMMUG00000008793	SPP1	5.01707	57.8333	23.8119	53.163	2.24099	2.0399	1.5297	2.04865	106.855	1.62293	2.18419	6.91505	1.13457	0.462912
Kidney	ENSMMUG00000014124	FOXI1	0	0	0	0	0	0	0	0.381404	6.85106	0	0.0343706	0.250311	0	0
Kidney	ENSMMUG00000017762	CLNK	0	0.0321896	0.118573	0	0.01011	0.0118322	0.0919858	0.670132	3.69892	2.86154	0.105682	0.524762	0.411722	0
Kidney	ENSMMUG00000014844	DMRT2	0.0558796	0	0	0	0	0	0.464383	0	4.73164	0.0125475	0	0	0	0.0890525
Stomach	ENSMMUG00000048466	PGC	2.36243	0.108035	0.170552	0.0925749	0.0381727	0	0.0514538	127.739	0.198101	0.458786	0.0241834	0.146767	7027.32	2.82197
Stomach	ENSMMUG00000023148	LIPF	4.86346	0	0	0.128677	0	0	0	0	0.780173	0.510161	0	0.0816011	24402.5	9.40387
Stomach	ENSMMUG00000008857	CHIA	0	0	0	0	0	0	0	0	0	0	0	0	2.35018	0
Stomach	ENSMMUG00000037611	PGA4	6.35766	0.0689572	0.489875	0.0590892	0.0649736	0.0380207	0.0656844	0	0.379335	1.28848	0.0926154	0.299774	12238.2	4.29523
Stomach	ENSMMUG00000006938	PDILT	0	0.0525838	0.0830128	0	0	0.086979	0	0	5.17462	0.0446609	0.376664	3.37177	0	0
Stomach	ENSMMUG00000053087	KCNE2	0	1.1235	1.3795	0	0.352865	0.688289	0	0	0.76301	0.424097	0.335323	0.27134	260.259	0.167218
Stomach	ENSMMUG00000000604	PDIA2	3.33232	1.40959	7.51035	3.06282	4.57741	3.60844	0.21579	0.57166	0.0923117	0.171029	0.112691	1.14897	77.6493	0.134871
Liver	ENSMMUG00000002955	CLEC1B	0	0.0372079	0.0587393	0	0.0701169	0.0410305	0	0.580953	0.136454	0.379221	0.0999468	0.040438	0.346115	0
Liver	ENSMMUG00000055035	CLEC4G	0	0	0	0	0.294644	0.284864	0.16836	0.0964929	0	0.300235	4.4556	0.147764	0	0
Liver	ENSMMUG00000020404	OIT3	0	0.0562434	0.932298	0.144585	0.0529943	0.0620216	0.0803612	0	0.309396	5.30238	32.0289	6.08205	0.0326992	0
Liver	ENSMMUG00000014403	FCN2	0.00711037	0.0451159	0.0237412	0.193299	0.0141699	0	0	0.0106731	0.0367679	0.255455	11.2369	0.0081721	0.0612029	0.0201448
Liver	ENSMMUG00000018322	FCN3	0.374568	2.86081	1.73704	1.08617	8.01198	4.83399	1.04809	44.3179	5.2404	21.7707	2.30144	0.516599	1.19753	0.0471649
Liver	ENSMMUG00000021303	FGA	0.437613	0.0661118	0.0782769	0.623161	0.280317	0.0729038	0.031487	0.351903	0.0202046	1.40377	4351.53	0.161665	0	0.575634
Liver	ENSMMUG00000015120	APOH	0.32533	0.0764537	0	0.196539	0.0360186	0.252925	0	0.325562	1.77575	0.324672	2037.97	0.457	0.444492	0.102412
Liver	ENSMMUG00000004516	APOA2	3.73766	0.608097	0.239997	1.82377	0.716211	1.84407	0.144809	1.51051	0.185842	5.42299	9916.29	0.495666	0	0
Liver	ENSMMUG00000021354	CRHBP	0.475273	0.20376	0.0428896	0	0.153591	0.164775	0	0.0192815	5.46329	0.207671	0	0.103343	0.236927	0.564084
Brain	ENSMMUG00000022699	NEUROD6	1.0669	0.216973	0.376784	0.0743695	0	0.0239264	0	0.431168	0	0	0	0	0	0
Brain	ENSMMUG00000022485	PPP1R17	0.728298	0.723509	2.40719	0.466646	0.0146605	0.0514734	0	0.0220853	0.0285307	0	0	0.00845504	0.018092	0.0208423
Brain	ENSMMUG00000064586	FABP7	2.93138	6.22292	16.4941	3.65988	0.0216363	0.0253219	0	0	0	0.0780119	0.061682	0.124781	0.0534011	0.0307595
Brain	ENSMMUG00000007814	GPM6A	18.6988	18.3265	78.034	4.25336	0.508833	0.253408	0.032834	3.14768	0.75848	0.117105	0.144032	0.511986	0.280566	0.0461737
Brain	ENSMMUG00000000697	TAGLN3	3.52293	3.54564	10.8635	2.90336	0.0141261	0.0165324	0	0.0319204	0.12829	0.0381998	0.0201357	0.211818	0.0871624	0.0100413
Brain	ENSMMUG00000015312	DCX	0.544307	0.94976	0.454353	0.295945	0	0	0	0	0	0.0122221	0	0.0390989	0.0836634	0.0385526

## Sheet: Supplementary Table 3
Supplementary Table 3. Transcriptome K-means clustering results for multiple organs of rhesus macaque.
GeneName	GeneID	Brain	Brainstem	Cerebellum	Medulla	Left ventricle	Right ventricle	Muscle	Lung	Kidney	Spleen	Liver	Intestine	Stomach	Testis	Clusters	Related organs
-	ENSMMUG00000064799	0.259156	1.13442	1.02761	1.88506	-0.888687	-0.888687	0.267564	1.40863	-0.888687	-0.201375	-0.888687	-0.44894	-0.888687	-0.888687	1	Neuro system
-	ENSMMUG00000050812	0.191483	-0.177573	-0.109685	3.36274	-0.164792	-0.360212	-0.556506	-0.281044	0.128105	-0.21124	-0.561268	-0.0925053	-0.587433	-0.580069	1	Neuro system
-	ENSMMUG00000060427	-0.41754	-0.186458	1.86654	2.23184	-0.443356	-0.231234	-0.855593	0.057665	-0.572445	-0.199844	-0.671243	-0.827623	-0.825668	1.07496	1	Neuro system
Metazoa_SRP	ENSMMUG00000052401	1.16323	-0.342811	1.0816	2.60441	-0.610824	-0.610824	-0.610824	-0.610824	0.699704	-0.610824	-0.610824	-0.319544	-0.610824	-0.610824	1	Neuro system
Metazoa_SRP	ENSMMUG00000057396	1.45346	-0.175883	1.45694	2.38311	-0.612931	-0.612931	-0.612931	0.00742601	-0.612931	-0.612931	-0.221603	-0.612931	-0.612931	-0.612931	1	Neuro system
-	ENSMMUG00000053368	-0.636044	-0.299886	0.219324	1.88937	-0.00561082	-0.41925	-0.199361	2.52072	-0.378275	0.113591	-1.00208	-0.415577	-0.801815	-0.585109	1	Neuro system
-	ENSMMUG00000054073	-0.435571	-0.435571	-0.435571	2.57781	-0.435571	-0.435571	-0.435571	2.06022	-0.435571	-0.435571	-0.435571	-0.435571	-0.435571	0.153257	1	Neuro system
Metazoa_SRP	ENSMMUG00000064143	-0.816857	0.912646	0.379316	1.65552	-0.640086	-0.11623	-0.633256	0.616568	-0.917258	2.11208	-0.840625	-0.54429	-1.04426	-0.12326	1	Neuro system
Metazoa_SRP	ENSMMUG00000051554	-0.861232	0.995762	0.410978	1.83494	-0.656407	-0.844123	-0.341884	0.426812	-0.165547	1.99518	-0.281724	-0.964196	-0.584365	-0.964196	1	Neuro system
-	ENSMMUG00000054974	-0.671102	-0.531687	1.28857	2.67911	-0.433914	-0.491532	-0.333633	-0.41318	1.20881	-0.180015	-0.45282	-0.32072	-0.614764	-0.73313	1	Neuro system
Metazoa_SRP	ENSMMUG00000050628	3.24388	-0.210074	0.449753	0.532405	-0.515924	-0.515924	-0.224589	-0.515924	-0.515924	0.00361094	-0.515924	-0.183522	-0.515924	-0.515924	1	Neuro system
Metazoa_SRP	ENSMMUG00000054679	0.205755	-0.282526	1.03386	3.17791	-0.413501	-0.413501	-0.413501	-0.413501	-0.413501	-0.413501	-0.413501	-0.413501	-0.413501	-0.413501	1	Neuro system
FMN2	ENSMMUG00000059650	0.571348	0.483098	1.15438	2.91254	-0.522188	-0.520344	-0.523937	-0.507355	-0.512836	-0.484119	-0.525156	-0.492239	-0.509752	-0.52345	1	Neuro system
Metazoa_SRP	ENSMMUG00000061518	-0.129892	0.44459	1.271	3.0043	-0.479378	-0.2756	-0.479378	-0.479378	-0.479378	-0.479378	-0.479378	-0.479378	-0.479378	-0.479378	1	Neuro system
U2	ENSMMUG00000034442	0.28947	-0.270749	-0.313051	3.21142	-0.295711	-0.294428	-0.644054	0.611448	0.0517543	0.0311443	-0.537038	-0.434501	-0.702853	-0.702853	1	Neuro system
Metazoa_SRP	ENSMMUG00000057171	0.298045	-0.515609	0.842767	3.17099	-0.515609	-0.041184	-0.515609	-0.515609	-0.515609	-0.515609	-0.130389	-0.515609	-0.0153535	-0.515609	1	Neuro system
GNG4	ENSMMUG00000053807	1.20822	1.38929	0.216246	2.54411	-0.645648	-0.618282	-0.598371	-0.645648	-0.190598	-0.645648	-0.645648	-0.402912	-0.385946	-0.579163	1	Neuro system
Metazoa_SRP	ENSMMUG00000051579	3.04837	-0.403656	0.00799112	1.38386	-0.403656	-0.403656	-0.403656	-0.403656	-0.403656	-0.403656	-0.403656	-0.403656	-0.403656	-0.403656	1	Neuro system
Metazoa_SRP	ENSMMUG00000058535	-0.120047	0.196195	0.727529	1.53421	-0.239257	-0.849208	-0.806394	2.24195	-0.939713	0.681415	-1.2771	-0.063282	-0.678452	-0.407843	1	Neuro system
Metazoa_SRP	ENSMMUG00000058848	0.817898	0.264585	2.38757	1.77303	-0.626346	-0.626346	-0.626346	-0.626346	-0.470758	0.238447	-0.626346	-0.626346	-0.626346	-0.626346	1	Neuro system
C1H1orf198	ENSMMUG00000005886	0.116314	1.37729	-0.600379	1.13223	0.735169	1.19463	-0.939923	1.45591	-0.0144094	-0.58299	-0.942508	-0.632684	-0.828541	-1.47011	1	Neuro system
Metazoa_SRP	ENSMMUG00000052224	-0.484653	-0.0173021	0.057268	2.99664	-0.25561	-0.73171	-0.66784	0.720473	-0.0497817	0.300009	-0.640785	0.489228	-0.833829	-0.882113	1	Neuro system
RGS4	ENSMMUG00000005185	3.40201	0.166147	-0.242887	-0.254584	-0.340959	-0.360815	-0.427359	-0.365552	-0.26709	-0.421704	-0.390772	0.212772	-0.272324	-0.436887	1	Neuro system
ILDR2	ENSMMUG00000023462	0.879946	1.16596	2.24992	1.2062	-0.64771	-0.768589	-0.835911	-0.356064	-0.0421345	-0.766042	-0.639228	-0.839838	-0.863133	0.256624	1	Neuro system
MAEL	ENSMMUG00000023463	-0.497407	0.164707	-0.288354	0.296903	0.687936	-0.424393	-0.497407	-0.497407	-0.254587	-0.497407	-0.497407	-0.425448	-0.497407	3.22768	1	Neuro system
Metazoa_SRP	ENSMMUG00000058464	3.4744	-0.267261	-0.267261	-0.267261	-0.267261	-0.267261	-0.267261	-0.267261	-0.267261	-0.267261	-0.267261	-0.267261	-0.267261	-0.267261	1	Neuro system
XCL1	ENSMMUG00000060218	2.06958	-0.402434	0.555442	0.822913	0.245208	0.804898	-0.963808	-0.622309	-0.767736	1.48826	-0.892001	-0.876649	-0.497557	-0.963808	1	Neuro system
-	ENSMMUG00000051559	-0.18465	0.0956738	0.55521	3.24115	-0.147106	-0.191457	-0.539193	-0.461138	0.272323	-0.272463	-0.548747	-0.471321	-0.649841	-0.69844	1	Neuro system
-	ENSMMUG00000058865	0.535119	-0.449038	0.20001	3.29692	-0.0880645	-0.376143	-0.496725	-0.0468794	-0.298421	-0.239116	-0.489997	-0.460129	-0.457826	-0.629705	1	Neuro system
-	ENSMMUG00000057372	0.266534	-0.322422	0.58801	3.28895	-0.213975	-0.442664	-0.331446	-0.512552	-0.0477047	-0.404897	-0.399058	-0.443674	-0.512552	-0.512552	1	Neuro system
-	ENSMMUG00000052789	0.2259	-0.293574	-0.255213	3.37567	-0.345753	-0.365167	-0.377151	-0.291359	0.327159	-0.317618	-0.422535	-0.354049	-0.453154	-0.453154	1	Neuro system
BRINP2	ENSMMUG00000022935	0.994205	1.75849	0.941911	1.17771	-0.459764	1.43653	-0.816524	-0.809974	-0.804162	-0.674987	-0.792202	-0.494452	-0.805418	-0.651358	1	Neuro system
U5	ENSMMUG00000036230	-0.380091	-0.380091	-0.380091	1.62304	-0.380091	-0.380091	-0.380091	2.93804	-0.380091	-0.380091	-0.380091	-0.380091	-0.380091	-0.380091	1	Neuro system
FAM163A	ENSMMUG00000055256	-0.232737	3.3116	-0.370018	0.456212	-0.271039	-0.495221	-0.495221	-0.382648	-0.349795	-0.158425	-0.495221	0.366717	-0.495221	-0.388984	1	Neuro system
Metazoa_SRP	ENSMMUG00000062633	0.914272	-0.578651	0.413932	1.88758	0.907983	-0.844329	-0.844329	1.79545	-0.194773	-0.844329	-0.368558	-0.555587	-0.844329	-0.844329	1	Neuro system
-	ENSMMUG00000054762	-0.709491	-0.575093	0.0204402	3.22748	-0.14467	-0.0739888	-0.220901	-0.214198	0.654829	0.0991381	-0.566335	-0.249957	-0.505112	-0.742142	1	Neuro system
ZNF648	ENSMMUG00000059328	-0.358897	2.4962	-0.230293	1.18976	-0.550995	-0.550995	-0.550995	-0.550995	-0.550995	-0.550995	-0.550995	-0.550995	-0.314782	1.62597	1	Neuro system
Metazoa_SRP	ENSMMUG00000051399	-1.45154	0.793355	1.20643	1.43393	-0.041398	-1.03895	-1.27334	0.67277	-0.76547	0.455115	-1.11653	-0.434962	0.506191	1.05439	1	Neuro system
-	ENSMMUG00000065201	0.965468	-0.435671	0.322167	3.10476	-0.523464	-0.4982	-0.671771	-0.224934	-0.286943	-0.137032	-0.460369	0.0980207	-0.580261	-0.671771	1	Neuro system
U6	ENSMMUG00000058965	2.30771	-0.519527	-0.519527	2.04247	-0.0500057	-0.519527	-0.519527	0.895097	-0.519527	-0.519527	-0.519527	-0.519527	-0.519527	-0.519527	1	Neuro system
LHX9	ENSMMUG00000012259	-0.286871	0.347783	-0.434893	0.369915	-0.434893	-0.262276	-0.434893	-0.434893	-0.434893	-0.168993	-0.294733	-0.434893	-0.434893	3.33943	1	Neuro system
Metazoa_SRP	ENSMMUG00000062588	-0.660218	0.300956	1.36115	2.36592	-0.884394	-0.884394	-0.432757	-0.211387	-0.594588	-0.884394	1.02604	-0.111442	0.493901	-0.884394	1	Neuro system
Metazoa_SRP	ENSMMUG00000052463	1.80076	0.101129	-0.00244718	2.74045	-0.430751	-0.457894	-0.471019	-0.554256	-0.394021	-0.257383	-0.554256	-0.4118	-0.554256	-0.554256	1	Neuro system
KIF21B	ENSMMUG00000005921	0.323385	1.15923	0.743795	1.73552	-0.790963	-0.800041	-0.823576	-0.0353924	-0.795663	1.90626	-0.687779	-0.46217	-0.695761	-0.776848	1	Neuro system
Metazoa_SRP	ENSMMUG00000057582	-0.354414	-0.0831874	-0.337577	3.27772	-0.404443	-0.445508	-0.503436	0.093076	-0.310786	0.745816	-0.4564	-0.27507	-0.442354	-0.503436	1	Neuro system
ASCL5	ENSMMUG00000017419	0.940019	1.86834	0.15954	2.01523	-0.819767	-0.819767	0.165054	0.354257	-0.819767	-0.819767	-0.819767	-0.595038	-0.819767	0.0111913	1	Neuro system
PHLDA3	ENSMMUG00000061689	-0.949868	0.842586	-0.95699	2.02847	-0.181643	-0.772211	0.401519	1.98132	-0.0482566	-0.121109	-0.813847	-0.152429	-0.356839	-0.900695	1	Neuro system
NAV1	ENSMMUG00000001908	-0.63563	2.11449	1.06062	1.5376	0.539145	-0.351635	-0.633595	0.415845	-0.853917	-0.0505071	-1.07691	-0.411658	-0.496318	-1.15752	1	Neuro system
SHISA4	ENSMMUG00000001921	0.225386	1.18268	1.0418	2.23842	0.183393	-0.251644	0.937977	-0.611761	-0.851323	-0.916328	-0.891639	-0.772305	-0.739512	-0.77514	1	Neuro system
GPR37L1	ENSMMUG00000013788	0.0845966	1.63303	2.20385	1.56713	-0.550185	-0.553414	-0.555402	-0.551282	-0.541394	-0.551522	-0.556203	-0.526732	-0.547687	-0.554788	1	Neuro system
ARL8A	ENSMMUG00000031357	-0.126174	1.2579	1.25666	2.23817	-0.231794	-0.648709	-0.580508	0.695635	-0.319857	-0.041742	-1.13326	-0.498845	-0.672212	-1.19527	1	Neuro system
-	ENSMMUG00000058821	-0.585662	1.62274	0.712934	2.14803	-0.493012	-0.631278	-0.630728	0.15402	-0.747513	1.12341	-0.834403	-0.256586	-0.836259	-0.745695	1	Neuro system
Metazoa_SRP	ENSMMUG00000060692	-1.2484	-0.771188	0.25832	2.02296	0.550167	-1.2484	-0.339277	1.46105	-0.081671	1.18345	-0.393821	-0.729761	-0.693511	0.0300781	1	Neuro system
ADORA1	ENSMMUG00000008714	-0.0821276	1.5694	1.91614	1.94315	-0.527266	-0.595234	-0.593432	-0.641198	-0.524896	-0.161322	-0.630616	-0.673901	-0.631945	-0.366749	1	Neuro system
PLEKHA6	ENSMMUG00000017114	-0.1528	1.14204	1.49525	1.68698	-0.760415	-0.893467	-1.08854	-0.82024	0.478802	-0.995167	-0.253982	0.237745	0.965127	-1.04134	1	Neuro system
CNTN2	ENSMMUG00000018797	-0.300246	2.08703	1.69578	1.72279	-0.500476	-0.510511	-0.528156	-0.527662	-0.525803	-0.52629	-0.528406	-0.509861	-0.521296	-0.526897	1	Neuro system
-	ENSMMUG00000050259	0.273461	-0.0737728	-0.361592	3.4201	-0.361592	-0.361592	-0.361592	-0.225413	-0.244311	-0.361592	-0.361592	-0.257324	-0.361592	-0.361592	1	Neuro system
TMCC2	ENSMMUG00000010480	0.203076	1.37099	2.11883	1.86174	-0.55185	-0.53525	-0.442986	-0.467975	-0.602806	-0.532527	-0.647886	-0.584407	-0.628139	-0.560819	1	Neuro system
Metazoa_SRP	ENSMMUG00000049995	0.438445	0.490808	-0.47199	3.2406	0.208394	-0.47199	-0.47199	-0.130335	-0.47199	-0.47199	-0.47199	-0.47199	-0.47199	-0.47199	1	Neuro system
CDK18	ENSMMUG00000004109	-0.444673	1.33378	0.990272	2.37213	0.512686	-0.226483	-0.923882	-0.788703	-0.334581	-0.834617	-0.325199	0.419996	-0.838576	-0.912149	1	Neuro system
-	ENSMMUG00000064105	-0.518438	0.838139	0.749817	2.60573	-0.834835	-0.834835	-0.834835	-0.834835	0.392239	0.870251	-0.235649	-0.471193	-0.0567186	-0.834835	1	Neuro system
Metazoa_SRP	ENSMMUG00000059567	-0.477429	-0.139033	2.09017	1.96922	-0.478515	-0.485988	-0.628061	1.19315	-0.715527	0.218562	-0.685126	-0.54838	-0.532127	-0.780916	1	Neuro system
CAMK1G	ENSMMUG00000003369	3.10544	0.468237	0.772746	0.163898	-0.598607	-0.497875	-0.517059	-0.276127	-0.586677	-0.566402	-0.600602	0.147892	-0.490207	-0.524661	1	Neuro system
-	ENSMMUG00000052871	1.59693	-0.452607	1.65775	2.20957	-0.558263	-0.50833	-0.543885	-0.536838	-0.207688	-0.558263	-0.558263	-0.476243	-0.505611	-0.558263	1	Neuro system
SLC30A1	ENSMMUG00000000868	-0.0323816	0.240707	0.19108	2.45526	1.02933	-0.894522	-1.45951	-0.428284	-0.0464833	-0.621593	-0.705228	0.386986	-0.968892	0.853535	1	Neuro system
-	ENSMMUG00000054466	0.983108	0.195867	-0.312534	2.80088	-0.540187	-0.877219	-0.877219	0.138225	-0.658587	0.641786	-0.236665	0.289024	-0.66926	-0.877219	1	Neuro system
USH2A	ENSMMUG00000022640	-0.362431	3.45102	-0.124595	-0.362431	-0.238223	-0.248215	-0.28171	-0.322335	-0.281858	-0.362431	-0.354	0.0673701	-0.318637	-0.261527	1	Neuro system
-	ENSMMUG00000056106	-0.854599	-0.0928104	-0.339191	3.06205	-0.854599	-0.37457	0.389345	-0.545655	-0.189422	0.809139	-0.464829	0.328146	-0.601517	-0.271489	1	Neuro system
TGFB2	ENSMMUG00000004071	-0.863638	1.41304	1.02938	1.5106	-0.457756	-0.691826	0.377812	1.03163	-1.11576	0.498367	-1.22027	-0.178623	0.0812006	-1.41417	1	Neuro system
-	ENSMMUG00000052461	3.02011	-0.206236	-0.275066	0.866916	-0.532969	-0.532969	-0.532969	0.858353	-0.532969	-0.532969	-0.532969	-0.000322197	-0.532969	-0.532969	1	Neuro system
-	ENSMMUG00000054365	0.451864	-0.251546	0.759206	3.0993	-0.524283	-0.482899	-0.521625	-0.492739	0.414765	-0.329244	-0.536361	-0.276834	-0.542371	-0.76723	1	Neuro system
Metazoa_SRP	ENSMMUG00000051660	-0.267261	-0.267261	-0.267261	3.4744	-0.267261	-0.267261	-0.267261	-0.267261	-0.267261	-0.267261	-0.267261	-0.267261	-0.267261	-0.267261	1	Neuro system
Metazoa_SRP	ENSMMUG00000057669	-0.479094	1.35034	-0.479094	2.65618	-0.479094	-0.479094	1.26351	-0.479094	-0.479094	-0.479094	-0.479094	-0.479094	-0.479094	-0.479094	1	Neuro system
Metazoa_SRP	ENSMMUG00000063003	-0.267261	-0.267261	-0.267261	3.4744	-0.267261	-0.267261	-0.267261	-0.267261	-0.267261	-0.267261	-0.267261	-0.267261	-0.267261	-0.267261	1	Neuro system
CNIH3	ENSMMUG00000010335	0.443632	-0.276057	-0.166575	0.974615	-0.770945	-0.586169	0.426536	2.95532	-0.862481	-0.350693	-0.702328	-0.250099	-0.666847	-0.167911	1	Neuro system
Metazoa_SRP	ENSMMUG00000050780	-0.952619	-0.743179	-0.62198	2.9957	-0.557937	-0.721662	0.0448817	0.533806	-0.440559	-0.596851	-0.0149648	0.640737	0.26504	0.169591	1	Neuro system
STUM	ENSMMUG00000008640	1.41356	1.16866	0.00826314	1.51433	-0.750156	-0.549576	-0.983257	-0.99664	1.45692	-0.333651	-1.03575	0.46161	-0.523106	-0.851197	1	Neuro system
ITPKB	ENSMMUG00000061649	-0.721677	0.967523	0.217035	2.50914	-0.402429	-0.708069	-0.876533	0.704793	-0.117149	1.10568	-0.977826	-0.28933	-0.711957	-0.699196	1	Neuro system
C1H1orf35	ENSMMUG00000002791	-0.0569302	0.139689	2.05011	2.15654	-0.30404	-0.771639	-0.822984	0.521351	-0.777768	-0.015888	-1.04032	-0.204165	-0.870367	-0.00358316	1	Neuro system
GJC2	ENSMMUG00000023086	-0.191743	0.88513	0.156375	3.23462	-0.419132	-0.400099	-0.446812	-0.284389	-0.451484	-0.380662	-0.447092	-0.430161	-0.448632	-0.375924	1	Neuro system
RNF187	ENSMMUG00000048590	0.185638	0.155741	0.893494	2.62165	-0.488509	-1.04051	-0.658583	0.844266	0.446079	0.0321904	-0.844026	-0.495144	-0.452309	-1.19997	1	Neuro system
5S_rRNA	ENSMMUG00000063734	3.4744	-0.267261	-0.267261	-0.267261	-0.267261	-0.267261	-0.267261	-0.267261	-0.267261	-0.267261	-0.267261	-0.267261	-0.267261	-0.267261	1	Neuro system
5S_rRNA	ENSMMUG00000026427	2.95297	-0.384607	-0.429891	1.5879	-0.387223	-0.429891	-0.386757	-0.365614	-0.26382	-0.429891	-0.429891	-0.331461	-0.271927	-0.429891	1	Neuro system
MPZ	ENSMMUG00000001216	-0.277876	3.47426	-0.257736	-0.247704	-0.267302	-0.272226	-0.275095	-0.266216	-0.269765	-0.263383	-0.274939	-0.256792	-0.264606	-0.280617	1	Neuro system
-	ENSMMUG00000042475	2.12333	1.6818	-0.104623	1.54702	-0.647512	-0.676607	-0.690951	-0.187152	-0.474868	-0.724039	-0.73535	-0.0767935	-0.379186	-0.655073	1	Neuro system
ADAMTS4	ENSMMUG00000050419	-0.488674	2.57106	0.336297	1.71798	-0.126731	-0.622663	-0.651268	0.523035	-0.139196	-0.60447	-0.624874	-0.58587	-0.564818	-0.739808	1	Neuro system
-	ENSMMUG00000062837	-0.431651	0.764511	-0.0649116	3.25577	-0.360917	-0.400807	-0.502841	0.0392877	0.0173614	-0.465976	-0.436195	-0.484428	-0.412003	-0.517204	1	Neuro system
PEA15	ENSMMUG00000017838	1.11553	2.23808	1.16049	1.29187	-0.514035	-0.636538	-0.579854	-0.179856	-0.566943	-0.390576	-0.816655	-0.631415	-0.598144	-0.89195	1	Neuro system
ATP1A2	ENSMMUG00000017833	0.190285	1.86563	1.2551	1.18518	-0.596472	-0.673839	1.54403	-0.717443	-0.725413	-0.724724	-0.739227	-0.458396	-0.697408	-0.707307	1	Neuro system
CFAP45	ENSMMUG00000011342	-1.0146	0.0578872	0.712924	1.08142	0.762791	-0.935374	-0.894362	1.69307	-0.382189	0.528269	-1.07407	-0.800685	1.33898	-1.07407	1	Neuro system
-	ENSMMUG00000063517	-0.483004	-0.0775207	2.20263	2.43792	-0.293917	-0.546335	-0.546335	-0.166079	-0.136977	-0.20504	-0.546335	-0.546335	-0.546335	-0.546335	1	Neuro system
LRRC71	ENSMMUG00000064007	-0.400262	-0.452987	1.89792	2.57836	-0.655139	-0.580832	0.243463	-0.463846	-0.655139	-0.19729	-0.655139	0.223666	-0.498434	-0.384349	1	Neuro system
PRCC	ENSMMUG00000010918	0.352179	-0.515875	1.16968	1.5585	-0.193887	-1.03042	-0.0887994	-0.575485	-0.866935	1.76365	-0.949024	0.581667	0.276853	-1.48211	1	Neuro system
NES	ENSMMUG00000006265	-0.424415	2.11042	-0.596794	0.975845	1.78815	-0.519456	0.0487882	0.631008	-0.191504	-0.342511	-0.948597	-0.857236	-0.85034	-0.823361	1	Neuro system
BCAN	ENSMMUG00000017093	0.198216	1.56802	0.478701	2.78286	-0.50885	-0.505978	-0.509309	-0.509778	-0.506167	-0.496399	-0.506252	-0.483028	-0.494896	-0.50714	1	Neuro system
HAPLN2	ENSMMUG00000060011	-0.29816	1.55215	0.485954	2.85523	-0.467326	-0.462851	-0.465265	-0.467321	-0.447514	-0.467081	-0.466231	-0.421806	-0.463541	-0.466237	1	Neuro system
PAQR6	ENSMMUG00000000085	1.55319	1.67714	0.181278	2.15482	-0.555323	-0.558278	-0.559118	-0.558469	-0.55874	-0.549082	-0.561661	-0.548163	-0.558692	-0.558903	1	Neuro system
SYT11	ENSMMUG00000021312	0.542656	1.12399	1.95798	2.07876	-0.518252	-0.59312	-0.612134	-0.460005	-0.582952	-0.535056	-0.672947	-0.534247	-0.561587	-0.633081	1	Neuro system
-	ENSMMUG00000058124	1.4656	-0.120874	0.091145	2.19807	-0.280739	-0.620216	-0.741939	1.58383	-0.477414	-0.205108	-0.869366	-0.448926	-0.853711	-0.720364	1	Neuro system
FAM189B	ENSMMUG00000018309	-0.348402	0.314935	1.49132	2.24674	-0.431799	-0.742775	-0.728637	1.20457	-0.186268	-0.226013	-1.30538	-0.0788385	-0.244075	-0.965366	1	Neuro system
EFNA3	ENSMMUG00000023350	1.25675	0.967459	1.27153	1.21287	0.752966	0.091637	-1.12562	-1.08597	-0.499592	0.454741	-1.65868	-0.838098	-0.130697	-0.669291	1	Neuro system
Metazoa_SRP	ENSMMUG00000047025	-0.364653	0.360842	-0.364653	3.3654	-0.364653	-0.364653	-0.364653	-0.364653	-0.364653	-0.364653	0.284948	-0.364653	-0.364653	-0.364653	1	Neuro system
LORICRIN	ENSMMUG00000043598	0.378567	0.089475	-0.166055	3.38482	-0.376014	-0.302684	-0.376014	-0.376014	-0.376014	-0.376014	-0.376014	-0.376014	-0.376014	-0.376014	1	Neuro system
-	ENSMMUG00000064774	0.158743	1.84781	1.33589	0.963305	0.109639	1.45624	-0.95398	-0.705921	-0.338314	-0.486064	-0.956707	-0.947573	-0.888461	-0.594599	1	Neuro system
-	ENSMMUG00000054850	-0.264451	-0.350954	0.526199	3.35937	-0.0766336	-0.169925	-0.405764	-0.430074	-0.164566	-0.373581	-0.344253	-0.419523	-0.384716	-0.501128	1	Neuro system
C2CD4D	ENSMMUG00000014358	-0.600897	0.574984	0.512905	3.22802	-0.323909	-0.600897	-0.320878	-0.433989	-0.457151	-0.201413	-0.232391	-0.0897117	-0.532532	-0.52214	1	Neuro system
MINDY1	ENSMMUG00000010067	-1.201	1.0869	-0.105485	2.24246	-0.439862	-0.462615	-0.805163	0.731189	0.381799	0.0153242	-1.10331	0.892191	0.0269432	-1.25938	1	Neuro system
Metazoa_SRP	ENSMMUG00000061867	0.137681	-0.0525688	1.05413	2.51942	0.0151735	-0.79533	-0.45433	-0.576666	-0.780252	0.77735	-0.821445	0.845275	-0.93422	-0.93422	1	Neuro system
-	ENSMMUG00000060724	1.46547	-0.324354	-0.120533	2.96888	-0.149483	-0.539489	-0.545003	-0.304062	-0.262889	-0.348095	-0.571448	-0.0986265	-0.540056	-0.630317	1	Neuro system
OTUD7B	ENSMMUG00000007244	1.07178	2.07141	0.2913	0.742319	-0.360013	-0.797413	-0.0065281	1.23709	-0.59923	-0.630203	-1.13533	0.258206	-0.7402	-1.40319	1	Neuro system
-	ENSMMUG00000052282	1.04847	1.60153	-0.286737	1.70878	-0.0702182	-0.283547	0.757789	0.635169	-0.405253	-0.687279	-1.34465	-0.352822	-1.09969	-1.22154	1	Neuro system
U1	ENSMMUG00000035621	0.3592	-0.403225	1.14751	2.73846	-0.818299	-0.818299	-0.818299	-0.818299	-0.310892	0.59184	-0.818299	0.0839173	0.146977	-0.262292	1	Neuro system
Y_RNA	ENSMMUG00000065199	3.04491	1.43413	-0.373253	-0.373253	-0.373253	-0.373253	-0.373253	-0.373253	-0.373253	-0.373253	-0.373253	-0.373253	-0.373253	-0.373253	1	Neuro system
U1	ENSMMUG00000028051	-0.567752	1.51316	-0.567752	1.21538	-0.567752	-0.567752	-0.567752	2.38595	-0.567752	-0.567752	-0.567752	0.56303	-0.567752	-0.567752	1	Neuro system
-	ENSMMUG00000052186	0.0762924	-0.113288	-0.566375	3.12199	-0.566375	-0.441466	0.620479	0.719873	-0.150968	-0.566375	-0.566375	-0.566375	-0.434665	-0.566375	1	Neuro system
PTGFRN	ENSMMUG00000016900	-0.638082	-0.152737	-0.65362	1.90334	0.803631	-0.471132	-0.435302	0.599816	-0.461638	-0.796015	-1.63746	1.88888	0.07692	-0.026605	1	Neuro system
Y_RNA	ENSMMUG00000025287	-0.496395	-0.496395	-0.496395	2.07326	-0.496395	-0.496395	-0.496395	-0.496395	1.33653	2.05056	-0.496395	-0.496395	-0.496395	-0.496395	1	Neuro system
SYT6	ENSMMUG00000009781	0.0093121	0.650086	-0.0124197	3.30323	-0.462975	-0.447238	-0.462975	-0.402209	-0.428086	-0.366015	-0.450197	-0.400939	-0.429789	-0.0997863	1	Neuro system
Metazoa_SRP	ENSMMUG00000051866	-0.901201	0.0109122	-0.00124306	2.22515	-0.149207	-0.775473	-0.575392	2.01182	0.0744338	0.0671542	-0.799113	0.461831	-0.901201	-0.748475	1	Neuro system
KCNC4	ENSMMUG00000004614	-0.00846379	0.508717	2.01343	2.17645	-0.64241	-0.660253	0.739054	-0.645637	-0.674427	-0.291991	-0.705279	-0.673396	-0.604446	-0.531339	1	Neuro system
-	ENSMMUG00000053602	-0.241845	1.59255	-0.585037	2.83591	-0.585037	-0.384929	-0.239331	-0.585037	0.0804596	-0.276789	-0.585037	-0.585037	-0.585037	0.144201	1	Neuro system
Metazoa_SRP	ENSMMUG00000063766	1.58763	-0.624618	-0.624618	1.78102	-0.624618	-0.108651	-0.178927	2.03197	-0.624618	-0.624618	-0.624618	-0.116101	-0.624618	-0.624618	1	Neuro system
PSRC1	ENSMMUG00000015380	1.10596	2.16065	0.492517	1.18991	-0.905535	-0.923731	-1.0174	0.109608	-0.565753	0.848987	-0.855364	-0.404913	-0.493686	-0.741244	1	Neuro system
TAF13	ENSMMUG00000065038	0.350363	-0.304649	-0.452583	2.6237	0.0417067	-0.416316	-0.198833	-0.842042	1.64094	-0.316615	-0.664705	-0.16649	-0.06763	-1.22684	1	Neuro system
HENMT1	ENSMMUG00000009431	0.0628631	1.25419	0.434695	0.284071	-0.548557	1.13154	-0.372901	-0.988206	-0.175942	-0.724058	-1.26804	-0.938868	-0.435927	2.28513	1	Neuro system
-	ENSMMUG00000031785	1.08007	0.363488	1.88188	1.41602	-0.714106	-0.646486	-1.11107	0.981957	-0.33854	0.320227	-0.922455	-0.653194	-1.11107	-0.546721	1	Neuro system
-	ENSMMUG00000053667	0.557011	-0.13319	0.159621	3.26313	-0.480268	-0.546194	-0.55886	-0.280075	0.185555	-0.352684	-0.56368	-0.364227	-0.246948	-0.639191	1	Neuro system
COL11A1	ENSMMUG00000004103	-0.18049	1.84167	0.162399	2.71593	-0.513842	-0.525483	-0.381155	-0.163978	-0.498895	-0.447838	-0.514394	-0.490163	-0.537939	-0.465823	1	Neuro system
Metazoa_SRP	ENSMMUG00000061839	2.61264	-0.285704	-0.37246	1.94919	0.175554	-0.356929	-0.599462	-0.259112	-0.319953	-0.26031	-0.65144	-0.305899	-0.697533	-0.628576	1	Neuro system
GPR88	ENSMMUG00000055443	0.44257	0.381747	-0.439792	3.3118	-0.319657	-0.246588	-0.500337	-0.418681	-0.500337	-0.142034	-0.311469	-0.333613	-0.500337	-0.423277	1	Neuro system
-	ENSMMUG00000056439	1.62993	1.02354	0.811828	2.29192	-0.617554	-0.617554	-0.617554	-0.617554	-0.340843	-0.617554	-0.617554	-0.617554	-0.551753	-0.54175	1	Neuro system
-	ENSMMUG00000049494	1.33797	0.00770028	-0.39457	3.0714	-0.412498	-0.399975	-0.412498	-0.412498	-0.412498	-0.412498	-0.40233	-0.363128	-0.412498	-0.382073	1	Neuro system
-	ENSMMUG00000054681	2.93603	-0.336821	-0.387173	1.62329	-0.420002	-0.374139	-0.400194	-0.380646	-0.326792	-0.349354	-0.407589	-0.344667	-0.411942	-0.420002	1	Neuro system
Y_RNA	ENSMMUG00000052469	-0.267261	3.4744	-0.267261	-0.267261	-0.267261	-0.267261	-0.267261	-0.267261	-0.267261	-0.267261	-0.267261	-0.267261	-0.267261	-0.267261	1	Neuro system
-	ENSMMUG00000055525	-0.681541	-0.60459	0.210609	3.0597	-0.115219	-0.414797	-0.625139	-0.129065	0.918492	0.177563	-0.329627	0.0263105	-0.556003	-0.936696	1	Neuro system
Metazoa_SRP	ENSMMUG00000042929	0.0333186	0.0633644	-0.489081	3.29803	0.0314504	-0.489081	0.0371453	-0.489081	-0.489081	0.449335	-0.489081	-0.489081	-0.489081	-0.489081	1	Neuro system
-	ENSMMUG00000053628	-0.410615	-0.387512	-0.476997	1.73565	-0.412051	-0.812291	2.42466	-0.812291	0.74552	-0.451514	-0.62212	0.572675	-0.56533	-0.527788	1	Neuro system
Metazoa_SRP	ENSMMUG00000062816	-0.0853767	-0.177563	-0.366715	3.19909	-0.566199	-0.46112	-0.548962	-0.118171	0.969789	-0.079834	-0.443113	-0.330011	-0.493462	-0.498352	1	Neuro system
LPAR3	ENSMMUG00000015402	-0.701695	1.36633	0.302753	2.39352	0.162198	0.178254	-0.778246	1.14085	-0.656543	-0.821294	-0.837671	-0.479247	-0.713688	-0.555516	1	Neuro system
-	ENSMMUG00000057763	0.135796	-0.296133	0.239767	3.375	-0.231131	-0.320131	-0.461019	-0.441999	-0.450023	-0.326824	-0.445109	0.0757462	-0.381401	-0.472538	1	Neuro system
-	ENSMMUG00000057772	0.0183049	-0.282409	0.0568171	3.14996	-0.75815	-0.610046	-0.533586	-0.202954	0.707925	0.326305	-0.44871	-0.231519	-0.323315	-0.868619	1	Neuro system
-	ENSMMUG00000060674	-0.492257	-0.620513	1.14869	2.84553	-0.283717	-0.515794	-0.0655063	-0.737822	0.517767	0.41756	-0.57735	-0.0365465	-0.756871	-0.843171	1	Neuro system
-	ENSMMUG00000062662	2.38996	-0.561978	-0.418979	1.9779	-0.506304	-0.0200675	-0.670166	-0.693766	0.509748	-0.269891	-0.387105	0.0296204	-0.326677	-1.0523	1	Neuro system
Metazoa_SRP	ENSMMUG00000050502	-1.04525	0.36439	0.141613	2.98114	-0.42542	-0.941619	-0.418639	0.822239	-0.126203	-0.406717	-0.624524	0.282496	-0.0617939	-0.541713	1	Neuro system
AK5	ENSMMUG00000020218	3.10205	0.758075	0.669327	0.109505	-0.532562	-0.641191	-0.419425	-0.395747	-0.41109	-0.277945	-0.647465	-0.30439	-0.349554	-0.659585	1	Neuro system
-	ENSMMUG00000053069	0.950877	0.311478	-0.311674	3.14656	-0.513403	-0.599212	-0.425718	-0.469946	-0.376557	0.0195687	-0.436127	-0.203312	-0.493319	-0.599212	1	Neuro system
ST6GALNAC3	ENSMMUG00000005990	-0.636782	2.72299	0.505191	1.02218	-0.258975	-0.58413	-0.794727	-0.628716	-0.249125	1.03414	-0.617734	-0.496898	-0.2197	-0.797715	1	Neuro system
-	ENSMMUG00000061900	0.0462312	-0.313705	-0.304039	2.22016	-0.788926	-0.40056	-0.831255	-0.832127	1.70473	1.24523	-0.63127	-0.00484633	-0.207856	-0.901769	1	Neuro system
-	ENSMMUG00000059469	3.09146	-0.149327	0.228552	0.502271	-0.511044	-0.454548	-0.548024	-0.529498	-0.440297	-0.383607	-0.514762	0.880471	-0.585822	-0.585822	1	Neuro system
-	ENSMMUG00000065181	1.80667	-0.241336	0.0559837	2.77578	-0.432981	-0.434619	-0.476926	-0.465978	-0.298616	-0.479346	-0.478266	-0.359103	-0.471996	-0.499261	1	Neuro system
Metazoa_SRP	ENSMMUG00000059691	-0.656214	-0.401536	0.147896	3.27199	0.063684	-0.0945283	-0.413623	-0.656214	-0.656214	0.209009	0.0278962	0.17415	-0.36008	-0.656214	1	Neuro system
-	ENSMMUG00000050619	-0.100053	-0.0269252	2.33413	2.17896	-0.399458	-0.723875	-0.629041	-0.712782	0.222341	-0.346004	-0.542958	-0.0392042	-0.640314	-0.574819	1	Neuro system
Metazoa_SRP	ENSMMUG00000053416	-0.176255	-0.148942	-0.254735	3.22181	-0.414544	-0.374242	-0.172776	0.774516	-0.344182	0.201918	-0.651134	-0.651134	-0.359166	-0.651134	1	Neuro system
KANK4	ENSMMUG00000010351	-0.486349	3.40111	-0.100869	0.210574	-0.216705	-0.358843	-0.454823	-0.315077	-0.0808422	-0.455347	-0.0693038	-0.421838	-0.166895	-0.484795	1	Neuro system
Metazoa_SRP	ENSMMUG00000054861	-0.0269033	0.435838	-0.441907	3.31878	-0.441907	-0.441907	-0.441907	0.181041	-0.441907	-0.441907	-0.441907	-0.441907	0.068403	-0.441907	1	Neuro system
-	ENSMMUG00000057445	0.34279	-0.3328	-0.540338	3.01644	-0.442564	-0.311479	-0.540338	0.0488319	1.23559	-0.540338	-0.540338	-0.314783	-0.540338	-0.540338	1	Neuro system
-	ENSMMUG00000009114	-0.783454	1.5831	0.493884	1.10443	1.74457	0.388488	-0.794848	-0.736082	-0.635805	-0.753147	-1.07331	0.885724	-0.963784	-0.459771	1	Neuro system
Metazoa_SRP	ENSMMUG00000058879	0.247409	0.307018	-0.356426	2.49808	1.01822	-0.637909	-0.788984	-0.788984	1.22072	-0.788984	-0.788984	0.253271	-0.788984	-0.605467	1	Neuro system
Metazoa_SRP	ENSMMUG00000060400	-0.0110867	-0.61614	1.39121	2.36118	-0.0148368	-1.05972	-0.637192	-0.115279	-0.517467	1.20074	-0.265368	0.145496	-0.801827	-1.05972	1	Neuro system
Metazoa_SRP	ENSMMUG00000053923	0.418043	1.64479	-1.19075	1.72497	-0.656406	-1.19075	-0.110366	1.22416	-0.497493	-0.22743	-0.175186	0.658271	-1.19075	-0.431092	1	Neuro system
U6	ENSMMUG00000025663	-0.668455	-0.447211	1.45193	2.72922	-0.471454	-0.172707	-0.0673807	-0.866875	-0.866875	0.202425	-0.115348	0.501416	-0.622887	-0.585797	1	Neuro system
U4	ENSMMUG00000034993	-0.706093	-0.680724	1.06194	1.65071	0.171332	0.395932	-0.925017	1.83222	0.563452	-0.354837	-1.14717	0.120181	-1.14717	-0.83476	1	Neuro system
RAB3B	ENSMMUG00000014035	0.896644	1.18822	1.56895	1.98591	-0.497491	-0.791424	-0.808674	-0.802246	-0.771298	-0.798402	-0.365688	0.360238	-0.453601	-0.711138	1	Neuro system
Y_RNA	ENSMMUG00000034906	3.4744	-0.267261	-0.267261	-0.267261	-0.267261	-0.267261	-0.267261	-0.267261	-0.267261	-0.267261	-0.267261	-0.267261	-0.267261	-0.267261	1	Neuro system
-	ENSMMUG00000056990	0.0910964	0.885528	-0.224892	2.822	-0.384737	-0.621379	-0.621379	-0.621379	1.22074	-0.621379	-0.396501	-0.621379	-0.621379	-0.284953	1	Neuro system
Metazoa_SRP	ENSMMUG00000058023	1.19329	0.673471	-0.568867	2.89094	-0.422545	-0.568867	-0.568867	0.312837	-0.568867	-0.305078	-0.568867	-0.568867	-0.568867	-0.360847	1	Neuro system
FOXD2	ENSMMUG00000018556	0.0222	3.36447	-0.389668	-0.223358	-0.419378	-0.360409	-0.374432	-0.463362	-0.00684271	-0.225478	-0.463362	-0.463362	-0.409083	0.412067	1	Neuro system
Metazoa_SRP	ENSMMUG00000060852	-0.382377	-0.382377	-0.382377	2.89349	-0.382377	-0.382377	-0.382377	-0.382377	-0.382377	-0.382377	-0.382377	1.69503	-0.382377	-0.382377	1	Neuro system
BTBD19	ENSMMUG00000040001	-0.436916	0.156609	-0.418675	1.20866	0.133437	-0.508861	-0.683116	2.99761	-0.396786	0.111637	-0.6726	-0.499797	-0.662988	-0.328216	1	Neuro system
RNF220	ENSMMUG00000023784	-0.257648	2.54978	0.925992	1.57864	-0.332137	-0.66692	-0.486342	-0.264662	-0.757587	0.042567	-0.736919	-0.183026	-0.51581	-0.895919	1	Neuro system
Metazoa_SRP	ENSMMUG00000056209	-0.395889	0.648722	-0.258464	3.3338	-0.231845	-0.299895	-0.395889	-0.025202	-0.395889	-0.395889	-0.395889	-0.395889	-0.395889	-0.395889	1	Neuro system
ERI3	ENSMMUG00000011651	-0.480687	-0.0677341	1.27873	1.16043	0.113967	-0.322062	0.978272	-0.180078	1.16509	1.15543	-1.53995	-1.06902	-1.27845	-0.913941	1	Neuro system
SLC6A9	ENSMMUG00000015158	-0.542227	2.0269	0.610622	2.22951	-0.648854	-0.674604	-0.646196	0.166637	-0.568518	-0.625768	-0.651828	-0.417263	0.411841	-0.670255	1	Neuro system
CCDC24	ENSMMUG00000015156	-0.148975	1.18208	0.471026	2.96479	-0.705386	-0.689655	-0.629688	0.064801	-0.270559	-0.231681	-0.709977	-0.414266	-0.478635	-0.403869	1	Neuro system
B4GALT2	ENSMMUG00000015155	1.69255	1.13784	1.25303	1.378	-0.0655177	-0.731773	0.354121	-0.581935	-0.641179	-0.874649	-1.1721	-0.539001	0.02619	-1.23558	1	Neuro system
Metazoa_SRP	ENSMMUG00000054847	1.80367	-0.221722	-0.247762	2.66628	-0.343165	-0.279831	-0.620994	-0.294891	-0.594368	-0.71496	-0.538304	0.357155	-0.25614	-0.71496	1	Neuro system
MED8	ENSMMUG00000023671	-0.861282	0.983243	0.177519	2.5907	-0.605415	-0.735613	-0.963125	0.569265	-0.232579	0.73128	-0.795008	0.060516	0.149174	-1.06867	1	Neuro system
SLC2A1	ENSMMUG00000000373	-0.562739	2.45396	1.02036	1.1828	-0.456225	-0.656627	-0.825428	-0.830693	0.1105	-0.370116	-0.453588	-0.62607	0.862387	-0.848516	1	Neuro system
-	ENSMMUG00000055029	1.08622	1.22562	1.64993	1.98051	-0.484362	-0.283072	-0.555927	-0.666259	-0.666259	-0.666259	-0.666259	-0.666259	-0.621364	-0.666259	1	Neuro system
-	ENSMMUG00000049561	0.148707	-0.202047	0.452018	3.28021	-0.154585	-0.2408	-0.68016	-0.567052	-0.387926	0.13199	-0.537461	-0.160541	-0.402191	-0.68016	1	Neuro system
-	ENSMMUG00000052393	0.224449	-0.419954	1.24304	3.04898	-0.599106	-0.201111	-0.515279	-0.55756	-0.255427	-0.237476	-0.369323	-0.302661	-0.37744	-0.681137	1	Neuro system
FOXO6	ENSMMUG00000044175	1.52877	-0.362994	-0.320232	0.953556	-0.352472	-0.714901	1.04091	-0.556565	-0.798405	-0.73409	-0.798405	-0.551512	-0.578281	2.24463	1	Neuro system
KCNQ4	ENSMMUG00000019536	-0.842981	1.82428	-0.128063	0.884596	-0.663866	-0.688812	1.1931	0.66724	-0.886965	-0.795323	-0.817765	1.50385	-0.272044	-0.977253	1	Neuro system
-	ENSMMUG00000057845	0.234229	-0.320575	0.46303	2.86233	-0.737342	-0.720857	-0.736283	0.332179	-0.834117	1.08501	-0.558225	-0.0527435	-0.595264	-0.421373	1	Neuro system
COL9A2	ENSMMUG00000018664	-0.244101	1.00416	0.0125109	3.21295	-0.414125	-0.397003	-0.446749	-0.378734	-0.43402	-0.309662	-0.435355	-0.327555	-0.442631	-0.399683	1	Neuro system
Metazoa_SRP	ENSMMUG00000052547	0.290131	-0.639087	-0.244875	2.18214	1.56812	-0.193494	-0.671418	-0.353361	-0.903932	0.994033	-0.71035	0.530604	-0.5282	-1.32032	1	Neuro system
-	ENSMMUG00000054563	1.16203	-0.377644	-0.494426	3.1081	-0.274355	-0.365646	-0.494426	0.168628	-0.494426	-0.494426	-0.494426	-0.367506	-0.0870529	-0.494426	1	Neuro system
-	ENSMMUG00000057080	-0.0102889	-0.284701	0.1611	3.36972	-0.239975	-0.229683	-0.465114	-0.264994	-0.338256	0.127672	-0.617066	-0.0971888	-0.519374	-0.591852	1	Neuro system
Metazoa_SRP	ENSMMUG00000062810	-0.225734	0.562509	1.69642	2.33652	-0.466355	-0.705262	-0.705262	-0.34536	-0.705262	-0.27456	-0.705262	0.948134	-0.705262	-0.705262	1	Neuro system
POU3F1	ENSMMUG00000044406	2.38202	2.12398	-0.368641	0.141107	-0.594517	-0.594517	-0.594517	-0.391427	-0.244704	-0.594517	-0.594517	-0.439017	-0.594517	0.363779	1	Neuro system
C1orf122	ENSMMUG00000005371	0.15081	0.145828	-0.0510387	3.37584	0.0184784	-0.367307	-0.393497	-0.44212	-0.47486	-0.384531	-0.518602	-0.427931	-0.468752	-0.162321	1	Neuro system
EPHA10	ENSMMUG00000022038	1.03496	1.46855	1.10759	2.18248	-0.737321	-0.725247	-0.753302	-0.63293	-0.722202	-0.105068	-0.722929	-0.605837	-0.31943	-0.469309	1	Neuro system
DNALI1	ENSMMUG00000008418	-0.722403	2.16161	0.419711	1.97678	-0.76975	-0.855153	-0.768218	0.0043321	0.846411	-0.320737	-0.599286	-0.479067	-0.448963	-0.44527	1	Neuro system
GRIK3	ENSMMUG00000009679	0.0621353	2.00756	1.56839	1.74217	-0.349383	-0.207347	-0.846598	-0.85376	-0.799953	-0.310991	-0.65126	-0.346674	-0.687116	-0.327175	1	Neuro system
MAP7D1	ENSMMUG00000022500	-0.147799	0.220119	1.68564	2.06912	0.498124	-0.295308	1.13072	-0.29071	-0.912762	-0.537615	-1.01435	-0.664947	-0.895016	-0.845219	1	Neuro system
Metazoa_SRP	ENSMMUG00000062030	1.95478	-0.258548	-0.852241	2.20017	-0.292845	0.457131	-0.286725	-0.852241	-0.852241	-0.852241	0.210934	0.438226	-0.16191	-0.852241	1	Neuro system
C1orf216	ENSMMUG00000059270	1.65272	1.73135	1.18161	1.26343	-0.568213	-0.39822	-0.358149	-0.249287	-0.745979	-0.110977	-0.956023	-0.517947	-0.916851	-1.00746	1	Neuro system
Metazoa_SRP	ENSMMUG00000060204	-0.598387	-0.598387	1.47812	1.65584	0.0212916	-0.598387	0.0280712	2.20216	-0.598387	-0.598387	-0.598387	-0.598387	-0.598387	-0.598387	1	Neuro system
NCDN	ENSMMUG00000019812	1.8973	0.824459	1.63016	1.58501	-0.575576	-0.613642	-0.473264	-0.596185	-0.620065	-0.53561	-0.630587	-0.618082	-0.613409	-0.660512	1	Neuro system
Metazoa_SRP	ENSMMUG00000058564	0.0636014	-0.178196	1.98079	2.58643	-0.551892	-0.357796	-0.618465	-0.243415	-0.226255	-0.387969	-0.6914	-0.128028	-0.588092	-0.659317	1	Neuro system
Metazoa_SRP	ENSMMUG00000055536	-0.10334	-0.445606	0.596533	3.226	-0.336809	-0.432968	-0.568615	0.129793	-0.267871	-0.568615	-0.458474	0.367198	-0.568615	-0.568615	1	Neuro system
-	ENSMMUG00000061357	-0.0688217	-0.34599	0.663935	3.30681	-0.24954	-0.0750121	-0.499814	-0.374179	-0.117884	-0.471458	-0.501986	-0.370798	-0.35925	-0.536015	1	Neuro system
-	ENSMMUG00000053629	0.190316	-0.277276	0.151669	3.40374	-0.211445	-0.401316	-0.388714	-0.396342	-0.149827	-0.391956	-0.418636	-0.333285	-0.400373	-0.376557	1	Neuro system
-	ENSMMUG00000055077	0.535215	1.13517	0.87468	2.75693	-0.602094	-0.602094	-0.602094	-0.602094	-0.54764	-0.526427	-0.602094	-0.602094	-0.550298	-0.0650651	1	Neuro system
MARCKSL1	ENSMMUG00000009951	-0.258044	1.18986	0.323098	2.99943	-0.635314	-0.665718	-0.667895	-0.18638	-0.558506	-0.00736398	-0.613678	-0.536932	-0.051636	-0.330922	1	Neuro system
Metazoa_SRP	ENSMMUG00000060894	0.483001	-0.43357	-0.43357	3.30404	-0.43357	-0.43357	-0.43357	-0.089612	-0.43357	-0.43357	-0.43357	0.356506	-0.151804	-0.43357	1	Neuro system
SPOCD1	ENSMMUG00000005466	-0.191967	0.0389259	-0.349792	0.0667976	-0.274886	-0.394554	-0.356322	-0.202113	-0.391946	-0.381571	-0.399071	-0.22916	-0.367914	3.43357	1	Neuro system
ADGRB2	ENSMMUG00000023401	1.55067	0.8482	2.17146	1.29786	-0.574605	-0.622041	-0.632807	-0.530427	-0.592977	-0.573462	-0.679296	-0.556283	-0.637036	-0.469257	1	Neuro system
COL16A1	ENSMMUG00000023398	-0.788506	0.291527	-0.29379	2.04405	-0.0341106	-0.685864	-0.329433	2.42964	-0.496694	-0.61918	-0.867006	-0.339485	-0.164082	-0.147062	1	Neuro system
SDC3	ENSMMUG00000013519	-0.210243	0.544097	0.658479	1.75539	-0.575092	-0.799374	-0.998053	1.33138	-0.687667	1.71745	-0.743823	-0.468839	-0.603933	-0.919779	1	Neuro system
-	ENSMMUG00000055489	-1.09369	1.0647	1.07613	1.86828	-0.245823	-0.916391	-0.876771	0.984893	-0.587082	0.882678	-0.707256	0.178127	-0.365478	-1.26233	1	Neuro system
Metazoa_SRP	ENSMMUG00000062002	-0.3117	-0.192237	-0.310951	3.26832	0.217692	-0.755771	-0.487376	-0.0891912	-0.52614	0.520565	-0.587576	0.0608374	-0.428139	-0.378334	1	Neuro system
MED18	ENSMMUG00000010353	0.203353	-0.763616	-1.08527	1.88787	-0.697029	-0.667789	0.468504	-1.34044	0.256021	0.039254	0.758877	1.02329	1.18161	-1.26463	1	Neuro system
-	ENSMMUG00000057915	2.36372	-0.30485	-0.299927	0.216378	-0.464023	-0.511543	-0.520993	2.267	-0.517357	-0.407987	-0.521762	-0.29961	-0.51033	-0.488717	1	Neuro system
IFI6	ENSMMUG00000011454	-0.220645	-0.0991141	-0.304643	1.222	-0.514491	2.63436	-1.02179	-0.101524	-0.731472	0.00553778	-0.602284	-0.489471	-0.871611	1.09515	1	Neuro system
TRNP1	ENSMMUG00000021031	0.941933	1.21841	1.1838	2.38844	-0.644284	-0.668987	-0.706272	-0.221132	-0.576565	-0.68985	-0.573521	-0.669828	-0.343353	-0.638789	1	Neuro system
NUDC	ENSMMUG00000010290	0.422762	0.28638	1.88065	2.01886	-0.0782953	-0.65673	-0.812215	0.376407	-0.776934	-0.0533818	0.127648	-0.347999	-0.809698	-1.57745	1	Neuro system
Metazoa_SRP	ENSMMUG00000055712	-0.544744	-0.544744	-0.544744	3.28586	0.157267	-0.544744	-0.544744	-0.0159707	-0.0893504	0.0880502	0.122369	0.264988	-0.544744	-0.544744	1	Neuro system
U3	ENSMMUG00000054753	-0.674506	0.446172	1.97928	2.20641	-0.674506	-0.0566002	-0.674506	-0.674506	-0.674506	0.277319	-0.674506	0.543462	-0.674506	-0.674506	1	Neuro system
Metazoa_SRP	ENSMMUG00000062268	-0.689245	1.64454	0.23183	2.31048	0.959982	-0.689245	0.422269	-0.689245	-0.689245	-0.689245	-0.689245	-0.055147	-0.689245	-0.689245	1	Neuro system
CATSPER4	ENSMMUG00000032213	-0.747175	0.623296	-0.291694	1.72515	-0.747175	-0.747175	2.00109	0.686192	-0.659	-0.747175	-0.747175	0.977446	-0.579433	-0.747175	1	Neuro system
ZNF593	ENSMMUG00000004682	0.89091	0.347231	0.92271	0.606011	0.561537	-1.21389	1.4364	-1.3661	-1.00941	-0.279617	0.237775	0.42589	0.359971	-1.91941	1	Neuro system
EXTL1	ENSMMUG00000061744	0.262024	1.60471	1.68767	2.06555	-0.410974	-0.56216	-0.528402	-0.495652	-0.551857	-0.492417	-0.668298	-0.518019	-0.678499	-0.713683	1	Neuro system
Y_RNA	ENSMMUG00000025936	-0.378423	1.57379	-0.378423	2.96728	-0.378423	-0.378423	-0.378423	-0.378423	-0.378423	-0.378423	-0.378423	-0.378423	-0.378423	-0.378423	1	Neuro system
NCMAP	ENSMMUG00000057675	-0.370119	3.34896	-0.370119	-0.370119	-0.283949	-0.370119	-0.370119	-0.312425	-0.30801	-0.370119	0.648907	-0.336988	-0.192887	-0.342896	1	Neuro system
-	ENSMMUG00000054190	-0.571438	0.341114	2.05832	2.30162	-0.572199	-0.784274	-0.784274	-0.784274	-0.509128	0.362715	-0.582742	-0.29504	0.000869142	-0.181276	1	Neuro system
-	ENSMMUG00000056846	0.826624	-0.393734	-0.280548	3.29249	-0.393734	-0.393734	-0.393734	-0.393734	-0.306088	-0.150157	-0.393734	-0.315813	-0.310367	-0.393734	1	Neuro system
Metazoa_SRP	ENSMMUG00000055596	0.31343	-0.370746	-0.370746	3.34919	-0.370746	-0.370746	-0.370746	-0.370746	-0.370746	-0.370746	-0.370746	0.415593	-0.370746	-0.370746	1	Neuro system
-	ENSMMUG00000059457	-0.519696	-0.312509	-0.192614	3.03108	-0.519696	-0.519696	-0.519696	-0.519696	0.240133	-0.167755	-0.519696	1.2817	-0.519696	-0.242161	1	Neuro system
Metazoa_SRP	ENSMMUG00000061389	-0.350138	-0.350138	-0.350138	3.26313	-0.350138	-0.350138	-0.350138	-0.350138	0.938531	-0.350138	-0.350138	-0.350138	-0.350138	-0.350138	1	Neuro system
WNT4	ENSMMUG00000061414	-0.817657	2.947	-0.240436	0.800471	-0.489922	-0.708005	-0.0377523	-0.232842	-0.261583	-0.338155	-0.790856	-0.105395	0.941922	-0.666785	1	Neuro system
LDLRAD2	ENSMMUG00000014826	-0.621296	-0.209249	1.98066	2.20336	-0.621296	-0.621296	-0.621296	-0.621296	-0.11759	0.0786306	-0.621296	-0.621296	-0.621296	1.03456	1	Neuro system
SH2D5	ENSMMUG00000008847	2.70429	0.719104	-0.0891983	1.63735	-0.531375	-0.517019	-0.535062	-0.465836	-0.461458	-0.498513	-0.499868	-0.513035	-0.511232	-0.438151	1	Neuro system
FAM43B	ENSMMUG00000050796	1.19613	0.550177	0.0046603	2.99169	-0.386444	-0.477442	-0.288313	-0.519384	-0.405293	-0.542072	-0.542072	-0.51891	-0.542072	-0.520661	1	Neuro system
Metazoa_SRP	ENSMMUG00000061927	-0.338493	0.731817	-0.338493	3.33009	-0.338493	-0.338493	-0.338493	-0.338493	-0.338493	-0.338493	-0.338493	-0.338493	-0.338493	-0.338493	1	Neuro system
CAMK2N1	ENSMMUG00000063102	3.03129	-0.0361106	-0.00509191	-0.102523	-0.716269	-0.715765	-0.705795	0.155389	-0.0493128	-0.284203	-0.389261	1.09164	-0.553847	-0.720146	1	Neuro system
VWA5B1	ENSMMUG00000006022	-0.391182	1.89226	-0.271105	2.7457	-0.438104	-0.45367	-0.406461	-0.148823	-0.433475	-0.397545	-0.438878	-0.417761	-0.45367	-0.387281	1	Neuro system
UBXN10	ENSMMUG00000038517	0.746683	-0.0242671	0.885183	2.25972	-0.745633	-0.813212	-0.608257	-0.813212	0.940324	-0.813212	-0.813212	-0.579366	-0.729815	1.10828	1	Neuro system
PLA2G2E	ENSMMUG00000053964	-0.602208	0.195552	-0.602208	2.13219	-0.602208	-0.602208	0.15769	-0.602208	-0.602208	2.10804	0.826407	-0.602208	-0.602208	-0.602208	1	Neuro system
HTR6	ENSMMUG00000063749	2.09285	-0.0855946	-0.469167	1.77721	-0.393563	-0.804492	-0.383957	-0.55011	-0.132446	0.311304	-1.19572	1.0301	-1.17307	-0.023341	1	Neuro system
-	ENSMMUG00000032231	0.493844	1.11763	-0.512475	1.73106	-0.449687	-0.894283	-0.772626	1.74823	-0.824248	-0.611166	-1.19403	0.6961	0.230738	-0.759078	1	Neuro system
Metazoa_SRP	ENSMMUG00000053934	-0.0904034	0.521598	-0.372101	3.37185	-0.372101	-0.372101	-0.372101	-0.372101	-0.250712	-0.203425	-0.372101	-0.372101	-0.372101	-0.372101	1	Neuro system
PADI2	ENSMMUG00000001616	-0.522472	1.23802	-0.0552433	0.892882	-0.706252	-0.704892	1.94972	-0.609581	-0.704932	-0.547042	-0.704975	-0.583266	1.76033	-0.702302	1	Neuro system
ATP13A2	ENSMMUG00000001610	-0.0533382	0.600333	1.34968	2.57042	-0.515237	-0.734367	-0.678996	0.0187805	-0.573587	0.781328	-0.848058	-0.464159	-0.647549	-0.805257	1	Neuro system
CROCC	ENSMMUG00000007315	-0.279002	0.275407	1.66057	2.71865	-0.48835	-0.7188	-0.536847	0.0689275	-0.459403	0.0797846	-0.678856	-0.505933	-0.755145	-0.381002	1	Neuro system
-	ENSMMUG00000047409	0.0764716	0.194885	1.37487	2.91998	-0.271495	-0.58733	-0.622824	0.0431481	-0.532199	-0.276781	-0.672419	-0.468352	-0.644003	-0.533953	1	Neuro system
-	ENSMMUG00000060644	3.21854	0.0459531	0.569242	-0.0603644	-0.0607171	-0.611321	-0.521929	-0.290865	-0.0253539	-0.0686052	-0.993344	-0.294116	-0.245245	-0.661874	1	Neuro system
SRARP	ENSMMUG00000001911	-0.5024	2.23692	1.31999	1.83122	-0.216533	-0.151528	-0.598146	-0.454425	-0.47437	-0.598146	-0.598146	-0.598146	-0.598146	-0.598146	1	Neuro system
PLEKHM2	ENSMMUG00000016281	1.33727	0.341837	1.97495	1.10246	-0.257769	-0.757093	0.67101	0.0119476	-0.957963	0.390985	-1.00061	-0.812236	-0.839567	-1.20523	1	Neuro system
-	ENSMMUG00000050642	-0.0362282	2.25406	-0.136924	1.56305	-0.64554	0.0650143	-0.64554	-0.64554	-0.64554	-0.64554	-0.64554	1.45534	-0.64554	-0.64554	1	Neuro system
C1H1orf158	ENSMMUG00000021870	-0.377178	0.147072	0.450444	3.3664	-0.377178	-0.377178	-0.377178	-0.377178	-0.270367	-0.377178	-0.298943	-0.377178	-0.377178	-0.377178	1	Neuro system
Metazoa_SRP	ENSMMUG00000049931	-0.305633	-0.305633	-0.305633	3.43901	-0.305633	-0.305633	-0.305633	-0.305633	0.228578	-0.305633	-0.305633	-0.305633	-0.305633	-0.305633	1	Neuro system
-	ENSMMUG00000052115	-0.320071	2.39779	-0.0923119	2.11432	-0.660277	-0.660277	-0.317579	0.105729	0.21933	-0.354712	-0.660277	-0.660277	-0.45111	-0.660277	1	Neuro system
MIIP	ENSMMUG00000032248	-0.646603	1.00912	1.88521	1.96211	-0.521575	-0.860849	-0.290418	0.00598346	-0.596692	0.814241	-0.775081	-0.372008	-0.841658	-0.77178	1	Neuro system
Metazoa_SRP	ENSMMUG00000062316	-1.04858	-0.6007	1.53346	1.78058	0.977671	0.663013	-0.431489	0.631389	-0.170153	0.473677	-0.968463	-0.652245	-0.978494	-1.20967	1	Neuro system
-	ENSMMUG00000051669	1.32299	-0.538972	0.0136495	3.06055	-0.415285	-0.49072	-0.455612	-0.290534	-0.21803	-0.241661	-0.421434	-0.348751	-0.437214	-0.538972	1	Neuro system
DRAXIN	ENSMMUG00000057353	-0.418858	0.21033	1.50015	2.74016	-0.61365	-0.386492	-0.61365	-0.61365	-0.61365	0.436095	-0.61365	-0.61365	-0.61365	0.214162	1	Neuro system
FBXO44	ENSMMUG00000032251	0.59316	0.793744	2.43644	1.65264	-0.49524	-0.579768	-0.64154	-0.455838	-0.158501	-0.298692	-0.749469	-0.625286	-0.738509	-0.733139	1	Neuro system
FBXO2	ENSMMUG00000002261	-0.025593	0.794927	0.274943	3.22763	-0.460961	-0.465154	-0.465355	-0.366091	-0.234647	-0.446197	-0.46603	-0.449199	-0.465074	-0.453202	1	Neuro system
-	ENSMMUG00000062201	0.373771	2.22787	1.42982	1.60337	-0.597894	-0.597894	-0.597894	-0.597894	-0.597894	-0.597894	-0.597894	-0.597894	-0.597894	-0.253784	1	Neuro system
Metazoa_SRP	ENSMMUG00000059404	3.4744	-0.267261	-0.267261	-0.267261	-0.267261	-0.267261	-0.267261	-0.267261	-0.267261	-0.267261	-0.267261	-0.267261	-0.267261	-0.267261	1	Neuro system
SRM	ENSMMUG00000019321	-0.214468	0.508416	1.78498	1.57351	0.510529	-0.74582	0.525064	-0.67646	-1.39637	1.09994	-0.58231	-1.03114	-0.64632	-0.709549	1	Neuro system
Metazoa_SRP	ENSMMUG00000062550	-0.405381	-0.0494859	1.97013	2.39883	-0.302656	-0.335863	-0.507677	-0.352749	-0.688544	-0.0722017	-0.62568	0.618796	-0.82376	-0.82376	1	Neuro system
LZIC	ENSMMUG00000013292	-0.283611	0.068982	-0.194635	2.48013	-0.338829	-0.428538	-1.02669	-0.160392	0.877247	-0.216596	-1.13571	0.699344	0.990295	-1.331	1	Neuro system
-	ENSMMUG00000059651	-0.53444	1.025	-0.245238	2.83104	-0.32572	-0.639364	-0.507249	1.21122	-0.401993	-0.403764	-0.490338	-0.458478	-0.607109	-0.453574	1	Neuro system
mml-mir-34a	ENSMMUG00000026899	-0.712979	-0.25463	-0.230589	2.16724	-0.425065	-0.207542	-0.712979	2.32312	0.0340975	0.325124	-0.576178	-0.712979	-0.712979	-0.303663	1	Neuro system
-	ENSMMUG00000051978	0.107124	-0.393856	0.111865	3.18038	-0.243963	-0.309438	-0.629073	-0.461638	0.262179	0.549071	-0.443552	-0.153759	-0.552641	-1.0227	1	Neuro system
Metazoa_SRP	ENSMMUG00000049752	-0.732132	-0.292206	-0.00606451	2.41343	-0.291365	-0.0599735	-0.796865	2.0528	0.046696	0.0727095	-0.496672	-0.405454	-0.933495	-0.571406	1	Neuro system
Metazoa_SRP	ENSMMUG00000058703	0.77277	2.26646	-0.566821	1.86101	0.76798	-0.566821	-0.566821	-0.566821	-0.566821	-0.566821	-0.566821	-0.566821	-0.566821	-0.566821	1	Neuro system
Metazoa_SRP	ENSMMUG00000057249	-1.1113	-0.595961	-0.0265611	2.71584	-0.463875	-0.543018	-0.784046	1.32699	-0.481325	0.347675	-0.64987	0.568932	-0.112595	-0.190881	1	Neuro system
CHD5	ENSMMUG00000016838	1.81858	0.521476	1.82478	1.64405	-0.590099	-0.597165	-0.606129	-0.594222	-0.604727	-0.549304	-0.610413	-0.571554	-0.602448	-0.48283	1	Neuro system
KCNAB2	ENSMMUG00000016837	1.86336	0.793092	1.37835	1.51807	-0.146069	-0.656118	-0.869856	-0.240411	-0.841805	0.393926	-0.811329	-0.696428	-0.81192	-0.872874	1	Neuro system
-	ENSMMUG00000056766	1.39102	-0.593838	1.85374	1.85938	-0.4846	-0.858115	-0.858115	0.642371	-0.53505	-0.184741	-0.739799	-0.283676	-0.704468	-0.504107	1	Neuro system
AJAP1	ENSMMUG00000059970	0.928421	1.84502	1.4466	1.11716	-0.227108	-0.772387	-0.862379	0.875206	-0.609711	-0.580433	-0.883722	-0.66784	-0.85729	-0.751541	1	Neuro system
-	ENSMMUG00000057939	-0.853834	-0.0435957	0.425271	2.84905	-0.344879	-0.853834	-0.0820498	-0.470476	-0.853834	0.981256	-0.853834	-0.266782	-0.225751	0.593289	1	Neuro system
Metazoa_SRP	ENSMMUG00000057775	-0.675002	-0.675002	0.117092	2.76455	-0.202242	-0.675002	0.280863	-0.675002	-0.675002	1.02959	-0.225744	0.960908	-0.675002	-0.675002	1	Neuro system
LRRC47	ENSMMUG00000032284	-0.212816	-0.428992	1.8943	1.97148	0.690738	-0.427182	0.515615	0.361198	-0.77054	0.0331387	-1.32986	-0.531934	-1.0157	-0.749449	1	Neuro system
TTC34	ENSMMUG00000048622	-0.103448	0.26899	-0.473572	3.14703	-0.0265955	-0.553507	-0.738712	-0.381122	-0.533401	0.545094	-0.738712	-0.464916	-0.445779	0.498652	1	Neuro system
MMEL1	ENSMMUG00000012381	-0.827237	1.19093	0.397133	1.25183	0.52529	2.20396	-0.963024	-0.759199	0.265753	-0.231259	-0.705873	-0.806961	-0.963024	-0.578318	1	Neuro system
PRXL2B	ENSMMUG00000012380	0.0888644	0.348024	1.56381	2.79558	-0.573875	-0.706733	-0.791649	-0.49451	-0.334166	-0.288504	-0.517838	-0.179194	-0.478821	-0.430983	1	Neuro system
HES5	ENSMMUG00000063558	0.925377	1.65101	0.714673	2.36273	-0.57817	-0.61243	-0.331473	-0.352267	-0.634344	-0.634344	-0.634344	-0.634344	-0.634344	-0.607724	1	Neuro system
FAAP20	ENSMMUG00000018916	-0.241227	0.262498	0.217928	3.22971	0.350243	-0.128518	-0.469765	-0.685806	-0.536791	0.119008	-0.727146	-0.629192	-0.225943	-0.534996	1	Neuro system
Metazoa_SRP	ENSMMUG00000062804	-0.930346	-0.123427	0.48506	2.14275	-0.25452	-0.63374	-0.759541	1.99669	-0.711142	0.74493	-0.609231	-0.832905	-0.304836	-0.209748	1	Neuro system
FNDC10	ENSMMUG00000040063	0.059864	1.22337	0.825259	2.77015	-0.410589	-0.719366	-0.749479	-0.515412	-0.559813	-0.426945	-0.768087	-0.459732	-0.520844	0.251631	1	Neuro system
-	ENSMMUG00000051354	0.271532	-0.12555	1.78696	2.74003	-0.504146	-0.434564	-0.444041	-0.504146	-0.349875	-0.504146	-0.504146	-0.504146	-0.504146	-0.419622	1	Neuro system
-	ENSMMUG00000050086	-0.784168	0.993064	1.81338	1.95687	-0.418625	-0.773681	-0.885148	0.90845	0.0956132	-0.298971	-0.636292	-0.397449	-0.780411	-0.792623	1	Neuro system
AURKAIP1	ENSMMUG00000059208	0.617169	-0.504664	1.38966	2.75986	-0.0290964	-0.635465	-0.508432	-0.12844	-0.543869	0.0355552	-0.763146	-0.124896	-0.68639	-0.877842	1	Neuro system
B3GALT6	ENSMMUG00000019519	1.05943	1.03076	1.90255	1.66518	-0.426105	-0.792218	-0.277495	-0.811058	-0.926456	-0.690768	-0.903862	-0.558623	-0.570003	0.298668	1	Neuro system
-	ENSMMUG00000059172	-0.382302	-0.124518	0.379517	1.38121	-0.435453	-0.521769	-0.759151	2.61944	-0.389048	0.7679	-0.830023	-0.0944015	-1.07932	-0.532083	1	Neuro system
TTLL10	ENSMMUG00000045769	-0.676169	0.237619	-0.207331	2.88118	-0.540618	-0.452138	-0.734222	0.0847134	-0.263915	1.44801	-0.534713	-0.389848	-0.169896	-0.682674	1	Neuro system
-	ENSMMUG00000065097	-0.0400205	0.0944111	1.04633	1.53781	-0.873548	-1.09212	-1.11468	-0.892206	-0.129556	-0.200476	-0.354536	0.375089	2.21128	-0.567768	1	Neuro system
AGRN	ENSMMUG00000000838	-0.402429	0.690356	-0.401002	2.30212	-0.187984	-0.735428	-0.932567	1.93347	0.338032	-0.236801	-0.829696	-0.325281	-0.698028	-0.514752	1	Neuro system
NOC2L	ENSMMUG00000015800	-0.387074	-0.139193	1.66643	1.73488	-0.0127379	-0.713543	-0.155541	0.553896	-0.721298	1.63077	-0.897587	-0.70904	-0.877674	-0.972282	1	Neuro system
SAMD11	ENSMMUG00000005947	-0.260155	0.58925	-0.0792707	3.09759	-0.361835	-0.555806	-0.586391	-0.431097	-0.504387	0.79394	-0.579131	0.124569	-0.605075	-0.642203	1	Neuro system
-	ENSMMUG00000054477	1.7116	-0.403394	2.15818	1.52567	-0.498164	-0.564576	-0.658258	-0.17591	-0.658258	-0.513949	-0.620225	-0.612093	-0.658258	-0.0323598	1	Neuro system
TNK2	ENSMMUG00000000972	0.135409	0.566067	1.57084	2.67838	-0.600785	-0.678418	-0.577123	-0.260971	-0.604945	0.0841899	-0.709037	-0.327846	-0.654371	-0.621393	1	Neuro system
-	ENSMMUG00000064126	-0.441149	0.180132	1.91796	2.18961	0.232482	0.327664	-0.571969	-0.44057	0.499578	-0.52411	-0.741586	-0.475558	-1.08894	-1.06355	1	Neuro system
-	ENSMMUG00000052546	2.7312	-0.136808	-0.417411	1.89591	-0.401584	-0.384969	-0.44982	-0.352185	-0.372576	-0.499122	-0.452778	-0.161607	-0.499122	-0.499122	1	Neuro system
-	ENSMMUG00000058695	2.95087	0.171527	0.293208	1.33942	-0.551618	-0.316459	-0.477589	-0.381038	-0.348552	-0.600088	-0.530998	-0.348507	-0.600088	-0.600088	1	Neuro system
Metazoa_SRP	ENSMMUG00000045268	-0.862449	-0.257813	-0.0201924	2.1009	-0.30488	0.152605	-0.225928	2.08149	-0.438753	0.311424	-0.939929	0.376412	-0.90032	-1.07257	1	Neuro system
Metazoa_SRP	ENSMMUG00000054597	1.51731	-0.709845	-0.709845	1.9811	0.0298841	-0.709845	1.53362	-0.709845	-0.709845	0.623742	-0.00688963	-0.709845	-0.709845	-0.709845	1	Neuro system
FBXO45	ENSMMUG00000054814	0.889798	0.65053	2.09992	1.8773	-0.575528	-0.818079	-0.510782	-0.768054	-0.876409	-0.133637	-0.822544	-0.168231	-0.698391	-0.14589	1	Neuro system
Metazoa_SRP	ENSMMUG00000052342	1.31993	-0.818871	0.966467	2.57288	-0.0196891	-0.195326	-0.549563	-0.417561	-0.473252	-0.338615	-0.818871	0.410213	-0.818871	-0.818871	1	Neuro system
Metazoa_SRP	ENSMMUG00000064433	3.4744	-0.267261	-0.267261	-0.267261	-0.267261	-0.267261	-0.267261	-0.267261	-0.267261	-0.267261	-0.267261	-0.267261	-0.267261	-0.267261	1	Neuro system
Metazoa_SRP	ENSMMUG00000063476	-0.225521	0.293026	0.196733	3.22263	-0.458879	-0.613099	-0.657112	0.4064	-0.475859	0.204498	-0.596212	-0.232435	-0.60888	-0.455294	1	Neuro system
ATP13A5	ENSMMUG00000009760	-0.312545	3.36092	-0.128141	-0.299443	-0.250482	-0.317481	0.584932	-0.358518	-0.386133	-0.372914	-0.382649	-0.386133	-0.386133	-0.365284	1	Neuro system
-	ENSMMUG00000056150	-0.269866	3.35489	-0.288107	-0.280221	-0.380241	-0.251527	0.620407	-0.380241	-0.380241	-0.380241	-0.380241	-0.380241	-0.380241	-0.223887	1	Neuro system
-	ENSMMUG00000045578	-0.543753	0.167439	-0.263067	0.0656657	-0.376226	-0.347689	-0.543753	-0.291382	-0.326404	0.664319	-0.384554	-0.543753	-0.543753	3.26691	1	Neuro system
Metazoa_SRP	ENSMMUG00000057195	-0.890632	-0.158943	0.408857	3.02801	0.143499	-0.386345	-0.890632	0.27777	-0.443406	0.662981	-0.399271	0.00397864	-0.465237	-0.890632	1	Neuro system
-	ENSMMUG00000063957	0.160423	3.25634	0.354423	0.43689	-0.609095	-0.609095	-0.221517	-0.320321	-0.609095	-0.263513	-0.426933	-0.166883	-0.372535	-0.609095	1	Neuro system
-	ENSMMUG00000051294	-0.559243	-0.542758	0.908669	2.96354	-0.465069	-0.400202	-0.845865	-0.415626	0.389246	0.355513	-0.574466	-0.29683	0.328954	-0.845865	1	Neuro system
Metazoa_SRP	ENSMMUG00000053913	0.448763	-0.717071	-0.230488	2.98053	0.444594	-0.717071	-0.717071	-0.279573	-0.717071	0.85362	-0.717071	-0.382092	-0.358679	0.108677	1	Neuro system
SUSD5	ENSMMUG00000007627	1.00767	2.85088	0.120706	0.341099	-0.466575	-0.201296	-0.743793	0.691853	-0.51374	-0.573847	-0.839943	-0.74669	-0.737704	-0.188617	1	Neuro system
-	ENSMMUG00000058588	1.66056	-0.759765	-0.858758	2.03066	0.326487	-0.425645	-0.706341	0.701234	0.744913	0.486492	-0.665461	-0.725148	-0.650698	-1.15853	1	Neuro system
-	ENSMMUG00000054962	-0.297744	0.503485	-0.0231846	3.37174	-0.321557	-0.332995	-0.367831	-0.379888	-0.415129	-0.246436	-0.415129	-0.307198	-0.38626	-0.381872	1	Neuro system
-	ENSMMUG00000055585	-0.613857	-0.351165	1.06293	2.22891	-0.403351	0.737825	-0.0713518	-0.93397	-0.150211	1.43088	-0.951211	-0.395465	-0.335421	-1.25454	1	Neuro system
-	ENSMMUG00000060127	-0.397239	-0.334929	-0.0101636	3.31708	-0.213433	-0.466795	-0.348879	-0.489788	0.209543	-0.046357	-0.628859	0.382725	-0.344047	-0.628859	1	Neuro system
-	ENSMMUG00000052172	-0.198128	-0.153994	0.315584	2.85893	-0.200872	-0.741753	-0.385745	0.186357	0.770498	0.757545	-0.783816	-0.965461	-0.493685	-0.965461	1	Neuro system
Metazoa_SRP	ENSMMUG00000037957	-0.314235	-0.314235	-0.314235	3.41928	-0.314235	-0.314235	-0.314235	-0.314235	0.351543	-0.314235	-0.314235	-0.314235	-0.314235	-0.314235	1	Neuro system
-	ENSMMUG00000058867	0.0836075	-0.300751	-0.0211175	3.37739	-0.227959	-0.456886	-0.26626	-0.441414	-0.0107448	0.163783	-0.407703	-0.362041	-0.508609	-0.621291	1	Neuro system
EFHB	ENSMMUG00000018836	0.651932	0.00051781	0.0304029	2.59558	-0.581678	-0.683772	-0.705714	1.64095	-0.549495	-0.548696	-0.755392	0.0566536	-0.595969	-0.555317	1	Neuro system
-	ENSMMUG00000054204	1.57051	-0.221672	0.393808	2.77615	-0.0984575	-0.525693	-0.498882	-0.702398	0.0158569	-0.430201	-0.702398	-0.296041	-0.578181	-0.702398	1	Neuro system
Metazoa_SRP	ENSMMUG00000051521	-0.662125	0.569522	-0.11407	2.49063	-0.387008	0.161448	1.49606	-0.175296	0.0507354	-1.13438	-0.923948	0.174666	-0.451191	-1.09503	1	Neuro system
-	ENSMMUG00000065285	2.27689	-0.329869	0.0691253	2.36631	-0.492802	-0.591353	-0.591353	-0.368659	-0.335632	-0.413684	-0.216744	-0.250332	-0.530544	-0.591353	1	Neuro system
-	ENSMMUG00000059947	-0.0576981	-0.15357	0.00333127	3.31801	-0.418449	-0.177917	-0.537401	-0.327587	0.565969	-0.382232	-0.541029	-0.390919	-0.302655	-0.597859	1	Neuro system
Metazoa_SRP	ENSMMUG00000053660	1.92887	-0.449544	-0.449544	2.6854	-0.449544	-0.449544	-0.449544	-0.449544	-0.449544	-0.449544	-0.449544	-0.201038	0.082205	-0.449544	1	Neuro system
RAB6B	ENSMMUG00000008919	0.77199	1.6401	1.96774	1.31958	-0.783621	-0.754159	-0.752309	0.168731	-0.470793	-0.71604	-0.844895	-0.369163	-0.436534	-0.740622	1	Neuro system
-	ENSMMUG00000054372	-0.699459	-0.346535	-0.319503	2.96547	-0.0525751	-0.672467	-0.534632	0.113469	1.02814	-0.570093	-0.861907	0.445022	0.136861	-0.631787	1	Neuro system
MRAS	ENSMMUG00000041198	0.414457	2.40102	1.37029	1.24703	-0.454958	-0.617066	-0.531894	-0.538702	-0.0464324	-0.130929	-0.793	-0.849975	-0.832089	-0.637747	1	Neuro system
Metazoa_SRP	ENSMMUG00000064640	2.57819	-0.0468044	0.278213	0.354102	-0.0792505	-0.608459	-0.608459	1.78323	-0.608459	-0.608459	-0.608459	-0.608459	-0.608459	-0.608459	1	Neuro system
FOXL2	ENSMMUG00000053063	0.118603	2.07014	-0.182181	2.30839	-0.55959	-0.55959	-0.55959	-0.55959	-0.55959	-0.55959	-0.55959	-0.55959	-0.55959	0.72136	1	Neuro system
SPSB4	ENSMMUG00000053344	-0.453653	1.18629	-0.535361	2.95082	-0.530233	-0.447474	0.712468	-0.500826	-0.315955	-0.280357	-0.738783	-0.190699	-0.314179	-0.542061	1	Neuro system
CHST2	ENSMMUG00000002779	-0.060512	1.48996	1.55324	1.35733	-0.712508	-0.856266	-0.947277	1.08568	-0.144687	0.595992	-0.8929	-0.817563	-0.806014	-0.844464	1	Neuro system
-	ENSMMUG00000051153	0.189418	-0.258815	0.0862044	3.31487	-0.415905	-0.50464	-0.503424	0.246029	-0.458694	0.143014	-0.576488	-0.301065	-0.330944	-0.629566	1	Neuro system
-	ENSMMUG00000057236	0.578964	-0.370168	0.359727	3.26163	0.0137437	-0.425829	-0.580335	-0.480896	-0.366236	-0.223332	-0.298062	-0.389991	-0.498876	-0.580335	1	Neuro system
-	ENSMMUG00000062595	-0.261679	-0.402902	-0.402902	3.43631	-0.121466	-0.402902	-0.402902	0.0210678	-0.0377679	-0.149215	-0.402902	-0.240591	-0.229247	-0.402902	1	Neuro system
U6	ENSMMUG00000025640	0.957239	-0.589327	-0.589327	2.21361	-0.589327	-0.589327	-0.589327	-0.589327	1.41001	-0.589327	-0.589327	-0.589327	1.31241	-0.589327	1	Neuro system
-	ENSMMUG00000049332	-0.282985	-0.323203	-0.188919	3.46701	-0.283129	-0.323203	-0.282691	-0.202465	-0.21922	-0.106468	-0.285121	-0.323203	-0.323203	-0.323203	1	Neuro system
-	ENSMMUG00000059788	-0.397475	0.23477	-0.104907	1.97787	-0.183939	-1.12365	-0.500002	0.0936637	-1.09607	1.75259	-0.965161	0.750267	0.631153	-1.0691	1	Neuro system
-	ENSMMUG00000031537	-0.632483	1.38476	0.163661	2.82466	-0.632483	-0.076362	-0.152107	-0.632483	-0.632483	-0.632483	-0.180928	0.4637	-0.632483	-0.632483	1	Neuro system
-	ENSMMUG00000061194	-0.322501	-0.115706	-0.714837	2.80101	0.408882	-0.691317	-0.761571	0.120751	-0.444722	0.911669	-0.927909	0.826303	-0.300643	-0.78941	1	Neuro system
GPR149	ENSMMUG00000056924	0.250302	3.17441	0.652552	0.320276	-0.550152	-0.550152	-0.550152	-0.550152	-0.550152	-0.550152	-0.550152	0.00183503	-0.451724	-0.0965899	1	Neuro system
-	ENSMMUG00000062803	0.683143	-0.041319	0.99218	3.01705	-0.515727	-0.488608	-0.473749	-0.674928	-0.261833	-0.172662	-0.599285	-0.261759	-0.527579	-0.674928	1	Neuro system
SHOX2	ENSMMUG00000019030	-0.551105	0.771808	-0.551105	2.107	-0.422158	-0.24928	2.31677	-0.486354	-0.551105	-0.24115	-0.551105	-0.551105	-0.551105	-0.489999	1	Neuro system
Metazoa_SRP	ENSMMUG00000052096	-0.0938341	-0.0411417	0.519506	2.31081	-1.00998	0.0583924	0.835738	-1.00998	0.174376	-1.00998	-1.00998	0.0429664	1.24311	-1.00998	1	Neuro system
-	ENSMMUG00000054173	-0.557117	0.484922	1.45476	1.68122	-1.19104	-0.451785	0.0860956	-1.19104	-0.781286	-0.0522864	-0.890914	1.72329	-0.0217815	-0.293038	1	Neuro system
-	ENSMMUG00000064893	1.74135	2.01247	-0.374258	0.348625	-0.590537	-0.590537	-0.590537	-0.590537	1.58665	-0.590537	-0.590537	-0.590537	-0.590537	-0.590537	1	Neuro system
PPM1L	ENSMMUG00000003540	-0.299295	0.251463	2.12927	2.00869	0.244923	-0.070483	0.00120659	-0.66465	-0.477933	0.0150786	-0.972643	-0.859484	0.0559581	-1.3621	1	Neuro system
Metazoa_SRP	ENSMMUG00000055530	3.1356	0.516211	-0.617899	-0.617899	0.450695	0.00741249	-0.617899	-0.617899	0.0752965	-0.617899	-0.617899	-0.00161623	-0.617899	0.141691	1	Neuro system
-	ENSMMUG00000053615	-0.0287911	-0.267022	-0.0970249	3.44945	-0.359392	-0.393525	-0.400083	-0.255744	-0.121419	-0.219168	-0.324387	-0.25186	-0.289363	-0.441673	1	Neuro system
Metazoa_SRP	ENSMMUG00000063475	-0.593842	0.79384	1.59686	1.78436	-0.593842	-0.593842	-0.593842	-0.593842	-0.593842	1.76336	-0.593842	-0.593842	-0.593842	-0.593842	1	Neuro system
CLDN11	ENSMMUG00000059260	-0.306326	2.51935	0.112605	2.13174	-0.45426	-0.446652	-0.48336	-0.47063	-0.379045	-0.473825	-0.464495	-0.426562	-0.486805	-0.371735	1	Neuro system
-	ENSMMUG00000059352	-0.519193	0.0253279	-0.152407	2.79646	-0.222152	-0.585779	-0.517001	-0.668677	1.63116	-0.460083	-0.157361	0.098572	-0.450485	-0.818373	1	Neuro system
GHSR	ENSMMUG00000004194	-0.434986	-0.119361	-0.434986	2.81051	-0.28629	-0.434986	-0.284663	-0.434986	-0.434986	-0.434986	-0.434986	1.79468	-0.434986	-0.434986	1	Neuro system
-	ENSMMUG00000059662	0.236478	-0.269649	-0.0896011	3.27029	-0.417918	-0.313929	-0.514926	-0.433574	0.687044	-0.287167	-0.364106	-0.468071	-0.50039	-0.534478	1	Neuro system
PEX5L	ENSMMUG00000003595	1.24594	2.71132	0.695031	0.723251	-0.547701	-0.497312	-0.128041	-0.60044	-0.611172	-0.588541	-0.622573	-0.551194	-0.614189	-0.614377	1	Neuro system
-	ENSMMUG00000050512	-0.256515	0.456631	0.0322274	3.37874	-0.365973	-0.387771	-0.387771	-0.338515	-0.359491	-0.368122	-0.387771	-0.324914	-0.333971	-0.356782	1	Neuro system
-	ENSMMUG00000049713	0.0622264	-0.536823	-0.339964	3.28154	0.575631	-0.326199	-0.193476	-0.369027	0.152768	-0.163064	-0.464664	-0.528902	-0.52197	-0.628074	1	Neuro system
-	ENSMMUG00000057005	-0.0258507	0.0474092	0.379686	3.37407	-0.322103	-0.39794	-0.424573	-0.328803	-0.331248	-0.457583	-0.428146	-0.280248	-0.320533	-0.48414	1	Neuro system
-	ENSMMUG00000052013	0.13665	2.29284	0.428597	2.22553	-0.524995	-0.517815	-0.523776	-0.510023	-0.495252	-0.466007	-0.521655	-0.513811	-0.490877	-0.519407	1	Neuro system
-	ENSMMUG00000063380	-0.00640603	2.44665	1.20753	1.32032	-0.625773	-0.619206	-0.630671	-0.623292	-0.630671	-0.595351	-0.630671	-0.591125	0.60237	-0.623708	1	Neuro system
-	ENSMMUG00000056463	0.483751	2.83535	0.919919	1.04387	-0.528289	-0.528289	-0.528289	-0.528289	-0.528289	-0.528289	-0.528289	-0.528289	-0.528289	-0.528289	1	Neuro system
Metazoa_SRP	ENSMMUG00000063656	0.992835	-0.401582	1.07514	1.67386	-0.902729	-0.902729	1.48408	-0.547058	-0.290103	-0.47709	-0.902729	1.00356	-0.902729	-0.902729	1	Neuro system
-	ENSMMUG00000053420	0.454212	0.47286	2.51428	1.83966	-0.594881	-0.581534	-0.363296	-0.439868	-0.566089	-0.550994	-0.604837	-0.398145	-0.604837	-0.576531	1	Neuro system
Metazoa_SRP	ENSMMUG00000062611	0.0776761	-0.147943	-0.10257	2.94038	-0.197916	-1.01299	-1.01299	-0.6037	-0.660499	-0.0333774	1.05249	-0.386227	0.328149	-0.240483	1	Neuro system
Metazoa_SRP	ENSMMUG00000050612	-0.385879	-0.385879	-0.385879	3.30441	-0.385879	-0.385879	-0.385879	-0.385879	0.491547	-0.385879	-0.385879	-0.385879	0.448715	-0.385879	1	Neuro system
-	ENSMMUG00000051858	-0.853147	2.09798	-0.491622	1.23335	-0.8537	-0.827465	-1.00771	1.54446	0.191195	0.380577	-0.861356	0.235819	-0.437522	-0.350844	1	Neuro system
Metazoa_SRP	ENSMMUG00000064748	-0.272981	-0.244128	1.73788	1.49833	-0.77464	-0.77464	-0.521973	-0.0216171	-0.77464	-0.77464	-0.299625	2.1082	-0.466207	-0.419321	1	Neuro system
DCLK3	ENSMMUG00000006812	-0.307039	3.44079	0.181834	-0.224313	-0.347987	-0.355649	-0.341731	-0.234037	-0.330079	-0.18381	-0.311066	-0.329232	-0.332655	-0.325024	1	Neuro system
Metazoa_SRP	ENSMMUG00000056274	-0.342267	-0.404543	-0.111124	3.3578	0.0191943	-0.257558	-0.486936	0.222006	-0.361767	0.187104	-0.459094	-0.220659	-0.596837	-0.54532	1	Neuro system
-	ENSMMUG00000054175	0.144565	1.04437	0.109689	2.23599	-0.74651	0.366258	0.490338	-0.855868	-1.04593	0.807627	-1.18966	0.471581	-0.642784	-1.18966	1	Neuro system
-	ENSMMUG00000058662	-0.360171	0.850406	0.308978	2.922	-0.182666	-0.511981	-0.44438	-0.677714	-0.185022	-0.0538793	-0.84345	0.728972	-0.577559	-0.973532	1	Neuro system
DLEC1	ENSMMUG00000000987	-0.713121	0.751119	0.977118	0.712276	-0.58704	-0.737882	-0.541373	2.76257	-0.36857	-0.214642	-0.7611	0.0392095	-0.7572	-0.561367	1	Neuro system
Metazoa_SRP	ENSMMUG00000055867	-0.162365	-0.560937	-0.560937	2.32849	-0.560937	2.22785	0.242046	-0.560937	-0.0456802	-0.560937	-0.560937	-0.10285	-0.560937	-0.560937	1	Neuro system
MOBP	ENSMMUG00000051408	2.55265	2.02063	0.237092	0.0309332	-0.483686	-0.481765	-0.484651	-0.484651	-0.484095	-0.484651	-0.484651	-0.484651	-0.483857	-0.484651	1	Neuro system
MOBP	ENSMMUG00000009197	0.118574	2.85601	0.38795	1.5161	-0.48723	-0.485595	-0.48837	-0.48895	-0.488206	-0.48895	-0.48895	-0.487627	-0.488242	-0.486505	1	Neuro system
-	ENSMMUG00000052672	-0.139611	-0.427569	-0.214973	3.31293	-0.392381	-0.491979	-0.522298	-0.287293	-0.132372	-0.231454	-0.0936628	0.643696	-0.451897	-0.571139	1	Neuro system
-	ENSMMUG00000055812	0.147008	-0.226836	0.0551108	1.68693	-0.138141	-0.791883	-0.978458	2.05022	1.24617	0.144443	-0.853635	-0.472948	-0.947152	-0.920831	1	Neuro system
-	ENSMMUG00000050407	0.862011	1.91963	1.31839	1.47812	0.200682	-0.842404	-0.50438	-0.574411	-0.939321	-0.431905	-1.13799	-0.126158	-0.304628	-0.917646	1	Neuro system
ZBTB47	ENSMMUG00000021243	2.33923	0.363082	0.293068	2.08177	-0.0704268	-0.554973	-0.356115	-0.314629	-0.684008	-0.633288	-0.732074	-0.494358	-0.51125	-0.726031	1	Neuro system
Metazoa_SRP	ENSMMUG00000059592	-0.637555	-0.637555	-0.637555	3.02184	-0.134578	-0.637555	-0.129076	0.120156	-0.637555	0.269213	-0.637555	0.522758	-0.637555	0.792571	1	Neuro system
-	ENSMMUG00000063430	-0.351298	3.41528	-0.184865	-0.0355674	-0.422455	-0.422455	-0.279098	-0.208832	0.221467	-0.422455	-0.287699	-0.177108	-0.422455	-0.422455	1	Neuro system
Metazoa_SRP	ENSMMUG00000055463	-0.142539	-0.646835	0.573896	2.42386	-0.279655	-0.432708	-0.943186	-1.01189	-0.693893	1.67086	-0.0727113	0.324741	-0.883706	0.113767	1	Neuro system
CSPG5	ENSMMUG00000031732	1.79746	0.563475	1.44706	1.99561	-0.603069	-0.592506	-0.611979	-0.58834	-0.525548	-0.549959	-0.599582	-0.590295	-0.552272	-0.590054	1	Neuro system
-	ENSMMUG00000055794	2.20382	0.417069	-0.129022	1.04478	0.356608	-0.394978	0.542776	1.1044	-0.22899	-0.705828	-1.19769	-0.896537	-0.925817	-1.1906	1	Neuro system
PLXNB1	ENSMMUG00000003074	-0.664707	1.78711	0.500255	2.33825	0.0519613	-0.54629	-1.08705	0.267139	0.0107322	-0.315395	-0.641952	0.0103276	-0.612272	-1.09812	1	Neuro system
CAMKV	ENSMMUG00000016480	3.1429	1.00914	-0.0485865	0.347074	-0.451343	-0.435034	-0.440778	-0.446095	-0.451343	-0.438782	-0.451343	-0.447325	-0.447044	-0.441438	1	Neuro system
GPR62	ENSMMUG00000022204	-0.356783	2.09289	0.335019	2.4994	-0.35738	-0.507372	-0.397567	-0.37753	-0.523581	-0.473643	-0.523581	-0.379803	-0.506489	-0.523581	1	Neuro system
DUSP7	ENSMMUG00000005300	0.00788747	0.900021	0.441311	1.54871	-0.523177	-0.992952	0.636456	0.365713	-0.553446	1.94469	-0.995862	-0.737673	-0.808872	-1.23281	1	Neuro system
Metazoa_SRP	ENSMMUG00000060956	-0.490794	-0.490794	-0.490794	2.43626	-0.490794	-0.490794	-0.490794	-0.490794	1.59707	-0.490794	-0.490794	1.36541	-0.490794	-0.490794	1	Neuro system
Metazoa_SRP	ENSMMUG00000054852	3.35873	-0.235571	-0.408798	0.481829	-0.408798	-0.408798	-0.408798	0.0829677	-0.197037	-0.408798	-0.408798	-0.220533	-0.408798	-0.408798	1	Neuro system
Metazoa_SRP	ENSMMUG00000051466	-0.826386	-0.0795602	-0.0403878	1.52011	-0.591825	-0.689127	-0.707822	2.17713	-0.0655893	-0.826386	-0.826386	-0.014726	-0.536923	1.50788	1	Neuro system
-	ENSMMUG00000051778	-0.269104	3.44354	-0.193419	0.0276245	-0.269508	-0.382154	-0.382154	-0.382154	-0.0898596	-0.382154	-0.382154	-0.252223	-0.104128	-0.382154	1	Neuro system
U6	ENSMMUG00000060237	-0.315096	-0.315096	-0.315096	3.45025	-0.315096	-0.315096	-0.315096	-0.315096	-0.315096	-0.315096	-0.0340607	-0.315096	0.0498626	-0.315096	1	Neuro system
-	ENSMMUG00000061324	-0.782513	0.0703099	1.57357	2.50601	-0.782513	0.393034	-0.782513	-0.479883	-0.000613929	0.666141	-0.782513	-0.319083	-0.782513	-0.496916	1	Neuro system
-	ENSMMUG00000065043	-0.957787	-0.636274	0.417182	2.17734	-0.107347	-0.715204	-0.856252	-0.17885	1.45885	-0.466768	-0.0570231	1.416	-0.699262	-0.794598	1	Neuro system
FEZF2	ENSMMUG00000021592	3.47258	-0.216877	-0.280378	-0.17155	-0.280378	-0.280378	-0.280378	-0.280378	-0.280378	-0.280378	-0.280378	-0.280378	-0.280378	-0.280378	1	Neuro system
TAFA1	ENSMMUG00000013847	1.13185	3.17329	-0.0818085	-0.324596	-0.415032	-0.415032	-0.415032	-0.415032	-0.415032	-0.325395	-0.367783	-0.300331	-0.415032	-0.415032	1	Neuro system
Metazoa_SRP	ENSMMUG00000052369	-0.497201	2.21487	-0.497201	1.82676	-0.497201	-0.497201	-0.497201	1.42759	-0.497201	-0.497201	-0.497201	-0.497201	-0.497201	-0.497201	1	Neuro system
GPR27	ENSMMUG00000040565	1.66974	1.38335	0.52712	2.144	-0.433341	-0.558792	-0.715917	-0.393186	-0.523864	-0.701872	-0.747755	-0.632888	-0.427313	-0.589272	1	Neuro system
Metazoa_SRP	ENSMMUG00000049350	-0.968179	-0.124904	-0.302549	2.64482	1.01822	-0.503225	-0.566553	-0.369696	-0.452749	1.18047	-0.590649	0.406544	-0.968179	-0.403381	1	Neuro system
GRM7	ENSMMUG00000011231	1.47368	1.3266	1.20818	1.96122	-0.685355	-0.571442	-0.584562	-0.722282	-0.486868	-0.670381	-0.724285	-0.545639	-0.729017	-0.249851	1	Neuro system
-	ENSMMUG00000062010	0.106339	-0.288343	-0.0805158	3.44194	-0.315713	-0.298671	-0.375301	-0.295187	-0.337878	-0.379685	-0.168573	-0.300361	-0.292296	-0.415756	1	Neuro system
OXTR	ENSMMUG00000009703	0.301325	-0.213947	1.55898	1.10593	-0.359274	-0.670067	-0.540429	-1.10848	-0.622472	0.073359	-0.663505	-0.568375	-0.646197	2.35316	1	Neuro system
Metazoa_SRP	ENSMMUG00000064686	0.409684	0.150273	0.50904	3.2491	-0.469704	-0.469704	-0.469704	-0.469704	-0.0907588	-0.469704	-0.469704	-0.469704	-0.469704	-0.469704	1	Neuro system
IL17RC	ENSMMUG00000018282	-1.55986	0.416575	0.509677	2.05529	-0.755064	-0.701024	-1.27958	1.25163	-0.0855314	0.45512	-1.02364	0.548275	-0.0987723	0.266897	1	Neuro system
Metazoa_SRP	ENSMMUG00000060946	-0.382758	0.151564	-0.382758	3.28012	-0.382758	-0.382758	-0.382758	-0.382758	-0.382758	-0.382758	-0.382758	0.778658	-0.382758	-0.382758	1	Neuro system
-	ENSMMUG00000054242	-0.393393	-0.393393	-0.393393	2.37258	-0.393393	-0.393393	-0.393393	-0.393393	-0.393393	2.34814	-0.393393	-0.393393	-0.393393	-0.393393	1	Neuro system
VHL	ENSMMUG00000056789	0.566115	-0.407495	-0.125828	2.90276	-0.597533	-0.742904	-0.76568	1.02715	0.0271282	0.378156	-0.795277	-0.354637	-0.579707	-0.532257	1	Neuro system
Metazoa_SRP	ENSMMUG00000050982	0.368574	-0.895596	0.300053	1.5783	-0.0606984	-0.128238	-0.691981	0.476075	-0.570538	1.17231	-1.12057	1.81343	-1.12057	-1.12057	1	Neuro system
Metazoa_SRP	ENSMMUG00000053054	0.73852	-0.235333	-0.466669	1.36843	-0.570257	-0.633875	-0.723616	2.51077	-0.226198	0.935237	-0.723616	-0.635171	-0.723616	-0.614604	1	Neuro system
SLC6A11	ENSMMUG00000005916	-0.354436	2.21434	0.704687	1.6957	-0.574437	-0.521711	-0.546819	-0.635376	-0.625493	-0.635376	1.15256	-0.635376	-0.635376	-0.602888	1	Neuro system
SLC6A1	ENSMMUG00000005917	0.295204	2.62412	1.59679	0.776284	-0.512977	-0.546318	-0.558163	-0.567541	-0.552362	-0.576421	-0.277168	-0.565186	-0.573333	-0.562931	1	Neuro system
Metazoa_SRP	ENSMMUG00000059874	-0.359973	-0.683846	-0.143148	2.25103	-0.683846	-0.683846	-0.683846	1.26077	-0.683846	0.479737	-0.683846	-0.311612	-0.683846	1.61011	1	Neuro system
-	ENSMMUG00000060829	-0.639766	0.556153	0.499969	1.64802	-0.701134	-0.849102	-0.991443	1.93104	-0.107925	0.189656	-0.537623	-1.009	-1.00344	1.01459	1	Neuro system
HDAC11	ENSMMUG00000001369	0.326298	1.34161	0.524262	2.79512	-0.0470352	-0.378808	-0.530295	-0.207535	-0.364228	-0.640418	-0.751838	-0.641922	-0.725125	-0.700091	1	Neuro system
WNT7A	ENSMMUG00000018445	0.455387	1.03179	1.15044	2.1816	-0.789824	-0.765623	-0.789824	0.674339	-0.682507	0.664124	-0.789824	-0.789824	-0.789824	-0.760425	1	Neuro system
-	ENSMMUG00000058559	0.0583409	1.54988	0.517962	1.23819	-0.628198	-0.628198	-0.628198	-0.628198	-0.628198	-0.628198	-0.628198	-0.628198	-0.628198	2.28941	1	Neuro system
TRH	ENSMMUG00000046670	-0.303691	-0.287952	-0.295142	3.45327	-0.255668	-0.283368	-0.303597	0.111622	-0.307289	-0.31646	-0.313773	-0.309937	-0.307737	-0.280282	1	Neuro system
Metazoa_SRP	ENSMMUG00000043487	-0.46208	0.202795	-0.560623	2.18369	-0.464212	-1.05836	-0.157386	-0.610833	0.0979127	1.08391	1.76471	-1.05836	-0.325142	-0.636022	1	Neuro system
-	ENSMMUG00000063595	-1.09614	-0.211579	1.22727	1.52912	-0.682594	-0.897224	-0.886155	0.982417	0.142544	0.852086	-0.855817	-0.543523	-1.00844	1.44803	1	Neuro system
Metazoa_SRP	ENSMMUG00000061942	-0.45857	-0.45857	-0.45857	3.03466	-0.45857	-0.45857	-0.45857	1.27736	0.0397734	0.233905	-0.45857	-0.45857	-0.45857	-0.45857	1	Neuro system
PODXL2	ENSMMUG00000000164	0.0233879	0.641753	2.41321	1.9882	-0.570383	-0.567125	-0.562987	-0.530719	-0.564932	-0.550911	-0.558959	-0.554596	-0.566815	-0.0391307	1	Neuro system
CFAP100	ENSMMUG00000004192	-0.299177	-0.181602	0.543397	3.18263	-0.533012	-0.299319	0.597024	0.0749235	-0.626079	-0.374408	-0.581859	-0.250363	-0.626079	-0.626079	1	Neuro system
Metazoa_SRP	ENSMMUG00000064579	-0.504795	0.21269	-0.835046	2.15763	1.46844	-0.449921	-0.502376	-0.835046	0.0188224	1.53795	-0.522335	-0.0759177	-0.835046	-0.835046	1	Neuro system
-	ENSMMUG00000058894	-0.296331	-0.259695	1.19353	1.95278	-0.615958	-0.190492	1.63326	-0.933307	-0.933307	0.783048	-0.631734	0.164828	-0.933307	-0.933307	1	Neuro system
-	ENSMMUG00000065284	-0.803729	-0.594117	0.519907	2.42935	0.973794	0.120855	-0.803729	0.386384	1.24618	-0.447671	-0.616045	-0.803729	-0.803729	-0.803729	1	Neuro system
-	ENSMMUG00000064431	0.401758	-0.385338	1.27467	3.02469	-0.285927	-0.3354	-0.421279	-0.3947	-0.453096	-0.46094	-0.481597	-0.464916	-0.458297	-0.559625	1	Neuro system
Metazoa_SRP	ENSMMUG00000049614	-0.39086	0.150028	-0.639825	2.9699	-0.639825	-0.349492	-0.138247	1.22874	0.32573	-0.192595	-0.404082	-0.639825	-0.639825	-0.639825	1	Neuro system
U6	ENSMMUG00000058190	-0.822374	1.88978	1.62426	1.83367	-0.457306	-0.395118	-0.0842499	-0.272416	-0.348736	-0.822374	-0.128535	-0.822374	-0.371856	-0.822374	1	Neuro system
IGSF11	ENSMMUG00000008075	0.190922	2.61803	1.22305	1.06336	0.114157	-0.4226	-0.696203	-0.801063	-0.144033	-0.768064	-0.801063	-0.582894	-0.695649	-0.297958	1	Neuro system
U6	ENSMMUG00000050870	-0.58966	-0.138948	0.121869	3.01501	-0.58966	-0.58966	-0.58966	0.0500932	-0.58966	1.19675	-0.051575	-0.58966	-0.0655831	-0.58966	1	Neuro system
-	ENSMMUG00000061615	0.325522	0.895283	0.501317	2.81534	-0.67315	-0.752274	-0.759167	0.239461	-0.634567	0.522475	-0.474123	-0.753005	-0.696151	-0.556966	1	Neuro system
-	ENSMMUG00000049323	-0.451423	0.0510617	-0.0794807	3.3608	-0.51023	-0.431949	-0.450564	-0.0408639	0.113156	0.168219	-0.513132	-0.366575	-0.280399	-0.568618	1	Neuro system
Metazoa_SRP	ENSMMUG00000040591	-0.48736	0.159006	2.47181	2.17121	-0.426457	-0.48736	-0.48736	-0.48736	-0.48736	-0.267769	-0.429485	-0.417112	-0.337044	-0.48736	1	Neuro system
-	ENSMMUG00000050558	0.0416115	-0.356704	0.706649	3.25467	-0.423941	-0.509331	-0.369664	-0.164642	0.00448832	-0.0267512	-0.483077	-0.540749	-0.502773	-0.629786	1	Neuro system
Y_RNA	ENSMMUG00000052110	-0.347176	-0.347176	-0.347176	3.28209	-0.347176	-0.347176	-0.347176	-0.347176	-0.347176	-0.347176	-0.347176	-0.347176	0.884016	-0.347176	1	Neuro system
-	ENSMMUG00000058765	0.882894	1.5394	1.37337	1.01149	0.47682	1.13943	-0.889708	-0.719057	-0.39687	-0.857049	-1.06263	-0.832449	-0.886723	-0.778924	1	Neuro system
Metazoa_SRP	ENSMMUG00000051295	0.0997551	0.140136	-0.0162738	3.21499	0.621928	-0.19296	-0.602335	-0.602335	-0.148519	-0.602335	-0.602335	-0.602335	-0.602335	-0.105052	1	Neuro system
-	ENSMMUG00000063790	0.188237	-0.409321	-0.123987	3.40014	-0.286774	-0.261403	-0.373975	-0.32539	0.109715	-0.148399	-0.456578	-0.378447	-0.430461	-0.503354	1	Neuro system
ALCAM	ENSMMUG00000009107	-0.294856	0.664282	-0.76644	2.35747	-0.868978	-0.868397	-0.948145	0.0236949	-0.349962	-0.591814	0.755215	1.24799	0.611346	-0.971406	1	Neuro system
Metazoa_SRP	ENSMMUG00000058605	-0.056536	0.494412	0.178963	3.31092	-0.511426	-0.511426	-0.0948604	-0.387277	-0.457966	-0.139997	-0.433111	-0.36884	-0.511426	-0.511426	1	Neuro system
-	ENSMMUG00000057768	1.83838	0.410925	0.270004	2.55766	-0.603602	-0.603602	-0.252193	-0.603602	-0.152618	-0.446936	-0.603602	-0.603602	-0.603602	-0.603602	1	Neuro system
-	ENSMMUG00000057806	-0.228388	-0.127527	0.0731868	3.38941	-0.392674	-0.283135	-0.474377	-0.351295	0.267633	-0.474377	-0.163811	-0.285896	-0.474377	-0.474377	1	Neuro system
EPHA6	ENSMMUG00000023330	1.91193	1.48513	0.457353	1.86576	-0.657619	-0.657619	-0.657619	-0.657619	-0.45275	-0.657619	-0.657619	-0.61859	-0.253963	-0.449162	1	Neuro system
-	ENSMMUG00000058321	2.85713	-0.485654	0.202913	1.57511	-0.153041	-0.476447	-0.575279	-0.448063	-0.520498	-0.423037	0.026593	-0.429171	-0.575279	-0.575279	1	Neuro system
Metazoa_SRP	ENSMMUG00000041045	-0.243121	1.30152	0.0377458	3.00216	-0.571937	-0.59726	-0.509502	0.246131	-0.308171	-0.419585	-0.512399	-0.526524	-0.531928	-0.367132	1	Neuro system
-	ENSMMUG00000056687	-0.242361	-0.2001	1.25499	3.11815	-0.43739	-0.367715	-0.437086	-0.297936	-0.213141	-0.415114	-0.465137	-0.401127	-0.430895	-0.465137	1	Neuro system
-	ENSMMUG00000064687	-0.175928	-0.139553	-0.175552	3.43718	-0.376519	0.120901	-0.376276	-0.398719	-0.22591	-0.198613	-0.377623	-0.347507	-0.398719	-0.367159	1	Neuro system
-	ENSMMUG00000061240	1.76309	-0.36547	0.873141	2.34251	-0.0951899	-0.0579405	-0.915544	0.218165	-0.486461	-0.463991	-0.726612	-0.427146	-0.639194	-1.01935	1	Neuro system
-	ENSMMUG00000060018	-0.342114	3.12772	-0.360156	1.23053	-0.451287	-0.323974	-0.396301	-0.369349	-0.38072	-0.0590606	-0.451287	-0.38855	-0.384165	-0.451287	1	Neuro system
-	ENSMMUG00000052831	2.84389	-0.281952	-0.367341	1.76772	-0.413032	-0.393488	-0.416277	-0.382055	-0.357331	-0.387024	-0.407025	-0.397561	-0.392248	-0.416277	1	Neuro system
-	ENSMMUG00000011029	-0.790045	1.56299	1.59796	1.51431	-0.156588	-0.790045	-0.629948	-0.790045	0.853646	0.637454	-0.639553	-0.790045	-0.790045	-0.790045	1	Neuro system
-	ENSMMUG00000065329	2.01044	0.315691	-0.0914902	2.54234	-0.54375	-0.49862	-0.54375	-0.485659	-0.443691	-0.196156	-0.54375	-0.54375	-0.54375	-0.434107	1	Neuro system
TMEM271	ENSMMUG00000056562	2.11252	0.102274	0.209253	2.46673	-0.498337	-0.498337	-0.489798	-0.498337	-0.498337	-0.498337	-0.498337	-0.498337	-0.498337	-0.414281	1	Neuro system
PDE6B	ENSMMUG00000003282	-0.498476	0.999304	0.976668	2.10776	-0.642089	-0.6658	-0.670355	-0.699247	1.63669	0.176634	-0.699247	-0.699247	-0.663979	-0.658617	1	Neuro system
MYL5	ENSMMUG00000003285	-0.57909	-0.275634	2.05573	2.02121	-0.57909	-0.57909	-0.290036	1.35921	-0.57909	-0.57909	-0.57909	-0.41419	-0.402665	-0.57909	1	Neuro system
CPLX1	ENSMMUG00000005016	0.886562	0.400501	0.664349	3.02266	-0.501833	-0.50155	-0.503158	-0.503493	-0.499185	-0.459791	-0.503493	-0.501195	-0.503493	-0.496884	1	Neuro system
DGKQ	ENSMMUG00000017222	-0.445289	0.221032	1.90432	1.86423	-0.518377	-0.887972	-0.76869	0.135254	-0.710957	0.316388	-0.900939	1.217	-0.526405	-0.89959	1	Neuro system
FGFRL1	ENSMMUG00000032300	-0.317564	0.95034	0.145856	3.05797	-0.358191	-0.670935	-0.235365	-0.614386	-0.354741	-0.79093	0.153852	-0.508669	0.258129	-0.71537	1	Neuro system
SLBP	ENSMMUG00000032303	0.475801	-0.656807	0.506896	1.50799	-0.946604	-1.39571	-1.47187	0.266161	-0.286482	1.72975	-0.905164	0.68798	0.593368	-0.105309	1	Neuro system
FGFR3	ENSMMUG00000019945	-0.115411	0.884951	1.10196	2.92768	-0.52882	-0.557819	-0.609606	-0.262959	-0.34762	-0.382139	-0.542187	-0.585515	-0.486481	-0.496025	1	Neuro system
-	ENSMMUG00000003234	2.81463	0.990445	0.346889	0.184189	-0.447124	-0.890102	-0.591552	-0.222777	-0.506956	-0.623901	-0.609464	-0.890102	-0.343439	0.78927	1	Neuro system
C4orf48	ENSMMUG00000032304	0.40927	0.946654	0.424728	3.00236	-0.562813	-0.567965	-0.489839	-0.567965	-0.561281	-0.530813	-0.553278	-0.538252	-0.567965	0.15716	1	Neuro system
-	ENSMMUG00000060414	0.598747	0.538153	0.730436	3.04291	-0.553156	-0.551474	-0.491426	-0.55252	-0.390037	-0.55441	-0.55441	-0.551516	-0.553378	-0.157915	1	Neuro system
-	ENSMMUG00000055448	-0.890838	2.16407	1.17604	1.35294	-0.479634	-0.890838	0.356272	-0.890838	0.176153	0.591804	-0.500076	-0.890838	-0.383385	-0.890838	1	Neuro system
CPZ	ENSMMUG00000006237	-0.597131	3.37542	-0.485075	-0.217766	-0.608029	-0.200564	-0.324398	0.117556	-0.22393	-0.027028	-0.48615	-0.380867	-0.0175393	0.0755025	1	Neuro system
SORCS2	ENSMMUG00000022416	-0.0834809	2.08546	1.22755	1.97575	-0.0617708	-0.49715	-0.782303	-0.600953	-0.615416	-0.259633	-0.905294	-0.451135	-0.452849	-0.57878	1	Neuro system
-	ENSMMUG00000064424	1.01787	0.257279	0.122893	3.02464	-0.507629	-0.50545	-0.626426	-0.294062	-0.435436	-0.560803	-0.683954	-0.572133	-0.573845	0.337051	1	Neuro system
MRFAP1	ENSMMUG00000021695	0.206218	0.78827	0.284832	2.97167	-0.18435	-0.59712	-0.584937	-0.153221	0.1166	-0.36776	-0.847638	0.083358	-0.457019	-1.2589	1	Neuro system
-	ENSMMUG00000053541	-0.0798011	0.569909	-0.457693	2.67134	-0.365849	-0.931852	-0.931852	0.77346	-0.197522	-0.931852	-0.662919	0.047428	-0.58261	1.07981	1	Neuro system
PPP2R2C	ENSMMUG00000013416	2.27223	1.16544	1.46245	0.953665	-0.593974	-0.60358	-0.604245	-0.568975	-0.570772	-0.54173	-0.606814	-0.58358	-0.581558	-0.59856	1	Neuro system
JAKMIP1	ENSMMUG00000015099	1.01941	0.913013	0.335778	2.79752	-0.640704	-0.650758	-0.654289	-0.412121	-0.631782	0.193342	-0.652907	-0.569831	-0.626036	-0.420643	1	Neuro system
-	ENSMMUG00000056062	1.23453	1.13299	0.318734	2.67393	-0.564072	-0.585663	-0.585663	-0.585663	-0.585663	-0.313186	-0.565145	-0.46114	-0.559018	-0.554967	1	Neuro system
-	ENSMMUG00000023152	0.122682	2.22113	1.05644	1.89147	-0.68194	-0.68194	-0.68194	-0.184615	-0.68194	-0.0867803	-0.68194	-0.246755	-0.68194	-0.68194	1	Neuro system
MSX1	ENSMMUG00000051198	-0.399206	-0.132651	-0.0556624	3.28839	0.0599215	-0.33977	-0.307339	0.0406304	-0.286579	0.524754	-0.610082	-0.635271	-0.579135	-0.568	1	Neuro system
Metazoa_SRP	ENSMMUG00000054217	-0.72094	0.42166	1.98476	2.21633	-0.182643	0.539045	-0.72094	0.0899789	-0.0225549	-0.72094	-0.72094	-0.72094	-0.72094	-0.72094	1	Neuro system
NSG1	ENSMMUG00000020203	0.131419	0.166826	2.28125	2.14764	-0.326844	-0.560298	-0.668635	0.378794	-0.597209	-0.47301	-0.699572	-0.578062	-0.615578	-0.586718	1	Neuro system
DRD5	ENSMMUG00000002783	-0.0513238	2.05072	1.63308	0.917796	-0.955967	-0.805258	-0.955967	-0.567987	-0.788897	0.669094	-0.833596	-0.658902	-0.161399	0.508602	1	Neuro system
-	ENSMMUG00000051707	-0.549512	0.132984	-0.07697	2.55242	-0.394125	-0.680486	-0.705435	0.551002	1.77609	-0.863658	-0.566197	-0.502604	-0.477368	-0.19614	1	Neuro system
Metazoa_SRP	ENSMMUG00000042506	1.23157	0.82778	-0.612622	2.03094	-0.315881	-0.890728	-0.830581	1.45371	0.460902	-0.409712	-0.789448	-0.542392	-0.839826	-0.773718	1	Neuro system
QDPR	ENSMMUG00000005730	0.965965	1.75588	0.327276	0.958989	-0.666222	-0.612692	-0.609915	-0.844761	0.482766	-0.821315	1.67383	-0.756156	-0.763877	-1.08976	1	Neuro system
Metazoa_SRP	ENSMMUG00000063733	0.441215	0.288448	-0.192889	3.33879	-0.397922	-0.349342	-0.429721	-0.41379	-0.420511	-0.462223	-0.309463	-0.350972	-0.462223	-0.279396	1	Neuro system
CLRN2	ENSMMUG00000005731	1.23585	2.14041	0.924757	1.571	-0.646593	-0.646593	-0.646593	-0.646593	-0.524916	-0.646593	-0.290099	-0.646593	-0.530856	-0.646593	1	Neuro system
U6	ENSMMUG00000057366	-0.390324	-0.390324	0.734032	3.27144	-0.390324	-0.390324	0.288088	-0.390324	-0.390324	-0.390324	-0.390324	-0.390324	-0.390324	-0.390324	1	Neuro system
-	ENSMMUG00000056216	2.35836	-0.533208	-0.265256	2.13359	-0.318715	-0.508294	-0.467717	0.0274789	0.410114	-0.22646	-0.558577	-0.687865	-0.587729	-0.77572	1	Neuro system
Metazoa_SRP	ENSMMUG00000063836	-0.327775	-0.123949	1.62567	2.8024	-0.510573	-0.510573	-0.326436	-0.510573	0.434682	-0.510573	-0.510573	-0.510573	-0.510573	-0.510573	1	Neuro system
Metazoa_SRP	ENSMMUG00000063460	-0.486564	-0.486564	-0.486564	2.37795	1.08832	-0.486564	-0.486564	1.88593	-0.486564	-0.486564	-0.486564	-0.486564	-0.486564	-0.486564	1	Neuro system
-	ENSMMUG00000056986	-0.582631	0.344214	-0.800609	1.69527	1.46925	1.32153	-1.05011	0.144502	-0.767724	-0.0976035	-1.19169	0.746782	-0.0394902	-1.19169	1	Neuro system
Metazoa_SRP	ENSMMUG00000059009	-0.707094	-0.707094	1.2835	2.53435	1.37205	-0.359478	-0.406825	-0.259647	-0.321741	-0.707094	-0.707094	-0.0219007	-0.707094	-0.284832	1	Neuro system
Metazoa_SRP	ENSMMUG00000050388	-0.288601	-0.260229	0.041652	2.79427	-0.536134	-0.781903	-0.284988	-0.781903	1.13125	0.990388	-0.548352	-0.214941	-0.478608	-0.781903	1	Neuro system
Metazoa_SRP	ENSMMUG00000051168	-0.555602	-0.0503565	0.357807	3.23337	0.0418154	-0.600135	-0.554136	0.445717	-0.324575	-0.156631	-0.755695	-0.219095	-0.67368	-0.1888	1	Neuro system
UCHL1	ENSMMUG00000013071	1.5626	1.22274	0.956952	2.15352	-0.59994	-0.59678	-0.457036	-0.599979	-0.637834	-0.636209	-0.606645	-0.506895	-0.653702	-0.600793	1	Neuro system
U1	ENSMMUG00000025764	-0.267261	-0.267261	-0.267261	3.4744	-0.267261	-0.267261	-0.267261	-0.267261	-0.267261	-0.267261	-0.267261	-0.267261	-0.267261	-0.267261	1	Neuro system
-	ENSMMUG00000064942	2.01466	0.154334	-0.47842	2.59408	-0.47842	-0.47842	-0.47842	-0.47842	-0.47842	-0.120142	-0.47842	-0.47842	-0.47842	-0.337154	1	Neuro system
GABRA4	ENSMMUG00000009526	3.12758	0.648807	0.479393	0.523824	-0.499652	-0.474323	-0.499652	-0.499652	-0.499652	-0.499652	-0.499652	-0.449725	-0.419528	-0.438116	1	Neuro system
SLC10A4	ENSMMUG00000006703	-0.360766	1.98599	0.72673	2.29976	-0.63617	-0.65799	-0.635779	-0.618051	-0.532696	0.381537	-0.615283	-0.534391	-0.215718	-0.587176	1	Neuro system
ZAR1	ENSMMUG00000006704	0.13548	0.428398	-0.294235	2.95988	-0.694712	-0.637018	-0.648006	-0.613851	-0.359978	-0.179209	-0.674021	-0.505675	-0.0938994	1.17684	1	Neuro system
Metazoa_SRP	ENSMMUG00000053123	-0.475906	0.186215	-0.311194	3.39981	-0.177276	-0.336714	-0.388933	0.0173776	-0.146081	-0.0611936	-0.541332	-0.290703	-0.40352	-0.470554	1	Neuro system
-	ENSMMUG00000057223	-1.19117	-0.307513	-0.340265	2.13499	-0.308396	-0.521533	-0.704303	0.0996233	1.03367	1.26619	-0.933546	0.895384	0.132667	-1.25579	1	Neuro system
Metazoa_SRP	ENSMMUG00000052435	-0.321154	0.205393	0.118719	3.29393	-0.123818	-0.401008	-0.639792	-0.500425	-0.628413	0.251033	-0.491206	0.0989758	-0.238756	-0.623477	1	Neuro system
-	ENSMMUG00000053390	-0.705698	-0.566774	0.371597	2.50321	-0.389068	-0.669308	-0.543651	-0.177565	1.9065	0.184	-0.472252	-0.329759	-0.214731	-0.896499	1	Neuro system
NKX6-1	ENSMMUG00000021161	-0.390488	2.65247	-0.390488	2.03339	-0.390488	-0.390488	-0.390488	-0.390488	-0.390488	-0.390488	-0.390488	-0.390488	-0.390488	-0.390488	1	Neuro system
-	ENSMMUG00000053321	-0.748685	1.04383	0.502185	1.70943	-0.688698	-0.773875	-0.596088	-0.582371	0.0110237	2.28413	-0.608868	-0.461899	-0.623368	-0.46675	1	Neuro system
SCD5	ENSMMUG00000052743	0.147937	1.34264	1.84533	2.15678	-0.601725	-0.595923	-0.631404	-0.31888	-0.616648	-0.596139	-0.644429	-0.582186	-0.427613	-0.477735	1	Neuro system
-	ENSMMUG00000051499	-0.189952	-0.111402	0.471356	3.37987	-0.381529	-0.381529	-0.381529	-0.381529	-0.381529	-0.381529	-0.381529	-0.381529	-0.342267	-0.155376	1	Neuro system
Metazoa_SRP	ENSMMUG00000062489	-0.479745	-0.479745	-0.479745	2.62123	-0.479745	1.51557	-0.479745	-0.479745	-0.479745	-0.479745	1.14039	-0.479745	-0.479745	-0.479745	1	Neuro system
-	ENSMMUG00000049988	-0.0025064	2.57024	0.0713624	2.00977	-0.493441	-0.656307	-0.656307	-0.574524	-0.304138	-0.362692	-0.295179	-0.405831	-0.321329	-0.579127	1	Neuro system
PRDM8	ENSMMUG00000051357	0.344224	0.67654	1.29426	1.88253	-0.514348	-0.455483	-0.972982	1.30964	-0.990967	-0.324906	-1.06327	0.201976	-0.0417755	-1.34544	1	Neuro system
NAA11	ENSMMUG00000021988	-0.549069	2.62619	-0.34856	-0.113729	-0.309722	-0.128892	-0.549069	-0.549069	-0.238541	-0.333322	-0.549069	-0.411032	-0.549069	2.00295	1	Neuro system
-	ENSMMUG00000062999	1.41658	-0.451089	0.0189713	2.97604	-0.186137	-0.368708	-0.515018	-0.62625	-0.0552479	-0.229531	-0.62625	-0.372426	-0.354686	-0.62625	1	Neuro system
Metazoa_SRP	ENSMMUG00000052563	-0.323268	-0.301081	1.86697	2.08745	-0.709016	-0.709016	-0.709016	1.02808	-0.709016	-0.0160747	-0.709016	0.62103	-0.709016	-0.709016	1	Neuro system
Metazoa_SRP	ENSMMUG00000056217	-0.175899	-0.327721	-0.909821	2.74805	-0.178524	-0.0539516	-0.724996	1.29351	0.513353	0.408564	-0.736085	-0.488065	-0.458587	-0.909821	1	Neuro system
-	ENSMMUG00000055625	0.13491	-0.122114	-0.0546128	3.36313	-0.0814761	-0.484372	-0.579039	0.0997188	-0.281554	-0.265976	-0.109789	-0.404662	-0.563154	-0.651009	1	Neuro system
-	ENSMMUG00000039866	-0.530237	-0.385268	0.842926	3.19649	-0.257047	-0.210511	-0.392148	-0.530237	0.355853	-0.283983	-0.530237	-0.215127	-0.530237	-0.530237	1	Neuro system
U1	ENSMMUG00000027929	-0.696928	-0.0460933	0.559259	1.77956	-0.898421	-0.898421	-0.424826	0.00894163	0.403987	0.0667879	-0.707629	-0.66684	-0.815832	2.33646	1	Neuro system
EPHA5	ENSMMUG00000014468	1.46893	1.5601	1.46368	1.33533	-0.720003	-0.733384	-0.72662	-0.52173	-0.707343	0.388329	-0.727026	-0.64078	-0.725127	-0.714361	1	Neuro system
-	ENSMMUG00000059481	0.429295	0.414258	1.71897	2.41773	-0.583211	-0.616779	-0.665545	-0.394804	-0.674484	-0.690514	-0.678794	-0.595385	-0.662547	0.58181	1	Neuro system
IGFBP7	ENSMMUG00000014011	-0.837878	0.81001	-0.750175	1.55001	0.336207	-0.584615	-0.819248	-0.10161	0.400596	0.0151308	-0.711985	-0.813179	-0.839777	2.34652	1	Neuro system
-	ENSMMUG00000062484	-0.997144	-0.301081	1.7134	1.95338	-0.16074	-0.328793	-0.667503	-0.32014	-0.427038	1.42367	-0.692878	0.518104	-0.688886	-1.02436	1	Neuro system
-	ENSMMUG00000061562	-0.38401	0.149287	-0.368698	1.60917	-0.519534	-0.519534	-0.474028	2.87098	-0.344334	-0.519534	-0.519534	-0.0522518	-0.408436	-0.519534	1	Neuro system
PAICS	ENSMMUG00000016366	-0.315247	-0.318846	0.17738	2.701	-0.330501	-0.125241	-1.22155	-0.710044	0.446605	0.507036	0.126097	-0.0809119	0.69142	-1.54719	1	Neuro system
CRACD	ENSMMUG00000016358	-0.0284966	0.645417	0.104932	2.99323	-0.621489	-0.613106	-0.618805	-0.521905	-0.60572	-0.580269	-0.635262	0.880343	0.141884	-0.540756	1	Neuro system
-	ENSMMUG00000051109	0.773751	-0.25464	0.776755	2.70618	-0.120599	0.654206	-0.829037	0.462889	-0.778163	-0.84849	-0.586658	-0.394035	-0.679829	-0.882335	1	Neuro system
U1	ENSMMUG00000026128	1.12169	0.523183	0.347305	2.90611	-0.308214	-0.731963	-0.83153	-0.568832	-0.324359	-0.367276	-0.836071	-0.216298	-0.445214	-0.268532	1	Neuro system
-	ENSMMUG00000062799	-0.638881	0.723262	1.5115	2.16244	1.41464	-0.638881	-0.638881	-0.638881	-0.305851	-0.638881	-0.394951	-0.638881	-0.638881	-0.638881	1	Neuro system
NAP1L5	ENSMMUG00000058544	0.560757	0.474292	2.12301	2.1946	-0.654648	-0.454075	-0.719235	-0.557324	-0.374228	-0.1953	-0.631494	-0.439896	-0.553036	-0.773419	1	Neuro system
-	ENSMMUG00000054580	-0.395348	-0.267967	0.416198	3.28819	-0.459962	-0.35286	0.314881	-0.45914	0.202919	-0.383106	-0.570349	-0.406148	-0.336624	-0.590687	1	Neuro system
Metazoa_SRP	ENSMMUG00000057096	-0.50542	-0.142446	0.0675994	3.22696	-0.50542	0.695373	0.186075	0.00979546	-0.50542	-0.50542	-0.50542	-0.50542	-0.50542	-0.50542	1	Neuro system
SNCA	ENSMMUG00000012123	0.99555	0.910106	2.29398	1.5961	-0.590269	-0.547192	-0.605017	-0.554405	-0.608561	-0.507643	-0.604716	-0.555552	-0.611588	-0.61079	1	Neuro system
-	ENSMMUG00000055876	-0.192859	-0.374869	2.31983	2.38854	-0.457711	-0.449011	-0.450196	-0.36812	-0.361263	-0.363898	-0.457711	-0.431987	-0.343037	-0.457711	1	Neuro system
-	ENSMMUG00000049525	-0.221957	-0.511909	0.785629	2.91854	-0.323899	-0.372867	-0.319517	-0.271888	1.09451	-0.00231153	-0.72448	-0.72448	-0.600894	-0.72448	1	Neuro system
-	ENSMMUG00000064386	-0.494613	-0.201451	-0.366728	2.18288	-0.472686	-0.472192	-0.561589	-0.494517	2.45229	-0.265953	0.0944929	-0.629552	-0.491279	-0.279107	1	Neuro system
-	ENSMMUG00000053868	-0.15165	-0.60331	0.0242077	2.73275	-0.559594	0.303195	-0.322205	-0.151154	1.63065	-0.535938	-0.353823	-0.314727	-0.849201	-0.849201	1	Neuro system
Metazoa_SRP	ENSMMUG00000053192	-0.576939	-0.167034	0.381244	2.45778	0.0162938	-0.278657	-0.873835	-0.0386132	-0.805641	1.46058	-0.888274	0.807642	-0.380041	-1.1145	1	Neuro system
TACR3	ENSMMUG00000049998	-0.219091	3.08713	1.12442	0.352379	-0.501911	-0.501911	-0.501911	-0.501911	-0.420663	-0.501911	-0.501911	-0.140743	-0.270064	-0.501911	1	Neuro system
Metazoa_SRP	ENSMMUG00000050763	-0.420385	-0.420385	-0.420385	3.32224	-0.0462645	-0.20146	-0.231278	-0.138588	-0.420385	-0.420385	-0.420385	0.658435	-0.420385	-0.420385	1	Neuro system
Metazoa_SRP	ENSMMUG00000055759	-0.267261	-0.267261	-0.267261	3.4744	-0.267261	-0.267261	-0.267261	-0.267261	-0.267261	-0.267261	-0.267261	-0.267261	-0.267261	-0.267261	1	Neuro system
-	ENSMMUG00000051110	-0.186449	0.515436	0.500943	2.45658	-0.572092	-0.572092	-0.572092	-0.572092	-0.572092	-0.572092	1.86231	-0.572092	-0.572092	-0.572092	1	Neuro system
COL25A1	ENSMMUG00000017703	0.323301	1.15567	-0.301588	2.17823	-0.683653	-0.656965	-0.614494	-0.580596	1.89026	-0.642543	-0.510294	-0.631048	-0.59923	-0.327046	1	Neuro system
-	ENSMMUG00000053509	0.67058	-0.266766	-0.230746	3.25649	-0.114431	-0.32493	-0.490875	-0.0111184	0.151275	-0.515288	-0.483213	-0.381993	-0.60617	-0.652815	1	Neuro system
Metazoa_SRP	ENSMMUG00000061334	0.0101456	0.473197	-0.0584848	3.35807	-0.405136	-0.405136	-0.405136	-0.405136	-0.136707	-0.405136	-0.405136	-0.405136	-0.405136	-0.405136	1	Neuro system
-	ENSMMUG00000062879	0.632299	-0.275514	0.47767	3.15536	-0.076895	-0.0743069	-0.0679128	-0.544529	-0.289233	-0.263568	-0.674991	-0.492051	-0.608424	-0.897904	1	Neuro system
Metazoa_SRP	ENSMMUG00000059312	-0.511951	-1.26489	-0.408679	1.88717	1.30633	0.172886	0.108571	1.31809	-0.835177	-0.057704	-0.848997	0.675066	-0.114713	-1.426	1	Neuro system
-	ENSMMUG00000062519	-0.24598	-0.244208	-0.388856	3.28434	-0.333006	-0.260468	-0.368266	-0.369972	0.619118	0.298507	-0.528565	-0.364579	-0.510601	-0.587462	1	Neuro system
QRFPR	ENSMMUG00000050565	-0.177477	-0.0349208	0.670017	1.96044	-0.0902104	-0.992007	-0.992007	1.72502	-0.173015	1.12148	-0.992007	-0.887989	-0.658144	-0.479187	1	Neuro system
TMEM155	ENSMMUG00000001752	2.98705	-0.331329	-0.413048	-0.413048	-0.413048	-0.413048	-0.413048	1.52986	-0.263202	-0.413048	-0.413048	-0.413048	-0.341782	-0.276216	1	Neuro system
-	ENSMMUG00000062510	-0.211151	-0.544714	0.187417	3.30671	-0.284891	-0.274511	-0.607406	-0.12049	0.193432	0.288535	-0.511416	-0.239407	-0.516755	-0.665354	1	Neuro system
Metazoa_SRP	ENSMMUG00000055559	-0.338378	-0.318927	-0.111973	3.30736	-0.67656	-0.282186	-0.16557	-0.168926	0.41641	-0.372812	-0.0361172	0.100801	-0.67656	-0.67656	1	Neuro system
-	ENSMMUG00000059781	-0.174848	-0.382406	-0.173891	3.37415	-0.063707	-0.345387	-0.170688	-0.231274	-0.155422	-0.53871	-0.527645	-0.0900499	-0.742736	0.222614	1	Neuro system
FGF2	ENSMMUG00000007419	0.127183	1.60483	0.00224379	1.68781	0.156535	0.193964	-0.945273	1.67282	-0.836369	-0.51961	-1.20918	-0.386142	-0.661408	-0.887396	1	Neuro system
Metazoa_SRP	ENSMMUG00000063564	-0.307406	-0.586449	-0.586449	2.95365	-0.308403	-0.26104	-0.305361	0.251275	-0.586449	1.41859	-0.586449	-0.265739	-0.243323	-0.586449	1	Neuro system
U6	ENSMMUG00000028342	0.601184	-0.684889	-0.684889	1.64594	1.87806	-0.684889	-0.684889	1.24559	-0.684889	-0.684889	-0.684889	0.793222	-0.684889	-0.684889	1	Neuro system
-	ENSMMUG00000057111	0.21666	-0.228404	0.445719	2.29244	1.47741	-0.503991	-0.625123	-0.121385	0.578456	-0.327818	-0.99216	0.262287	-1.08075	-1.39334	1	Neuro system
-	ENSMMUG00000049810	0.0667	0.89081	2.2067	2.00662	-0.672392	-0.672392	-0.589669	-0.672392	-0.141577	0.065204	-0.672392	-0.672392	-0.470431	-0.672392	1	Neuro system
PCDH10	ENSMMUG00000023149	1.08301	1.87253	1.67816	1.36326	-0.644849	-0.655669	-0.654452	-0.651286	-0.446729	-0.535735	-0.615161	-0.622042	-0.514006	-0.657027	1	Neuro system
-	ENSMMUG00000051665	-0.579235	0.623901	-0.640792	1.74857	1.64633	-0.517344	-0.951716	-0.951716	-0.470188	-0.282607	0.282728	-0.523615	1.5674	-0.951716	1	Neuro system
-	ENSMMUG00000051502	-0.301508	-0.208706	0.339249	3.33786	0.216327	-0.00191918	-0.537714	-0.289445	-0.150208	-0.524203	-0.519591	-0.446007	-0.405489	-0.50865	1	Neuro system
Metazoa_SRP	ENSMMUG00000055548	0.58247	-0.0711311	0.585484	1.387	0.219697	2.13086	-0.845537	-1.20581	-1.20581	0.0791448	-0.189829	0.438436	-1.20581	-0.699165	1	Neuro system
Metazoa_SRP	ENSMMUG00000041326	-1.18699	0.202832	1.79069	2.04554	-0.1113	0.67403	-0.619618	-0.905165	-0.580207	0.583634	-0.431439	0.16165	-0.436679	-1.18699	1	Neuro system
Metazoa_SRP	ENSMMUG00000049814	-1.18154	0.533691	0.365773	1.96798	1.58899	0.304596	-0.481327	-0.659828	-0.282918	-0.14097	-0.742737	0.948899	-1.03908	-1.18154	1	Neuro system
-	ENSMMUG00000062408	-0.579988	-0.324217	1.13941	2.84736	-0.478624	-0.779443	0.0529514	0.35682	-0.397366	-0.363362	-0.514674	0.588579	-0.564574	-0.982873	1	Neuro system
-	ENSMMUG00000064731	-0.303967	3.06119	0.38277	1.21942	-0.409588	-0.437526	-0.462116	-0.430464	-0.462116	-0.424237	-0.452133	-0.425763	-0.423222	-0.432245	1	Neuro system
-	ENSMMUG00000051329	-0.744507	2.36288	1.68955	1.09993	-0.656247	-0.00407183	-0.833402	-0.166212	-0.0289598	-0.514026	-0.833402	-0.629063	-0.28685	-0.45562	1	Neuro system
-	ENSMMUG00000056698	-0.231974	0.88777	1.86296	2.37015	-0.0803342	-0.197966	-0.797425	-0.720263	-0.332249	-0.705084	-0.74875	-0.620184	-0.544586	-0.142057	1	Neuro system
MGAT4D	ENSMMUG00000030139	-0.464119	0.835726	-0.194708	2.0508	-0.866541	1.94918	-0.866541	-0.866541	0.694159	-0.143649	-0.485492	-0.404029	-0.371703	-0.866541	1	Neuro system
Y_RNA	ENSMMUG00000025709	-0.384718	2.84091	-0.384718	-0.384718	-0.384718	-0.384718	-0.384718	-0.384718	-0.384718	-0.384718	-0.384718	-0.384718	-0.384718	1.7757	1	Neuro system
FREM3	ENSMMUG00000003319	3.41328	-0.262914	-0.374172	0.350387	-0.248375	-0.349634	-0.352976	-0.342587	-0.210963	-0.374172	-0.214781	-0.374172	-0.374172	-0.284751	1	Neuro system
Metazoa_SRP	ENSMMUG00000057528	1.42007	-0.321673	0.544741	2.89092	-0.407907	-0.468336	-0.553581	-0.33413	-0.553581	-0.42227	-0.553581	-0.133514	-0.553581	-0.553581	1	Neuro system
-	ENSMMUG00000062629	0.789979	0.153999	0.106178	3.12916	-0.495774	-0.651934	-0.40669	0.276775	-0.198162	-0.290218	-0.670716	-0.554931	-0.435842	-0.751822	1	Neuro system
POU4F2	ENSMMUG00000053730	-0.411897	2.55961	-0.411897	2.13438	-0.411897	-0.411897	-0.411897	-0.411897	-0.411897	-0.411897	-0.411897	-0.411897	-0.411897	-0.16312	1	Neuro system
-	ENSMMUG00000062288	0.401983	0.0131861	0.483595	1.07723	-1.00931	-0.655585	-0.767532	2.75434	-0.566357	0.210611	-1.03259	-0.397436	-0.033057	-0.479088	1	Neuro system
-	ENSMMUG00000063624	3.13544	-0.357538	-0.14751	1.21357	-0.454893	-0.401215	-0.454893	-0.247611	-0.216871	-0.454893	-0.411308	-0.349087	-0.398292	-0.454893	1	Neuro system
DCLK2	ENSMMUG00000002211	-0.592033	2.57196	1.22871	1.35677	-0.445044	-0.460034	-0.813541	-0.325707	-0.0328033	-0.145432	-0.726969	-0.301175	-0.675642	-0.639064	1	Neuro system
-	ENSMMUG00000059101	-0.624005	-0.277312	0.0697482	2.8097	-0.425236	-0.665913	-0.732864	-0.212266	1.28229	0.650588	-0.564541	0.10255	-0.577267	-0.835475	1	Neuro system
Metazoa_SRP	ENSMMUG00000055414	-0.390412	-0.704974	-0.442397	2.71563	-0.704974	-0.521559	-0.704974	0.711559	0.718308	0.142624	-0.704974	1.10269	-0.511573	-0.704974	1	Neuro system
Metazoa_SRP	ENSMMUG00000063009	-0.536658	-0.536658	0.8844	2.54871	-0.536658	-0.536658	-0.536658	-0.536658	1.66413	-0.536658	0.269334	-0.536658	-0.536658	-0.536658	1	Neuro system
-	ENSMMUG00000059421	-0.83855	-0.61203	1.66467	1.87892	0.0151888	-0.83855	-0.62278	0.447567	-0.700095	-0.261379	-0.534313	1.6233	-0.83855	-0.383402	1	Neuro system
-	ENSMMUG00000053551	0.145922	-0.0977912	0.147045	3.34632	-0.255118	0.256718	-0.386549	-0.520888	-0.348483	-0.520888	-0.520888	-0.367612	-0.356899	-0.520888	1	Neuro system
-	ENSMMUG00000062029	-0.327344	-0.299417	0.177403	3.38656	-0.327823	-0.349707	-0.422698	-0.3751	-0.164516	0.294657	-0.388788	-0.351317	-0.390674	-0.461232	1	Neuro system
-	ENSMMUG00000062956	0.681612	-0.19338	-0.270049	3.30976	-0.11153	-0.557323	-0.487989	-0.19571	-0.156912	-0.371859	-0.524736	-0.280447	-0.430368	-0.411069	1	Neuro system
TRIM61	ENSMMUG00000012508	-0.623921	-0.232269	-0.745174	2.77088	-0.382718	0.66882	-0.745174	-0.563166	0.508824	-0.745174	-0.171112	-0.187743	1.1931	-0.745174	1	Neuro system
-	ENSMMUG00000053404	-0.463156	0.338551	0.456852	3.26955	-0.463603	-0.588371	-0.462238	-0.212457	-0.102751	-0.588371	-0.469806	0.131194	-0.4344	-0.410993	1	Neuro system
-	ENSMMUG00000055765	2.72602	-0.466196	-0.610082	0.60662	-0.183872	-0.0194308	-0.823915	0.789779	0.520698	0.591111	-0.537647	-1.14922	-0.752118	-0.691752	1	Neuro system
Metazoa_SRP	ENSMMUG00000055697	1.03184	0.405228	0.462286	2.42459	-0.682601	-0.682601	-0.682601	1.37619	-0.23933	-0.682601	-0.682601	-0.682601	-0.682601	-0.682601	1	Neuro system
-	ENSMMUG00000050412	-0.626237	-0.490492	-0.411939	2.86335	-0.242527	-0.476546	-0.626237	-0.626237	-0.128413	0.75727	-0.504692	1.29165	-0.152714	-0.626237	1	Neuro system
GALNTL6	ENSMMUG00000016767	0.362861	2.94197	0.740107	0.0238064	-0.695484	-0.464072	-0.695484	-0.695484	-0.609973	0.849213	-0.632851	-0.315366	-0.207461	-0.601782	1	Neuro system
Metazoa_SRP	ENSMMUG00000048727	0.0107134	-0.539357	1.2973	2.94989	-0.265305	-0.539357	-0.539357	-0.126511	-0.539357	0.448766	-0.539357	-0.539357	-0.539357	-0.539357	1	Neuro system
-	ENSMMUG00000054219	2.42945	1.31236	0.73598	1.17929	-0.466277	-0.728498	-0.728498	-0.596823	-0.388293	-0.57092	-0.728498	-0.224401	-0.620632	-0.604235	1	Neuro system
ING2	ENSMMUG00000008881	0.709918	-0.374722	1.13128	1.87768	-0.982181	-1.18231	-1.14908	0.219482	-0.422074	-0.128775	-0.678617	1.17745	0.838453	-1.03651	1	Neuro system
-	ENSMMUG00000049655	0.670126	-0.201033	0.123056	3.28676	-0.426814	-0.483466	-0.28726	-0.56338	-0.29761	-0.194077	-0.498492	-0.169576	-0.394849	-0.56338	1	Neuro system
FAM149A	ENSMMUG00000039058	-1.35021	0.989864	0.930412	1.30707	0.106673	-0.47724	-0.956743	1.53386	0.946488	-0.525344	0.262986	-0.649038	-0.736196	-1.38258	1	Neuro system
-	ENSMMUG00000053909	0.909899	2.73835	0.636985	1.14642	-0.552147	-0.508429	-0.552147	-0.552147	-0.552147	-0.552147	-0.552147	-0.552147	-0.506049	-0.552147	1	Neuro system
PRMT2	ENSMMUG00000015803	-0.025631	2.22907	0.74963	0.688752	0.337138	-0.216775	-1.56363	0.244827	0.247659	0.513856	-1.42681	-0.0409872	-0.390465	-1.34663	1	Neuro system
S100B	ENSMMUG00000063077	-0.0999955	3.15681	1.0395	0.240535	-0.406498	-0.419244	-0.427388	-0.457173	-0.444941	-0.455048	-0.456053	-0.38377	-0.440448	-0.446283	1	Neuro system
LSS	ENSMMUG00000022329	-0.861659	1.00103	0.509196	2.5643	-0.858926	-0.992404	-0.939855	0.612178	-0.203727	0.226041	0.533866	-0.276706	-0.408378	-0.90495	1	Neuro system
-	ENSMMUG00000064313	0.444558	0.260622	0.00896708	3.26898	-0.491377	-0.574986	-0.533775	0.121211	-0.498735	-0.126367	-0.482739	-0.327088	-0.538674	-0.530602	1	Neuro system
SPATC1L	ENSMMUG00000058335	2.11684	0.184594	0.891884	2.03952	-0.672841	-0.612929	-0.725704	0.0522774	-0.64105	-0.00888087	-0.728946	-0.635888	-0.757751	-0.501123	1	Neuro system
-	ENSMMUG00000043221	-0.75124	0.686485	0.00532823	2.53405	-0.75124	-0.75124	0.61825	1.28951	-0.165392	-0.75124	-0.75124	0.290452	-0.75124	-0.75124	1	Neuro system
TRPM2	ENSMMUG00000004175	-0.251912	2.26479	0.853091	1.56035	-0.624423	-0.774798	-0.89156	0.475122	-0.819634	0.527628	-0.703868	-0.114964	-0.591165	-0.908656	1	Neuro system
CFAP410	ENSMMUG00000049578	1.58407	0.486191	1.74118	1.63047	-0.0313112	-0.743401	-0.898788	-0.313713	-0.557876	-0.0260654	-1.14195	-0.0224227	-0.726686	-0.979698	1	Neuro system
AIRE	ENSMMUG00000004168	0.230688	0.778624	-0.83844	2.6756	0.816115	0.873641	-0.741503	-0.0894599	-0.53657	-0.661326	-0.893174	-0.446039	-0.793026	-0.37513	1	Neuro system
AGPAT3	ENSMMUG00000045179	-0.548087	0.923572	1.22874	2.43999	0.40929	-0.270789	-0.59012	-0.0891712	-0.299921	-0.216962	-0.1416	-0.278037	-0.924781	-1.64213	1	Neuro system
RRP1	ENSMMUG00000012304	-0.190175	0.741694	0.985212	1.98056	-0.431303	-1.04132	-0.670817	1.2277	-0.777526	1.05967	-0.905772	-0.14336	-0.772985	-1.06157	1	Neuro system
PDXK	ENSMMUG00000062457	0.12551	0.992503	1.42088	2.01693	-0.447725	-0.964319	-0.765125	-0.596823	-0.2844	-0.462774	-0.799675	1.24359	-0.374507	-1.10407	1	Neuro system
Metazoa_SRP	ENSMMUG00000060092	-0.497374	-0.108658	0.664896	2.56372	0.758772	-0.339848	0.146229	-0.496701	0.188703	0.825281	-0.846956	-0.355812	-1.05683	-1.44542	1	Neuro system
Metazoa_SRP	ENSMMUG00000054515	-0.497994	-0.497994	-0.497994	1.51203	-0.497994	-0.497994	1.73638	-0.497994	-0.497994	-0.497994	-0.497994	-0.497994	2.22952	-0.497994	1	Neuro system
Metazoa_SRP	ENSMMUG00000064055	0.866334	-0.326627	-0.0915824	3.20861	-0.431092	-0.494782	-0.48115	0.12852	-0.43523	-0.192506	-0.54815	-0.082864	-0.553047	-0.566436	1	Neuro system
RSPH1	ENSMMUG00000018084	0.931208	0.524887	1.1938	2.55736	-0.744017	-0.733863	-0.743365	-0.444439	-0.803625	-0.803625	-0.803625	0.158938	0.00553519	-0.295171	1	Neuro system
C2CD2	ENSMMUG00000007030	-0.933243	2.05512	0.076857	1.21674	-0.490348	-0.876933	-1.04884	-0.540033	-0.336682	1.80972	0.0346351	-0.125706	-0.0610099	-0.780288	1	Neuro system
-	ENSMMUG00000024041	-0.188258	1.46811	0.536548	2.87161	-0.498143	-0.498143	-0.498143	-0.498143	-0.498143	-0.498143	-0.204716	-0.498143	-0.498143	-0.498143	1	Neuro system
Metazoa_SRP	ENSMMUG00000055281	0.576445	-0.111113	-0.0846737	3.27219	0.176397	-0.615175	-0.455129	-0.138189	-0.512477	-0.329765	-0.389509	-0.158657	-0.615175	-0.615175	1	Neuro system
Metazoa_SRP	ENSMMUG00000044278	-0.502877	-0.502877	1.744	1.9363	-0.502877	1.85134	-0.502877	-0.502877	-0.502877	-0.502877	-0.502877	-0.502877	-0.502877	-0.502877	1	Neuro system
Metazoa_SRP	ENSMMUG00000052250	1.73424	0.422	-0.198246	2.61163	-0.403705	-0.529885	-0.554128	-0.478767	-0.707879	-0.707879	-0.707879	0.344664	-0.332509	-0.491663	1	Neuro system
PIGP	ENSMMUG00000016211	-0.523925	1.01857	1.63289	2.30852	-0.790544	-0.642269	-0.596397	-0.677166	0.390685	-0.398169	-0.671436	-0.128433	0.103136	-1.02546	1	Neuro system
-	ENSMMUG00000058732	1.74249	-0.877062	-0.877062	1.97149	0.689047	-0.877062	-0.877062	0.695784	-0.877062	0.0640671	-0.877062	-0.274921	-0.232835	0.607257	1	Neuro system
Metazoa_SRP	ENSMMUG00000065005	-0.631531	0.408306	-0.631531	2.93261	0.838119	0.515133	-0.631531	0.106455	-0.631531	0.251632	-0.631531	-0.631531	-0.631531	-0.631531	1	Neuro system
-	ENSMMUG00000051823	-0.515548	3.06799	-0.0803751	0.901709	-0.515548	-0.515548	-0.515548	-0.515548	0.158404	-0.515548	-0.515548	-0.515548	-0.515548	0.592207	1	Neuro system
OLIG2	ENSMMUG00000017652	-0.0131821	1.87916	0.619191	2.55747	-0.515583	-0.511275	-0.515583	-0.493403	-0.501256	-0.482403	-0.515583	-0.481617	-0.515583	-0.51035	1	Neuro system
-	ENSMMUG00000052037	1.61078	0.0309588	2.16052	1.15849	-0.956158	-0.956158	-0.956158	-0.255588	-0.0511335	-0.536965	-0.956158	0.384856	-0.382261	-0.29502	1	Neuro system
Metazoa_SRP	ENSMMUG00000055021	-0.443974	-0.00676651	0.246236	3.30245	-0.443974	-0.443974	-0.443974	-0.443974	-0.443974	-0.443974	-0.0525024	0.506351	-0.443974	-0.443974	1	Neuro system
-	ENSMMUG00000051417	-0.474632	-0.113499	2.37592	2.31045	-0.474632	-0.474632	-0.474632	-0.474632	-0.474632	-0.474632	-0.474632	-0.27839	-0.264674	-0.232757	1	Neuro system
-	ENSMMUG00000057252	0.56738	-0.478271	0.276532	3.21265	-0.485415	-0.397387	-0.48414	-0.075365	0.380633	-0.496902	-0.435846	-0.534732	-0.530035	-0.519106	1	Neuro system
Metazoa_SRP	ENSMMUG00000059438	-0.28738	0.180053	-0.706591	2.33246	0.407307	-0.543636	2.10862	-0.077328	-0.345299	-0.706591	-0.574276	-0.545988	-0.534763	-0.706591	1	Neuro system
-	ENSMMUG00000052276	-0.874537	0.356332	0.30523	2.96769	-0.336075	-0.244352	-0.79079	0.373412	0.737613	-0.35183	-0.0479554	-0.396778	-0.823422	-0.874537	1	Neuro system
ATP5PF	ENSMMUG00000008725	-0.823217	-0.81409	0.34278	1.89423	0.283113	-0.42672	-0.822055	-0.0290623	0.249018	0.443458	-0.681379	-0.799521	-0.981913	2.16536	1	Neuro system
Metazoa_SRP	ENSMMUG00000054670	-0.504407	-0.555487	0.111044	3.31619	0.143244	-0.486396	-0.285237	-0.612801	-0.472674	0.0686996	-0.304889	0.321546	-0.279583	-0.459252	1	Neuro system
-	ENSMMUG00000053441	0.736615	-0.137029	0.141327	3.2607	-0.19231	-0.17471	-0.489085	-0.522461	-0.265459	-0.343902	-0.522461	-0.446299	-0.522461	-0.522461	1	Neuro system
-	ENSMMUG00000062507	0.860837	0.265953	-0.307871	3.22662	-0.448945	-0.448945	-0.321263	-0.448945	-0.448945	-0.448945	-0.448945	-0.400385	-0.241129	-0.389093	1	Neuro system
-	ENSMMUG00000060808	-0.253911	2.73765	0.378285	1.59422	-0.385497	0.126117	-0.381943	-0.66144	-0.54178	-0.710382	-0.648635	0.00161783	-0.590103	-0.664194	1	Neuro system
LIPI	ENSMMUG00000037492	-0.288868	-0.133548	-0.299667	2.39308	-0.389929	-0.523557	-0.523557	-0.221599	2.2937	-0.523557	-0.460064	-0.44649	-0.399877	-0.476064	1	Neuro system
-	ENSMMUG00000059531	0.0114365	-0.290653	0.40504	3.35826	-0.296218	-0.424667	-0.448141	-0.508403	-0.335678	-0.135954	-0.380665	0.0145214	-0.471112	-0.497771	1	Neuro system
-	ENSMMUG00000060576	-0.850554	-0.237894	0.926684	2.6733	-0.275168	-0.892382	-0.569931	-0.341041	-0.355806	1.16305	-0.428925	0.280487	-0.0151015	-1.07672	1	Neuro system
FAM20C	ENSMMUG00000052328	-0.79927	1.12808	1.00589	2.23421	0.0248617	-1.27447	-0.0195729	0.144401	-0.940585	-1.48464	-0.340853	-0.00328106	0.463501	-0.138274	1	Neuro system
PDGFA	ENSMMUG00000004949	-0.444324	1.34508	0.36208	2.20739	-0.12636	-0.978275	0.0423665	-0.107253	-0.508556	-0.49332	-1.44511	0.856215	0.489989	-1.19992	1	Neuro system
PRKAR1B	ENSMMUG00000053014	1.40514	1.01357	1.21518	2.22846	-0.354247	-0.485041	-0.698603	-0.522876	-0.588054	-0.519538	-0.715519	-0.653134	-0.682975	-0.642364	1	Neuro system
GET4	ENSMMUG00000017063	-0.642946	0.714815	1.84405	2.25844	-0.786779	-1.00176	-0.692615	0.535996	-0.196487	-0.240063	-0.832471	-0.107009	-0.325525	-0.527642	1	Neuro system
ADAP1	ENSMMUG00000017064	0.351547	1.22948	1.51114	2.3764	-0.693107	-0.774655	-0.705431	-0.267311	-0.608666	-0.28968	-0.70426	-0.373736	-0.260047	-0.791672	1	Neuro system
MAFK	ENSMMUG00000037597	0.395683	0.174715	-0.140606	1.71885	0.31493	-0.509444	0.347799	2.24683	-0.731616	-0.454813	-1.26931	-0.155023	-0.802322	-1.13568	1	Neuro system
ELFN1	ENSMMUG00000003283	1.02445	1.81329	-0.504289	1.95112	-0.440133	-0.806585	-0.810524	-0.537701	1.05601	-0.479116	-0.530235	-0.692992	-0.80501	-0.23829	1	Neuro system
Metazoa_SRP	ENSMMUG00000055803	-0.387125	-0.387125	-0.387125	2.77622	-0.387125	-0.387125	-0.387125	-0.387125	1.86928	-0.387125	-0.387125	-0.387125	-0.387125	-0.387125	1	Neuro system
NUDT1	ENSMMUG00000022072	-0.4694	0.573516	0.944015	1.4673	-0.243547	-1.17141	-1.02465	1.39032	0.145926	1.33471	-0.687566	-0.0508523	-0.732879	-1.47548	1	Neuro system
SNX8	ENSMMUG00000022074	-0.194795	0.279015	0.657606	1.61107	-0.554735	-1.00835	-0.690087	1.58438	-0.0644062	1.65271	-0.842948	-0.548072	-0.820572	-1.06082	1	Neuro system
EIF3B	ENSMMUG00000015529	-0.62244	-0.763867	0.00797769	2.91568	0.0987177	-1.02667	-0.0328537	0.71561	-0.514194	0.806335	-0.871864	-0.221859	-0.0144507	-0.476127	1	Neuro system
LFNG	ENSMMUG00000016074	-0.699557	1.00761	0.108076	2.61651	-0.605895	-0.754896	-0.777557	0.846941	-0.221596	0.349954	-0.86174	-0.686344	0.525452	-0.846953	1	Neuro system
IQCE	ENSMMUG00000006458	0.68495	0.760587	1.97112	1.91181	-0.522267	-1.08851	-0.662695	-0.156119	-0.733128	-0.0805189	-0.796296	0.173741	-0.405038	-1.05764	1	Neuro system
Metazoa_SRP	ENSMMUG00000065283	2.51248	-0.254117	0.206649	2.0604	-0.453943	-0.515518	-0.515518	-0.515518	-0.515518	-0.515518	-0.515518	0.0526686	-0.515518	-0.515518	1	Neuro system
BRAT1	ENSMMUG00000004087	-0.54205	0.619167	1.30147	2.22971	-0.417186	-0.827452	-0.732686	0.211337	-0.62552	1.40152	-0.911614	-0.515311	-0.762111	-0.429264	1	Neuro system
AMZ1	ENSMMUG00000053148	0.0255246	1.01555	0.602919	3.01445	-0.450592	-0.523973	-0.479569	-0.547952	-0.656539	-0.340949	-0.636968	0.0323517	-0.529463	-0.524785	1	Neuro system
GNA12	ENSMMUG00000006460	0.154377	1.82688	1.71476	1.19436	-0.360911	-0.762754	-0.994631	0.60793	-0.332694	0.155026	-1.10287	-0.257318	-0.712672	-1.12948	1	Neuro system
MMD2	ENSMMUG00000011672	0.000522613	1.50948	0.988324	2.66099	-0.518664	-0.517489	-0.525562	-0.525562	-0.525562	-0.525562	-0.486235	-0.517606	-0.491514	-0.525562	1	Neuro system
SLC29A4	ENSMMUG00000008219	0.262247	0.745784	0.506015	2.8696	-0.758408	-0.768124	-0.668535	-0.758217	0.248961	-0.536941	-0.788614	0.489246	-0.166098	-0.676913	1	Neuro system
TNRC18	ENSMMUG00000008220	-0.37882	0.0545825	1.76805	1.78042	-0.297664	-0.92746	-0.738959	1.67566	-0.564109	0.219389	-0.973903	-0.354371	-0.723947	-0.538878	1	Neuro system
Metazoa_SRP	ENSMMUG00000051215	-0.38797	-0.38797	0.304512	3.37079	-0.38797	-0.38797	-0.38797	-0.38797	-0.38797	-0.38797	0.0047903	-0.38797	-0.38797	0.199613	1	Neuro system
-	ENSMMUG00000052615	-0.738421	0.297961	0.734595	2.49938	-0.068519	-0.887942	-0.662018	1.24424	-0.694648	-0.485053	-0.533993	-0.716095	-0.796013	0.80652	1	Neuro system
FSCN1	ENSMMUG00000004282	0.585554	1.79195	-0.0758019	2.21911	-0.154097	-0.667511	-0.452577	-0.444382	-0.950951	0.712741	-0.859179	-0.887476	-0.839997	0.0226162	1	Neuro system
Metazoa_SRP	ENSMMUG00000063932	-0.269903	0.568495	-0.527531	3.25467	0.203049	-0.349345	-0.387142	-0.0017484	-0.626851	-0.0925128	-0.626851	-0.626851	-0.480543	-0.0369322	1	Neuro system
Metazoa_SRP	ENSMMUG00000056231	-0.468226	0.0160549	0.0414563	3.12826	-0.468226	-0.468226	-0.468226	1.13571	-0.468226	-0.468226	-0.323686	-0.468226	-0.468226	-0.251989	1	Neuro system
ZNF316	ENSMMUG00000049742	0.764411	0.19831	0.888407	2.84883	-0.367281	-0.764939	-0.622664	0.317522	-0.711783	0.0272168	-0.821399	-0.561599	-0.757489	-0.437543	1	Neuro system
-	ENSMMUG00000064966	-0.656172	0.512579	1.49739	1.19609	-0.519938	-0.793387	-0.516946	2.29615	-0.0838421	-0.5469	-0.793387	-0.00486433	-0.793387	-0.793387	1	Neuro system
ZNF853	ENSMMUG00000038892	-0.0762463	0.742138	0.847159	3.02015	-0.428511	-0.463624	-0.408935	0.1473	-0.579785	-0.360744	-0.824139	-0.528304	-0.57611	-0.510347	1	Neuro system
NPTX2	ENSMMUG00000011970	3.27313	0.0208866	0.398405	0.40313	-0.514622	-0.491001	-0.494218	-0.30179	-0.383696	-0.514622	-0.495442	-0.444782	-0.514622	0.0592439	1	Neuro system
TMEM130	ENSMMUG00000012377	1.63641	1.17421	0.406546	2.37647	-0.566697	-0.560782	-0.567679	-0.567679	-0.567679	-0.560596	-0.567679	-0.538223	-0.565255	-0.531373	1	Neuro system
Metazoa_SRP	ENSMMUG00000060361	-0.784106	0.632259	-0.699151	1.50385	-0.0891156	-0.541046	-0.655349	2.51768	-0.090761	0.684677	-0.490449	-0.400541	-0.676944	-0.911005	1	Neuro system
-	ENSMMUG00000054851	-0.980802	1.66669	0.128056	1.42673	-0.522619	-0.563733	-0.87787	1.24328	-0.980802	1.40546	-0.642153	-0.0412647	-0.352549	-0.908426	1	Neuro system
TMEM225B	ENSMMUG00000055483	-0.725374	2.32511	1.00704	1.06413	-0.652367	-1.16383	-0.494397	0.440761	0.886042	-0.711438	-0.68215	0.04422	-0.512138	-0.82561	1	Neuro system
mml-mir-106b	ENSMMUG00000026912	-0.617768	0.917829	-0.617768	0.698081	-0.617768	1.07559	-0.617768	2.65173	-0.617768	-0.617768	-0.617768	0.216685	-0.617768	-0.617768	1	Neuro system
MBLAC1	ENSMMUG00000013453	-0.171704	0.131375	1.57692	2.82892	-0.366174	-0.749683	-0.531466	-0.456109	-0.318572	0.0838464	-0.714058	-0.213101	-0.614009	-0.486185	1	Neuro system
Metazoa_SRP	ENSMMUG00000064256	-0.650756	-0.437878	1.02958	2.99755	-0.450175	-0.416008	-0.447981	0.557906	0.129943	-0.650756	-0.650756	0.0433212	-0.403226	-0.650756	1	Neuro system
LAMTOR4	ENSMMUG00000018401	-0.896245	0.833416	0.995209	1.99308	-0.160806	-0.748677	-1.24339	0.198892	-0.0870194	1.30298	-1.35812	-0.247316	0.250778	-0.832785	1	Neuro system
PPP1R35	ENSMMUG00000012728	-0.171361	-0.349803	0.808616	2.51342	-0.546699	-0.829613	-0.993552	0.749721	-0.46094	1.18689	-0.966957	-0.419174	-0.746785	0.226231	1	Neuro system
Metazoa_SRP	ENSMMUG00000058875	-0.864696	-0.450851	1.74862	1.97229	-0.0848206	-0.408335	-0.470492	1.48499	-0.864696	-0.161715	-0.864696	-0.414924	-0.864696	0.244023	1	Neuro system
-	ENSMMUG00000054611	-0.525074	0.342699	0.634102	3.25009	-0.399283	-0.377855	-0.46149	-0.525074	0.0461304	-0.525074	-0.525074	-0.307434	-0.36984	-0.256825	1	Neuro system
TSC22D4	ENSMMUG00000041566	0.0091117	0.928481	0.106692	2.99491	0.260374	-0.295429	-0.723599	-0.372942	-0.575973	0.35263	-0.81947	-0.445568	-0.655061	-0.764159	1	Neuro system
NYAP1	ENSMMUG00000010463	0.955542	0.371409	1.92416	2.27067	-0.579713	-0.594277	-0.58682	-0.584737	-0.487117	-0.544005	-0.586495	-0.586007	-0.590117	-0.382493	1	Neuro system
GIGYF1	ENSMMUG00000004082	-0.139362	-0.0338258	1.12619	2.49556	-0.356531	-0.813374	-0.53879	1.21469	-0.681634	0.52386	-0.931735	-0.307139	-0.861854	-0.696066	1	Neuro system
AP1S1	ENSMMUG00000010162	1.6862	-0.206466	-0.33397	1.06578	-0.956959	-0.985804	-1.09406	-0.398457	1.07276	-0.0202	-0.865169	0.847076	1.31696	-1.12769	1	Neuro system
VGF	ENSMMUG00000010164	1.47019	-0.0919673	-0.0696118	2.99542	-0.43262	-0.429622	-0.434856	-0.433172	-0.426154	-0.422764	-0.434856	-0.423251	-0.433476	-0.433267	1	Neuro system
NAT16	ENSMMUG00000049346	-0.381745	0.865987	1.64249	2.52475	-0.644007	-0.610025	-0.644007	-0.644007	-0.493322	-0.0681986	-0.644007	0.260262	-0.644007	-0.520169	1	Neuro system
-	ENSMMUG00000058360	0.268401	-0.430298	0.269895	3.2366	0.088643	-0.617714	-0.260672	0.180356	-0.617714	-0.617714	-0.617714	-0.617714	-0.399792	0.135437	1	Neuro system
Metazoa_SRP	ENSMMUG00000059620	-0.549096	2.18077	-0.549096	1.01038	-0.549096	-0.549096	-0.549096	2.03414	-0.549096	-0.549096	0.26567	-0.549096	-0.549096	-0.549096	1	Neuro system
Metazoa_SRP	ENSMMUG00000051969	0.466169	-0.571874	-0.571874	3.19075	0.0487247	-0.329769	-0.571874	-0.26024	-0.571874	0.546943	-0.375291	0.143953	-0.571874	-0.571874	1	Neuro system
RHBDD2	ENSMMUG00000007362	0.317048	1.50545	1.85991	1.8505	-0.346164	-0.634919	-0.976115	-0.428283	-0.564171	-0.0428723	-0.782721	-0.360078	-0.858905	-0.538675	1	Neuro system
CCL26	ENSMMUG00000015735	0.431687	1.74064	-1.17857	0.489072	0.655143	1.50402	-1.17857	-1.17857	-0.286425	0.0611141	0.563985	0.407747	-1.17857	-0.852705	1	Neuro system
Metazoa_SRP	ENSMMUG00000063570	-0.186988	0.145497	0.320351	2.65589	-0.301117	-0.608278	-0.691611	0.965562	1.1555	-0.300332	-0.804755	-0.740209	-0.804755	-0.804755	1	Neuro system
Metazoa_SRP	ENSMMUG00000052527	-0.267261	-0.267261	-0.267261	3.4744	-0.267261	-0.267261	-0.267261	-0.267261	-0.267261	-0.267261	-0.267261	-0.267261	-0.267261	-0.267261	1	Neuro system
-	ENSMMUG00000053080	-0.399757	-0.16731	-0.172049	1.28698	-0.405112	-0.512906	-0.49039	3.07221	-0.327907	-0.293327	-0.549099	-0.469487	-0.551607	-0.0202334	1	Neuro system
FZD9	ENSMMUG00000047984	0.433791	1.93919	-0.154029	2.49418	-0.41359	-0.492358	-0.00265028	-0.0440981	-0.564204	-0.706913	-0.706913	-0.62233	-0.661665	-0.49841	1	Neuro system
DNAJC30	ENSMMUG00000011368	-0.930671	-0.244472	1.0486	2.35275	0.343736	-0.444051	-0.599561	-0.594008	0.971682	0.813406	-0.840588	-0.0982881	-0.385375	-1.39316	1	Neuro system
-	ENSMMUG00000064238	1.86994	0.0423196	0.185777	2.67581	-0.503267	-0.503267	-0.399328	-0.348383	-0.503267	-0.503267	-0.503267	-0.503267	-0.503267	-0.503267	1	Neuro system
LIMK1	ENSMMUG00000003128	0.376953	1.73735	1.31577	1.99919	-0.612136	-0.80841	-0.138357	-0.462004	-0.723929	0.286945	-0.870901	-0.661831	-0.638946	-0.799698	1	Neuro system
CLIP2	ENSMMUG00000048526	0.590503	0.960712	0.446359	2.9891	-0.534273	-0.580542	-0.592323	-0.377823	-0.541964	-0.298761	-0.610701	-0.522083	-0.366637	-0.56157	1	Neuro system
Metazoa_SRP	ENSMMUG00000057136	0.411364	0.144404	-0.0247238	3.35547	-0.3631	-0.422445	-0.422445	-0.422445	-0.422445	-0.422445	-0.422445	-0.217092	-0.34921	-0.422445	1	Neuro system
Metazoa_SRP	ENSMMUG00000052042	0.190516	0.0920742	0.68034	2.51505	0.184647	-0.387356	-0.71584	-0.355726	0.670948	0.842288	-1.10523	-0.19314	-1.22633	-1.19224	1	Neuro system
Metazoa_SRP	ENSMMUG00000064967	-0.480029	0.139711	1.25	2.45769	-0.289535	-0.671895	1.45409	-0.671895	-0.671895	-0.671895	-0.490219	-0.0103469	-0.671895	-0.671895	1	Neuro system
-	ENSMMUG00000053485	0.333295	0.404298	1.84675	2.08195	-0.69619	-0.661267	-0.693947	0.643016	0.42872	-0.901204	-0.901204	-0.664731	-0.901204	-0.318282	1	Neuro system
mml-mir-4650	ENSMMUG00000061805	-0.267261	3.4744	-0.267261	-0.267261	-0.267261	-0.267261	-0.267261	-0.267261	-0.267261	-0.267261	-0.267261	-0.267261	-0.267261	-0.267261	1	Neuro system
Metazoa_SRP	ENSMMUG00000043222	-0.694522	-0.46734	-0.335876	2.80956	-0.480464	-0.444001	-0.694522	1.56275	-0.416804	0.077285	-0.0842736	0.293092	-0.430361	-0.694522	1	Neuro system
-	ENSMMUG00000050820	3.20022	-0.37591	-0.783616	0.148018	-0.655565	-0.483888	-0.265807	0.1809	-0.451349	0.37064	-0.418559	-0.488215	-0.467569	0.490703	1	Neuro system
Metazoa_SRP	ENSMMUG00000063280	1.76807	-0.573526	0.729552	2.25569	0.981954	-0.573526	-0.573526	-0.573526	-0.573526	-0.573526	-0.573526	-0.573526	-0.573526	-0.573526	1	Neuro system
VKORC1L1	ENSMMUG00000021235	-0.746673	-0.66079	-0.724225	1.90434	-0.844633	-0.814886	-0.336405	1.10327	0.507175	-0.437307	-0.460955	0.77254	1.71399	-0.97544	1	Neuro system
-	ENSMMUG00000053738	1.74296	-0.437555	0.271838	2.78401	-0.403343	-0.374779	-0.528651	-0.444724	-0.353473	-0.419877	-0.371841	-0.425967	-0.467563	-0.571032	1	Neuro system
-	ENSMMUG00000064159	-0.433477	0.589021	-0.0489248	3.35197	-0.378019	-0.387069	-0.311722	-0.284762	-0.380015	-0.268536	-0.408082	-0.345311	-0.26933	-0.42574	1	Neuro system
-	ENSMMUG00000054253	0.455594	0.232018	0.948412	1.98623	1.91544	0.175242	-0.804071	-0.804071	-0.623133	-0.804071	-0.804071	-0.562778	-0.804071	-0.506669	1	Neuro system
-	ENSMMUG00000049325	-1.05591	1.00213	-0.406112	2.70629	0.883241	0.00317894	-0.794526	-0.66641	-0.888185	0.109394	-0.0731084	0.286114	-0.417765	-0.688333	1	Neuro system
-	ENSMMUG00000060303	0.381184	-0.658197	1.93193	2.38752	-0.467109	-0.640669	-0.544408	-0.707723	-0.620245	0.113076	-0.48509	-0.27254	0.411083	-0.828808	1	Neuro system
-	ENSMMUG00000058199	-0.966299	1.24262	0.777289	1.55746	-0.619413	-0.966299	-0.615618	1.64654	0.833896	-0.340932	-0.636658	-0.966299	-0.966299	0.0200101	1	Neuro system
COBL	ENSMMUG00000000246	2.80931	0.531843	-0.587551	-0.00765239	0.196036	-0.460863	-0.0216257	0.873826	-0.779096	-1.01475	-0.444915	0.49501	-0.548127	-1.04146	1	Neuro system
-	ENSMMUG00000061445	-0.217681	-0.402035	0.0546929	3.39238	-0.405863	-0.17604	-0.342068	-0.468291	0.0176759	0.206986	-0.408966	-0.468291	-0.31421	-0.468291	1	Neuro system
C3H7orf57	ENSMMUG00000007036	-0.685651	0.639455	2.19073	1.86918	-0.685651	-0.685651	-0.685651	0.0196831	0.731738	-0.685651	-0.685651	0.0344201	-0.685651	-0.685651	1	Neuro system
NACAD	ENSMMUG00000042817	-0.224307	0.828109	1.59341	2.66147	-0.191162	-0.130805	-0.593797	-0.468067	-0.562249	-0.572344	-0.629512	-0.59122	-0.557534	-0.561994	1	Neuro system
-	ENSMMUG00000062797	1.90504	-0.418746	-0.176277	2.73992	-0.418746	-0.418746	-0.418746	-0.418746	-0.418746	-0.418746	-0.281223	-0.418746	-0.418746	-0.418746	1	Neuro system
Metazoa_SRP	ENSMMUG00000055080	2.93018	-0.105795	1.40442	0.413665	-0.510026	-0.510026	-0.381677	-0.510026	-0.180592	-0.510026	-0.510026	-0.510026	-0.510026	-0.510026	1	Neuro system
Metazoa_SRP	ENSMMUG00000053696	-0.365398	-0.365398	1.24775	3.13703	-0.365398	-0.365398	-0.365398	-0.365398	-0.365398	-0.365398	-0.365398	-0.365398	-0.365398	-0.365398	1	Neuro system
-	ENSMMUG00000052530	-0.491223	0.910543	-0.577119	2.96019	-0.352912	-0.620751	-0.601386	0.0440274	-0.124605	0.341358	-0.812348	0.332342	0.0202526	-1.02837	1	Neuro system
-	ENSMMUG00000054924	3.32072	-0.44403	0.201782	0.443139	-0.310018	-0.149989	-0.54744	-0.523859	-0.348584	0.00500068	-0.369435	-0.321095	-0.36064	-0.595549	1	Neuro system
-	ENSMMUG00000065307	-0.0501572	-0.433054	-0.151839	2.99849	-0.402687	-0.40918	-0.488353	-0.401557	1.43671	-0.191753	-0.290906	-0.463391	-0.611393	-0.540922	1	Neuro system
Metazoa_SRP	ENSMMUG00000055023	-0.490131	0.549134	-0.490131	3.07205	-0.490131	-0.490131	0.499811	-0.490131	0.780317	-0.490131	-0.490131	-0.490131	-0.490131	-0.490131	1	Neuro system
POU6F2	ENSMMUG00000017106	0.541465	2.88034	-0.028473	0.0327345	1.21979	-0.343978	-0.743603	-0.100612	-0.743603	-0.743603	-0.662481	-0.15282	-0.532911	-0.622243	1	Neuro system
-	ENSMMUG00000051801	0.143559	-0.443733	0.200106	3.26956	-0.168133	-0.204438	-0.537353	-0.35209	0.513009	-0.21685	-0.603537	-0.377272	-0.560604	-0.662228	1	Neuro system
-	ENSMMUG00000062787	0.0230985	-0.396986	1.80056	2.46331	-0.582213	-0.682151	-0.782535	-0.278739	-0.510566	0.84177	-0.288939	-0.406305	-0.377172	-0.823127	1	Neuro system
-	ENSMMUG00000058423	1.70012	-0.520538	0.882257	2.22266	-0.477263	0.199054	-0.453968	0.40384	-0.353434	-0.386327	-1.06584	-0.155415	-0.826088	-1.16906	1	Neuro system
Metazoa_SRP	ENSMMUG00000050858	0.330482	2.91411	-0.692718	-0.0745807	1.00652	-0.29498	-0.349153	-0.692718	-0.692718	0.532636	-0.692718	0.0912722	-0.692718	-0.692718	1	Neuro system
Metazoa_SRP	ENSMMUG00000063471	-0.903225	0.0116236	-0.537118	2.16169	-0.54032	-0.0112991	-0.901442	0.132079	-0.674651	1.47665	-0.800921	0.811499	-1.14661	0.92205	1	Neuro system
KBTBD2	ENSMMUG00000004944	-0.721899	-0.699652	-0.281511	2.30427	-0.0049847	-0.233564	-0.643402	0.474508	0.514957	1.78415	-1.16037	0.102232	-0.527387	-0.907355	1	Neuro system
-	ENSMMUG00000059061	0.0545352	0.168505	0.627995	0.86128	-0.497218	2.97954	-0.802046	-0.434679	-0.48566	-0.0326833	-0.802046	-0.380123	-0.802046	-0.455356	1	Neuro system
ITPRID1	ENSMMUG00000022484	-0.461867	2.97057	1.08152	0.870495	-0.483108	-0.407131	-0.493671	-0.430018	-0.493671	-0.493671	-0.423403	-0.26826	-0.474117	-0.493671	1	Neuro system
-	ENSMMUG00000055809	-0.450999	2.61268	0.769999	1.76878	-0.502682	-0.442411	-0.502682	-0.444497	-0.502682	-0.502682	-0.502682	-0.29478	-0.502682	-0.502682	1	Neuro system
NEUROD6	ENSMMUG00000022699	3.02621	0.201211	0.732392	-0.272778	-0.519969	-0.440442	-0.519969	0.913158	-0.519969	-0.519969	-0.519969	-0.519969	-0.519969	-0.519969	1	Neuro system
ADCYAP1R1	ENSMMUG00000005299	-0.237459	1.75308	2.15589	1.5222	-0.458855	-0.513553	-0.517926	-0.554801	-0.619414	-0.118574	-0.635804	-0.548376	-0.624343	-0.602075	1	Neuro system
MTURN	ENSMMUG00000012539	3.1586	0.881637	0.170641	0.228969	-0.454072	-0.423316	-0.482143	-0.04027	-0.474436	-0.493154	-0.541987	-0.511722	-0.476614	-0.542131	1	Neuro system
Metazoa_SRP	ENSMMUG00000055749	-0.480439	-0.480439	-0.480439	2.71954	-0.480439	0.205899	-0.480439	-0.480439	1.8021	-0.480439	0.0768487	-0.480439	-0.480439	-0.480439	1	Neuro system
TRIL	ENSMMUG00000020183	-0.183962	0.631287	0.993474	3.02813	-0.482856	-0.595497	-0.62852	-0.389956	0.11146	-0.375165	-0.540804	-0.573335	-0.435689	-0.558571	1	Neuro system
Metazoa_SRP	ENSMMUG00000061832	0.947831	-0.265645	-0.344174	3.07495	0.0421074	-0.407191	-0.638419	0.519043	-0.552975	-0.123931	-0.638419	-0.461172	-0.638419	-0.513583	1	Neuro system
EVX1	ENSMMUG00000056313	-0.273829	-0.273829	-0.187532	3.47348	-0.273829	-0.273829	-0.273829	-0.273829	-0.273829	-0.273829	-0.273829	-0.273829	-0.273829	-0.273829	1	Neuro system
HOXA5	ENSMMUG00000061471	-0.728579	-0.55582	-0.728579	2.62693	-0.710493	-0.728579	0.0485098	1.00158	0.9844	-0.598153	-0.694204	0.502272	0.309301	-0.728579	1	Neuro system
HOXA4	ENSMMUG00000040874	-0.745127	-0.118811	-0.68333	1.93832	-0.708244	-0.745127	0.0565422	2.44975	-0.170898	-0.213178	-0.692552	0.254634	0.0969287	-0.718909	1	Neuro system
NPY	ENSMMUG00000009818	2.12625	1.35339	-0.0454626	1.93022	-0.568601	-0.568601	-0.568601	-0.568601	-0.568601	-0.568601	-0.568601	-0.424542	-0.568601	-0.391044	1	Neuro system
-	ENSMMUG00000056674	-0.732683	1.24986	0.658339	1.53244	-0.317568	-0.732683	-0.313027	-0.732683	-0.732683	2.2608	-0.732683	-0.493277	-0.476544	-0.437606	1	Neuro system
SP8	ENSMMUG00000003722	1.03721	-0.0797067	-0.379305	3.21485	-0.379305	-0.379305	-0.379305	-0.379305	-0.379305	-0.379305	-0.379305	-0.379305	-0.379305	-0.379305	1	Neuro system
ITGB8	ENSMMUG00000006898	-0.397604	1.84493	0.401085	1.79934	0.102151	-0.180539	-0.812208	-0.697069	1.50454	-0.799677	-0.813901	-0.68022	-0.548114	-0.722719	1	Neuro system
TMEM196	ENSMMUG00000009610	0.680628	2.44062	-0.140013	1.85815	-0.65432	-0.65432	-0.65432	-0.65432	-0.388818	-0.65432	-0.65432	-0.536298	0.229576	-0.217922	1	Neuro system
-	ENSMMUG00000053098	0.0655839	-0.539316	1.02997	2.81726	-0.0426268	0.728803	-0.454758	-0.668048	-0.169612	0.241323	-0.933146	-0.561063	-0.531587	-0.98278	1	Neuro system
-	ENSMMUG00000062260	-1.16121	-0.600035	-0.591694	1.65531	-0.670222	-0.586585	2.1224	0.318092	0.112804	1.08573	-0.586958	0.145702	-0.135821	-1.10752	1	Neuro system
DGKB	ENSMMUG00000020418	0.649151	2.50005	1.29123	0.370341	-0.657912	-0.647548	-0.633476	-0.750585	-0.353813	-0.71717	-0.750585	0.884885	-0.493264	-0.691297	1	Neuro system
-	ENSMMUG00000054636	-0.135026	0.0264075	0.21527	3.38486	-0.238431	-0.505275	-0.388847	-0.287999	-0.132508	-0.227684	-0.52207	-0.12509	-0.469016	-0.594597	1	Neuro system
VWDE	ENSMMUG00000030278	-0.383005	2.10629	0.378957	2.42278	-0.623091	-0.623091	-0.56263	-0.623091	-0.15753	-0.623091	-0.566258	-0.209186	-0.254062	-0.28299	1	Neuro system
THSD7A	ENSMMUG00000012694	-0.45497	2.9787	0.375633	1.10858	-0.368485	-0.513034	-0.692839	-0.212715	0.0273285	0.238332	-0.625466	-0.50397	-0.643807	-0.713294	1	Neuro system
-	ENSMMUG00000063606	-0.440363	-0.31489	0.0396037	3.3225	-0.440502	-0.479208	-0.440078	-0.24597	0.274058	0.427935	-0.405644	-0.434562	-0.383675	-0.479208	1	Neuro system
-	ENSMMUG00000056378	0.713586	-0.712863	0.109491	2.65969	0.103358	-0.405577	-0.870126	0.34162	1.23222	-0.555496	-0.660677	-0.200672	-0.828667	-0.925891	1	Neuro system
Metazoa_SRP	ENSMMUG00000060805	0.301185	0.0678233	0.114754	3.26212	-0.405386	0.0775226	-0.542819	-0.509406	0.084561	-0.0669866	-0.760146	-0.502772	-0.39342	-0.72703	1	Neuro system
-	ENSMMUG00000053093	1.19925	-0.383439	0.294415	3.06609	-0.432853	-0.317527	-0.430877	-0.559057	-0.23853	-0.483225	-0.51049	-0.155128	-0.435156	-0.613478	1	Neuro system
CDK6	ENSMMUG00000008698	1.97785	0.03233	-0.747934	0.602458	-0.649648	-0.902815	-1.25458	1.42195	0.294067	0.481966	-1.0255	0.973946	-0.222726	-0.981374	1	Neuro system
-	ENSMMUG00000054411	1.14213	-0.649881	1.27616	2.44861	-0.581424	0.00634809	-0.657741	-0.345334	-0.41058	-0.815499	0.667429	-0.545506	-0.719211	-0.815499	1	Neuro system
-	ENSMMUG00000052773	-0.338047	-0.534128	0.938958	3.19726	-0.436438	-0.0768044	-0.237852	-0.386963	0.0995854	-0.181896	-0.441294	-0.534128	-0.534128	-0.534128	1	Neuro system
-	ENSMMUG00000060885	-0.542763	0.913902	2.09163	2.00988	-0.615157	-0.611712	-0.704097	-0.67748	-0.0847105	0.532813	-0.69034	-0.304032	-0.559531	-0.758402	1	Neuro system
-	ENSMMUG00000064503	-0.353108	-0.459646	-0.0130369	2.69871	-0.353916	-0.447365	-0.351452	-0.579187	1.90507	-0.579187	-0.258079	-0.189431	-0.440188	-0.579187	1	Neuro system
-	ENSMMUG00000050435	-0.386848	0.520165	0.645516	3.22807	-0.468073	-0.445018	-0.484154	-0.407072	-0.146186	-0.200823	-0.484645	-0.417725	-0.472373	-0.480834	1	Neuro system
-	ENSMMUG00000064056	-0.036538	-0.190517	0.00867407	3.44961	-0.360076	-0.357879	-0.342555	-0.30175	-0.222418	-0.341977	-0.328043	-0.273824	-0.335843	-0.366859	1	Neuro system
-	ENSMMUG00000062116	1.16635	-0.484095	1.37488	2.66568	-0.372769	-0.3923	-0.307444	-0.679273	-0.281615	-0.56876	-0.446259	-0.467151	-0.527975	-0.679273	1	Neuro system
Metazoa_SRP	ENSMMUG00000059550	-0.500611	-0.152287	-0.500611	3.08112	-0.500611	-0.500611	-0.500611	-0.500611	1.20262	0.0910716	-0.500611	-0.122048	-0.0955892	-0.500611	1	Neuro system
-	ENSMMUG00000053698	-0.598287	1.75048	0.826653	2.39419	-0.283921	-0.756318	-0.756318	-0.0446745	-0.347727	-0.472438	-0.756318	-0.756318	-0.561995	0.362997	1	Neuro system
-	ENSMMUG00000054290	-0.419049	-0.269824	-0.127325	3.35245	-0.32272	-0.425557	-0.437885	-0.283051	0.587692	-0.341784	-0.405828	-0.315353	-0.158158	-0.433608	1	Neuro system
LHFPL3	ENSMMUG00000004436	-0.0492774	1.36305	0.643732	2.5194	-0.663919	-0.642402	-0.634815	-0.670948	0.98888	-0.358653	-0.63827	-0.577421	-0.586958	-0.6924	1	Neuro system
Metazoa_SRP	ENSMMUG00000061743	-0.162172	0.165495	0.525161	3.27208	-0.456036	-0.456036	-0.456036	-0.456036	0.303754	-0.456036	-0.456036	-0.456036	-0.456036	-0.456036	1	Neuro system
PRKAR2B	ENSMMUG00000015404	0.560549	0.294786	0.380801	1.29728	-1.17133	-1.21618	-1.31517	-0.497051	-0.893217	0.611238	-0.981643	1.51853	1.20873	0.202692	1	Neuro system
-	ENSMMUG00000063722	-0.255982	-0.326192	1.49926	2.29661	0.275446	-0.13129	0.505452	-0.8455	0.795261	-1.00642	-0.90491	-0.0207119	-0.874597	-1.00642	1	Neuro system
-	ENSMMUG00000049886	-0.443545	0.353172	-0.443246	2.58879	-0.161856	-0.538026	-0.5136	1.9312	-0.391702	-0.111658	-0.620629	-0.457808	-0.620629	-0.570458	1	Neuro system
-	ENSMMUG00000055826	-0.904932	0.972127	-0.904932	2.31196	-0.197483	-0.490952	-0.904932	0.160807	0.0129108	1.64585	0.103488	-0.49693	-0.904932	-0.402055	1	Neuro system
Metazoa_SRP	ENSMMUG00000056537	-0.491778	0.541599	-0.491778	3.05021	-0.491778	-0.491778	-0.491778	-0.491778	-0.491778	-0.491778	0.433498	-0.491778	-0.491778	0.892466	1	Neuro system
U1	ENSMMUG00000025345	0.0564545	-0.522979	0.444371	3.15253	-0.522979	-0.522979	-0.522979	0.781673	-0.522979	-0.00254442	-0.248649	-0.522979	-0.522979	-0.522979	1	Neuro system
TMEM229A	ENSMMUG00000049185	-0.0650915	0.938286	0.44478	3.10115	-0.561452	-0.561452	-0.561452	-0.561452	-0.561452	-0.115632	-0.561452	-0.11322	-0.561452	-0.260109	1	Neuro system
GPR37	ENSMMUG00000010664	-0.244022	1.50065	0.161076	2.95218	-0.430864	-0.341296	-0.48432	-0.481993	-0.477955	-0.298994	-0.483286	-0.454659	-0.452503	-0.464013	1	Neuro system
MIR592	ENSMMUG00000027281	1.23748	2.39051	0.912456	1.05297	-0.239313	-0.155858	-0.729233	-0.729233	-0.0936122	-0.729233	-0.729233	-0.729233	-0.729233	-0.729233	1	Neuro system
Metazoa_SRP	ENSMMUG00000054785	0.35118	-0.19198	-0.0345504	3.06401	-0.593555	-0.459615	0.213972	-0.664954	-0.507509	0.81233	-0.264255	-0.0485692	-0.793622	-0.882884	1	Neuro system
Metazoa_SRP	ENSMMUG00000060317	-0.267261	-0.267261	-0.267261	3.4744	-0.267261	-0.267261	-0.267261	-0.267261	-0.267261	-0.267261	-0.267261	-0.267261	-0.267261	-0.267261	1	Neuro system
mml-mir-6133	ENSMMUG00000047605	-0.339774	3.32366	-0.339774	-0.339774	-0.339774	-0.339774	-0.339774	-0.339774	-0.339774	-0.339774	0.753627	-0.339774	-0.339774	-0.339774	1	Neuro system
Metazoa_SRP	ENSMMUG00000050339	-0.692759	0.287447	0.854671	2.66699	-0.692759	0.388149	-0.692759	-0.692759	-0.692759	0.972276	-0.692759	0.372542	-0.692759	-0.692759	1	Neuro system
SLC13A4	ENSMMUG00000016386	0.106824	3.42805	-0.00458843	-0.0448843	-0.345361	-0.344578	-0.281633	-0.356504	-0.291181	-0.305175	-0.438868	-0.358795	-0.381677	-0.381634	1	Neuro system
PTN	ENSMMUG00000011836	0.608486	2.46466	1.10993	1.30546	-0.148812	-0.0697887	-0.760127	-0.692282	-0.703033	-0.388597	-0.764325	-0.530282	-0.715692	-0.715597	1	Neuro system
mml-mir-7186	ENSMMUG00000053261	-0.583392	-0.221458	1.70212	1.89773	-0.583392	-0.583392	-0.583392	-0.583392	-0.583392	0.0314104	-0.583392	-0.583392	-0.583392	1.84072	1	Neuro system
CLEC2L	ENSMMUG00000037714	0.841179	0.931564	2.053	1.96343	-0.590994	-0.582157	-0.583361	-0.590994	-0.581198	-0.550158	-0.590994	-0.590994	-0.590994	-0.537322	1	Neuro system
HIPK2	ENSMMUG00000002481	2.52899	1.65669	0.298356	0.715609	-0.341868	-0.570703	-0.758612	-0.516489	-0.638855	-0.46558	-0.521708	-0.308571	-0.0907863	-0.986471	1	Neuro system
Metazoa_SRP	ENSMMUG00000052228	-0.459814	0.258258	-0.459814	3.23207	-0.459814	-0.459814	-0.459814	-0.459814	-0.459814	0.759945	-0.459814	-0.0696093	-0.0423364	-0.459814	1	Neuro system
DENND2A	ENSMMUG00000042299	-0.281913	0.942845	-0.333289	1.36082	0.811261	-0.349586	-0.809197	1.32303	-0.802056	1.56773	-1.24941	-0.592421	-0.241872	-1.34594	1	Neuro system
Metazoa_SRP	ENSMMUG00000056284	-0.61568	-0.216417	-0.61568	2.8056	-0.114082	-0.46892	-0.362137	1.65122	-0.452987	0.288603	-0.496515	-0.326397	-0.460929	-0.61568	1	Neuro system
EPHB6	ENSMMUG00000016218	2.81987	-0.111	-0.547301	0.426882	-0.529293	-0.621019	-0.611233	-0.503291	0.0266714	1.45899	-0.617156	0.0325534	-0.625046	-0.599622	1	Neuro system
Metazoa_SRP	ENSMMUG00000059956	0.870679	-0.585856	1.84579	2.05392	-0.585856	-0.585856	-0.585856	-0.585856	-0.585856	-0.585856	-0.585856	1.08817	-0.585856	-0.585856	1	Neuro system
U6	ENSMMUG00000063823	0.58405	-0.412002	-0.412002	3.19842	-0.412002	0.749553	-0.412002	-0.412002	-0.412002	-0.412002	-0.412002	-0.412002	-0.412002	-0.412002	1	Neuro system
OR2A14	ENSMMUG00000056692	-0.447395	-0.0188018	-0.774875	2.30123	0.063984	0.0283521	-0.632007	0.256092	-0.343396	2.10371	-0.920762	-0.363466	-0.37591	-0.876763	1	Neuro system
Metazoa_SRP	ENSMMUG00000062752	0.864111	0.648716	0.399424	3.01446	-0.534664	-0.534664	-0.534664	-0.114734	-0.534664	-0.534664	-0.534664	-0.534664	-0.534664	-0.534664	1	Neuro system
Y_RNA	ENSMMUG00000027349	-0.265652	2.55067	0.463199	0.724424	-0.577677	-0.684976	1.26432	-0.126204	0.51847	-0.709482	-0.77096	-0.772208	-0.778414	-0.835505	1	Neuro system
Metazoa_SRP	ENSMMUG00000062417	-0.378423	1.57379	-0.378423	2.96728	-0.378423	-0.378423	-0.378423	-0.378423	-0.378423	-0.378423	-0.378423	-0.378423	-0.378423	-0.378423	1	Neuro system
Metazoa_SRP	ENSMMUG00000039557	0.377031	0.359197	2.06072	2.15644	-0.631408	0.284916	-0.811871	-0.446594	-0.404521	-0.338449	-0.822938	-0.0492692	-0.996327	-0.736931	1	Neuro system
U6	ENSMMUG00000060626	0.0920778	0.817276	0.527494	2.97789	-0.558307	-0.558307	-0.558307	-0.558307	-0.558307	0.610016	-0.558307	-0.558307	-0.558307	-0.558307	1	Neuro system
KRBA1	ENSMMUG00000017159	0.142101	0.236515	1.59592	2.377	-0.290735	-0.714433	-0.625711	-0.0233462	-0.545126	0.965289	-1.0227	-0.717166	-0.659676	-0.717928	1	Neuro system
SSPO	ENSMMUG00000048892	0.343468	0.864442	1.21773	2.6959	-0.534878	-0.788379	-0.838393	-0.547974	0.0360276	-0.0777033	-0.549066	-0.670821	-0.737611	-0.412739	1	Neuro system
-	ENSMMUG00000002273	0.606649	1.35456	1.79835	1.99998	-0.441186	-0.642053	-0.681772	-0.480233	-0.267555	-0.414298	-0.77816	-0.641403	-0.670674	-0.742208	1	Neuro system
-	ENSMMUG00000039693	0.0303081	0.955362	0.934523	2.75651	-0.307123	-0.573959	-0.654425	-0.346238	-0.698302	0.546651	-0.86303	-0.438293	-0.57364	-0.768344	1	Neuro system
ATG9B	ENSMMUG00000054441	0.455268	0.741988	1.50775	1.9706	-0.401994	-0.68971	-0.923667	0.263042	-0.765267	1.10209	-0.927002	-0.598772	-0.911401	-0.822929	1	Neuro system
SLC4A2	ENSMMUG00000020456	-1.14727	0.443546	-0.40241	1.98029	-0.319311	-0.878458	-0.849907	2.08271	0.556045	0.0824864	-0.255773	0.114768	-0.496165	-0.910557	1	Neuro system
Metazoa_SRP	ENSMMUG00000055422	0.591653	-0.575071	0.723473	2.94914	-0.575071	-0.575071	-0.575071	0.592481	-0.575071	-0.575071	-0.575071	0.318889	-0.575071	-0.575071	1	Neuro system
H2BE1	ENSMMUG00000049654	-1.02343	-0.187474	0.956128	2.55821	-0.235766	-0.101592	0.569133	-0.43014	-0.512473	1.10658	-1.02343	-0.114902	-0.537415	-1.02343	1	Neuro system
-	ENSMMUG00000019832	-1.10673	1.18048	-0.745818	1.89076	-1.05994	-0.373846	-1.09811	1.17367	0.296764	0.842375	-0.829968	0.304575	0.359616	-0.833813	1	Neuro system
XRCC2	ENSMMUG00000002878	-1.13111	-0.504647	0.359744	2.41912	0.136857	-0.188974	-0.725149	0.982241	-0.738507	1.23712	-1.31586	-0.0286351	-0.200948	-0.301252	1	Neuro system
Metazoa_SRP	ENSMMUG00000043491	-0.612884	0.223405	0.971393	3.11351	-0.140097	-0.244002	0.0243947	-0.612884	-0.40842	-0.0446564	-0.612884	-0.431106	-0.612884	-0.612884	1	Neuro system
-	ENSMMUG00000052584	-0.488624	-0.461295	0.88719	2.76796	-0.490323	-0.779083	-0.485143	-0.250535	1.08379	0.458821	-0.663836	-0.235632	-0.379501	-0.963789	1	Neuro system
NOM1	ENSMMUG00000039033	-1.1591	0.0904041	1.00878	1.91398	0.0797788	-0.769396	-0.85142	0.729869	-0.408827	1.77862	-0.82529	-0.118842	-0.674313	-0.794251	1	Neuro system
MNX1	ENSMMUG00000056863	-0.515961	-0.515961	-0.515961	2.79773	-0.515961	-0.515961	-0.515961	-0.515961	-0.515961	-0.515961	-0.515961	1.06009	1.17024	0.13155	1	Neuro system
PTPRN2	ENSMMUG00000022806	1.09367	0.571018	1.37751	1.63836	-0.730568	-0.728903	-0.734164	-0.721976	-0.734164	-0.617477	-0.73331	-0.594181	1.58444	-0.670263	1	Neuro system
-	ENSMMUG00000051283	0.0257901	0.663063	1.49409	1.97768	-0.773022	-0.773022	-0.773022	-0.533208	-0.773022	-0.486031	-0.773022	-0.313976	1.5844	-0.546706	1	Neuro system
PLEKHG4B	ENSMMUG00000064521	0.272082	1.6568	1.50662	1.09337	-0.832296	-0.92956	-0.865541	0.635433	0.412671	-0.969788	-0.969788	-0.731904	-0.969788	0.691684	1	Neuro system
-	ENSMMUG00000052291	1.11771	1.79506	1.51838	1.47605	-0.556589	-0.614337	-0.612436	0.0586633	-0.663882	-0.75987	-0.77776	-0.506423	-0.660182	-0.81438	1	Neuro system
-	ENSMMUG00000039386	1.3546	0.838239	0.898961	2.48974	-0.497382	-0.624935	-0.646215	-0.0470574	-0.662898	-0.680496	-0.667606	-0.469284	-0.605171	-0.680496	1	Neuro system
TPPP	ENSMMUG00000061096	0.940341	0.823854	1.19776	2.59713	-0.490511	-0.590129	-0.546991	-0.22813	-0.658026	-0.62509	-0.678639	-0.478309	-0.575934	-0.687331	1	Neuro system
TERT	ENSMMUG00000010940	-0.0281114	2.97142	-0.589286	1.19056	-0.589286	-0.589286	-0.589286	-0.589286	-0.589286	-0.337269	-0.589286	-0.0249374	0.445788	-0.0924437	1	Neuro system
SLC6A3	ENSMMUG00000005198	-0.357997	3.35036	-0.351372	-0.357997	-0.346135	-0.342572	-0.355332	-0.318286	-0.209225	-0.331859	-0.319169	0.649956	-0.357997	-0.352376	1	Neuro system
C5orf38	ENSMMUG00000015889	-0.657593	0.42851	-0.282294	2.17026	-0.596199	-0.694642	-0.694642	1.88208	0.0557161	-0.650274	-0.612786	-0.694642	1.00616	-0.659654	1	Neuro system
IRX1	ENSMMUG00000002613	-0.516394	0.242443	0.095664	1.26113	-0.49766	-0.516394	-0.516394	2.99716	0.0102136	-0.516394	-0.516394	-0.516394	-0.516394	-0.4942	1	Neuro system
-	ENSMMUG00000064022	-0.412838	-0.39812	0.719724	3.04154	-0.604992	-0.221108	-0.34652	-0.572708	0.985347	-0.323972	-0.547584	-0.374627	-0.275403	-0.668739	1	Neuro system
-	ENSMMUG00000058512	0.284591	-0.351715	1.76281	2.71554	-0.534928	-0.411627	-0.450649	-0.575202	-0.0629195	-0.40391	-0.543041	-0.133398	-0.597429	-0.698129	1	Neuro system
Metazoa_SRP	ENSMMUG00000055564	-0.487452	0.55556	-0.487452	3.08756	-0.487452	-0.487452	0.506058	-0.487452	-0.487452	-0.487452	-0.487452	-0.487452	0.725335	-0.487452	1	Neuro system
Metazoa_SRP	ENSMMUG00000063213	3.09694	-0.534825	0.273593	0.342785	-0.534825	-0.534825	0.928521	-0.171391	-0.534825	-0.534825	-0.534825	-0.534825	-0.534825	-0.191847	1	Neuro system
C6H5orf49	ENSMMUG00000018745	1.08297	0.452666	0.557615	2.22469	-0.920596	-1.09097	-0.384683	-0.835674	1.33545	-0.303929	-0.67379	-0.517971	0.0121777	-0.937963	1	Neuro system
-	ENSMMUG00000064218	0.0536834	-0.455887	0.162663	3.38968	-0.0774165	-0.441844	-0.462374	-0.010529	-0.341936	-0.2443	-0.408992	-0.29547	-0.274704	-0.592572	1	Neuro system
-	ENSMMUG00000059787	-0.168967	-0.470878	0.285171	3.35933	-0.0948391	-0.382859	-0.470878	-0.470878	0.212143	-0.199708	-0.185002	-0.470878	-0.470878	-0.470878	1	Neuro system
ROPN1L	ENSMMUG00000060969	1.31975	0.602721	1.27521	2.36288	-0.766989	-0.515251	-0.694506	-0.226932	-0.0228112	-0.766989	-0.698854	-0.436185	-0.766989	-0.665057	1	Neuro system
Metazoa_SRP	ENSMMUG00000059223	-0.364355	0.711044	-0.0248132	3.32167	-0.364355	-0.364355	-0.364355	-0.364355	-0.364355	-0.364355	-0.364355	-0.364355	-0.364355	-0.364355	1	Neuro system
-	ENSMMUG00000059412	-0.223218	0.042046	1.66068	1.39626	0.028809	-0.277447	-0.418457	-0.428822	-0.0533175	-0.68763	-1.053	2.04049	-1.05205	-0.974339	1	Neuro system
Metazoa_SRP	ENSMMUG00000055497	-0.975192	-0.108002	-0.63996	2.26328	-0.277273	-0.0235491	-1.10737	1.95055	0.202416	-0.409037	0.525599	-0.118913	-0.446546	-0.836011	1	Neuro system
MARCHF11	ENSMMUG00000007069	0.314676	0.0151967	1.66128	2.54356	-0.357733	-0.503606	-0.650401	-0.650401	-0.48767	-0.650401	-0.650401	-0.650401	-0.650401	0.716706	1	Neuro system
Y_RNA	ENSMMUG00000064771	-0.241235	0.158463	1.06883	2.78381	0.350735	-0.227334	-0.922997	-0.283391	0.288863	0.301691	-0.922997	-0.62916	-0.922997	-0.802276	1	Neuro system
BASP1	ENSMMUG00000061751	3.04313	0.0594105	0.0262191	1.31553	-0.477003	-0.476488	-0.487144	-0.408943	-0.487956	-0.300495	-0.462805	-0.456399	-0.420666	-0.4664	1	Neuro system
-	ENSMMUG00000063679	0.366368	-0.37196	0.699131	3.03343	0.0328447	-0.825292	-0.177963	-0.788454	0.3262	0.0343812	-0.641106	-0.32147	-0.412545	-0.953563	1	Neuro system
CDH12	ENSMMUG00000015092	3.00077	1.35065	0.229865	-0.500873	-0.500873	-0.500873	-0.500873	-0.500873	-0.217949	-0.500873	-0.500873	-0.165497	-0.500873	-0.190851	1	Neuro system
-	ENSMMUG00000062040	0.783467	-0.318669	-0.0786084	3.27679	-0.182437	-0.527875	-0.331408	-0.206095	-0.193343	-0.313517	-0.442876	-0.353709	-0.524652	-0.58707	1	Neuro system
-	ENSMMUG00000054640	3.37524	0.210998	-0.294489	0.356419	-0.379191	-0.379191	-0.379191	-0.379191	-0.379191	-0.379191	-0.379191	-0.379191	-0.379191	-0.235449	1	Neuro system
-	ENSMMUG00000055028	-0.533499	-0.675075	0.506711	2.40397	-0.675075	-0.675075	-0.532462	-0.0375319	1.70422	0.850848	-0.675075	-0.512359	-0.675075	-0.474522	1	Neuro system
RXFP3	ENSMMUG00000052619	-0.608644	2.39172	-0.134984	1.70526	-0.608644	-0.608644	-0.608644	-0.608644	-0.425255	1.17516	-0.608644	-0.445603	-0.608644	-0.00578141	1	Neuro system
-	ENSMMUG00000030178	-0.293118	0.790935	-0.105091	2.16116	-0.709797	-1.08279	-1.02525	1.79071	-0.198516	0.411757	-0.827288	0.271463	-0.544076	-0.640102	1	Neuro system
-	ENSMMUG00000052836	-0.767025	-0.498449	-0.186204	2.9196	-0.0686451	-0.558766	-0.581333	0.103026	1.06097	0.638939	-0.285753	-0.213851	-0.612476	-0.950036	1	Neuro system
Metazoa_SRP	ENSMMUG00000056658	-0.642008	-0.458698	-0.112662	1.88112	-0.493242	-0.221422	-0.525051	2.33846	0.60025	0.365387	-0.94959	-0.14683	-0.685841	-0.949873	1	Neuro system
-	ENSMMUG00000052974	1.23057	-0.502234	-0.124593	3.022	-0.57704	-0.328523	-0.533987	0.0680504	-0.0568444	0.0440504	-0.604851	-0.381731	-0.468226	-0.786643	1	Neuro system
-	ENSMMUG00000063072	-0.239314	-0.408502	-0.497992	3.17853	-0.420639	-0.513292	-0.54583	0.248961	-0.315067	0.841412	0.150994	-0.28647	-0.574186	-0.618605	1	Neuro system
-	ENSMMUG00000060622	0.121307	-0.524823	0.522486	3.10302	-0.00531699	-0.0166056	-0.620404	-0.353028	0.707274	-0.49014	-0.669462	-0.454652	-0.532947	-0.786706	1	Neuro system
-	ENSMMUG00000053009	-0.0882477	-0.624663	-0.0735662	2.96492	-0.460202	1.49257	-0.499968	-0.314973	-0.251264	-0.328173	-0.390235	-0.387542	-0.472446	-0.566211	1	Neuro system
-	ENSMMUG00000050416	-0.631379	-0.0316182	2.01974	2.24665	-0.518357	-0.631379	-0.060083	-0.631379	-0.631379	-0.631379	-0.309167	0.933008	-0.491902	-0.631379	1	Neuro system
-	ENSMMUG00000062203	0.404184	-0.536107	0.543058	3.13532	-0.280628	-0.824961	-0.274672	0.405057	-0.118744	-0.334298	-0.307688	-0.354067	-0.824961	-0.631496	1	Neuro system
-	ENSMMUG00000050786	1.436	-0.349719	0.971975	2.73894	-0.414817	-0.439179	-0.513374	-0.539055	-0.355547	-0.434467	-0.377377	-0.556643	-0.552626	-0.614112	1	Neuro system
Metazoa_SRP	ENSMMUG00000054104	-0.302391	0.18354	-0.302391	3.44515	-0.302391	-0.302391	-0.302391	-0.302391	-0.302391	-0.302391	-0.302391	-0.302391	-0.302391	-0.302391	1	Neuro system
-	ENSMMUG00000054721	-0.484341	0.345018	0.369716	3.01824	-0.549162	-0.580298	-0.739498	0.922822	0.187511	-0.689074	-0.501312	-0.289731	-0.568125	-0.44176	1	Neuro system
Metazoa_SRP	ENSMMUG00000050158	-0.456014	-0.456014	-0.456014	2.68833	-0.456014	-0.456014	-0.456014	-0.456014	1.78684	-0.456014	-0.456014	0.540986	-0.456014	-0.456014	1	Neuro system
-	ENSMMUG00000054780	-0.325516	-0.637699	0.346925	3.02867	-0.044088	-0.0922366	-0.587524	-0.35562	1.06938	-0.0711784	-0.720127	-0.220265	-0.574253	-0.816459	1	Neuro system
HTR1A	ENSMMUG00000001789	2.93274	0.52504	-0.434351	1.39534	-0.481066	-0.481066	-0.481066	-0.397061	-0.300197	-0.380535	-0.454571	-0.481066	-0.481066	-0.481066	1	Neuro system
SGTB	ENSMMUG00000016521	2.74678	-0.100821	0.115707	1.8124	-0.336229	-0.383229	-0.421595	-0.459022	-0.482755	-0.456354	-0.57653	-0.451828	-0.419333	-0.587193	1	Neuro system
Metazoa_SRP	ENSMMUG00000051887	-0.267261	-0.267261	-0.267261	3.4744	-0.267261	-0.267261	-0.267261	-0.267261	-0.267261	-0.267261	-0.267261	-0.267261	-0.267261	-0.267261	1	Neuro system
-	ENSMMUG00000038355	-0.680788	1.0388	1.14114	1.4337	0.129658	-0.115984	1.91939	-0.465458	0.0754215	-0.94357	-0.615632	-0.775601	-1.0774	-1.06367	1	Neuro system
Metazoa_SRP	ENSMMUG00000054525	-0.162941	-0.578645	-0.578645	3.1884	-0.578645	-0.578645	-0.159895	0.0453545	-0.04124	-0.578645	-0.185019	0.854689	-0.0674735	-0.578645	1	Neuro system
Metazoa_SRP	ENSMMUG00000051600	0.257426	0.508998	-0.20936	3.22038	-0.584541	-0.677721	-0.583522	-0.116234	0.168522	-0.34175	-0.146433	-0.140329	-0.677721	-0.677721	1	Neuro system
-	ENSMMUG00000053770	-0.57553	0.386545	0.73074	2.66861	-0.819722	-0.356952	-0.743638	-0.159634	-0.332534	0.893099	-1.04533	0.661367	-0.342387	-0.964631	1	Neuro system
-	ENSMMUG00000061071	-0.349875	-0.414026	0.116607	3.27432	-0.119228	-0.388757	0.433369	-0.310862	0.141821	0.0363592	-0.439757	-0.659991	-0.659991	-0.659991	1	Neuro system
FOXD1	ENSMMUG00000040510	-0.103787	3.44348	-0.445913	-0.368406	-0.275462	-0.146683	-0.273597	-0.317525	-0.0589127	-0.369091	-0.445913	-0.101852	-0.393326	-0.143008	1	Neuro system
-	ENSMMUG00000059013	-1.07229	1.06074	-1.07229	1.36477	1.60746	0.103795	-1.07229	0.946167	-1.07229	-0.468408	0.519292	0.473183	-0.245545	-1.07229	1	Neuro system
ENC1	ENSMMUG00000019996	3.3643	-0.416227	-0.343264	-0.378877	-0.439815	-0.453113	-0.580564	0.351637	-0.100765	0.00875861	-0.411222	-0.0615313	-0.0980664	-0.441246	1	Neuro system
SV2C	ENSMMUG00000019887	-0.0906888	1.8247	0.352026	2.68911	-0.495422	-0.499011	-0.488863	-0.512593	-0.513247	-0.506032	-0.517302	-0.365881	-0.386156	-0.49064	1	Neuro system
ZBED3	ENSMMUG00000021357	-0.82067	-0.238999	-0.0224596	2.06967	0.096651	-0.758176	-0.932818	2.37517	0.0149903	-0.57954	-0.492999	-0.508846	0.0237479	-0.225724	1	Neuro system
Metazoa_SRP	ENSMMUG00000055418	-1.0017	-0.288405	-1.0017	2.66563	0.678524	0.178164	0.696907	0.517007	-0.129733	0.209945	-0.682362	0.161128	-1.0017	-1.0017	1	Neuro system
OTP	ENSMMUG00000039760	-0.384057	2.85663	-0.384057	1.75205	-0.384057	-0.384057	-0.384057	-0.384057	-0.384057	-0.384057	-0.384057	-0.384057	-0.384057	-0.384057	1	Neuro system
-	ENSMMUG00000060083	0.510616	-0.582454	-0.00218763	3.25493	0.140292	-0.223952	-0.441881	-0.40708	-0.263105	-0.473941	0.166176	-0.653371	-0.286276	-0.73777	1	Neuro system
-	ENSMMUG00000054810	0.105617	-0.133998	-0.247616	3.44887	-0.285613	-0.34279	-0.331545	-0.338351	-0.264013	-0.298727	-0.314323	-0.297316	-0.341948	-0.358245	1	Neuro system
-	ENSMMUG00000051429	-0.203984	0.277946	-0.124882	3.41407	-0.387522	-0.387522	-0.387522	-0.387522	-0.387522	-0.387522	-0.114422	-0.297117	-0.387522	-0.238953	1	Neuro system
Metazoa_SRP	ENSMMUG00000054808	-0.366489	-0.366489	-0.366489	3.40754	-0.366489	-0.0195771	-0.366489	0.0800516	-0.366489	-0.366489	0.196877	-0.366489	-0.366489	-0.366489	1	Neuro system
EDIL3	ENSMMUG00000007661	-0.128205	1.97486	0.323663	2.43931	-0.672934	-0.107732	-0.791653	-0.0599795	0.0287813	-0.491053	-0.805237	-0.365871	-0.615296	-0.72865	1	Neuro system
-	ENSMMUG00000051689	0.265155	-0.522162	0.482667	3.28679	-0.184318	-0.44794	-0.57976	-0.00795881	-0.22983	-0.233189	-0.491569	-0.222604	-0.435307	-0.679977	1	Neuro system
U3	ENSMMUG00000053815	-0.367716	0.141725	-0.367716	3.41562	-0.367716	-0.0868267	-0.367716	0.11436	-0.367716	-0.367716	-0.367716	-0.275438	-0.367716	-0.367716	1	Neuro system
-	ENSMMUG00000049380	1.18727	2.9268	0.435994	0.516677	-0.506674	-0.506674	-0.506674	-0.506674	-0.506674	-0.506674	-0.506674	-0.506674	-0.506674	-0.506674	1	Neuro system
-	ENSMMUG00000063160	0.506737	-0.573547	0.26695	3.25436	-0.579867	-0.682948	-0.526635	-0.294732	-0.281737	-0.311279	0.198661	-0.147906	-0.364927	-0.463129	1	Neuro system
-	ENSMMUG00000053232	-0.372316	-0.440252	0.166343	2.31909	1.99811	0.829734	-0.370629	-0.602615	-0.602615	-0.602615	-0.602615	-0.514386	-0.602615	-0.602615	1	Neuro system
-	ENSMMUG00000064649	0.223008	-0.47327	0.293596	2.81965	-0.08848	-0.428575	-0.908325	-0.753943	0.421256	-0.723573	1.13678	-0.0808839	-0.528922	-0.908325	1	Neuro system
-	ENSMMUG00000053899	-0.359867	-0.114167	0.248031	3.36321	-0.146335	-0.112782	-0.526359	-0.599165	-0.145006	-0.155073	-0.399056	0.0442109	-0.494431	-0.603209	1	Neuro system
Metazoa_SRP	ENSMMUG00000052565	-0.890396	-0.890396	1.41384	2.44488	0.026459	-0.353878	-0.426953	-0.890396	0.299129	-0.0639412	0.416518	0.695918	-0.890396	-0.890396	1	Neuro system
PCSK1	ENSMMUG00000005134	3.11197	-0.0899265	-0.349266	0.0823347	-0.505453	-0.505453	-0.486605	-0.505453	-0.489327	-0.494249	-0.505453	1.0859	0.138765	-0.487782	1	Neuro system
-	ENSMMUG00000065221	-0.864341	0.242634	1.22915	2.15302	0.297724	-0.118721	-0.0668985	-0.5621	-0.868825	0.898543	-0.971573	0.81468	-0.902902	-1.2804	1	Neuro system
-	ENSMMUG00000059177	-0.419141	2.01398	-0.0150682	2.61915	-0.488792	-0.49387	-0.472966	-0.453884	-0.48192	-0.109221	-0.489941	-0.280914	-0.497641	-0.429775	1	Neuro system
-	ENSMMUG00000051990	2.22228	2.10199	0.0298171	0.891285	-0.560648	-0.581669	-0.597242	-0.572184	-0.519552	-0.240392	-0.552983	-0.522416	-0.576715	-0.52157	1	Neuro system
-	ENSMMUG00000064015	-1.08004	1.53467	1.27869	1.48058	-0.904065	-0.668136	-0.368436	-0.549842	1.43138	-0.762791	-0.578358	-0.674084	0.440119	-0.579684	1	Neuro system
FAM174A	ENSMMUG00000054789	-0.424173	0.617504	1.38801	2.17534	0.438574	-0.0951782	-0.566362	-1.18928	0.0129782	-0.465133	-0.85757	0.20121	0.403653	-1.63956	1	Neuro system
-	ENSMMUG00000057827	0.348332	-0.114205	0.122881	3.00183	-0.506124	-0.618151	-0.500547	0.00800797	0.0863688	0.822074	-1.01587	-0.231917	-0.38681	-1.01587	1	Neuro system
Metazoa_SRP	ENSMMUG00000044415	-0.0380634	0.29175	-0.333852	3.41868	-0.333852	-0.333852	-0.333852	-0.333852	-0.333852	-0.333852	-0.333852	-0.333852	-0.333852	-0.333852	1	Neuro system
FBXL17	ENSMMUG00000013183	0.511349	0.129258	1.94532	2.07701	-0.0225449	-0.889208	-0.100496	-0.824613	-0.510653	0.0779276	-0.730728	0.160595	-0.339944	-1.48328	1	Neuro system
-	ENSMMUG00000060331	-0.623153	-0.187802	2.16724	2.41761	0.18216	-0.286405	-0.622165	-0.757934	-0.235216	-0.273704	-0.375065	-0.603027	-0.426466	-0.376078	1	Neuro system
-	ENSMMUG00000042638	1.63556	-0.359286	-0.284843	2.8413	-0.447007	-0.551835	-0.482837	-0.427766	-0.0664911	0.206253	-0.454373	-0.50973	-0.503757	-0.595192	1	Neuro system
-	ENSMMUG00000045851	0.534708	2.71094	0.257898	0.774602	-0.0767947	-0.482622	-0.8333	-0.776979	0.89511	-0.26517	-0.912202	-0.882654	-0.129984	-0.813548	1	Neuro system
-	ENSMMUG00000055720	-0.283543	2.0141	0.482667	2.40286	0.000469348	-0.713404	-0.42473	-0.713404	0.0275379	-0.456009	-0.713404	-0.548721	-0.361017	-0.713404	1	Neuro system
-	ENSMMUG00000063399	-0.878711	0.767273	-0.775073	2.33323	-0.570763	0.410697	-0.5657	0.593086	-0.233017	-0.199263	-1.03351	1.45736	-0.272093	-1.03351	1	Neuro system
-	ENSMMUG00000055101	-0.557365	-0.30992	-0.297933	3.06744	-0.156697	-0.144121	-0.336384	-0.308833	0.816555	0.748272	-0.603208	-0.511051	-0.714975	-0.691783	1	Neuro system
-	ENSMMUG00000056057	-0.44333	-0.877093	-0.34498	2.88216	-0.154226	0.40767	-0.7337	0.689239	0.744251	0.094696	-0.677818	0.0524327	-0.685015	-0.954285	1	Neuro system
-	ENSMMUG00000063354	-0.0692721	-0.810032	1.04499	2.88192	-0.625504	0.701695	-0.436939	0.301897	-0.570626	-0.810032	-0.108614	-0.597189	-0.354594	-0.547696	1	Neuro system
-	ENSMMUG00000062842	-0.373997	-0.597155	-0.335058	3.02912	0.540544	-0.584673	-0.371473	-0.0288601	1.06354	-0.0995348	-0.501083	-0.586608	-0.436114	-0.718645	1	Neuro system
-	ENSMMUG00000060057	0.398757	-0.693284	-0.274028	2.77599	0.394156	-0.244712	0.223065	-0.611774	1.25049	-0.227395	-0.539605	-0.676413	-0.887622	-0.887622	1	Neuro system
-	ENSMMUG00000060546	-0.150027	0.125608	0.0154674	3.41091	-0.397226	-0.253089	-0.397226	-0.397226	-0.397226	-0.397226	-0.397226	0.0289413	-0.397226	-0.397226	1	Neuro system
-	ENSMMUG00000046228	-0.314931	0.206142	-0.433693	1.96357	-0.452812	-0.582798	-0.636383	2.58843	-0.0430083	-0.204269	-0.641024	-0.417582	-0.560278	-0.471368	1	Neuro system
PHAX	ENSMMUG00000016683	-0.0357985	0.151156	1.49138	2.5544	-0.445391	-0.432757	-1.03214	-0.795402	0.145879	-0.175173	-0.519679	0.229782	0.1811	-1.31735	1	Neuro system
-	ENSMMUG00000057656	-0.641348	0.703948	-0.362517	2.33892	1.22468	0.884946	-1.05784	-0.74525	-0.788629	-0.870799	-0.860655	-0.100473	-0.28963	0.564644	1	Neuro system
Metazoa_SRP	ENSMMUG00000062640	-0.362378	1.18197	-0.362378	3.16656	-0.362378	-0.362378	-0.362378	-0.362378	-0.362378	-0.362378	-0.362378	-0.362378	-0.362378	-0.362378	1	Neuro system
-	ENSMMUG00000058082	-0.622918	-0.416667	0.739396	2.89718	-0.507781	-0.635089	-0.514251	0.28644	0.0660103	0.956837	-0.68183	-0.109432	-0.604843	-0.853055	1	Neuro system
PDLIM4	ENSMMUG00000009298	-0.918291	1.71708	-0.390037	1.7868	-0.165774	-0.825778	-0.287664	-0.884601	-0.858557	-0.119559	-1.23458	1.111	0.213587	0.856375	1	Neuro system
SEPTIN8	ENSMMUG00000010309	-0.288855	1.09423	0.836287	2.36379	-0.571617	-0.845077	-1.05846	0.293845	0.314244	-0.63555	-1.04284	0.683555	-0.0852419	-1.05832	1	Neuro system
Metazoa_SRP	ENSMMUG00000053169	-0.267261	-0.267261	-0.267261	3.4744	-0.267261	-0.267261	-0.267261	-0.267261	-0.267261	-0.267261	-0.267261	-0.267261	-0.267261	-0.267261	1	Neuro system
-	ENSMMUG00000054330	-0.221412	0.320844	1.66212	2.65104	-0.596405	-0.577442	-0.615047	-0.0467897	-0.673744	-0.613284	0.387484	-0.345176	-0.643078	-0.689108	1	Neuro system
-	ENSMMUG00000053208	0.131343	-0.7408	0.0601342	2.90217	-0.241337	-0.184434	-0.475925	0.0218246	-0.0824684	0.657724	-1.02079	0.757675	-0.751684	-1.03343	1	Neuro system
Metazoa_SRP	ENSMMUG00000063940	2.576	-0.666346	0.106943	1.85208	-0.666346	-0.666346	-0.666346	0.376577	-0.366948	-0.250316	-0.44705	-0.133989	-0.381563	-0.666346	1	Neuro system
Metazoa_SRP	ENSMMUG00000055784	0.884204	-0.674951	1.92802	2.15081	0.360768	-0.674951	-0.674951	-0.674951	-0.674951	0.258648	-0.182836	-0.674951	-0.674951	-0.674951	1	Neuro system
Metazoa_SRP	ENSMMUG00000052846	0.54881	-0.474894	-0.474894	3.23576	0.0351278	-0.474894	-0.474894	-0.474894	-0.474894	0.444575	0.00977345	-0.474894	-0.474894	-0.474894	1	Neuro system
SLC25A48	ENSMMUG00000001951	-0.334738	2.44575	0.108443	1.09597	-0.66796	-0.702533	-0.63962	-0.515033	1.57613	0.107748	-0.419982	-0.678606	-0.702533	-0.673042	1	Neuro system
IL9	ENSMMUG00000001950	-0.4888	2.95617	1.05226	0.888959	-0.530008	-0.530008	-0.530008	-0.406298	-0.210382	-0.159894	-0.45197	-0.530008	-0.530008	-0.530008	1	Neuro system
HNRNPA0	ENSMMUG00000011929	-0.517476	-0.460582	1.43642	1.26121	-0.518682	-0.819051	-0.991473	2.04455	0.378092	0.685791	-1.03845	-0.21815	-0.265917	-0.976279	1	Neuro system
-	ENSMMUG00000056877	-0.599024	2.32431	0.659538	1.87174	-0.421087	-0.768521	-0.476772	0.598226	-0.451661	-0.301056	-0.725	-0.288329	-0.83827	-0.584087	1	Neuro system
SIL1	ENSMMUG00000001939	-1.28252	0.491358	0.821878	1.80967	0.179417	-1.04248	-1.24524	1.69142	-0.0783358	0.544633	-0.143933	-0.253533	-0.489676	-1.00266	1	Neuro system
-	ENSMMUG00000064016	-0.468749	-0.111363	2.07014	2.59368	-0.468749	-0.468749	-0.298537	-0.468749	-0.468749	-0.468749	-0.468749	-0.274544	-0.468749	-0.229384	1	Neuro system
PSD2	ENSMMUG00000014636	0.0990275	1.00822	1.76112	2.45424	-0.540196	-0.548938	-0.55727	-0.414902	-0.541314	-0.547829	-0.54503	-0.530928	-0.556667	-0.539524	1	Neuro system
Metazoa_SRP	ENSMMUG00000064509	2.64853	0.0639999	0.601514	0.727021	-0.864867	-0.864867	0.0199157	-0.864867	0.270625	0.71296	-0.864867	0.144638	-0.864867	-0.864867	1	Neuro system
PURA	ENSMMUG00000010305	1.01635	0.406904	1.59752	2.2636	-0.394803	-0.822506	-0.865888	-0.275974	-0.764394	-0.349736	-0.911068	0.296637	-0.346734	-0.849903	1	Neuro system
PCDHB4	ENSMMUG00000019523	-0.163363	0.519209	1.40764	2.30639	-0.347997	-0.71524	-0.711512	0.74742	0.122678	0.406668	-1.05466	-0.686756	-0.5508	-1.27967	1	Neuro system
Metazoa_SRP	ENSMMUG00000062970	-0.957399	0.829396	1.29922	2.1048	0.0527455	-0.957399	0.404196	-0.957399	-0.520546	0.863693	0.322505	-0.569016	-0.957399	-0.957399	1	Neuro system
RELL2	ENSMMUG00000012591	0.415688	0.63318	2.18018	1.83029	-0.765589	-0.747474	-0.772752	-0.345718	-0.530796	0.666588	-0.768257	-0.381514	-0.719912	-0.693911	1	Neuro system
KCTD16	ENSMMUG00000029791	1.81069	0.425344	-0.111774	2.59931	-0.481678	-0.557406	-0.526853	-0.663109	0.185229	-0.575194	-0.424807	-0.640228	-0.608494	-0.431033	1	Neuro system
-	ENSMMUG00000059831	0.0937091	-0.147219	0.0880443	3.37002	-0.493287	-0.435793	-0.411098	-0.432283	0.230949	-0.299342	-0.400499	-0.204945	-0.404489	-0.553772	1	Neuro system
Metazoa_SRP	ENSMMUG00000056474	-0.382377	-0.382377	-0.382377	2.89349	-0.382377	-0.382377	-0.382377	-0.382377	-0.382377	-0.382377	-0.382377	1.69503	-0.382377	-0.382377	1	Neuro system
PPP2R2B	ENSMMUG00000020465	0.280316	2.55049	1.7098	0.739171	-0.590068	-0.630424	-0.648247	-0.521796	-0.318994	-0.337449	-0.637866	-0.379217	-0.567564	-0.648149	1	Neuro system
Metazoa_SRP	ENSMMUG00000061811	-0.509443	3.02686	0.048825	1.30871	-0.176242	-0.509443	-0.509443	-0.00749087	-0.509443	-0.509443	-0.509443	-0.125113	-0.509443	-0.509443	1	Neuro system
SH3TC2	ENSMMUG00000019820	0.581155	2.98797	-0.0104093	0.928299	-0.291311	-0.481338	-0.621415	-0.509672	-0.604518	-0.415192	-0.655022	-0.620299	-0.65245	0.364203	1	Neuro system
mml-mir-584	ENSMMUG00000027279	-0.530262	1.38136	0.978659	2.74587	-0.230063	-0.530262	-0.530262	-0.530262	-0.530262	-0.530262	-0.530262	-0.530262	-0.530262	-0.10348	1	Neuro system
CAMK2A	ENSMMUG00000011563	3.28069	-0.297817	-0.248484	-0.191133	-0.273302	-0.400206	0.551178	-0.379861	-0.48245	0.408279	-0.492694	-0.473902	-0.495061	-0.505238	1	Neuro system
Metazoa_SRP	ENSMMUG00000055115	0.776149	-0.273454	-0.435555	0.935171	-0.317906	-1.04294	-0.309974	2.5068	-0.102283	0.590926	-0.870692	0.629634	-1.04294	-1.04294	1	Neuro system
Metazoa_SRP	ENSMMUG00000059726	1.51385	-0.412098	-0.118042	2.95555	-0.419972	-0.548402	-0.158897	-0.161455	-0.215153	-0.548402	-0.548402	-0.400265	-0.389911	-0.548402	1	Neuro system
GLRA1	ENSMMUG00000014704	-0.739543	1.46642	-0.256939	2.85938	-0.4904	-0.345992	-0.123415	-0.475302	-0.156533	0.430891	-0.425216	-0.447905	-0.528106	-0.767335	1	Neuro system
-	ENSMMUG00000061338	-0.230076	-0.211712	1.22744	3.1155	-0.443313	-0.425248	-0.549361	-0.389605	-0.136602	-0.358177	-0.448585	-0.1824	-0.418491	-0.549361	1	Neuro system
NMUR2	ENSMMUG00000013880	-0.645548	2.01441	-0.838226	0.907787	-0.0702707	-0.38884	0.520399	-0.838226	-0.58914	-0.838226	-0.108448	-0.838226	2.00489	-0.292339	1	Neuro system
Metazoa_SRP	ENSMMUG00000057765	-0.301676	-0.301676	-0.301676	3.44641	-0.301676	-0.301676	-0.301676	-0.301676	-0.301676	-0.301676	-0.301676	0.173698	-0.301676	-0.301676	1	Neuro system
SAP30L	ENSMMUG00000056369	-0.335932	-0.513142	-0.449071	2.91307	-0.123755	-0.577811	-0.931612	-0.220525	-0.305246	0.253824	-0.608168	1.41664	-0.289462	-0.22881	1	Neuro system
-	ENSMMUG00000060123	-0.98255	-0.575714	1.43064	2.46422	-0.469315	-0.0736915	0.653635	-0.170694	0.342952	-0.615225	-1.13785	-0.345304	-0.914818	0.393708	1	Neuro system
NIPAL4	ENSMMUG00000021548	-0.465377	1.54772	-0.0174958	2.93609	-0.502249	-0.492404	-0.45763	-0.343671	-0.490539	-0.337505	-0.509591	-0.120001	-0.237752	-0.509591	1	Neuro system
PWWP2A	ENSMMUG00000011472	-0.716275	-0.311247	1.99632	2.06352	-0.425551	-0.738337	-0.732435	0.277367	0.0465184	0.821918	-1.15793	-0.310849	0.0185986	-0.831612	1	Neuro system
mml-mir-146a	ENSMMUG00000032833	3.27007	-0.392261	-0.392261	-0.392261	0.337585	-0.392261	-0.392261	0.707217	-0.392261	-0.392261	-0.392261	-0.392261	-0.392261	-0.392261	1	Neuro system
-	ENSMMUG00000060955	0.328148	-0.342271	1.41953	2.68465	-0.45563	-0.379923	-0.721987	-0.469715	0.316632	-0.644432	-0.714457	-0.625057	0.496525	-0.892016	1	Neuro system
TENM2	ENSMMUG00000009116	1.78864	2.27992	0.709215	0.544795	-0.0939292	0.0720559	-0.802333	-0.811031	-0.267202	-0.451091	-0.686778	-0.726151	-0.815627	-0.740488	1	Neuro system
Metazoa_SRP	ENSMMUG00000049370	-0.749519	0.488828	-0.749519	1.37276	-0.749519	-0.749519	-0.749519	2.18005	0.259692	-0.749519	1.09849	0.596333	-0.749519	-0.749519	1	Neuro system
mml-mir-218-2	ENSMMUG00000026928	-0.32873	-0.454594	1.85664	2.30857	-0.59582	-0.440085	-0.461297	1.20832	-0.59582	-0.59582	-0.59582	-0.442334	-0.267392	-0.59582	1	Neuro system
Metazoa_SRP	ENSMMUG00000062873	-0.810866	0.179211	1.1429	0.885923	0.821676	-0.810866	-0.810866	2.35115	-0.810866	0.0300352	-0.810866	0.265162	-0.810866	-0.810866	1	Neuro system
SNORA74	ENSMMUG00000032878	0.0605908	-0.143291	-0.318576	0.67353	-0.420083	-0.690715	-0.74188	-0.35933	-0.382135	0.207335	-0.0129618	-0.686395	-0.39141	3.20532	1	Neuro system
-	ENSMMUG00000054693	-0.869441	-0.466862	0.083872	2.58025	0.268526	0.90631	-0.869441	-0.0122944	0.85302	-0.527519	-0.869441	0.661906	-0.869441	-0.869441	1	Neuro system
-	ENSMMUG00000060788	1.44963	1.01199	0.106659	1.25115	-0.665941	-0.665941	-0.665941	-0.665941	-0.665941	-0.665941	-0.665941	-0.589957	2.09806	-0.665941	1	Neuro system
CPLX2	ENSMMUG00000052920	1.87297	1.21119	1.9363	0.886621	-0.594218	-0.586492	-0.593427	-0.59367	-0.594838	-0.593999	-0.594838	-0.581785	-0.580298	-0.593515	1	Neuro system
ARL10	ENSMMUG00000019715	-0.0445605	0.77635	0.243234	2.80734	-0.32746	-0.647931	-0.566553	0.85872	-0.388685	0.255971	-1.14988	-0.220068	-0.861161	-0.735319	1	Neuro system
CLTB	ENSMMUG00000009058	0.22809	0.727033	1.64728	0.976296	0.978297	-0.496209	0.0283892	0.277382	-1.3279	-0.801327	-1.36115	1.09413	-0.791063	-1.17924	1	Neuro system
Metazoa_SRP	ENSMMUG00000059140	-0.231261	-0.666763	-0.529562	2.7531	-0.457063	-0.119504	-0.678015	0.105752	0.545313	1.51258	-0.691565	-0.64618	-0.62817	-0.268667	1	Neuro system
-	ENSMMUG00000054880	0.616209	0.21902	2.28518	2.13068	-0.551591	-0.509247	-0.568454	-0.466839	-0.568454	-0.568454	-0.552429	-0.568454	-0.568454	-0.328716	1	Neuro system
Metazoa_SRP	ENSMMUG00000029878	-0.0870272	-0.227678	0.453305	2.22252	-0.421661	-0.466846	-0.461692	-0.204973	-0.701424	1.93724	-0.951048	0.668598	-0.89739	-0.861918	1	Neuro system
PRR7	ENSMMUG00000064063	2.02168	0.875347	0.431475	2.15524	-0.614758	-0.644256	-0.645358	-0.318817	-0.689435	-0.143159	-0.670424	-0.645498	-0.6655	-0.446534	1	Neuro system
DBN1	ENSMMUG00000022891	0.803614	1.32471	0.845539	2.33326	-0.0802383	-0.693384	-0.474158	0.025934	-0.824698	-0.0198672	-1.21689	-0.492011	-0.491165	-1.04064	1	Neuro system
-	ENSMMUG00000056607	0.129946	0.604402	0.167799	3.28995	-0.446882	-0.43257	-0.446882	-0.410037	-0.446882	-0.380742	-0.446882	-0.404565	-0.416699	-0.359954	1	Neuro system
-	ENSMMUG00000057463	-0.264484	0.600337	0.275731	3.30579	-0.4347	-0.360263	-0.391834	-0.24307	-0.4347	-0.396479	-0.4347	-0.4347	-0.382373	-0.404559	1	Neuro system
Metazoa_SRP	ENSMMUG00000062940	3.38189	0.227943	0.0988426	0.140245	-0.384892	-0.384892	-0.384892	-0.384892	-0.384892	-0.384892	-0.384892	-0.384892	-0.384892	-0.384892	1	Neuro system
N4BP3	ENSMMUG00000017607	-0.0530732	0.197196	0.0538605	2.21267	0.0318102	-0.49667	-0.646613	2.24222	-0.30185	-0.389232	-0.883967	-0.477022	-0.692103	-0.797225	1	Neuro system
COL23A1	ENSMMUG00000004000	-0.497505	1.35249	0.727877	2.19169	-0.71688	-0.917084	-0.585934	0.389134	-1.04235	-0.0711231	-1.24317	0.863647	0.132194	-0.582987	1	Neuro system
Metazoa_SRP	ENSMMUG00000050364	-0.541796	0.737677	1.47808	2.74734	-0.240406	-0.541796	-0.541796	-0.541796	-0.541796	-0.541796	-0.541796	0.153478	-0.541796	-0.541796	1	Neuro system
-	ENSMMUG00000063208	-0.530132	0.0625037	1.45245	2.3098	-0.708564	-0.648422	-0.526238	-0.263817	-0.0309833	0.370509	-0.97775	1.17819	-0.625924	-1.06163	1	Neuro system
-	ENSMMUG00000058524	-0.95205	0.572583	1.2876	1.53297	-0.199122	0.131882	-0.326708	-0.902874	-0.000197256	1.67654	-0.177673	0.0094239	-0.868524	-1.78385	1	Neuro system
Metazoa_SRP	ENSMMUG00000059244	3.10727	-0.106031	0.386284	1.07597	-0.465906	-0.465906	-0.465906	-0.465906	-0.465906	-0.465906	-0.465906	-0.270347	-0.465906	-0.465906	1	Neuro system
SCGB3A1	ENSMMUG00000018692	0.798937	0.0662918	0.509529	2.38025	1.31616	0.375152	-0.952267	0.099202	-0.952267	-0.952267	-0.620628	-0.750997	-0.73693	-0.580159	1	Neuro system
-	ENSMMUG00000061151	-0.716423	0.190369	2.18316	2.1664	-0.403404	-0.599226	-0.39916	0.647048	-0.0751429	-0.414753	-0.791283	-0.533169	-0.717642	-0.536775	1	Neuro system
-	ENSMMUG00000054414	0.590554	-0.253025	-0.223946	2.83468	-0.372112	-0.807415	-0.631389	-0.282805	1.33868	0.134304	-0.559217	-0.706996	-0.377662	-0.683644	1	Neuro system
TRIM41	ENSMMUG00000003603	1.69669	0.446155	0.250005	2.39216	-0.541422	-0.923724	-0.761338	0.117971	-0.72619	0.435297	-0.874831	-0.224459	-0.780046	-0.506264	1	Neuro system
-	ENSMMUG00000058929	-0.309008	2.17338	-0.0616961	2.20046	-0.678419	-0.678419	-0.343513	-0.678419	-0.439639	0.781488	-0.678419	-0.381218	-0.542145	-0.364439	1	Neuro system
-	ENSMMUG00000057888	0.926794	0.367414	0.638985	2.34303	-0.644914	-0.972825	-0.947366	-0.497443	-0.3943	0.171159	-0.9295	-0.590495	-0.750929	1.28039	1	Neuro system
-	ENSMMUG00000057577	0.651718	-0.46923	0.34451	3.2324	-0.413404	-0.406823	-0.237518	-0.017185	-0.110143	-0.563712	-0.394503	-0.410869	-0.518198	-0.687039	1	Neuro system
-	ENSMMUG00000055966	0.360552	2.21791	-0.302049	1.0409	-0.772561	-0.763881	-0.928228	1.21108	0.710142	-0.48284	0.366941	-0.795234	-1.04994	-0.812786	1	Neuro system
Metazoa_SRP	ENSMMUG00000062482	-0.377351	2.98485	-0.377351	1.54336	-0.377351	-0.377351	-0.377351	-0.377351	-0.377351	-0.377351	-0.377351	-0.377351	-0.377351	-0.377351	1	Neuro system
GPR31	ENSMMUG00000060558	-0.636077	2.04048	-0.636077	1.65746	-0.425916	-0.636077	-0.636077	0.313716	-0.636077	1.6372	-0.636077	-0.393668	-0.376725	-0.636077	1	Neuro system
RPS6KA2	ENSMMUG00000005670	-0.650167	1.66086	-0.430329	1.136	-0.0928999	-0.742831	-0.255198	1.74345	-0.685565	-0.570286	-1.16518	0.764176	0.562577	-1.27461	1	Neuro system
PRR18	ENSMMUG00000011700	-0.160961	0.623954	-0.0153759	3.33916	-0.385624	-0.38637	-0.386514	-0.368462	-0.369927	-0.364732	-0.385714	-0.382238	-0.377438	-0.379754	1	Neuro system
TBXT	ENSMMUG00000017047	-0.45594	0.906136	0.52146	3.15165	-0.45594	-0.45594	-0.45594	-0.192299	-0.45594	-0.350772	-0.45594	-0.388653	-0.45594	-0.45594	1	Neuro system
-	ENSMMUG00000062172	-0.538178	2.34336	1.54679	1.51948	-0.42505	-0.140981	-0.538178	-0.538178	-0.538178	-0.538178	-0.538178	-0.538178	-0.538178	-0.538178	1	Neuro system
Metazoa_SRP	ENSMMUG00000063971	-0.615315	0.415143	-0.157788	3.30299	0.0218578	0.165907	-0.247233	-0.0211093	-0.41849	-0.396516	-0.413483	-0.405331	-0.615315	-0.615315	1	Neuro system
-	ENSMMUG00000054834	0.159037	0.19116	1.00249	2.74678	0.663345	-0.4613	-0.860507	-0.0954062	-0.56328	0.342451	-0.496587	-0.847725	-0.914288	-0.866173	1	Neuro system
Metazoa_SRP	ENSMMUG00000062655	-0.646002	0.157538	-0.646002	2.1082	2.00392	-0.202956	-0.646002	1.06485	-0.646002	0.0364674	-0.646002	-0.646002	-0.646002	-0.646002	1	Neuro system
-	ENSMMUG00000057516	-0.810009	-0.804093	0.976335	2.81605	-0.70787	-0.552979	-0.601999	0.16807	0.550032	-0.173684	0.0612275	0.505952	-0.659884	-0.767154	1	Neuro system
-	ENSMMUG00000064227	-0.704583	-0.160097	1.01455	2.79468	-0.704583	-0.554477	0.592028	-0.511368	-0.538181	-0.0109113	-0.582701	0.774803	-0.704583	-0.704583	1	Neuro system
OSTM1	ENSMMUG00000022247	-0.899894	0.0758151	-0.00191667	2.38404	-0.679374	-0.897126	-0.958589	1.07225	0.927526	0.826607	-0.560834	0.177434	-0.415392	-1.05054	1	Neuro system
NR2E1	ENSMMUG00000023767	3.44121	0.088255	-0.372688	-0.0764522	-0.318399	-0.372688	-0.153155	-0.372688	-0.231818	-0.274815	-0.372688	-0.372688	-0.238695	-0.372688	1	Neuro system
Metazoa_SRP	ENSMMUG00000056155	-0.456883	-0.456883	-0.456883	3.31708	-0.111067	0.150203	-0.456883	0.0640726	-0.456883	0.478275	-0.456883	-0.456883	-0.243503	-0.456883	1	Neuro system
Metazoa_SRP	ENSMMUG00000060696	1.28148	0.453171	1.99776	1.90409	-0.675899	-0.675899	-0.496652	-0.141688	-0.675899	-0.675899	-0.675899	-0.26687	-0.675899	-0.675899	1	Neuro system
FYN	ENSMMUG00000017017	-0.337844	0.595624	0.733855	1.79898	-0.365232	-0.622628	-0.818308	0.872511	-0.837922	1.95326	-0.91984	-0.53324	-0.794657	-0.724559	1	Neuro system
-	ENSMMUG00000061978	0.288411	1.19931	0.80029	2.6542	-0.15045	-0.245213	-0.802297	-0.565992	0.383387	-0.773604	-0.83893	-0.546358	-0.615343	-0.787415	1	Neuro system
MARCKS	ENSMMUG00000008934	0.328286	0.390372	0.294066	3.22122	-0.412809	-0.617048	-0.659484	-0.0323791	-0.629779	-0.191047	-0.581441	-0.491535	-0.101928	-0.516497	1	Neuro system
HS3ST5	ENSMMUG00000050295	-0.245754	2.61857	-0.437289	0.740607	-0.0390041	0.378581	1.0794	0.581171	-0.875005	-0.875005	-0.7757	-0.6038	-0.746045	-0.800723	1	Neuro system
-	ENSMMUG00000057271	-1.09732	-0.765767	0.996331	1.74374	-0.472522	-1.09732	-0.465687	1.25574	-0.692014	0.0290661	-0.206715	1.42502	0.444759	-1.09732	1	Neuro system
-	ENSMMUG00000052345	0.022397	-0.213895	1.00703	3.20969	-0.422736	-0.417014	-0.327281	-0.425965	-0.32558	-0.40788	-0.424406	-0.386584	-0.431455	-0.456329	1	Neuro system
-	ENSMMUG00000062783	2.72131	-0.208735	0.528553	1.71742	-0.474278	-0.529174	-0.473678	-0.405127	-0.279898	-0.479691	-0.529174	-0.529174	-0.529174	-0.529174	1	Neuro system
-	ENSMMUG00000051010	0.210046	0.516835	-0.538183	3.07799	0.704406	0.334371	-0.538183	-0.538183	-0.538183	-0.538183	-0.538183	-0.538183	-0.538183	-0.538183	1	Neuro system
Metazoa_SRP	ENSMMUG00000062287	1.51477	-0.285996	1.55266	1.9403	-0.823568	-0.705008	-0.721156	-0.365741	-0.297845	0.820103	-0.823568	-0.589872	-0.823568	-0.39151	1	Neuro system
-	ENSMMUG00000057630	0.204318	-0.30646	0.0762976	3.3221	-0.20562	-0.0783202	-0.447252	-0.367027	0.329344	-0.30675	-0.576795	-0.509212	-0.547935	-0.58669	1	Neuro system
Metazoa_SRP	ENSMMUG00000055646	-0.472767	-0.331703	1.89763	2.55718	-0.233877	-0.573082	0.377301	-0.532791	-0.557851	0.151067	-0.713377	-0.436838	-0.41751	-0.713377	1	Neuro system
-	ENSMMUG00000010611	0.639661	0.552487	2.20939	2.08546	-0.590221	-0.60196	-0.593248	-0.51512	-0.572731	-0.386808	-0.60747	-0.483588	-0.540923	-0.594925	1	Neuro system
-	ENSMMUG00000050037	-0.493277	-0.801676	1.25544	1.92077	-0.744276	-0.853425	-0.906204	0.878916	0.369955	0.99748	0.646915	-0.0952083	-0.934477	-1.24093	1	Neuro system
Metazoa_SRP	ENSMMUG00000059506	-0.252234	-0.384622	-0.411292	3.27807	0.00300421	-0.528298	-0.471693	0.0610844	-0.228872	-0.326507	-0.169194	0.654137	-0.566541	-0.657046	1	Neuro system
Metazoa_SRP	ENSMMUG00000060778	-0.380903	-0.380903	1.64796	2.92287	-0.380903	-0.380903	-0.380903	-0.380903	-0.380903	-0.380903	-0.380903	-0.380903	-0.380903	-0.380903	1	Neuro system
5S_rRNA	ENSMMUG00000027839	-0.451249	0.542814	1.35055	2.95599	-0.381869	-0.451249	-0.451249	-0.451249	-0.406242	-0.451249	-0.451249	-0.451249	-0.451249	-0.451249	1	Neuro system
-	ENSMMUG00000058516	-0.216826	0.311011	2.23195	2.33073	-0.599498	-0.439983	-0.590218	-0.24561	-0.338452	-0.562868	-0.603615	-0.443482	-0.150809	-0.682325	1	Neuro system
-	ENSMMUG00000061523	-1.25468	0.9515	-0.383969	1.58103	-1.25468	-1.25468	0.321425	1.87683	0.0937898	-0.317795	0.226864	0.543598	-0.613359	-0.515867	1	Neuro system
-	ENSMMUG00000061117	0.454749	-0.421993	0.15905	3.23209	-0.437552	0.199678	-0.434775	-0.500176	0.131784	-0.00507211	-0.450167	-0.544968	-0.691324	-0.691324	1	Neuro system
-	ENSMMUG00000058420	-0.547823	-0.439334	0.274882	2.57909	-0.276887	-0.632643	-0.131244	-0.0880522	0.770806	1.52972	-0.756685	-0.682816	-0.684868	-0.914152	1	Neuro system
-	ENSMMUG00000064712	0.760058	-0.318621	-0.0444835	3.2587	-0.471808	-0.353278	-0.375852	-0.447902	0.154648	-0.519012	-0.474155	-0.246778	-0.402507	-0.519012	1	Neuro system
-	ENSMMUG00000064795	-0.390597	1.46645	-0.0781819	2.89366	-0.552171	-0.565131	-0.696602	-0.33397	-0.134446	-0.43622	-0.650852	0.1919	-0.0628669	-0.650973	1	Neuro system
SAMD5	ENSMMUG00000017086	-0.493039	2.50379	-0.430908	1.31748	-0.641232	-0.786238	-0.800584	-0.0619511	-0.228067	-0.513304	-0.684099	0.528456	1.09028	-0.800584	1	Neuro system
-	ENSMMUG00000064652	0.398068	-0.516552	-0.315154	3.30973	-0.316495	-0.332679	-0.365065	-0.264391	-0.175068	-0.295751	-0.473924	0.425516	-0.507778	-0.570459	1	Neuro system
SASH1	ENSMMUG00000004893	-0.738901	1.68357	-0.115134	1.2787	-0.0976168	-0.534344	-0.787812	1.64138	0.372161	0.837816	-1.08757	-0.509235	-0.662271	-1.28074	1	Neuro system
UST	ENSMMUG00000014360	-0.786611	0.716889	0.919215	1.60036	-0.545829	-0.618936	-0.0285587	-0.609888	0.147183	2.22606	-1.05608	-0.7924	-0.562246	-0.609155	1	Neuro system
Metazoa_SRP	ENSMMUG00000059871	-0.371784	-0.462431	0.517952	3.21936	-0.372883	-0.440175	-0.266353	-0.525319	0.38026	-0.127073	-0.582084	0.262723	-0.55312	-0.679073	1	Neuro system
LRP11	ENSMMUG00000029463	0.115335	1.53713	1.87354	1.70146	-0.480156	-1.06363	-1.00904	0.266267	-0.270926	-0.35114	-0.904125	-0.349021	-0.353846	-0.711857	1	Neuro system
Metazoa_SRP	ENSMMUG00000064836	1.14701	0.689749	1.70427	1.44039	-1.06342	-1.06342	-1.06342	-0.23392	0.365353	-0.567079	-0.801789	0.841947	-0.723661	-0.672013	1	Neuro system
Metazoa_SRP	ENSMMUG00000062369	-0.434172	-0.629426	0.189082	1.02882	0.183632	-0.606918	-0.22245	2.88319	-0.84851	0.26794	-0.456177	0.34201	-0.84851	-0.84851	1	Neuro system
ZDHHC14	ENSMMUG00000015872	-0.778246	1.29657	1.62836	1.48669	-0.563109	-1.02814	-0.662021	1.06099	0.00930472	0.6442	-0.802977	-0.61513	-0.651481	-1.025	1	Neuro system
U2	ENSMMUG00000060257	-0.581024	-0.581024	1.45097	2.72785	-0.581024	-0.581024	-0.581024	0.332485	0.205715	0.512192	-0.581024	-0.581024	-0.581024	-0.581024	1	Neuro system
Metazoa_SRP	ENSMMUG00000050646	-0.588257	-0.303023	-0.223825	3.17846	-0.422399	-0.630298	-0.248032	0.460576	-0.381722	-0.0200584	-0.52669	0.521611	0.107224	-0.923569	1	Neuro system
SYNJ2	ENSMMUG00000007153	-0.319051	2.10791	0.0462902	1.66452	0.885507	-0.462676	-0.756782	-0.403984	-0.166324	-1.03794	-0.748977	0.791577	-0.366793	-1.23327	1	Neuro system
Metazoa_SRP	ENSMMUG00000056780	-0.78881	0.709597	1.6395	2.44677	0.616766	-0.517627	-0.350677	-0.408575	-0.757034	-0.117448	-0.897349	-0.585483	-0.630418	-0.359209	1	Neuro system
Metazoa_SRP	ENSMMUG00000051509	-0.859773	-0.533517	1.71549	2.49504	-0.552365	-0.859773	-0.549001	0.0664191	-0.460942	-0.305576	0.600858	0.203963	-0.10105	-0.859773	1	Neuro system
Metazoa_SRP	ENSMMUG00000063481	-0.502208	-0.502208	-0.502208	3.20206	-0.502208	0.292291	0.184078	-0.502208	0.378542	-0.502208	-0.502208	-0.502208	-0.502208	0.4629	1	Neuro system
Metazoa_SRP	ENSMMUG00000057821	-0.725945	-0.307116	-0.725945	2.86299	0.0633221	-0.725945	0.869859	-0.725945	0.298048	-0.725945	-0.35093	0.184432	0.735065	-0.725945	1	Neuro system
U6	ENSMMUG00000032837	-0.378423	1.57379	-0.378423	2.96728	-0.378423	-0.378423	-0.378423	-0.378423	-0.378423	-0.378423	-0.378423	-0.378423	-0.378423	-0.378423	1	Neuro system
-	ENSMMUG00000055978	-0.375024	-0.361992	0.306235	3.34055	-0.375834	-0.231686	-0.28207	-0.193473	0.394291	-0.520198	-0.344149	-0.393273	-0.490157	-0.473215	1	Neuro system
Metazoa_SRP	ENSMMUG00000055442	-0.480784	0.266013	1.28764	3.03882	-0.480784	-0.480784	-0.480784	-0.215778	-0.252554	-0.480784	-0.480784	-0.277877	-0.480784	-0.480784	1	Neuro system
POU3F2	ENSMMUG00000001658	-0.0116015	1.72301	0.837464	2.58683	-0.512313	-0.505272	-0.517565	-0.517565	-0.517565	-0.517565	-0.517565	-0.517565	-0.517565	-0.495167	1	Neuro system
SPACA1	ENSMMUG00000004947	-0.499401	0.601938	1.23926	2.96096	-0.499401	-0.499401	-0.499401	-0.499401	-0.499401	-0.499401	-0.499401	-0.299909	-0.499401	-0.0076403	1	Neuro system
Metazoa_SRP	ENSMMUG00000057795	-0.558093	-0.558093	-0.558093	2.36752	1.05039	-0.558093	-0.558093	-0.558093	-0.558093	-0.558093	-0.558093	-0.558093	0.434392	1.72862	1	Neuro system
-	ENSMMUG00000061590	0.719323	-0.482922	-0.137584	2.92337	-0.0396867	-0.642997	-0.490519	1.17472	-0.642997	-0.371084	-0.642997	-0.295054	-0.642997	-0.428571	1	Neuro system
-	ENSMMUG00000059905	0.303773	-1.02715	0.82447	2.18901	0.0779854	-0.768474	0.0900762	-0.694185	1.55369	0.566725	-0.817113	-0.517266	-0.75439	-1.02715	1	Neuro system
TPBG	ENSMMUG00000063437	-0.521636	0.567706	-0.609805	2.25141	0.931878	-0.309435	-0.477075	-0.451679	1.84378	-0.526127	-0.729519	-0.806049	-0.71229	-0.451156	1	Neuro system
-	ENSMMUG00000056066	-0.325279	-0.310106	0.291753	3.23583	-0.194791	-0.512176	0.00882753	-0.589086	0.604549	0.00327811	-0.526637	-0.589086	-0.507989	-0.589086	1	Neuro system
Metazoa_SRP	ENSMMUG00000062483	-0.242202	-0.629205	1.30907	2.87775	-0.436396	-0.403552	-0.239367	-0.629205	0.621547	0.0659899	-0.629205	-0.40681	-0.629205	-0.629205	1	Neuro system
-	ENSMMUG00000065130	-1.34318	1.90892	1.05998	0.90991	0.8083	0.564375	0.172742	-0.852103	-0.412738	0.184792	-1.0334	0.23603	-0.86044	-1.34318	1	Neuro system
Metazoa_SRP	ENSMMUG00000056399	-1.2409	0.307389	-0.833524	1.85479	0.704228	0.466452	0.233907	1.68934	-0.294548	0.0741067	-1.2409	0.16135	-0.640796	-1.2409	1	Neuro system
-	ENSMMUG00000064069	0.408882	-1.0868	0.0332748	2.29564	0.3083	-0.560093	0.0412693	-0.109957	1.05669	1.07483	-1.02868	-0.191893	-0.921796	-1.31967	1	Neuro system
-	ENSMMUG00000061178	0.135191	-0.33134	-0.0340032	3.30499	-0.390884	-0.480296	-0.539964	-0.382536	0.481965	0.0887918	-0.528472	-0.395552	-0.36383	-0.564062	1	Neuro system
HTR1B	ENSMMUG00000015717	0.555117	2.04161	-0.221614	-0.173991	-0.695003	-0.778027	-0.778027	1.22311	-0.13174	-0.778027	-0.778027	-0.490737	1.78338	-0.778027	1	Neuro system
Metazoa_SRP	ENSMMUG00000049531	-0.250445	-0.162136	-0.335018	3.30251	-0.0381756	-0.420785	-0.5767	0.444902	-0.3289	0.258403	-0.629997	-0.212916	-0.608772	-0.441974	1	Neuro system
Metazoa_SRP	ENSMMUG00000053484	-0.624977	-0.624977	1.93183	2.15066	-0.624977	-0.624977	0.917742	0.524464	-0.624977	-0.624977	0.100103	-0.624977	-0.624977	-0.624977	1	Neuro system
Metazoa_SRP	ENSMMUG00000055617	0.883095	0.403585	-0.346614	2.7174	-0.595121	-0.101877	-0.0332034	-0.68591	-0.485708	-0.963025	-0.963025	0.734402	0.399025	-0.963025	1	Neuro system
Metazoa_SRP	ENSMMUG00000037786	-0.80452	-0.199798	-0.370583	3.15252	-0.0275371	-0.198295	-0.385595	0.209903	-0.132483	0.876377	-0.656848	-0.266795	-0.61275	-0.583598	1	Neuro system
-	ENSMMUG00000065155	0.013394	-0.563327	-0.0412731	3.35846	-0.239699	-0.349759	-0.402978	0.139667	0.0175239	0.0118681	-0.423228	-0.451674	-0.328485	-0.740494	1	Neuro system
COL9A1	ENSMMUG00000005577	-0.45098	0.716276	-0.135447	1.90722	2.04957	-0.0190531	-0.759886	-0.71432	-0.713819	-0.719068	-0.738948	-0.692383	-0.655226	0.926065	1	Neuro system
Metazoa_SRP	ENSMMUG00000064644	-0.572428	-0.254375	1.73724	2.80705	-0.212813	-0.432137	-0.572428	-0.030685	-0.183625	-0.24827	-0.458515	-0.434162	-0.572428	-0.572428	1	Neuro system
-	ENSMMUG00000058705	-0.482224	-0.482224	1.5641	2.84998	-0.482224	-0.482224	-0.482224	-0.482224	0.310063	-0.482224	0.0980917	-0.482224	-0.482224	-0.482224	1	Neuro system
PAQR8	ENSMMUG00000052626	0.329193	1.61305	1.60058	1.5752	-0.740169	-0.775258	-0.855956	-0.655129	-0.479457	-0.54382	-0.870614	-0.237608	0.913022	-0.873036	1	Neuro system
-	ENSMMUG00000054154	-0.137761	0.0530618	1.46876	2.95816	-0.448581	-0.482553	-0.498979	-0.525537	-0.0683616	-0.417376	-0.456265	-0.365429	-0.475986	-0.603159	1	Neuro system
LRRC73	ENSMMUG00000051917	1.66486	0.374721	1.76032	1.92173	-0.529152	-0.624272	-0.611491	-0.478728	-0.535184	-0.548859	-0.598267	-0.634241	-0.602255	-0.559178	1	Neuro system
TJAP1	ENSMMUG00000023319	-0.71515	1.88425	0.614263	2.2625	-0.515795	-0.679874	-0.464443	-0.180684	-0.640086	-0.0117668	-0.691611	0.647141	-0.653782	-0.854954	1	Neuro system
Metazoa_SRP	ENSMMUG00000059826	0.114456	-0.442647	2.36629	2.11288	-0.0315075	-0.578715	-0.745942	0.115068	-0.189799	-0.230748	-0.745942	-0.251505	-0.745942	-0.745942	1	Neuro system
PRPH2	ENSMMUG00000057019	-0.194388	0.459138	1.66573	1.34398	-0.780493	-0.780493	1.8763	-0.780493	-0.780493	-0.254066	-0.780493	0.566754	-0.780493	-0.780493	1	Neuro system
Metazoa_SRP	ENSMMUG00000058781	-0.307054	-0.273837	0.400985	2.60443	-0.30912	0.237907	-0.88459	1.42719	-0.88459	0.49869	-0.520015	-0.220816	-0.88459	-0.88459	1	Neuro system
FRS3	ENSMMUG00000012417	0.487034	0.880636	2.0345	1.8504	-0.51027	-0.726506	-0.773331	0.432845	-0.225594	-0.130665	-0.865366	-0.712025	-0.941592	-0.800071	1	Neuro system
MDFI	ENSMMUG00000009449	-0.196733	0.525871	-0.0511491	3.2495	-0.528511	-0.515338	-0.552413	0.385836	-0.53338	-0.532066	-0.558852	-0.467536	-0.104845	-0.12038	1	Neuro system
TREM2	ENSMMUG00000013920	-0.539921	2.57867	0.181289	0.921326	-0.570856	-0.815877	-0.804881	1.26483	-0.686265	0.373755	-0.617882	-0.0364601	-0.335835	-0.911891	1	Neuro system
Metazoa_SRP	ENSMMUG00000051603	-0.687077	0.732899	-0.687077	1.74647	0.650869	-0.687077	-0.687077	1.32848	-0.687077	1.72498	-0.687077	-0.687077	-0.687077	-0.687077	1	Neuro system
LRFN2	ENSMMUG00000012572	2.98752	0.212182	0.392138	1.23295	-0.503385	-0.501504	-0.514428	-0.514428	-0.514428	-0.355168	-0.514428	-0.501691	-0.500801	-0.404537	1	Neuro system
DAAM2	ENSMMUG00000019072	1.35298	1.8067	-0.00468118	2.17074	-0.641021	-0.721483	-0.636107	-0.26371	-0.531523	-0.237861	-0.680965	-0.325561	-0.485842	-0.801669	1	Neuro system
KIF6	ENSMMUG00000013651	1.34488	2.73534	0.569313	0.619895	-0.235407	-0.668247	-0.748278	-0.645263	-0.526479	-0.563357	-0.520837	-0.432775	-0.326334	-0.602453	1	Neuro system
Metazoa_SRP	ENSMMUG00000053975	-0.338493	0.731817	-0.338493	3.33009	-0.338493	-0.338493	-0.338493	-0.338493	-0.338493	-0.338493	-0.338493	-0.338493	-0.338493	-0.338493	1	Neuro system
Metazoa_SRP	ENSMMUG00000048908	-1.34839	-0.817248	0.604307	1.89039	-0.1601	-0.0857279	0.0471003	0.23019	0.0555237	0.893863	-0.731113	1.62002	-0.866458	-1.33236	1	Neuro system
-	ENSMMUG00000045968	0.206706	-0.040188	1.19088	1.79978	-0.917349	-0.648732	-0.050729	1.89254	-0.0839039	-0.148559	-1.24481	-0.168131	-0.542294	-1.24521	1	Neuro system
-	ENSMMUG00000059553	1.93103	-0.394788	-0.235625	2.1584	-0.410677	-0.669833	-0.407842	1.2822	-0.669833	-0.202625	-0.669833	-0.37091	-0.669833	-0.669833	1	Neuro system
CPNE5	ENSMMUG00000005854	3.25833	0.437521	-0.173787	0.580029	-0.407725	-0.517091	-0.542788	-0.336707	-0.123565	-0.449098	-0.54396	-0.35614	-0.455008	-0.37001	1	Neuro system
LHFPL5	ENSMMUG00000063626	0.692126	1.54315	1.94013	1.47053	-0.89509	-0.974153	-0.494586	-0.37863	-0.461273	-0.118944	-0.823888	0.0289895	-0.779015	-0.749351	1	Neuro system
RING1	ENSMMUG00000003863	0.649258	0.000737996	1.44232	1.92883	-0.705757	-1.06555	-0.900795	0.974961	-0.297026	0.600034	-0.998822	0.255944	-0.723091	-1.16105	1	Neuro system
COL11A2	ENSMMUG00000003850	-0.186849	0.822205	-0.0366844	3.283	-0.378149	-0.390185	-0.343213	-0.391361	-0.400539	-0.391393	-0.400597	-0.400818	-0.403057	-0.382362	1	Neuro system
Metazoa_SRP	ENSMMUG00000057203	2.4924	-0.392843	-0.392843	2.22172	-0.392843	-0.392843	-0.392843	-0.392843	-0.392843	-0.392843	-0.392843	-0.392843	-0.392843	-0.392843	1	Neuro system
ZBTB12	ENSMMUG00000011683	0.443442	0.354407	1.84702	1.87025	-0.544001	-1.22634	-0.84673	0.166467	-0.480265	0.620277	-1.22718	-0.0408554	-1.04374	0.107252	1	Neuro system
EHMT2	ENSMMUG00000011679	0.339402	0.490662	1.66667	1.65525	-0.877162	-1.06508	-1.08177	1.08088	-0.432937	0.3165	-0.977435	0.470154	-0.506425	-1.0787	1	Neuro system
-	ENSMMUG00000064499	0.627564	-0.363641	-0.115296	2.88466	-0.7928	-0.7928	-0.384009	0.12094	-0.00586279	-0.7928	0.359995	0.839655	-0.7928	-0.7928	1	Neuro system
HSPA1L	ENSMMUG00000029822	-0.21285	-0.139971	-0.129697	2.28238	0.266168	-0.0651843	-0.447988	2.0813	-0.0858588	-0.801959	-1.12259	-0.0856123	-0.783796	-0.754348	1	Neuro system
Metazoa_SRP	ENSMMUG00000051211	-0.748931	0.941779	1.03046	2.1486	-0.748931	-0.748931	-0.748931	-0.748931	-0.0599961	1.16569	0.764915	-0.748931	-0.748931	-0.748931	1	Neuro system
NFKBIL1	ENSMMUG00000062024	-0.259468	0.00533898	0.802685	2.69306	-0.431912	-0.891093	-0.777655	0.787436	-0.374048	0.856774	-0.892851	-0.022127	-0.607528	-0.888613	1	Neuro system
-	ENSMMUG00000061993	2.81425	0.226716	0.0681495	-0.0255714	-0.817063	0.572874	-0.914846	-0.178317	-0.280527	0.847993	-0.914846	-0.914846	0.291862	-0.775831	1	Neuro system
DDR1	ENSMMUG00000018601	-0.481438	1.02554	0.447884	2.9244	-0.651559	-0.702788	-0.675548	-0.409315	-0.064389	-0.620393	-0.757763	0.122885	0.385274	-0.542796	1	Neuro system
Metazoa_SRP	ENSMMUG00000065189	-0.692209	0.725679	1.4975	2.12769	0.285618	-0.346622	-1.01837	-0.746487	-1.09724	1.11665	-0.721222	-0.23393	-0.43241	-0.464642	1	Neuro system
GNL1	ENSMMUG00000020077	1.39147	0.332422	1.6404	1.62269	-0.826032	-0.965514	-0.767046	0.912101	-0.0429223	-0.181892	-0.900442	-0.508507	-0.723646	-0.983086	1	Neuro system
Metazoa_SRP	ENSMMUG00000060410	-0.359082	-0.359082	-0.359082	3.19589	-0.359082	-0.359082	-0.359082	1.1131	-0.359082	-0.359082	-0.359082	-0.359082	-0.359082	-0.359082	1	Neuro system
ZFP57	ENSMMUG00000045668	-0.106126	2.68448	-0.0624878	1.91876	-0.449601	-0.492363	-0.492363	-0.492363	-0.492363	-0.106908	-0.492363	-0.492363	-0.492363	-0.43157	1	Neuro system
MOG	ENSMMUG00000002967	0.296695	2.73926	0.334215	1.66249	-0.504036	-0.498836	-0.5049	-0.500997	-0.5049	-0.5049	-0.504079	-0.503904	-0.5049	-0.501217	1	Neuro system
Metazoa_SRP	ENSMMUG00000049050	0.342802	0.267661	-0.246064	3.36983	-0.373681	-0.374863	-0.375038	-0.368311	-0.376092	-0.375786	-0.374726	-0.369732	-0.371543	-0.37446	1	Neuro system
NKAPL	ENSMMUG00000052539	0.604694	1.1956	1.45057	1.68008	0.71245	-0.160649	0.271425	-1.05879	-1.08269	-0.612714	-1.12237	-0.0442402	-1.08993	-0.743432	1	Neuro system
-	ENSMMUG00000041123	2.42503	-0.249653	0.570249	1.97561	-0.0925609	-0.210609	-0.629703	-0.629703	-0.629703	-0.629703	-0.629703	-0.0101386	-0.629703	-0.629703	1	Neuro system
-	ENSMMUG00000001435	2.55747	0.339291	-0.149042	1.66384	-0.691439	-0.691439	-0.691439	-0.691439	-0.691439	-0.10782	-0.691439	0.428772	0.107565	-0.691439	1	Neuro system
-	ENSMMUG00000052602	-0.444449	-0.0536516	1.54555	1.61883	-0.725085	-0.631444	-0.583101	-0.374054	2.19545	-0.543095	-0.79493	-0.150425	-0.36396	-0.695634	1	Neuro system
NRSN1	ENSMMUG00000008451	2.4112	1.60538	1.1822	0.34765	-0.492708	-0.595174	-0.546427	-0.504374	-0.524794	-0.595174	-0.572263	-0.532603	-0.587736	-0.595174	1	Neuro system
-	ENSMMUG00000058092	2.29315	0.85353	0.263649	0.136014	0.901271	-0.619948	-0.749752	1.11637	-0.96346	-0.104933	-0.918192	-0.164079	-0.915913	-1.12771	1	Neuro system
-	ENSMMUG00000052477	1.68181	2.09924	0.0411661	1.14928	-0.511945	-0.896563	-0.938056	0.550297	-0.483796	-0.838341	-0.949833	-0.21377	-0.533182	-0.15631	1	Neuro system
-	ENSMMUG00000056207	-0.0945168	-0.447793	1.65893	2.5525	-0.844187	-0.844187	-0.844187	-0.844187	0.124955	-0.170849	-0.48926	0.0174248	0.538563	-0.313204	1	Neuro system
Metazoa_SRP	ENSMMUG00000041361	-0.0928806	0.198478	-0.115265	2.72275	-0.659302	-0.493821	-0.277519	1.65352	0.151564	-0.569637	-0.712125	-0.390198	-0.591821	-0.823746	1	Neuro system
ID4	ENSMMUG00000014691	-0.232487	0.927895	0.185963	2.58984	-0.903711	-0.904509	-0.912606	1.08965	0.134916	0.102987	-0.932525	-0.405311	0.0492033	-0.7893	1	Neuro system
Metazoa_SRP	ENSMMUG00000063576	-0.365398	-0.365398	1.24775	3.13703	-0.365398	-0.365398	-0.365398	-0.365398	-0.365398	-0.365398	-0.365398	-0.365398	-0.365398	-0.365398	1	Neuro system
-	ENSMMUG00000052333	-0.949414	-0.805867	0.308207	1.73874	-0.94965	0.910814	-0.349914	2.15829	0.351182	-0.896796	-0.0144609	-0.787669	-0.446757	-0.266703	1	Neuro system
-	ENSMMUG00000048878	-0.714201	1.12477	1.63588	2.12188	-0.285936	-0.33153	-0.422771	0.938701	-0.815769	-0.743446	-0.593472	-0.671313	-0.64824	-0.594551	1	Neuro system
Metazoa_SRP	ENSMMUG00000053653	-0.75121	-0.289347	-0.508166	3.20648	0.409274	-0.581439	0.128676	-0.314156	-0.186607	0.294853	-0.337662	0.252707	-0.572196	-0.75121	1	Neuro system
Metazoa_SRP	ENSMMUG00000059381	0.308879	-0.518926	-0.518926	2.48164	-0.518926	-0.518926	-0.518926	1.96625	-0.518926	-0.518926	-0.518926	0.432488	-0.518926	-0.518926	1	Neuro system
Metazoa_SRP	ENSMMUG00000055574	-0.393012	-0.393012	2.24517	2.47097	-0.393012	-0.393012	-0.393012	-0.393012	-0.393012	-0.393012	-0.393012	-0.393012	-0.393012	-0.393012	1	Neuro system
NOL7	ENSMMUG00000008681	0.214816	-0.266358	-0.120873	3.28914	0.0458412	-0.449549	-0.490533	0.463945	-0.192977	-0.267858	-0.68627	-0.425498	-0.491851	-0.621978	1	Neuro system
-	ENSMMUG00000060827	0.383419	-0.578301	1.42866	2.90767	-0.338731	-0.297922	-0.093919	-0.2174	-0.578301	-0.578301	-0.578301	-0.30197	-0.578301	-0.578301	1	Neuro system
Metazoa_SRP	ENSMMUG00000045685	-0.632311	0.47055	1.10875	1.25777	-0.632311	-0.632311	-0.632311	2.49855	-0.632311	-0.632311	0.355181	-0.632311	-0.632311	-0.632311	1	Neuro system
-	ENSMMUG00000056859	0.624816	1.0279	0.535897	2.44484	0.0677504	-0.180863	-0.473376	-0.271659	0.65523	-0.315816	-1.17694	-0.831707	-0.798442	-1.30764	1	Neuro system
Metazoa_SRP	ENSMMUG00000053748	-0.372302	-0.0354607	0.388607	2.99944	-0.472359	-0.652838	-0.568842	1.0149	-0.640306	0.298701	-0.580808	-0.0856194	-0.524823	-0.768282	1	Neuro system
-	ENSMMUG00000057424	-0.636915	0.0888603	1.56142	2.25951	-0.504018	-0.905591	-0.770269	0.50596	0.310074	0.0596849	0.748051	-0.905591	-0.905591	-0.905591	1	Neuro system
Metazoa_SRP	ENSMMUG00000059373	-0.0904023	-0.318129	-0.442106	3.38239	0.258786	-0.442106	-0.324013	-0.266129	-0.29055	0.189679	-0.331098	-0.442106	-0.442106	-0.442106	1	Neuro system
-	ENSMMUG00000054791	0.18156	-0.404855	1.66692	2.4412	-0.432935	-0.712259	-0.736594	0.258982	0.693606	-0.0652551	-0.745853	-0.362657	-0.890929	-0.890929	1	Neuro system
FAM50B	ENSMMUG00000039209	-0.0439796	0.567358	1.27926	2.78047	0.0776028	-0.121955	-0.587523	-0.740495	-0.0610754	-1.07519	-0.646805	-0.236829	-0.435799	-0.755048	1	Neuro system
SLC22A23	ENSMMUG00000001371	-0.698769	1.39016	1.23116	1.2485	-0.965924	-1.02819	-0.26778	0.0689982	-0.76153	-0.509248	-0.76094	0.531449	1.60288	-1.08077	1	Neuro system
TUBB2B	ENSMMUG00000023785	0.819105	1.41499	1.83409	1.74032	-0.649247	-0.705742	-0.692506	-0.652754	-0.669036	-0.689555	-0.655255	-0.403467	0.0758878	-0.76683	1	Neuro system
WRNIP1	ENSMMUG00000007143	0.0323946	-0.450694	1.92036	1.9602	-0.114696	-0.644234	-0.56515	1.05754	-0.404014	0.503587	-1.06781	-0.406167	-1.00827	-0.813048	1	Neuro system
-	ENSMMUG00000054084	-0.294712	3.45476	-0.0997	0.0299008	-0.314917	-0.3115	-0.294417	-0.214096	-0.308951	-0.334978	-0.334978	-0.334978	-0.334978	-0.306458	1	Neuro system
HUS1B	ENSMMUG00000023562	-0.395054	0.624145	1.18552	1.98325	-0.489242	-1.02419	-0.983143	0.583917	-0.454885	1.46334	-1.22314	-0.245688	-0.724434	-0.300397	1	Neuro system
Metazoa_SRP	ENSMMUG00000055245	-0.48259	-0.48259	-0.48259	2.58948	-0.48259	1.49412	1.22489	-0.48259	-0.48259	-0.48259	-0.48259	-0.48259	-0.48259	-0.48259	1	Neuro system
-	ENSMMUG00000041221	-0.165108	-0.101935	-0.296576	3.46806	-0.296576	-0.235251	-0.296576	-0.296576	-0.296576	-0.296576	-0.296576	-0.296576	-0.296576	-0.296576	1	Neuro system
NPAP1	ENSMMUG00000051503	-0.436232	2.02629	0.612658	2.47386	-0.514756	-0.496442	-0.514756	-0.467608	-0.39294	-0.514756	-0.485014	-0.388406	-0.476133	-0.425767	1	Neuro system
-	ENSMMUG00000054594	0.0520852	1.21367	1.95401	2.03304	-0.823569	-0.108763	-0.823569	-0.429245	-0.0311629	-0.823569	-0.823569	-0.421006	-0.392869	-0.575483	1	Neuro system
-	ENSMMUG00000023507	0.0114274	0.687746	0.84533	3.0937	-0.51807	-0.50469	-0.473924	-0.492546	-0.434474	-0.507893	-0.546975	-0.52197	-0.439966	-0.197693	1	Neuro system
-	ENSMMUG00000046479	0.0408236	2.57059	0.960759	1.64604	-0.570749	-0.468864	-0.526745	-0.570749	-0.401331	-0.570749	-0.570749	-0.520542	-0.570749	-0.446986	1	Neuro system
Metazoa_SRP	ENSMMUG00000058385	3.33029	-0.338452	-0.338452	-0.338452	-0.338452	0.731133	-0.338452	-0.338452	-0.338452	-0.338452	-0.338452	-0.338452	-0.338452	-0.338452	1	Neuro system
-	ENSMMUG00000060166	-0.275854	2.63015	-0.161263	2.03469	-0.447019	-0.447019	-0.447019	-0.447019	-0.447019	-0.447019	-0.447019	-0.447019	-0.447019	-0.20455	1	Neuro system
CHRNA7	ENSMMUG00000022577	0.818483	0.768033	-0.463653	0.936299	-0.821389	-0.870334	-0.0434453	2.72099	-0.562526	-0.642596	-0.714883	-0.102189	-0.647109	-0.375681	1	Neuro system
-	ENSMMUG00000059479	-0.640301	-0.152414	2.04359	2.45243	-0.550964	-0.610291	-0.548011	-0.143138	-0.587426	0.314638	-0.307855	-0.405751	-0.0435995	-0.820913	1	Neuro system
FAM189A1	ENSMMUG00000019340	0.142552	1.37457	1.21499	0.582101	-0.804463	-0.768624	-0.85496	1.84458	-0.862309	1.00812	-0.875469	-0.816968	-0.524962	-0.659153	1	Neuro system
-	ENSMMUG00000059797	-0.382254	-0.105689	-0.300289	2.23882	-0.545397	-0.517804	-0.707376	2.2208	-0.707376	0.460693	-0.707376	-0.707376	-0.107697	-0.131676	1	Neuro system
Metazoa_SRP	ENSMMUG00000054589	2.31196	-0.538978	0.650914	2.04449	-0.538978	-0.538978	-0.538978	-0.538978	0.382415	-0.538978	-0.538978	-0.538978	-0.538978	-0.538978	1	Neuro system
U6	ENSMMUG00000059463	0.0794095	0.794853	-0.562226	2.92641	-0.562226	-0.562226	-0.562226	-0.562226	-0.562226	-0.562226	-0.562226	0.912665	-0.562226	0.346701	1	Neuro system
Metazoa_SRP	ENSMMUG00000054624	-0.49	-0.49	-0.49	1.66372	-0.49	-0.49	-0.49	1.29378	-0.49	-0.49	-0.49	-0.49	2.4325	-0.49	1	Neuro system
Metazoa_SRP	ENSMMUG00000059496	-0.137142	-0.327092	0.469183	3.11245	-0.540226	-0.540226	-0.540226	0.0648298	-0.540226	0.907941	-0.540226	-0.30859	-0.540226	-0.540226	1	Neuro system
-	ENSMMUG00000064307	-0.424119	-0.145822	2.38927	2.21337	-0.180798	-0.465138	-0.751276	-0.0146488	-0.222607	-0.163585	-0.673831	-0.375267	-0.550131	-0.635415	1	Neuro system
U3	ENSMMUG00000054232	-0.148063	-0.0574542	-0.118865	3.30829	-0.600308	-0.552985	-0.201039	0.375247	-0.575197	-0.0251172	-0.524267	-0.489959	-0.545811	0.155532	1	Neuro system
GPR176	ENSMMUG00000006039	0.301084	2.57513	0.765962	1.34065	-0.391369	-0.633214	-0.725064	-0.360745	-0.557292	0.548594	-0.817068	-0.655669	-0.633896	-0.757096	1	Neuro system
SRP14	ENSMMUG00000016061	-1.21307	0.0614898	0.379939	1.64581	0.535825	-0.525835	-1.27205	0.817397	-0.116741	-0.0196503	-1.33522	1.16778	1.08897	-1.21465	1	Neuro system
PAK6	ENSMMUG00000020534	2.82507	-0.0843792	0.798594	-0.31571	-0.189683	-0.46357	-0.794755	-0.831783	0.634111	-0.767322	-0.902079	-0.562519	0.75428	-0.100259	1	Neuro system
ANKRD63	ENSMMUG00000040683	3.21804	-0.0136771	-0.278461	-0.0827019	-0.431098	-0.458031	-0.496024	-0.496024	-0.159084	-0.32045	-0.465174	-0.496024	-0.455962	0.93467	1	Neuro system
RHOV	ENSMMUG00000058743	0.884099	0.228288	-0.610219	1.93222	-0.610219	-0.610219	-0.610219	-0.564442	2.30718	-0.610219	-0.581343	-0.0844686	-0.46022	-0.610219	1	Neuro system
VPS18	ENSMMUG00000014539	-0.280371	0.262354	0.952495	1.92378	-0.102644	-1.09048	-0.0801709	1.13965	0.703216	0.688351	-1.30825	-0.494372	-0.893172	-1.42038	1	Neuro system
Metazoa_SRP	ENSMMUG00000053352	-0.928728	-0.0709383	1.77962	2.01142	-0.928728	0.332492	0.977789	-0.928728	0.119876	0.0426663	-0.928728	-0.617976	0.0686879	-0.928728	1	Neuro system
Metazoa_SRP	ENSMMUG00000050513	3.4744	-0.267261	-0.267261	-0.267261	-0.267261	-0.267261	-0.267261	-0.267261	-0.267261	-0.267261	-0.267261	-0.267261	-0.267261	-0.267261	1	Neuro system
ITPKA	ENSMMUG00000008169	3.04506	-0.494011	0.517241	-0.352384	-0.566917	-0.547315	-0.580298	-0.555539	-0.577724	-0.573182	-0.346007	0.509319	0.830083	-0.308325	1	Neuro system
HAUS2	ENSMMUG00000001548	0.32226	-0.0781823	-0.265986	2.83076	-0.284672	-0.672624	-0.563996	-0.767263	-0.153125	0.119631	-0.604316	0.470294	0.981085	-1.33386	1	Neuro system
-	ENSMMUG00000055926	-0.712942	0.429039	0.729314	2.80988	-0.712942	-0.712942	-0.712942	0.259633	-0.712942	-0.324975	-0.508438	1.02463	-0.447369	-0.406998	1	Neuro system
Metazoa_SRP	ENSMMUG00000050809	0.999143	-0.135373	-0.0962652	2.95241	-0.178445	-0.880963	-0.170759	0.177348	0.334298	-0.0366277	-0.880963	-0.610857	-0.591979	-0.880963	1	Neuro system
FRMD5	ENSMMUG00000022777	-0.139371	0.368268	1.67889	1.78592	1.43504	0.329601	-0.881885	-0.842777	-0.852414	0.200382	-0.878801	-0.608651	-0.813808	-0.780393	1	Neuro system
Metazoa_SRP	ENSMMUG00000053439	-0.342249	0.253194	1.42254	2.92576	-0.526594	-0.526594	-0.464695	-0.526594	-0.526594	0.135702	-0.526594	-0.244099	-0.526594	-0.526594	1	Neuro system
Metazoa_SRP	ENSMMUG00000060014	-0.164573	-0.134716	1.62736	2.45237	-0.511264	-0.481894	-0.509378	-0.683682	-0.683682	1.18133	-0.683682	-0.285933	-0.683682	-0.438562	1	Neuro system
-	ENSMMUG00000052614	-0.674914	-0.317699	-0.39295	2.69215	-0.338335	-0.281001	-0.674914	-0.674914	-0.238237	1.75223	-0.51499	0.29565	-0.674914	0.0428386	1	Neuro system
U6	ENSMMUG00000064637	2.72953	-0.516984	-0.516984	1.4443	-0.516984	0.114008	-0.516984	-0.516984	0.882001	-0.516984	-0.516984	-0.516984	-0.516984	-0.516984	1	Neuro system
Metazoa_SRP	ENSMMUG00000056525	0.579501	1.82413	-0.536727	2.49779	-0.536727	-0.536727	-0.536727	-0.536727	-0.536727	0.465845	-0.536727	-0.536727	-0.536727	-0.536727	1	Neuro system
-	ENSMMUG00000052233	-0.132442	-0.28792	-0.274059	3.43241	-0.367288	-0.31098	-0.366969	-0.352481	-0.130995	-0.291106	-0.35485	0.193647	-0.360445	-0.396526	1	Neuro system
-	ENSMMUG00000056847	-0.28109	-0.100866	-0.172881	3.36543	-0.442721	-0.254233	-0.442721	-0.442721	-0.233771	-0.152374	-0.442721	0.48611	-0.442721	-0.442721	1	Neuro system
-	ENSMMUG00000059451	-0.521086	1.72907	0.931012	1.94285	-0.86542	-0.765033	-0.86542	-0.86542	0.915145	-0.324191	-0.86542	0.272364	-0.706641	-0.0118106	1	Neuro system
CTXN2	ENSMMUG00000043753	0.301485	0.800797	1.37946	2.7574	-0.550187	-0.550187	-0.550187	-0.550187	-0.471543	-0.440908	-0.550187	-0.550187	-0.475382	-0.550187	1	Neuro system
SHC4	ENSMMUG00000009833	-0.238581	3.44019	-0.276523	-0.38958	-0.159332	0.137123	-0.329594	-0.341583	-0.380727	-0.286922	-0.39949	-0.133977	-0.311775	-0.329232	1	Neuro system
EID1	ENSMMUG00000053673	0.182834	0.0764387	1.03631	2.62192	0.461748	0.478485	-0.711164	-0.0861844	-0.498634	0.117074	-1.19866	-0.464081	-0.773313	-1.24277	1	Neuro system
-	ENSMMUG00000049831	-0.401492	-0.975557	0.685445	1.92558	-1.28809	-0.598813	0.200396	-0.844474	0.240116	0.835434	-0.448579	1.4292	0.528918	-1.28809	1	Neuro system
-	ENSMMUG00000056522	1.68797	-0.827184	0.399864	2.35049	-0.837467	0.172557	-0.326965	-0.752524	0.518014	-0.0980858	-0.845804	0.155552	-0.591231	-1.00519	1	Neuro system
-	ENSMMUG00000050608	0.6695	-0.613403	0.00410107	3.22566	-0.621285	-0.147967	-0.749856	-0.0719552	-0.249433	-0.170386	-0.322228	-0.00835813	-0.194529	-0.749856	1	Neuro system
Metazoa_SRP	ENSMMUG00000060278	0.833163	-0.683969	-0.683969	2.06563	-0.683969	0.200639	-0.683969	-0.683969	0.296673	2.04134	0.0343089	-0.683969	-0.683969	-0.683969	1	Neuro system
GLDN	ENSMMUG00000005976	-0.148788	3.22277	0.659148	0.435241	-0.263195	-0.423351	-0.434941	-0.0880089	-0.564318	-0.265742	-0.528549	-0.520902	-0.536448	-0.542913	1	Neuro system
Metazoa_SRP	ENSMMUG00000061070	-0.575608	-0.292727	1.2107	2.81799	-0.575608	-0.575608	0.232757	-0.575608	-0.229801	0.865945	-0.575608	-0.575608	-0.575608	-0.575608	1	Neuro system
Metazoa_SRP	ENSMMUG00000062016	-0.818009	-0.354785	0.278913	3.15135	-0.381545	-0.818009	0.0644691	0.497016	-0.251742	0.362279	-0.610626	-0.0628526	-0.548697	-0.507757	1	Neuro system
Metazoa_SRP	ENSMMUG00000064537	1.21477	-0.482265	-0.482265	2.59339	-0.482265	1.49675	-0.482265	-0.482265	-0.482265	-0.482265	-0.482265	-0.482265	-0.482265	-0.482265	1	Neuro system
DNAAF4	ENSMMUG00000000863	-0.129341	0.26801	0.2937	2.32571	-0.595831	-0.849484	0.680004	-0.627665	1.82281	-0.56878	-0.801117	-0.774206	-0.681789	-0.362027	1	Neuro system
Metazoa_SRP	ENSMMUG00000041222	-0.560962	0.40242	-0.560962	1.09008	0.800631	-0.560962	-0.102132	2.85766	-0.560962	-0.560962	-0.560962	-0.560962	-0.560962	-0.560962	1	Neuro system
-	ENSMMUG00000052568	-1.1048	0.926107	0.680431	2.78966	-0.351451	-0.955512	-0.639283	-0.0867306	-0.706894	0.243515	-0.790337	-0.0478204	0.15759	-0.114473	1	Neuro system
-	ENSMMUG00000063795	2.78031	0.904071	0.264048	-0.237357	-0.178078	0.699467	-0.170917	-0.339603	0.441188	-0.832626	-0.832626	-0.832626	-0.832626	-0.832626	1	Neuro system
-	ENSMMUG00000065309	-0.457008	2.87178	0.0620133	1.65591	-0.457008	-0.321053	-0.457008	-0.457008	-0.15558	-0.457008	-0.457008	-0.457008	-0.457008	-0.457008	1	Neuro system
FOXB1	ENSMMUG00000001379	-0.368032	1.01431	-0.308244	3.23422	-0.368032	-0.368032	-0.349995	-0.368032	-0.298587	-0.368032	-0.368032	-0.347452	-0.368032	-0.368032	1	Neuro system
-	ENSMMUG00000058008	-0.420838	0.40887	2.11123	2.21616	-0.484862	-0.719952	0.124386	0.360571	-0.20985	-0.631176	-0.714138	-0.504915	-0.73632	-0.799161	1	Neuro system
C2CD4A	ENSMMUG00000060717	-0.00516814	0.0980697	0.173538	2.60477	-0.655158	-0.714018	-0.714018	-0.44801	-0.561289	-0.714018	1.41146	-0.646126	0.883985	-0.714018	1	Neuro system
C2CD4B	ENSMMUG00000058198	-0.490947	0.586055	0.550583	2.98996	-0.467567	-0.655413	-0.691559	0.228359	-0.591052	-0.54372	-0.648371	-0.642645	0.659724	-0.283408	1	Neuro system
SNX22	ENSMMUG00000021122	-0.199652	1.7019	0.48103	2.25776	0.0145874	-0.679209	-0.681682	-0.397533	-1.01666	0.771647	-0.078295	-0.212408	-0.82817	-1.13331	1	Neuro system
Metazoa_SRP	ENSMMUG00000053704	3.3826	-0.354807	-0.354807	0.397809	-0.354807	-0.354807	-0.354807	-0.354807	-0.354807	-0.354807	-0.354807	0.122469	-0.354807	-0.354807	1	Neuro system
-	ENSMMUG00000049680	2.22396	-0.57766	0.167859	2.27196	-0.651835	-0.57004	-0.651835	-0.335975	0.345597	-0.525837	-0.651835	-0.409991	-0.479337	-0.155032	1	Neuro system
Metazoa_SRP	ENSMMUG00000057912	0.141261	-0.63524	-0.207284	2.93944	0.201016	0.715627	-0.144983	-0.680059	-0.194634	-0.347568	0.398127	0.0417429	-0.944099	-1.28334	1	Neuro system
IGDCC4	ENSMMUG00000021788	-0.661284	1.8133	0.312057	2.03315	-0.712351	-0.956956	-0.120242	0.793741	-0.629503	-0.517958	-0.756977	0.714671	-0.227221	-1.08442	1	Neuro system
MAP2K1	ENSMMUG00000016840	1.05609	-0.120892	1.26718	0.982843	-0.518188	-0.750069	-0.291874	-0.538173	1.70956	1.01938	-0.992852	-0.642851	-0.668671	-1.51147	1	Neuro system
Metazoa_SRP	ENSMMUG00000064444	-0.588422	0.889169	-0.588422	1.94387	-0.588422	-0.588422	-0.588422	-0.588422	-0.588422	1.9215	-0.588422	-0.588422	1.12968	-0.588422	1	Neuro system
LCTL	ENSMMUG00000017447	-0.41151	3.43665	0.0530494	0.0152229	-0.347525	-0.41151	-0.41151	-0.37938	-0.217809	-0.296157	-0.289901	-0.165496	-0.253585	-0.320544	1	Neuro system
Metazoa_SRP	ENSMMUG00000058132	-0.393012	-0.393012	2.24517	2.47097	-0.393012	-0.393012	-0.393012	-0.393012	-0.393012	-0.393012	-0.393012	-0.393012	-0.393012	-0.393012	1	Neuro system
-	ENSMMUG00000055954	-0.607411	-0.3498	1.38194	2.9334	-0.608742	-0.28509	-0.379693	-0.197372	0.175305	-0.310961	0.00729469	-0.637394	-0.247273	-0.874203	1	Neuro system
U6	ENSMMUG00000059868	2.15593	0.611526	0.108827	0.0308234	-0.439387	-0.229566	-0.433104	-0.869433	-0.516945	-0.841071	-0.831714	-0.792829	-0.0687747	2.11572	1	Neuro system
-	ENSMMUG00000064021	-1.05475	-0.651932	0.964615	2.02283	-0.732126	0.087657	-0.891182	-0.865593	1.26461	-0.235774	-0.597462	0.628919	1.01596	-0.95577	1	Neuro system
LARP6	ENSMMUG00000004429	0.125418	0.678524	1.50524	2.71884	-0.238077	-0.341288	-0.368744	-0.231351	-0.701423	-0.698828	-0.741848	-0.590242	-0.532422	-0.583802	1	Neuro system
THAP10	ENSMMUG00000015085	0.267299	0.26982	0.728831	2.72981	-0.20032	-0.194539	-0.856338	0.679393	0.549273	-0.673115	-0.971855	-0.556478	-0.782746	-0.989037	1	Neuro system
U2	ENSMMUG00000047553	-0.367156	0.119521	-0.168944	3.36119	0.0743031	-0.317962	-0.364988	0.0034055	-0.663227	0.134546	-0.382881	-0.493087	-0.481195	-0.453524	1	Neuro system
CELF6	ENSMMUG00000010687	-0.146334	1.21653	2.15635	1.93352	-0.587321	-0.559392	-0.703697	0.0176204	-0.455554	-0.389517	-0.753248	-0.437888	-0.696223	-0.594842	1	Neuro system
HCN4	ENSMMUG00000016564	-0.179893	1.80428	1.95669	1.63414	-0.181599	-0.59854	-0.657121	-0.631986	-0.613827	-0.657121	-0.657121	-0.609008	-0.615941	0.0070503	1	Neuro system
Metazoa_SRP	ENSMMUG00000057914	-1.1275	0.600935	0.338271	2.53995	0.653672	-0.910916	-0.798806	-0.31401	-0.659608	0.170011	-0.0586548	-0.355894	-1.09016	1.01271	1	Neuro system
INSYN1	ENSMMUG00000038117	0.341917	0.288773	1.55317	2.34375	1.00446	-0.000685321	-0.571611	-0.692119	-0.725326	-0.552139	-0.824821	-0.737456	-0.763502	-0.664411	1	Neuro system
STOML1	ENSMMUG00000002568	0.823307	1.14419	0.757225	2.35038	-0.161228	-0.690737	-0.865202	0.618909	-0.631527	-0.3119	-1.03291	-0.220231	-0.684707	-1.09557	1	Neuro system
-	ENSMMUG00000045257	-0.8614	0.195855	1.58254	1.49034	-0.00871377	-0.689413	-0.455787	2.0479	-0.863952	-0.222344	-0.952456	-0.0505648	-0.308493	-0.903513	1	Neuro system
-	ENSMMUG00000062488	-0.950668	0.06661	1.23647	2.46093	0.422228	-0.756978	-0.427955	0.343013	0.628907	0.183976	-0.964398	-0.218791	-0.997261	-1.02608	1	Neuro system
ISLR2	ENSMMUG00000001835	2.83154	0.770886	0.967973	0.0760655	-0.638084	-0.606966	-0.467086	0.588634	-0.63557	-0.585582	-0.646536	-0.42229	-0.646536	-0.586451	1	Neuro system
Metazoa_SRP	ENSMMUG00000050946	-0.899928	-0.229548	1.74586	1.97231	0.363377	-0.899928	0.0579168	-0.899928	0.329329	0.238818	-0.899928	0.921515	-0.899928	-0.899928	1	Neuro system
-	ENSMMUG00000061640	-0.938036	-0.30126	0.931726	1.74969	-0.701048	-1.05717	-0.0971242	1.62523	-0.595139	1.29689	-0.267529	0.175129	-0.764185	-1.05717	1	Neuro system
-	ENSMMUG00000053989	0.291107	0.568155	1.08453	2.32783	-0.106766	-0.433348	-0.894036	-0.894036	1.14877	-0.894036	-0.894036	0.241055	-0.65115	-0.894036	1	Neuro system
-	ENSMMUG00000056239	-0.252299	-0.232986	1.93449	2.45467	-0.420787	-0.588074	-0.0807211	-0.588074	0.714156	-0.588074	-0.588074	-0.588074	-0.588074	-0.588074	1	Neuro system
-	ENSMMUG00000053250	-0.903503	-0.441337	0.851422	2.02992	-0.100429	-0.72426	-0.899063	0.613251	1.18925	0.546963	-0.553088	0.735005	-0.929932	-1.4142	1	Neuro system
-	ENSMMUG00000054248	0.286808	0.0867617	0.654647	1.762	-0.396437	-0.525184	-0.887931	0.332486	-0.974122	1.51973	-1.49313	-0.0328509	0.95179	-1.28457	1	Neuro system
-	ENSMMUG00000054259	0.311453	1.12576	1.10257	2.74016	-0.613863	-0.493967	-0.613863	-0.613863	-0.613863	-0.244486	-0.516511	-0.613863	-0.487439	-0.468221	1	Neuro system
LINGO1	ENSMMUG00000001782	2.05139	0.391082	1.54646	1.65801	-0.642027	-0.648067	-0.670729	-0.660324	-0.50053	-0.0682934	-0.622307	-0.663141	-0.662497	-0.509025	1	Neuro system
ACSBG1	ENSMMUG00000011839	0.44624	2.04858	1.918	1.22445	-0.542649	-0.699443	-0.687539	-0.220987	-0.708535	-0.667473	-0.518333	-0.538913	-0.354203	-0.699193	1	Neuro system
CRABP1	ENSMMUG00000009393	0.317346	2.89826	0.311304	1.30889	-0.555554	-0.513186	-0.577683	-0.647075	-0.172118	-0.110843	-0.647075	-0.383164	-0.647075	-0.582019	1	Neuro system
CHRNB4	ENSMMUG00000007541	-0.605061	0.49976	-0.605061	2.55067	-0.605061	-0.605061	-0.605061	-0.430815	-0.605061	0.229034	-0.605061	1.79641	-0.462321	0.0526929	1	Neuro system
mml-mir-184	ENSMMUG00000026851	-0.308853	3.43223	-0.308853	0.274007	-0.308853	-0.308853	-0.308853	-0.308853	-0.308853	-0.308853	-0.308853	-0.308853	-0.308853	-0.308853	1	Neuro system
MINAR1	ENSMMUG00000000534	-0.780546	2.60246	0.472944	1.45555	-0.144182	-0.115314	-0.699509	-0.500757	-0.344171	-0.430005	-0.709163	-0.76862	-0.762205	0.723513	1	Neuro system
TLNRD1	ENSMMUG00000052973	-0.449266	-0.0045532	2.1791	1.94375	-0.416882	-0.722912	-0.890892	0.775694	-0.705898	0.0157975	-0.847242	-0.308226	0.310238	-0.878705	1	Neuro system
-	ENSMMUG00000039574	1.92015	-0.366592	-0.308353	2.73254	-0.358931	-0.411259	-0.418749	-0.417256	-0.233639	-0.41437	-0.437785	-0.414221	-0.431154	-0.440383	1	Neuro system
-	ENSMMUG00000053346	1.12477	-0.319532	-0.322986	3.10304	-0.309201	-0.287531	-0.597627	-0.149314	-0.0469797	0.0379686	-0.630885	-0.322382	-0.54492	-0.734419	1	Neuro system
Metazoa_SRP	ENSMMUG00000057551	-0.671537	2.87744	-0.0490162	0.680067	0.0715641	-0.671537	0.079694	-0.671537	-0.671537	-0.00170428	-0.671537	1.04272	-0.671537	-0.671537	1	Neuro system
Metazoa_SRP	ENSMMUG00000059698	-0.564951	-0.564951	-0.564951	2.7814	-0.564951	0.152781	-0.564951	1.28276	-0.564951	-0.564951	0.017828	0.849788	-0.564951	-0.564951	1	Neuro system
SH3GL3	ENSMMUG00000013669	1.42403	1.85181	1.68387	1.03839	-0.638451	-0.634705	-0.638451	-0.474493	-0.547083	-0.638451	-0.638451	-0.623682	-0.63055	-0.533781	1	Neuro system
C7H15orf40	ENSMMUG00000015890	0.217438	0.0713314	1.70906	2.40068	-0.410294	-0.68601	-0.906964	-0.261417	-0.751576	0.497738	-0.561762	0.362503	-0.664834	-1.01589	1	Neuro system
NMB	ENSMMUG00000045634	-0.830613	1.80055	0.787288	2.33476	-0.628055	-0.817082	-0.624948	-0.423112	0.351198	-0.107512	0.0132264	-0.397298	-0.661715	-0.79669	1	Neuro system
Metazoa_SRP	ENSMMUG00000054764	0.851737	-0.405958	-0.386628	2.80437	-0.427246	-0.503557	-0.774474	-0.0770314	-0.323982	1.31214	-0.444508	-0.240463	-0.774474	-0.609927	1	Neuro system
-	ENSMMUG00000063869	-1.26001	0.739039	-0.117041	1.96707	0.766104	0.607531	0.139787	0.948982	0.692791	-0.824584	-1.31225	-0.276021	-0.993247	-1.07815	1	Neuro system
-	ENSMMUG00000053180	1.10431	1.40009	0.200039	2.576	-0.526777	-0.70729	-0.524802	-0.70729	-0.70729	-0.381861	-0.70729	-0.0826551	-0.484525	-0.450662	1	Neuro system
ACAN	ENSMMUG00000000554	0.155624	2.00435	0.649453	1.88172	-0.540659	-0.790103	-0.621988	-0.74835	-0.574351	1.00869	-0.790103	-0.758134	-0.7559	-0.120255	1	Neuro system
Metazoa_SRP	ENSMMUG00000043754	-0.354634	-0.354634	0.334712	3.3871	-0.354634	-0.354634	-0.354634	-0.354634	0.179161	-0.354634	-0.354634	-0.354634	-0.354634	-0.354634	1	Neuro system
RLBP1	ENSMMUG00000014420	3.06407	-0.162647	0.509939	1.08377	-0.503766	-0.494727	-0.556823	-0.237106	-0.556823	-0.556823	-0.506403	-0.250826	-0.42587	-0.405962	1	Neuro system
-	ENSMMUG00000056869	0.110216	1.07426	2.24428	1.97029	-0.539905	-0.539905	-0.539905	-0.539905	-0.539905	-0.539905	-0.539905	-0.539905	-0.539905	-0.539905	1	Neuro system
mml-mir-9-3	ENSMMUG00000032765	0.612526	-0.0602553	1.19473	2.99141	-0.473841	-0.473841	-0.473841	-0.473841	-0.473841	-0.473841	-0.473841	-0.473841	-0.473841	-0.473841	1	Neuro system
KIF7	ENSMMUG00000056204	-0.610711	1.10325	0.368716	2.07784	-0.424306	-0.606148	-0.958169	0.996782	-0.890373	0.154077	-0.950238	1.24366	-0.975413	-0.528967	1	Neuro system
MESP1	ENSMMUG00000010586	-0.076263	0.424304	0.185746	1.73487	-0.486284	-0.517079	-0.560519	-0.560519	-0.560519	-0.560519	-0.560519	-0.560519	-0.560519	2.65834	1	Neuro system
Metazoa_SRP	ENSMMUG00000055943	0.59407	-0.365872	0.469421	1.27972	0.133045	-0.841099	-0.929962	1.92963	-0.634432	1.53397	-0.641344	-0.667222	-0.929962	-0.929962	1	Neuro system
-	ENSMMUG00000058560	0.544715	1.48073	0.485043	0.675324	0.346995	-1.29444	0.178176	1.40301	-0.262547	0.654006	-0.837463	-1.30084	-0.334578	-1.73813	1	Neuro system
Metazoa_SRP	ENSMMUG00000055869	-0.756816	-0.0920385	-0.756816	2.66106	0.80912	0.709331	-0.440203	-0.756816	-0.756816	0.937029	-0.756816	0.326917	-0.370323	-0.756816	1	Neuro system
Metazoa_SRP	ENSMMUG00000056070	0.76005	0.206897	-0.753401	2.53811	0.00061811	-0.753401	-0.753401	0.382493	-0.557749	1.42156	-0.753401	-0.231569	-0.753401	-0.753401	1	Neuro system
Metazoa_SRP	ENSMMUG00000053693	0.264305	-0.40001	-0.40001	3.21193	0.923869	-0.40001	-0.40001	-0.40001	-0.40001	-0.40001	-0.40001	-0.40001	-0.40001	-0.40001	1	Neuro system
-	ENSMMUG00000056190	1.94789	1.13607	0.0504864	0.961896	0.743083	-0.525515	-1.29353	-0.0555258	0.584454	-0.336361	-1.6289	-0.931068	-0.710226	0.0572504	1	Neuro system
RGMA	ENSMMUG00000017381	-0.515075	1.48231	0.354668	2.57377	0.303896	-0.360672	0.515037	-0.682578	-0.84964	-0.857637	-0.9127	-0.0919756	-0.286566	-0.672842	1	Neuro system
-	ENSMMUG00000053334	0.460325	3.09206	0.543244	-0.211763	0.214804	-0.445979	-0.260146	-0.868651	-0.556279	-0.651622	-0.754251	-0.0355127	0.17128	-0.697506	1	Neuro system
Metazoa_SRP	ENSMMUG00000062699	-0.338289	3.33109	-0.338289	-0.338289	-0.338289	-0.338289	-0.338289	-0.338289	-0.338289	-0.338289	-0.338289	-0.338289	0.728377	-0.338289	1	Neuro system
-	ENSMMUG00000052374	-0.0213285	-0.562841	-0.347656	3.03181	-0.457629	1.3485	-0.510711	-0.375173	-0.40921	-0.033412	-0.517294	-0.182258	-0.419521	-0.543284	1	Neuro system
ADAMTS17	ENSMMUG00000021160	-0.910502	1.98094	-0.420931	2.11888	0.00408466	-0.297765	0.595811	-0.00352998	-0.188742	0.334635	-1.28324	-0.506885	-0.90244	-0.520314	1	Neuro system
-	ENSMMUG00000060063	-0.295211	-0.674105	1.02145	2.14245	-0.0358303	-0.798724	-0.95188	0.033824	-0.782097	1.64327	-0.827522	0.708514	-0.790385	-0.393746	1	Neuro system
TARS3	ENSMMUG00000000278	-0.477396	0.584207	0.442323	2.86332	0.746231	0.318544	0.246158	-0.762427	-0.587275	-0.758549	-0.69147	-0.390456	-0.695552	-0.837656	1	Neuro system
-	ENSMMUG00000064946	-0.245245	-0.026282	-0.641569	3.08122	-0.0782273	-0.528848	-0.925477	0.606133	0.393586	-0.314507	-0.603425	0.442683	-0.716365	-0.443676	1	Neuro system
TPPP2	ENSMMUG00000020749	-0.498998	0.382037	-0.498998	3.27579	-0.0839287	-0.013224	0.340223	-0.498998	-0.498998	-0.498998	-0.498998	-0.498998	-0.498998	0.0910904	1	Neuro system
ARHGEF40	ENSMMUG00000006457	-0.860104	0.722639	2.09052	2.17722	-0.207301	-0.753917	-0.613206	0.242106	-0.315714	-0.156051	-0.500407	-0.522758	-0.445584	-0.857441	1	Neuro system
Metazoa_SRP	ENSMMUG00000050573	-0.34037	0.0825315	-0.34037	3.42842	-0.34037	-0.2471	-0.34037	0.139852	-0.34037	-0.34037	-0.34037	-0.34037	-0.34037	-0.34037	1	Neuro system
CEBPE	ENSMMUG00000056675	-0.859406	0.844815	-0.00684732	0.844103	1.67809	-0.957759	-1.05121	1.59425	0.130807	-0.234716	-1.08676	0.83547	-0.920405	-0.810431	1	Neuro system
BCL2L2-PABPN1	ENSMMUG00000014747	0.943162	0.469563	1.31344	2.28478	-0.558635	-0.907174	-1.09201	0.311224	-0.276166	-0.0501432	-0.985516	0.113469	-0.442993	-1.12299	1	Neuro system
SLC22A17	ENSMMUG00000014748	0.320304	0.849519	1.54416	2.6038	-0.549436	-0.589317	-0.670031	-0.22343	-0.418649	-0.507212	-0.695387	-0.609887	-0.625919	-0.428519	1	Neuro system
EFS	ENSMMUG00000014750	-0.24705	1.44716	0.135466	2.96274	-0.371142	-0.455384	-0.52956	-0.311216	-0.491543	-0.0876041	-0.633049	-0.507554	-0.495791	-0.415477	1	Neuro system
IL25	ENSMMUG00000014751	-0.586529	2.379	0.772252	1.82121	-0.206894	-0.268844	-0.713681	-0.713681	-0.549305	0.428366	-0.713681	-0.713681	-0.400977	-0.533561	1	Neuro system
CMTM5	ENSMMUG00000014752	-0.274396	3.05151	0.746444	0.991772	-0.32069	-0.377087	-0.494755	-0.464424	-0.480587	-0.428131	-0.510071	-0.448908	-0.491374	-0.499302	1	Neuro system
mml-mir-208a	ENSMMUG00000026901	-0.539801	2.41092	-0.39166	1.0039	1.5426	0.726346	-0.603137	-0.603137	-0.603137	-0.603137	-0.603137	-0.530343	-0.603137	-0.603137	1	Neuro system
CPNE6	ENSMMUG00000007360	0.986148	1.81512	0.105584	2.21869	-0.370821	-0.349591	-0.691129	-0.682591	-0.704078	-0.683697	-0.708549	0.436252	-0.687284	-0.684052	1	Neuro system
-	ENSMMUG00000050036	0.070552	-0.411778	-0.189136	3.37607	-0.271881	-0.458078	-0.3921	-0.112141	0.368129	-0.339676	-0.35327	-0.346739	-0.424979	-0.514979	1	Neuro system
-	ENSMMUG00000055618	-0.352775	0.110813	0.568379	3.30075	-0.260816	-0.243925	-0.491601	-0.399308	-0.0757707	-0.512003	-0.547148	-0.19651	-0.220188	-0.679896	1	Neuro system
FOXG1	ENSMMUG00000021444	3.47427	-0.272866	-0.272866	-0.251819	-0.272866	-0.254809	-0.272866	-0.255434	-0.272866	-0.272866	-0.272866	-0.272866	-0.272866	-0.256415	1	Neuro system
-	ENSMMUG00000038390	3.47173	-0.131474	-0.278355	-0.278355	-0.278355	-0.278355	-0.278355	-0.278355	-0.278355	-0.278355	-0.278355	-0.278355	-0.278355	-0.278355	1	Neuro system
U6	ENSMMUG00000054182	-0.390806	-0.339617	-0.785532	1.40755	-0.393989	-1.28081	-1.28081	0.0551464	0.253272	-0.214966	-0.157162	0.0830594	0.543186	2.50148	1	Neuro system
-	ENSMMUG00000062130	-0.562425	-0.31022	-0.388146	2.89596	-0.255255	-0.4755	-0.347209	0.303979	1.52967	-0.543535	-0.518764	-0.477098	-0.265307	-0.586144	1	Neuro system
-	ENSMMUG00000062346	-0.663896	0.12296	-0.479792	2.49522	-0.233774	-0.563732	-0.705641	1.90533	0.545337	-0.364817	-0.678669	-0.605966	-0.509683	-0.262875	1	Neuro system
-	ENSMMUG00000056320	-0.580693	-0.332835	0.365607	2.66685	0.378714	1.68971	-0.351322	-0.59477	-0.356073	-0.569669	-0.480901	-0.494409	-0.617841	-0.722364	1	Neuro system
U6	ENSMMUG00000065338	0.0554839	0.419063	-0.315485	2.41144	-0.644404	-0.887112	-0.568751	0.859759	1.57622	-0.5043	-0.668612	-0.730161	-0.959661	-0.0434873	1	Neuro system
Metazoa_SRP	ENSMMUG00000060232	-0.343233	-0.343233	-0.343233	3.3052	-0.343233	-0.343233	-0.343233	-0.343233	-0.343233	-0.343233	-0.343233	0.813603	-0.343233	-0.343233	1	Neuro system
NPAS3	ENSMMUG00000014839	-0.0430636	2.12087	1.91607	1.31404	-0.566934	-0.538756	-0.665271	-0.681405	-0.607823	-0.32772	-0.690194	-0.399892	-0.164029	-0.665895	1	Neuro system
Metazoa_SRP	ENSMMUG00000060561	-0.519968	-0.519968	2.10104	2.32537	-0.519968	0.0903065	-0.519968	-0.519968	-0.519968	-0.519968	-0.519968	0.682958	-0.519968	-0.519968	1	Neuro system
FAM177A1	ENSMMUG00000060802	-0.783041	0.6592	0.642748	1.70957	-0.210538	-0.56645	-0.848355	-0.705812	-0.54671	0.166785	-1.24437	1.78229	0.967396	-1.0227	1	Neuro system
Metazoa_SRP	ENSMMUG00000056591	-0.579113	-0.579113	0.534283	3.04696	-0.579113	-0.19025	-0.579113	-0.579113	-0.579113	0.618901	0.05238	0.570634	-0.579113	-0.579113	1	Neuro system
INSM2	ENSMMUG00000016483	0.644321	0.0525597	2.53517	1.85661	-0.414022	-0.545119	-0.410564	-0.412662	-0.593379	-0.540138	-0.73005	-0.487036	-0.60005	-0.355645	1	Neuro system
-	ENSMMUG00000062871	-0.282301	3.29249	-0.0630068	0.813402	-0.376059	-0.376059	-0.376059	-0.376059	-0.376059	-0.376059	-0.376059	-0.376059	-0.376059	-0.376059	1	Neuro system
NKX2-8	ENSMMUG00000061299	-0.516321	0.533574	-0.0328991	2.78241	-0.516321	-0.516321	-0.516321	1.59487	-0.516321	-0.516321	-0.516321	-0.516321	-0.465455	-0.281926	1	Neuro system
U6	ENSMMUG00000056876	-0.460872	-0.460872	-0.460872	2.57842	-0.460872	-0.460872	-0.460872	-0.460872	-0.460872	-0.460872	1.92099	-0.460872	0.570176	-0.460872	1	Neuro system
SSTR1	ENSMMUG00000039337	-4.2e-05	1.33489	-0.425193	1.66555	-0.749639	-0.749639	-0.749639	0.54225	-0.713748	-0.500279	-0.749639	-0.239104	2.08387	-0.749639	1	Neuro system
-	ENSMMUG00000061753	0.54524	-0.272643	-0.193211	3.33216	-0.352864	-0.234619	-0.365081	-0.44755	0.162148	-0.390656	-0.449746	-0.425856	-0.438209	-0.469114	1	Neuro system
-	ENSMMUG00000063162	-0.126182	-0.308466	-0.512997	3.34278	-0.256043	-0.287453	-0.512997	-0.416225	-0.262968	-0.397188	-0.146726	-0.29071	0.596848	-0.421672	1	Neuro system
U6	ENSMMUG00000056011	-0.581569	0.134063	-0.581569	3.09777	-0.581569	-0.581569	-0.581569	0.434218	0.293254	0.634045	0.0592011	-0.581569	-0.581569	-0.581569	1	Neuro system
-	ENSMMUG00000052465	0.0440791	-0.294493	0.412832	3.17595	-0.202568	-0.811537	-0.688411	-0.62806	0.452582	-0.372396	-0.117102	-0.249607	0.0902712	-0.811537	1	Neuro system
Metazoa_SRP	ENSMMUG00000055921	0.232547	1.2062	0.0433887	2.19959	0.228454	-0.578353	-0.912048	-0.48252	1.30748	-0.912048	-0.912048	0.403459	-0.912048	-0.912048	1	Neuro system
-	ENSMMUG00000053288	0.398325	1.52063	-0.0143262	2.30788	-0.596275	0.0253045	-0.843815	1.02072	-0.843815	0.0487154	-0.843815	-0.843815	-0.843815	-0.491897	1	Neuro system
-	ENSMMUG00000062305	0.0550339	0.917145	2.06741	2.06249	-0.678742	-0.713936	-0.736448	-0.591562	0.38657	-0.528382	-0.535377	-0.337082	-0.71271	-0.654409	1	Neuro system
-	ENSMMUG00000053620	-0.0914877	0.28691	0.234321	3.37624	-0.39319	-0.402392	-0.406324	-0.340895	-0.328032	-0.384175	-0.39335	-0.391721	-0.404174	-0.361733	1	Neuro system
Metazoa_SRP	ENSMMUG00000060067	2.13706	0.334922	-0.238376	1.15033	-1.22398	-1.45948	-1.30377	0.238347	0.0967157	0.062083	-0.386038	0.13456	1.02595	-0.56832	1	Neuro system
-	ENSMMUG00000057868	-0.758148	0.435815	1.37919	2.79281	-0.534769	-0.346639	-0.191753	-0.19621	-0.580107	-0.668724	-0.764112	0.420156	-0.59428	-0.393229	1	Neuro system
Metazoa_SRP	ENSMMUG00000053234	2.42426	-0.257108	-0.297108	2.10162	-0.872003	-0.346371	-0.437411	0.0606816	-0.459052	0.0148419	-0.607734	-0.0266416	-0.48618	-0.811797	1	Neuro system
Metazoa_SRP	ENSMMUG00000060465	-1.26882	0.507617	-0.0669235	2.21055	0.165879	0.690119	-0.785352	0.892484	-0.338131	0.4555	-0.587129	0.661835	-1.26882	-1.26882	1	Neuro system
Metazoa_SRP	ENSMMUG00000055903	1.08772	1.32934	0.595816	2.03231	-0.884335	-1.3092	-0.876577	-0.776037	-0.335308	0.237956	-0.139314	0.442944	-0.299163	-1.10616	1	Neuro system
ABHD12B	ENSMMUG00000014667	2.40106	1.9019	-0.624796	-0.276719	-0.626357	-0.299195	-0.802447	-0.832924	-0.0781579	0.676949	-0.303921	-0.649193	0.0995538	-0.585756	1	Neuro system
-	ENSMMUG00000056844	-0.944894	0.116406	0.730557	1.96527	-0.144902	-0.710827	-0.540521	-0.944894	1.90935	0.857892	-0.944894	-0.48352	-0.204462	-0.660564	1	Neuro system
SAMD4A	ENSMMUG00000010315	0.669069	1.89203	1.11998	1.62678	0.422349	-0.313755	-0.0435685	-0.251245	-1.04503	-0.55822	-0.640817	-0.680567	-0.958792	-1.23821	1	Neuro system
Metazoa_SRP	ENSMMUG00000046299	-0.369635	-0.369635	-0.369635	3.09048	-0.369635	-0.369635	-0.369635	-0.369635	-0.369635	1.34514	-0.369635	-0.369635	-0.369635	-0.369635	1	Neuro system
-	ENSMMUG00000063996	-0.641378	-0.108661	0.0569102	2.09632	-0.645109	-0.815596	-0.0333501	0.328586	-0.528649	1.79525	-0.696775	0.88441	-0.218618	-1.47334	1	Neuro system
Metazoa_SRP	ENSMMUG00000061263	-0.0372156	0.211402	0.368723	3.01955	-0.643569	-0.407868	-0.643569	0.873392	-0.643569	-0.643569	-0.452186	0.285624	-0.643569	-0.643569	1	Neuro system
KCNH5	ENSMMUG00000023518	0.994236	2.66673	0.545857	1.01214	-0.661232	-0.704049	-0.706461	0.235626	-0.662863	-0.639921	-0.721758	-0.704304	-0.254927	-0.39908	1	Neuro system
GPHB5	ENSMMUG00000059346	-0.4821	2.94591	1.32181	0.497052	0.0562298	-0.4821	-0.4821	-0.4821	-0.4821	-0.4821	-0.4821	-0.4821	-0.4821	-0.4821	1	Neuro system
PPP2R5E	ENSMMUG00000008205	-0.99092	-0.748966	1.26113	1.84966	-0.361162	-0.39434	-0.784792	-0.354569	0.540013	1.28367	-1.18492	0.561864	0.536243	-1.21291	1	Neuro system
SGPP1	ENSMMUG00000023556	-0.507915	0.0065897	0.753173	1.67734	-0.51229	-0.879576	-1.06916	0.228447	0.959734	1.79484	-0.728505	-0.923354	0.401749	-1.20107	1	Neuro system
-	ENSMMUG00000056063	-0.429529	0.211078	-0.260493	3.31411	-0.39837	-0.487498	-0.524362	-0.429462	0.252079	-0.354008	-0.464498	0.347586	-0.252269	-0.524362	1	Neuro system
PLEKHG3	ENSMMUG00000019170	-0.758562	1.36833	0.404166	2.60946	-0.129689	-0.765282	-0.405879	0.257645	0.500238	0.0316066	-0.579134	-0.750485	-0.829305	-0.95311	1	Neuro system
Metazoa_SRP	ENSMMUG00000063184	-0.301081	0.0527875	-0.203866	3.43555	-0.229255	-0.446293	-0.263449	-0.0648423	-0.352431	-0.185441	-0.446293	-0.154227	-0.446293	-0.394867	1	Neuro system
Metazoa_SRP	ENSMMUG00000057186	-0.501779	-0.501779	-0.501779	3.00001	0.460848	-0.501779	-0.501779	0.948373	-0.501779	-0.501779	-0.501779	0.60856	-0.501779	-0.501779	1	Neuro system
-	ENSMMUG00000059475	-0.450736	-0.359236	0.425776	2.34504	-0.722803	-0.546366	-0.143538	-0.525812	2.14565	-0.337391	-0.390719	-0.0668899	-0.525312	-0.847661	1	Neuro system
PLEKHH1	ENSMMUG00000021326	-0.378323	2.28282	1.53312	1.64385	-0.50773	-0.53621	-0.48492	-0.556494	-0.448568	-0.53295	-0.545559	-0.474593	-0.506958	-0.487483	1	Neuro system
Metazoa_SRP	ENSMMUG00000052026	1.12416	0.269002	-0.690523	2.92722	-0.509705	-0.690523	-0.690523	-0.418128	-0.455929	0.28742	-0.346863	0.352301	-0.467381	-0.690523	1	Neuro system
SMOC1	ENSMMUG00000017430	-0.427673	0.933254	0.177878	2.73248	-0.500348	-0.60612	-0.539134	-0.609992	-0.11827	-0.605556	1.32092	-0.637149	-0.62547	-0.494824	1	Neuro system
Metazoa_SRP	ENSMMUG00000055872	1.52287	-0.368298	-0.292536	2.7168	-0.49922	-0.49922	0.914142	-0.49922	-0.49922	-0.49922	-0.49922	-0.49922	-0.49922	-0.49922	1	Neuro system
RGS6	ENSMMUG00000001820	-0.443133	1.78801	1.63646	1.01992	0.336744	0.924041	-0.862717	0.399553	-0.765007	-0.755344	-1.03458	-0.555259	-0.675603	-1.01309	1	Neuro system
Metazoa_SRP	ENSMMUG00000053506	-0.472511	-0.728	-0.109549	2.91569	0.876102	-0.382427	-0.195474	-0.607762	0.0366508	-0.0407587	-0.501306	0.854676	-1.01467	-0.630665	1	Neuro system
PNMA1	ENSMMUG00000004911	0.96375	0.285986	1.55219	2.1203	-0.565264	-0.776864	-0.812464	0.280609	0.396291	0.088251	-1.16474	-0.644167	-0.873916	-0.849964	1	Neuro system
VSX2	ENSMMUG00000029272	-0.609975	0.201585	1.52534	2.86714	-0.609975	-0.311663	-0.223453	-0.417983	-0.444626	-0.609975	-0.609975	0.125037	-0.452698	-0.428789	1	Neuro system
SYNDIG1L	ENSMMUG00000038996	-0.135895	2.25417	1.81086	1.34663	-0.54505	-0.535312	-0.54505	-0.54505	-0.54505	-0.380052	-0.54505	-0.54505	-0.54505	-0.54505	1	Neuro system
PGF	ENSMMUG00000002909	-0.884106	0.502613	-0.589789	2.75852	0.938994	-0.329273	-0.113048	-0.525558	-0.423347	1.02119	-0.750701	-0.394042	-0.771073	-0.440375	1	Neuro system
Metazoa_SRP	ENSMMUG00000050556	2.83569	-0.590106	-0.590106	0.651652	-0.590106	-0.590106	-0.590106	0.952596	-0.590106	-0.590106	-0.590106	0.197362	0.673654	-0.590106	1	Neuro system
Metazoa_SRP	ENSMMUG00000058687	-0.0672785	-0.209826	-0.457295	3.3597	-0.37957	-0.457295	-0.457295	-0.106031	-0.356455	0.243313	-0.457295	0.259911	-0.457295	-0.457295	1	Neuro system
Metazoa_SRP	ENSMMUG00000056065	-0.267261	-0.267261	-0.267261	3.4744	-0.267261	-0.267261	-0.267261	-0.267261	-0.267261	-0.267261	-0.267261	-0.267261	-0.267261	-0.267261	1	Neuro system
VASH1	ENSMMUG00000018553	2.31127	0.820149	0.439252	1.83864	-0.479409	-0.647834	-0.721134	-0.0139671	-0.521599	-0.289456	-0.752846	-0.649605	-0.731712	-0.601745	1	Neuro system
-	ENSMMUG00000046041	0.365701	0.798384	0.1749	2.7683	-0.788831	-0.519557	-0.788831	-0.268923	1.0022	-0.788831	-0.242224	-0.788831	-0.788831	-0.134637	1	Neuro system
Metazoa_SRP	ENSMMUG00000056956	-0.392042	2.56374	-0.392042	2.14076	-0.392042	-0.392042	-0.392042	-0.392042	-0.392042	-0.392042	-0.392042	-0.392042	-0.392042	-0.392042	1	Neuro system
NGB	ENSMMUG00000048130	0.296618	0.880438	-0.10152	3.20519	-0.452138	-0.44149	-0.44294	-0.452138	-0.428529	-0.452138	-0.452138	-0.41016	-0.452138	-0.296918	1	Neuro system
ISM2	ENSMMUG00000013555	-0.134412	-0.119223	-0.178056	3.43052	-0.398502	-0.398502	-0.398502	-0.398502	-0.398502	0.0758981	-0.398502	-0.398502	-0.0737632	-0.21145	1	Neuro system
Metazoa_SRP	ENSMMUG00000058077	-0.616865	-0.616865	-0.616865	2.31384	1.80005	0.326008	0.197587	-0.616865	-0.616865	-0.616865	0.91431	-0.616865	-0.616865	-0.616865	1	Neuro system
Metazoa_SRP	ENSMMUG00000050250	2.3256	-0.257845	-0.440681	2.37941	-0.440681	-0.239061	-0.440681	-0.440681	-0.440681	-0.440681	-0.440681	-0.241973	-0.440681	-0.440681	1	Neuro system
-	ENSMMUG00000055719	0.133692	0.0904627	0.342766	3.34976	-0.365171	-0.373083	-0.464227	-0.451922	-0.29603	-0.444563	-0.48933	-0.145625	-0.397398	-0.48933	1	Neuro system
-	ENSMMUG00000061233	0.520593	-0.303559	-0.0542236	3.292	-0.274156	-0.436442	-0.552732	-0.389541	-0.298018	-0.348187	-0.555553	0.312323	-0.312747	-0.599755	1	Neuro system
CHGA	ENSMMUG00000009971	1.6025	0.181921	-0.332782	2.6748	-0.58741	-0.587026	-0.593884	-0.582678	-0.585268	-0.58812	-0.594612	-0.0214597	0.602484	-0.588469	1	Neuro system
ITPK1	ENSMMUG00000009974	0.272223	0.800578	0.686438	1.95971	-0.36776	-0.970508	-1.12272	0.352173	-0.86581	-0.193885	-0.978506	1.57837	-0.0210071	-1.12929	1	Neuro system
-	ENSMMUG00000053729	0.409706	-0.662537	0.386201	2.25559	-0.88536	-0.470575	-0.694334	-0.698525	0.578501	1.70229	-0.532661	0.305789	-0.585943	-1.10814	1	Neuro system
PRIMA1	ENSMMUG00000042148	-0.708817	2.4321	0.0203645	1.58078	-0.365483	-0.498277	-0.637788	-0.283668	-0.641484	-0.648891	-0.789718	0.923065	0.454216	-0.836389	1	Neuro system
IFI27L1	ENSMMUG00000002383	-0.393535	0.0983807	-1.03865	2.07917	0.246965	0.465962	-0.38881	0.898068	1.74127	-0.266079	-0.631415	-1.03865	-1.03865	-0.734031	1	Neuro system
-	ENSMMUG00000038389	-0.124675	2.99366	-0.0772882	1.39244	-0.544092	-0.544092	-0.544092	-0.469143	-0.0535265	-0.113565	-0.52518	-0.314547	-0.531812	-0.544092	1	Neuro system
Y_RNA	ENSMMUG00000050218	-0.633967	-0.633967	2.03657	2.26514	-0.633967	-0.633967	-0.633967	0.166414	0.0553421	-0.633967	-0.129078	-0.633967	0.677354	-0.633967	1	Neuro system
HHIPL1	ENSMMUG00000000098	0.375979	0.859067	0.344776	2.14809	-0.721746	-0.847564	-0.82059	0.117345	-0.754777	1.81682	-0.672489	-0.572768	-0.613261	-0.658884	1	Neuro system
CYP46A1	ENSMMUG00000000100	2.7193	0.700851	0.782295	1.22871	-0.509589	-0.499622	-0.630458	-0.463686	-0.421732	-0.55122	-0.591002	-0.559293	-0.62915	-0.575406	1	Neuro system
EML1	ENSMMUG00000011706	-1.29571	-0.324485	-0.631283	1.92764	-0.0561951	-0.631956	0.44619	1.40177	-0.88911	-0.625646	1.35241	0.365397	0.13266	-1.17169	1	Neuro system
Metazoa_SRP	ENSMMUG00000049437	-0.778389	0.197599	1.27597	2.5669	-0.318586	0.297867	-0.4685	1.06874	-0.57954	-0.502077	-0.778389	-0.424817	-0.778389	-0.778389	1	Neuro system
Metazoa_SRP	ENSMMUG00000051100	-0.755749	-0.536424	-0.755749	2.62716	-0.755749	0.21168	-0.755749	1.11215	0.0485913	-0.0106328	-0.362986	1.15117	-0.755749	-0.461956	1	Neuro system
Metazoa_SRP	ENSMMUG00000059989	-0.466871	0.0358683	-0.39238	2.06024	0.406705	-1.12618	-0.683421	0.523262	0.578473	1.63731	-0.709985	0.389335	-1.12618	-1.12618	1	Neuro system
Metazoa_SRP	ENSMMUG00000063938	-0.479094	1.35034	-0.479094	2.65618	-0.479094	-0.479094	1.26351	-0.479094	-0.479094	-0.479094	-0.479094	-0.479094	-0.479094	-0.479094	1	Neuro system
DLK1	ENSMMUG00000020038	-0.790541	1.50702	-0.60587	1.49775	0.646775	2.04617	-0.53205	-0.787684	-0.486672	-0.673338	-0.167288	-0.796243	-0.792737	-0.0653005	1	Neuro system
mml-mir-770	ENSMMUG00000032674	0.40423	1.09767	1.97759	2.10471	-0.562651	-0.626448	-0.636646	-0.212267	-0.469105	-0.559344	-0.668545	-0.654203	-0.667434	-0.527562	1	Neuro system
mml-mir-758	ENSMMUG00000032999	-1.27356	2.15374	0.0790919	0.929076	0.74476	0.143718	-0.0493188	-0.665459	-0.749847	0.909621	-0.122769	-1.27356	-1.27356	0.448062	1	Neuro system
mml-mir-1185-1	ENSMMUG00000054989	-0.679986	0.150695	-0.024297	2.87906	-0.288639	-0.679986	-0.284357	1.08865	-0.172253	0.731057	-0.679986	-0.679986	-0.679986	-0.679986	1	Neuro system
mml-mir-496	ENSMMUG00000032717	-0.676137	2.75963	0.408656	0.501503	-0.676137	-0.676137	-0.676137	-0.676137	1.00388	0.491101	-0.676137	-0.676137	-0.676137	0.244328	1	Neuro system
Metazoa_SRP	ENSMMUG00000060616	-0.791839	1.55462	0.347948	2.61085	-0.281629	-0.393758	0.067814	-0.791839	0.532051	-0.485236	-0.791839	-0.20334	-0.581962	-0.791839	1	Neuro system
TECPR2	ENSMMUG00000003484	-0.582835	2.05871	1.62574	1.63289	-0.437457	-0.588302	-0.49269	-0.216052	-0.544789	0.228881	-0.647039	-0.412798	-0.692833	-0.931415	1	Neuro system
-	ENSMMUG00000057818	-0.528638	1.41528	0.188791	1.24178	-0.710941	-0.723276	-0.568126	2.4727	-0.144532	-0.14628	-0.737222	-0.567146	-0.76345	-0.428944	1	Neuro system
Metazoa_SRP	ENSMMUG00000039908	0.682203	0.761133	1.60094	1.79704	-0.690127	-0.690127	-0.690127	1.36983	-0.690127	-0.690127	-0.690127	-0.690127	-0.690127	-0.690127	1	Neuro system
-	ENSMMUG00000019552	-0.00711977	-0.0945176	-0.923553	2.64343	-0.0123301	-0.331381	0.329693	0.965909	0.628692	-0.882473	0.375359	-1.27802	-0.866893	-0.546791	1	Neuro system
Metazoa_SRP	ENSMMUG00000056923	-0.512843	0.812059	0.605813	2.64819	0.0127229	-0.659799	-0.155201	-0.600775	1.18519	-0.865322	-0.698443	-0.257656	-0.648609	-0.865322	1	Neuro system
-	ENSMMUG00000051448	-1.18358	-0.638362	1.74288	1.99335	0.0493511	0.980851	-0.56037	-0.254904	-0.91698	-0.0722135	-0.695397	0.831089	-0.676408	-0.59931	1	Neuro system
CKB	ENSMMUG00000049145	0.489896	0.595993	2.34992	1.69442	-0.393732	-0.622419	-0.827264	-0.802538	-0.430868	-0.758716	-0.81036	0.350272	-0.062474	-0.772129	1	Neuro system
TMEM179	ENSMMUG00000029177	0.360201	0.906116	2.04688	2.19344	-0.471503	-0.550962	-0.574034	-0.553692	-0.577344	-0.482509	-0.589772	-0.539422	-0.587628	-0.579764	1	Neuro system
INF2	ENSMMUG00000016552	-0.403988	2.13779	-0.653161	1.64468	-0.48593	-0.809201	-0.701107	0.884653	-0.451692	1.0226	-0.636082	-0.521548	-0.00545248	-1.02156	1	Neuro system
CEP170B	ENSMMUG00000010576	0.384525	0.0395317	2.03733	1.88034	-0.683293	-0.984282	-0.759631	0.0770717	-0.662374	-0.777552	-0.965893	0.964066	-0.0643855	-0.485453	1	Neuro system
JAG2	ENSMMUG00000001276	0.271904	0.605097	1.98296	1.55788	0.567631	-0.584983	-0.361084	0.551184	-0.49738	0.232672	-1.33178	-0.839136	-1.09983	-1.05512	1	Neuro system
BRF1	ENSMMUG00000029174	-0.727209	0.778706	1.67692	2.21713	-0.413258	-0.862492	-0.326423	0.569285	-0.58921	0.536348	-0.829192	-0.434595	-0.73939	-0.856617	1	Neuro system
Metazoa_SRP	ENSMMUG00000065019	-0.343643	0.0941823	-0.343643	3.40807	-0.343643	-0.343643	-0.343643	0.277818	-0.343643	-0.343643	-0.343643	-0.343643	-0.343643	-0.343643	1	Neuro system
PACS2	ENSMMUG00000022939	-0.246619	1.7877	1.31821	2.19554	-0.549413	-0.70229	-0.0209193	-0.27924	-0.702243	-0.36246	-0.740993	-0.330417	-0.465675	-0.901183	1	Neuro system
TEX22	ENSMMUG00000060690	-0.770512	0.0378984	1.38983	2.4562	-0.457079	-0.540645	-0.172503	-0.75058	-0.842653	1.22073	-0.598433	0.222715	-0.707104	-0.487868	1	Neuro system
TEDC1	ENSMMUG00000007159	-0.531599	0.18943	0.243277	2.59991	-0.36776	-0.841652	-0.818251	0.464825	-0.623243	1.56629	-0.849657	-0.0293194	-0.318303	-0.683947	1	Neuro system
-	ENSMMUG00000061736	-0.00280263	0.0283136	0.103327	1.83959	-0.496359	-0.457554	-0.630242	2.67279	-0.43884	-0.42674	-0.625212	-0.4974	-0.642654	-0.426224	1	Neuro system
-	ENSMMUG00000060109	-0.242641	0.0423127	1.45842	1.27869	0.856787	1.96911	-0.90495	-0.463479	-0.555681	0.0647745	-0.918325	-0.873525	-0.583613	-1.12788	1	Neuro system
Metazoa_SRP	ENSMMUG00000060730	0.925889	-0.0068111	1.81974	1.47765	0.0879662	-0.268724	-1.24032	0.760678	-1.0249	0.555658	-0.924753	-0.0912396	-0.830519	-1.24032	1	Neuro system
-	ENSMMUG00000018687	-1.04566	0.676353	-0.901092	2.09978	0.543209	-0.419495	0.0350494	1.81429	-0.955533	0.0183094	-0.683308	0.0111067	-0.165126	-1.02788	1	Neuro system
GYG2	ENSMMUG00000003932	-0.508403	0.756714	-0.290149	2.79866	-0.788086	-0.797451	-0.716605	-0.141277	-0.170295	-0.662489	0.925809	-0.344051	0.681704	-0.744078	1	Neuro system
Metazoa_SRP	ENSMMUG00000059720	2.08988	-0.391373	-0.391373	2.60659	-0.391373	-0.391373	-0.391373	-0.391373	-0.391373	-0.391373	-0.391373	-0.391373	-0.391373	-0.391373	1	Neuro system
Metazoa_SRP	ENSMMUG00000059390	-0.607377	0.414619	-0.607377	2.89561	-0.607377	-0.607377	-0.607377	0.117948	-0.607377	-0.607377	0.307709	-0.0520177	1.17515	-0.607377	1	Neuro system
ARSL	ENSMMUG00000004985	-0.147761	2.4558	-0.213108	1.83594	0.381974	-0.159335	-0.949179	-0.205636	-0.226435	-0.503595	-1.08699	-0.634733	0.161104	-0.708051	1	Neuro system
-	ENSMMUG00000051504	-0.252195	-0.310966	1.86955	2.09351	-0.500562	-0.650958	-0.497864	1.48176	-0.53387	-0.302593	-0.590934	-0.747159	-0.544281	-0.513441	1	Neuro system
-	ENSMMUG00000051223	-0.455755	-0.114366	0.30837	3.31537	-0.288971	-0.406866	-0.222111	-0.22461	0.428392	-0.263346	-0.443684	-0.530307	-0.499441	-0.602676	1	Neuro system
-	ENSMMUG00000061895	-0.49593	-0.612427	0.537644	3.16497	-0.30059	-0.123288	-0.294133	-0.890847	0.130216	-0.299671	0.23098	0.16822	-0.324302	-0.890847	1	Neuro system
-	ENSMMUG00000056503	2.14968	-0.411045	0.0110919	2.45339	-0.574246	-0.549482	-0.278724	-0.50062	0.0348153	-0.195456	-0.443325	-0.496044	-0.480418	-0.71962	1	Neuro system
ANOS1	ENSMMUG00000018191	0.15216	0.469096	0.348778	2.47349	-0.321439	-0.378542	-0.397943	1.7881	-0.652024	-0.772285	-0.78505	-0.771462	-0.669102	-0.48377	1	Neuro system
GPR143	ENSMMUG00000006192	0.250036	1.9937	0.874148	2.21418	-0.682205	-0.526899	-0.682205	-0.682205	-0.165707	-0.682205	-0.429996	-0.682205	-0.682205	-0.116237	1	Neuro system
-	ENSMMUG00000061144	-0.343644	-0.300419	-0.0546178	3.42907	-0.298086	-0.189977	-0.400891	-0.372417	0.152346	-0.31395	-0.426218	-0.246885	-0.17533	-0.458982	1	Neuro system
-	ENSMMUG00000051459	0.675309	-0.359294	0.0341654	2.45655	-0.291798	1.58501	-0.931279	-0.556668	-0.0695154	-0.461739	-0.836289	0.438688	-0.643921	-1.03922	1	Neuro system
-	ENSMMUG00000054969	-0.0268687	-0.172936	1.03526	3.10619	-0.381184	-0.321259	-0.732975	-0.203019	-0.0483568	-0.0987656	-0.565824	-0.124318	-0.732975	-0.732975	1	Neuro system
-	ENSMMUG00000051616	1.37535	-0.91576	0.735694	1.67312	-0.288329	-0.830011	0.314582	-0.177442	1.62768	0.0123767	-1.04091	-0.465118	-0.878875	-1.14236	1	Neuro system
U6	ENSMMUG00000060710	-0.412558	1.13527	-0.412558	3.12431	-0.412558	-0.412558	-0.412558	-0.412558	-0.412558	-0.412558	-0.412558	-0.412558	-0.412558	0.278563	1	Neuro system
Y_RNA	ENSMMUG00000032761	3.04491	1.43413	-0.373253	-0.373253	-0.373253	-0.373253	-0.373253	-0.373253	-0.373253	-0.373253	-0.373253	-0.373253	-0.373253	-0.373253	1	Neuro system
-	ENSMMUG00000063578	0.0406959	-0.371352	0.916194	3.12307	0.0855803	-0.395837	-0.577518	-0.530505	-0.427247	0.267309	-0.493112	-0.29041	-0.673432	-0.673432	1	Neuro system
GPM6B	ENSMMUG00000019415	0.497167	2.76866	1.44897	0.427734	-0.458847	-0.389311	-0.631903	-0.528717	-0.47193	-0.575959	-0.663462	-0.490877	-0.248456	-0.683072	1	Neuro system
Metazoa_SRP	ENSMMUG00000064091	-0.582766	1.25106	1.63374	1.84448	-0.0937679	0.604729	-0.333347	0.64737	-0.828584	-0.828584	-0.828584	-0.828584	-0.828584	-0.828584	1	Neuro system
Metazoa_SRP	ENSMMUG00000063934	-0.547022	-0.211065	-0.547022	3.19543	-0.388748	0.00868486	0.893033	-0.0701561	0.0690126	-0.547022	-0.396616	-0.364461	-0.547022	-0.547022	1	Neuro system
Metazoa_SRP	ENSMMUG00000053952	-0.493938	0.992678	1.07065	2.90307	-0.0270257	-0.493938	-0.493938	-0.493938	-0.493938	-0.493938	-0.493938	-0.493938	-0.493938	-0.493938	1	Neuro system
RS1	ENSMMUG00000005065	2.89526	0.781317	-0.607939	-0.607939	-0.607939	-0.607939	0.715383	0.706693	-0.041841	-0.607939	-0.193297	-0.607939	-0.607939	-0.607939	1	Neuro system
Metazoa_SRP	ENSMMUG00000048967	-0.587993	-0.587993	-0.587993	2.18784	0.938135	-0.587993	-0.587993	-0.587993	-0.587993	-0.587993	-0.587993	1.17231	-0.587993	1.58165	1	Neuro system
-	ENSMMUG00000056089	0.00470645	-0.363036	0.0897921	1.81296	1.57505	0.306199	-1.13831	0.441508	-0.217842	-0.850109	-1.35874	1.2793	-0.83878	-0.742695	1	Neuro system
Metazoa_SRP	ENSMMUG00000057198	-0.487585	1.05944	-0.487585	2.16371	-0.487585	-0.487585	-0.487585	-0.487585	-0.487585	2.14029	-0.487585	-0.487585	-0.487585	-0.487585	1	Neuro system
Metazoa_SRP	ENSMMUG00000061261	-0.338493	0.731817	-0.338493	3.33009	-0.338493	-0.338493	-0.338493	-0.338493	-0.338493	-0.338493	-0.338493	-0.338493	-0.338493	-0.338493	1	Neuro system
PCYT1B	ENSMMUG00000012821	0.390014	2.62088	1.52504	0.643409	-0.61942	-0.628815	-0.676853	-0.0498288	-0.65473	-0.580812	-0.696278	-0.541139	-0.672566	-0.0588978	1	Neuro system
Metazoa_SRP	ENSMMUG00000057688	-0.197336	0.199149	0.627273	1.36136	0.105089	0.00732634	-1.42906	1.80651	-0.632899	0.783555	-0.845906	0.694409	-1.05041	-1.42906	1	Neuro system
ARX	ENSMMUG00000055034	2.03482	-0.501038	-0.513067	-0.368764	-0.513067	-0.513067	0.942077	-0.495993	-0.513067	-0.492634	-0.513067	-0.460775	-0.41516	2.3228	1	Neuro system
-	ENSMMUG00000057867	-0.116762	0.706649	0.344061	3.25485	-0.402131	-0.449494	-0.449494	-0.306793	-0.388045	-0.449494	-0.449494	-0.394863	-0.449494	-0.449494	1	Neuro system
CXHXorf21	ENSMMUG00000012710	0.698966	-0.403204	-0.5017	1.83107	-0.541727	-0.651048	-0.688703	1.03087	-0.441983	2.16411	-0.492219	-0.539285	-0.683304	-0.781844	1	Neuro system
-	ENSMMUG00000058346	-0.267586	-0.575375	0.483648	3.062	-0.214657	-0.12766	0.473768	-0.35126	-0.674245	0.503894	-0.365472	-0.14184	-0.695502	-1.10971	1	Neuro system
-	ENSMMUG00000062693	1.77	-0.113529	0.551251	2.5601	-0.324622	-0.148906	-0.671267	-0.628208	0.0300809	-0.289131	-0.759117	-0.458417	-0.759117	-0.759117	1	Neuro system
Metazoa_SRP	ENSMMUG00000058394	-0.466947	-0.0797898	1.54737	1.75873	0.21168	-0.922078	-0.922078	1.81065	0.107576	-0.104501	-0.706599	-0.529759	-0.782165	-0.922078	1	Neuro system
Metazoa_SRP	ENSMMUG00000059712	0.100374	2.03942	-0.79215	0.82543	0.0971825	-0.79215	-0.79215	1.88732	0.361668	-0.79215	-0.79215	0.233647	-0.79215	-0.79215	1	Neuro system
MID1IP1	ENSMMUG00000003201	1.9843	0.556321	-0.329827	2.12897	-0.812573	-0.845504	0.739773	-0.122444	-0.526865	-0.629159	-0.574221	-0.655312	-0.0539234	-0.859546	1	Neuro system
Metazoa_SRP	ENSMMUG00000050198	-0.267261	-0.267261	-0.267261	3.4744	-0.267261	-0.267261	-0.267261	-0.267261	-0.267261	-0.267261	-0.267261	-0.267261	-0.267261	-0.267261	1	Neuro system
-	ENSMMUG00000063543	-1.02808	0.689885	0.0341045	1.87499	0.180311	-0.701372	-1.11744	0.843061	1.70091	0.164556	0.0877131	-0.715537	-0.992759	-1.02033	1	Neuro system
Metazoa_SRP	ENSMMUG00000051947	-0.386627	0.329271	-0.386627	3.29408	-0.386627	-0.386627	-0.386627	0.629538	-0.386627	-0.386627	-0.386627	-0.386627	-0.386627	-0.386627	1	Neuro system
Metazoa_SRP	ENSMMUG00000053371	-0.267261	-0.267261	-0.267261	3.4744	-0.267261	-0.267261	-0.267261	-0.267261	-0.267261	-0.267261	-0.267261	-0.267261	-0.267261	-0.267261	1	Neuro system
-	ENSMMUG00000051500	1.71937	-0.527035	1.7236	1.48369	-0.542382	-0.792689	-0.792689	0.715615	-0.792689	0.10982	-0.792689	0.0734585	-0.792689	-0.792689	1	Neuro system
Metazoa_SRP	ENSMMUG00000059628	-0.683945	-0.683945	1.51129	1.69918	0.62628	-0.683945	0.640614	-0.683945	-0.683945	1.67813	-0.683945	-0.683945	-0.683945	-0.683945	1	Neuro system
ZNF674	ENSMMUG00000002292	-0.949801	-0.111987	0.536432	2.07183	-0.0911202	-0.762212	-0.801509	-0.41547	-0.351328	1.33026	-0.531167	1.47501	-0.0783849	-1.32055	1	Neuro system
Metazoa_SRP	ENSMMUG00000059715	1.90535	-0.562808	0.810701	2.41933	-0.562808	-0.562808	-0.562808	-0.562808	-0.562808	-0.562808	-0.562808	-0.0900235	-0.562808	0.0199152	1	Neuro system
Metazoa_SRP	ENSMMUG00000058454	-0.723252	-0.44841	-0.281369	2.61802	0.472616	0.457507	-0.720612	0.719773	-0.773051	0.858728	-1.08369	0.435254	-0.788214	-0.743298	1	Neuro system
-	ENSMMUG00000057508	-0.289876	-0.899134	1.12217	2.48162	-0.293652	1.11694	-0.707602	0.239207	-0.526766	0.55101	-0.545924	-0.374923	-0.826429	-1.04664	1	Neuro system
Metazoa_SRP	ENSMMUG00000060865	0.217406	-0.794536	-0.231399	2.87348	-0.458428	-0.00781266	-0.794536	-0.794536	0.949724	-0.1886	-0.794536	0.36851	0.449799	-0.794536	1	Neuro system
PCSK1N	ENSMMUG00000016469	0.429119	0.255905	0.270292	3.29674	-0.430561	-0.431496	-0.433204	-0.4317	-0.404031	-0.429743	-0.43356	-0.418297	-0.422456	-0.417006	1	Neuro system
PRAF2	ENSMMUG00000055688	0.0887921	1.64008	1.45572	2.13846	-0.588377	-0.798066	-0.795622	-0.0354548	-0.490928	-0.21487	-0.818043	-0.167789	-0.640979	-0.772916	1	Neuro system
PPP1R3F	ENSMMUG00000052252	0.346332	0.809861	1.84695	2.34682	-0.119528	-0.442782	-0.438294	-0.487683	-0.604841	-0.305618	-0.812855	-0.710576	-0.816193	-0.611597	1	Neuro system
DGKK	ENSMMUG00000016492	-0.396123	3.30433	0.0804231	0.0911573	-0.413527	-0.413527	-0.413527	-0.413527	-0.413527	-0.413527	-0.413527	-0.393524	-0.413527	0.621959	1	Neuro system
-	ENSMMUG00000049267	-0.0884407	-0.100011	-0.229789	3.41557	-0.325192	-0.448066	-0.434702	-0.135455	0.164743	-0.15522	-0.376953	-0.375925	-0.466432	-0.444122	1	Neuro system
NUDT10	ENSMMUG00000046256	2.27558	1.03723	-0.853894	1.57686	-0.705404	-0.853894	-0.553666	0.711954	-0.468594	-0.050801	-0.712786	-0.511344	-0.670648	-0.220588	1	Neuro system
EZHIP	ENSMMUG00000063652	-0.47569	0.741352	-0.232186	0.740975	-0.579798	-0.336985	-0.579798	-0.267252	-0.310625	-0.579798	-0.579798	-0.579798	-0.0677314	3.10713	1	Neuro system
-	ENSMMUG00000055152	-0.267261	3.4744	-0.267261	-0.267261	-0.267261	-0.267261	-0.267261	-0.267261	-0.267261	-0.267261	-0.267261	-0.267261	-0.267261	-0.267261	1	Neuro system
-	ENSMMUG00000032454	-0.412473	-0.0827125	-0.412473	1.65972	-0.412473	-0.412473	-0.412473	-0.412473	-0.412473	-0.412473	-0.412473	-0.352742	-0.412473	2.90047	1	Neuro system
-	ENSMMUG00000050420	-0.584754	0.482905	-0.584754	2.81335	-0.584754	-0.584754	-0.584754	-0.368259	1.46621	-0.584754	-0.584754	0.0783007	-0.407405	0.0281745	1	Neuro system
-	ENSMMUG00000020202	1.88752	1.02056	0.833627	2.05384	-0.548079	-0.562663	-0.59185	-0.432165	-0.658177	-0.611907	-0.776953	-0.407361	-0.494507	-0.711877	1	Neuro system
-	ENSMMUG00000054354	0.899103	0.324067	-0.674221	2.7475	-0.674221	-0.674221	-0.357251	1.21511	-0.267436	-0.674221	-0.674221	-0.674221	-0.287293	-0.228474	1	Neuro system
TSR2	ENSMMUG00000012612	1.8788	0.754132	1.03563	0.979381	0.0751125	-0.556849	-1.14182	0.754905	0.306088	-0.357303	-0.950841	-0.215101	-0.944659	-1.61747	1	Neuro system
Metazoa_SRP	ENSMMUG00000062906	2.33312	0.227621	0.66551	2.06459	-0.529084	-0.529084	-0.529084	-0.529084	-0.529084	-0.529084	-0.529084	-0.529084	-0.529084	-0.529084	1	Neuro system
-	ENSMMUG00000053644	-0.354566	-0.340064	-0.185765	3.23183	-0.606705	-0.312671	-0.606705	-0.00114122	0.827496	-0.334946	-0.320207	0.0308305	-0.420679	-0.606705	1	Neuro system
-	ENSMMUG00000062445	0.0855524	-0.394322	-0.0131847	3.04155	-0.266239	-0.472914	-0.512623	-0.239078	1.23934	-0.405181	-0.717112	-0.247257	-0.334074	-0.764457	1	Neuro system
-	ENSMMUG00000062132	1.23998	-0.271229	0.258134	3.03066	-0.111281	-0.471499	-0.427815	-0.486542	-0.0668923	-0.452776	-0.59322	-0.44791	-0.57382	-0.625788	1	Neuro system
-	ENSMMUG00000063731	0.229422	-0.407015	0.216371	3.37712	-0.199219	-0.198279	-0.411307	-0.304904	-0.386899	-0.113413	-0.456962	-0.350023	-0.497448	-0.497448	1	Neuro system
-	ENSMMUG00000051670	-0.695015	-0.350142	0.591783	3.12159	-0.341434	0.0278493	-0.448978	0.0257295	0.509456	0.0625514	-0.738384	-0.32871	-0.59165	-0.844651	1	Neuro system
-	ENSMMUG00000058922	0.709447	-0.23939	0.0677934	3.29432	-0.400982	-0.38115	-0.340859	-0.254323	-0.40412	-0.150096	-0.489748	-0.483835	-0.40965	-0.517407	1	Neuro system
-	ENSMMUG00000054377	2.64558	-0.434269	0.484283	1.83032	-0.56752	-0.494049	-0.56752	-0.47295	-0.160288	-0.56752	-0.448208	-0.422701	-0.257638	-0.56752	1	Neuro system
-	ENSMMUG00000051079	0.752734	-0.210748	0.408093	3.21563	-0.374507	-0.501376	-0.518354	-0.4565	-0.375886	-0.141116	-0.520228	-0.270426	-0.479687	-0.527627	1	Neuro system
-	ENSMMUG00000062918	-0.143783	-0.215217	1.69347	2.85774	-0.323459	-0.494106	-0.501209	-0.546255	-0.315011	-0.305261	-0.546255	-0.186479	-0.491266	-0.482907	1	Neuro system
-	ENSMMUG00000049709	0.335266	-0.411653	0.0577884	3.36014	-0.167078	-0.305175	-0.457913	-0.311918	0.0938932	-0.424962	-0.460437	-0.307988	-0.499982	-0.499982	1	Neuro system
-	ENSMMUG00000064674	3.16154	-0.528373	-0.402655	0.904655	-0.453338	-0.440557	-0.376661	-0.358818	0.493804	-0.325463	-0.314459	-0.441824	-0.389476	-0.528373	1	Neuro system
-	ENSMMUG00000059664	-0.0105968	-0.246503	0.765819	3.18836	-0.207985	-0.166009	-0.387074	-0.0445603	0.181749	-0.562659	-0.714696	-0.54456	-0.514733	-0.736547	1	Neuro system
FAM155B	ENSMMUG00000006416	0.163191	0.279446	2.4128	1.91528	-0.273618	-0.970831	-0.679173	-0.572434	-0.721297	-0.364033	-0.696671	-0.471674	0.334613	-0.355602	1	Neuro system
FOXO4	ENSMMUG00000032429	2.92888	0.232273	-0.427915	0.1666	-0.0242816	-0.354103	-0.0386075	1.04774	-0.549364	-0.0545336	-1.0853	-0.190199	-0.668119	-0.983067	1	Neuro system
NLGN3	ENSMMUG00000032427	0.438881	1.45377	2.20792	1.48676	-0.65436	-0.697857	-0.724203	-0.546787	-0.651874	0.0539889	-0.715807	-0.554234	-0.652194	-0.444012	1	Neuro system
-	ENSMMUG00000054587	-0.270259	0.518801	-0.409165	2.44365	-0.692021	-0.130599	-0.969664	-0.690219	-0.205288	0.399093	-0.447545	1.7873	-0.421747	-0.912333	1	Neuro system
Metazoa_SRP	ENSMMUG00000057679	1.39207	-0.445004	-0.217544	1.85648	-0.467711	-0.838073	-0.838073	-0.280141	-0.838073	1.83268	-0.838073	0.443503	0.0760269	-0.838073	1	Neuro system
Metazoa_SRP	ENSMMUG00000055462	-0.553979	1.0498	1.97788	2.19458	-0.553979	-0.553979	-0.553979	-0.553979	-0.553979	-0.553979	-0.553979	0.317527	-0.553979	-0.553979	1	Neuro system
-	ENSMMUG00000055457	-0.547404	-0.343017	0.0860006	1.82468	0.419443	-0.179382	-0.764076	0.675495	0.935191	1.4958	-0.424993	-0.771307	-0.423906	-1.98252	1	Neuro system
-	ENSMMUG00000057710	3.42692	-0.208129	-0.00339465	0.203536	-0.350328	-0.350328	-0.350328	-0.331979	-0.350328	-0.350328	-0.350328	-0.336279	-0.350328	-0.298379	1	Neuro system
-	ENSMMUG00000039929	0.3085	1.36856	2.2573	1.66695	-0.575151	-0.575151	-0.575151	-0.575151	-0.575151	-0.575151	-0.575151	-0.575151	-0.575151	-0.42494	1	Neuro system
MAGT1	ENSMMUG00000014407	-0.267318	-0.594571	-0.96663	2.89938	-0.385442	-0.353423	-0.850979	0.225393	0.965696	-0.291929	0.012582	0.175765	0.41409	-0.982611	1	Neuro system
-	ENSMMUG00000056870	-0.313578	1.07357	1.57214	2.3793	-0.0538291	-0.6039	-0.679295	-0.603266	-0.134711	0.0742145	-0.0587519	-0.91498	-1.02774	-0.709171	1	Neuro system
-	ENSMMUG00000063550	0.824963	-0.581033	-0.386577	3.07099	-0.357275	-0.340203	-0.685664	-0.426346	0.257127	-0.441454	-0.37833	0.630492	-0.606588	-0.580103	1	Neuro system
HMGN5	ENSMMUG00000049618	-0.514579	0.355942	-0.456303	1.08498	-0.523463	-0.57613	-0.730078	-0.0535355	-0.0410862	-0.281733	-0.632177	-0.238151	-0.450047	3.05636	1	Neuro system
POU3F4	ENSMMUG00000003112	0.275249	2.44096	0.925046	1.45464	-0.695358	-0.695358	-0.695358	-0.695358	0.141148	-0.695358	0.325816	-0.695358	-0.695358	-0.695358	1	Neuro system
-	ENSMMUG00000061274	0.522706	-0.221069	-0.31897	3.19693	-0.521595	0.595391	-0.132456	-0.685802	0.0243379	-0.389769	-0.477743	-0.433263	-0.550707	-0.607987	1	Neuro system
-	ENSMMUG00000052264	-0.328905	-0.233747	0.558804	3.33293	-0.390134	-0.396575	-0.45034	-0.338941	0.164497	-0.27254	-0.41437	-0.397941	-0.341526	-0.491215	1	Neuro system
Metazoa_SRP	ENSMMUG00000062135	0.422549	0.498136	-0.891652	1.49016	-0.891652	0.640916	1.756	1.08105	-0.891652	-0.891652	0.352751	-0.891652	-0.891652	-0.891652	1	Neuro system
Metazoa_SRP	ENSMMUG00000057147	-0.322494	-0.322494	-0.322494	3.39507	-0.322494	0.474856	-0.322494	-0.322494	-0.322494	-0.322494	-0.322494	-0.322494	-0.322494	-0.322494	1	Neuro system
-	ENSMMUG00000063395	-0.372454	2.48438	0.118542	2.16903	-0.494945	-0.423523	-0.371556	-0.494945	-0.336593	-0.384926	-0.494945	-0.494945	-0.494945	-0.408186	1	Neuro system
PCDH19	ENSMMUG00000011078	1.44339	2.63275	0.328532	0.84139	-0.118784	-0.243233	-0.384794	-0.760656	-0.518002	-0.659191	-0.781015	-0.59395	-0.597554	-0.588878	1	Neuro system
Metazoa_SRP	ENSMMUG00000064153	1.02273	-0.00596942	0.167663	2.29745	-0.267687	-0.29484	-0.81105	-0.814697	-0.891264	0.614393	-0.67035	1.37948	-1.14045	-0.58541	1	Neuro system
DRP2	ENSMMUG00000021579	-0.148001	3.4722	-0.253214	-0.2644	-0.283344	-0.283236	-0.277576	-0.283977	-0.283977	-0.283977	-0.283977	-0.270102	-0.276945	-0.279476	1	Neuro system
-	ENSMMUG00000063530	-0.829005	1.13206	0.718941	1.69165	-0.829005	-0.288371	-0.829005	-0.133107	-0.829005	0.00379062	-0.829005	-0.829005	2.02134	-0.172276	1	Neuro system
TCEAL2	ENSMMUG00000018770	0.745707	0.704591	2.31029	1.84352	-0.617095	-0.624071	-0.633911	-0.570581	-0.557552	-0.603595	-0.625921	-0.410857	-0.571656	-0.388872	1	Neuro system
BEX5	ENSMMUG00000018769	-0.625063	0.531783	1.20122	2.34883	-0.625063	-0.625063	-0.625063	-0.625063	1.49621	-0.625063	-0.625063	-0.625063	0.0475125	-0.625063	1	Neuro system
Metazoa_SRP	ENSMMUG00000058112	-0.81212	-0.58707	0.964282	2.27339	0.248123	-0.81212	-0.81212	-0.81212	0.0132138	0.334726	-0.610613	1.63375	-0.81212	-0.209197	1	Neuro system
-	ENSMMUG00000049154	0.671763	0.725102	1.7183	1.91954	-0.570307	-0.731218	-1.13859	0.532026	0.486501	-0.531006	-0.896996	-0.848489	-0.73869	-0.597938	1	Neuro system
TCEAL4	ENSMMUG00000003502	-0.525799	1.70115	0.841589	0.626177	-0.639616	-0.980332	-1.32184	1.77836	-0.246718	0.86704	-0.605904	-0.215617	-0.188837	-1.08966	1	Neuro system
-	ENSMMUG00000003501	0.362535	0.933963	1.56799	2.51783	-0.646122	-0.682251	-0.675448	-0.434777	-0.563206	-0.0961297	-0.726395	-0.461139	-0.57819	-0.518652	1	Neuro system
PLP1	ENSMMUG00000000809	-0.0529067	3.21033	0.738276	0.480021	-0.427221	-0.432109	-0.445737	-0.444346	-0.442382	-0.445755	-0.447031	-0.421583	-0.426791	-0.442763	1	Neuro system
ESX1	ENSMMUG00000063653	-0.361469	0.338972	-0.361469	3.37315	-0.361469	-0.361469	-0.361469	-0.361469	-0.361469	-0.361469	-0.361469	-0.361469	-0.361469	0.264041	1	Neuro system
Metazoa_SRP	ENSMMUG00000058584	-0.301856	-0.082218	-0.301856	3.46228	-0.301856	-0.0596536	-0.301856	-0.301856	-0.301856	-0.301856	-0.301856	-0.301856	-0.301856	-0.301856	1	Neuro system
IL1RAPL2	ENSMMUG00000006683	-0.460748	2.8753	-0.336913	1.03048	0.46015	-0.430013	-0.645722	-0.645722	0.0716559	-0.645722	-0.645722	-0.645722	-0.645722	0.664425	1	Neuro system
-	ENSMMUG00000056989	0.138462	-0.0255962	0.448737	3.29808	-0.457053	-0.269258	-0.521466	-0.654613	-0.398299	-0.0610105	-0.466874	-0.0469476	-0.329544	-0.654613	1	Neuro system
FRMPD3	ENSMMUG00000022293	-0.204082	1.59656	0.774871	2.50214	-0.660174	-0.682347	-0.689469	-0.431779	-0.570409	0.59428	-0.727557	-0.373921	-0.541671	-0.586436	1	Neuro system
COL4A5	ENSMMUG00000007235	-0.960204	1.56023	-0.560001	1.70092	-0.475498	-0.747831	-1.08409	1.49752	1.02505	-0.647929	-0.473676	-0.684444	0.0969507	-0.24701	1	Neuro system
IRS4	ENSMMUG00000019167	-0.252527	2.21047	-0.313255	2.463	-0.465975	-0.465975	-0.465975	-0.465975	-0.426555	-0.465975	-0.465975	-0.465975	-0.42848	0.00917117	1	Neuro system
KCNE5	ENSMMUG00000050987	-0.216898	0.482164	1.10896	2.87958	-0.473417	-0.60099	-0.472021	-0.60099	-0.60099	-0.371001	-0.60099	-0.60099	-0.60099	0.668567	1	Neuro system
PAK3	ENSMMUG00000018763	1.08378	1.92315	1.28258	1.17802	-0.771025	-0.966746	-0.844394	-0.312864	-0.395069	0.576346	-1.1293	-0.514888	-0.789232	-0.320367	1	Neuro system
DCX	ENSMMUG00000015312	1.28632	2.68984	0.974941	0.426596	-0.597841	-0.597841	-0.597841	-0.597841	-0.597841	-0.555533	-0.597841	-0.462497	-0.308233	-0.464388	1	Neuro system
AMOT	ENSMMUG00000007688	-0.216018	1.91501	0.797784	0.476669	-0.777304	-0.891083	2.09889	-0.19426	-0.219165	-0.59535	-1.04794	-0.089361	-0.253888	-1.00399	1	Neuro system
HTR2C	ENSMMUG00000009607	-0.171889	3.21826	0.489316	0.716487	-0.21314	-0.454582	-0.454582	-0.454582	-0.402374	-0.454582	-0.454582	-0.454582	-0.454582	-0.454582	1	Neuro system
SNORA35	ENSMMUG00000033074	-0.392042	2.56374	-0.392042	2.14076	-0.392042	-0.392042	-0.392042	-0.392042	-0.392042	-0.392042	-0.392042	-0.392042	-0.392042	-0.392042	1	Neuro system
mml-mir-764	ENSMMUG00000033177	-0.392042	2.56374	-0.392042	2.14076	-0.392042	-0.392042	-0.392042	-0.392042	-0.392042	-0.392042	-0.392042	-0.392042	-0.392042	-0.392042	1	Neuro system
ZCCHC12	ENSMMUG00000017574	-0.141554	1.52276	0.906142	2.69118	-0.545926	-0.544525	-0.545836	-0.529375	-0.490142	-0.554148	-0.530708	-0.174786	-0.544001	-0.51908	1	Neuro system
Metazoa_SRP	ENSMMUG00000052837	-0.468989	-0.468989	-0.468989	2.9821	1.42839	-0.468989	-0.468989	-0.468989	-0.468989	-0.468989	-0.211409	0.156305	-0.13449	-0.468989	1	Neuro system
Y_RNA	ENSMMUG00000035549	-0.729882	-0.460856	0.968942	2.95857	-0.222912	0.160112	-0.473624	0.0338444	-0.729882	0.641069	-0.248115	-0.437501	-0.729882	-0.729882	1	Neuro system
TMEM255A	ENSMMUG00000011074	-0.753402	2.46229	1.12124	1.55843	-0.841097	-0.71217	-0.194194	-0.111275	-0.559916	0.0699219	-0.443592	-0.362946	-0.54062	-0.69266	1	Neuro system
-	ENSMMUG00000063143	2.84614	-0.419642	0.252068	1.65387	-0.333458	-0.355905	-0.470676	-0.517085	-0.397966	-0.351563	-0.517085	-0.411183	-0.460433	-0.517085	1	Neuro system
-	ENSMMUG00000055293	-0.359534	-0.431667	0.688669	3.23675	-0.360409	-0.1288	-0.398796	-0.359361	0.396964	-0.311223	-0.488291	-0.276182	-0.60406	-0.60406	1	Neuro system
DCAF12L2	ENSMMUG00000044509	0.2816	2.85067	1.09218	0.738666	-0.650384	-0.479479	-0.696808	-0.696808	-0.576347	-0.613114	-0.564459	-0.321973	-0.524936	0.161187	1	Neuro system
-	ENSMMUG00000049693	0.619342	-0.544194	1.25977	2.66779	0.665056	-0.258533	-0.824917	-0.593481	-0.0466435	-0.239075	-0.736518	-0.387622	-0.600059	-0.980915	1	Neuro system
-	ENSMMUG00000050039	-0.199797	-0.498638	0.194801	3.14924	0.973807	0.0562974	-0.506359	-0.584354	-0.329858	-0.477091	-0.467099	-0.366636	-0.282981	-0.66133	1	Neuro system
-	ENSMMUG00000059153	-0.246979	0.38938	-0.237908	1.83614	-0.323351	-0.414929	-0.535466	2.67313	-0.458882	-0.54154	-0.560079	-0.499636	-0.546255	-0.533625	1	Neuro system
ARHGAP36	ENSMMUG00000011154	-0.359056	0.280136	-0.372883	3.41423	-0.328104	-0.184215	-0.29602	-0.390232	-0.309627	-0.371565	-0.370552	-0.0199782	-0.390232	-0.301906	1	Neuro system
IGSF1	ENSMMUG00000011152	-0.12977	2.96615	0.549607	0.200215	-0.673012	-0.657867	0.178328	-0.436378	-0.589029	0.969292	-0.693057	-0.473404	-0.532264	-0.678808	1	Neuro system
-	ENSMMUG00000022140	-0.397882	0.00684919	0.531679	1.79378	0.3155	-0.701091	-0.952765	0.252883	-0.47023	-0.240958	-0.87384	-0.836345	-0.762991	2.33541	1	Neuro system
FAM127C	ENSMMUG00000053147	-0.658861	0.740446	1.02423	1.93133	0.828156	-0.395351	-1.10699	1.3337	-0.0708268	-0.421917	-1.19208	-0.579766	-0.254194	-1.17789	1	Neuro system
-	ENSMMUG00000038415	1.63464	0.85226	0.72928	2.36923	-0.325334	-0.532679	-0.639776	-0.651932	-0.106257	-0.667217	-0.699491	-0.678107	-0.67307	-0.611544	1	Neuro system
-	ENSMMUG00000044983	1.12028	0.728553	0.524307	2.81629	-0.140914	-0.512681	-0.636129	-0.568322	-0.220848	-0.535276	-0.650718	-0.663427	-0.671754	-0.589362	1	Neuro system
-	ENSMMUG00000064067	-0.141015	-0.199849	-0.145182	3.4617	-0.196254	-0.325324	-0.359331	-0.291118	-0.24955	-0.324038	-0.34723	-0.153431	-0.356296	-0.373082	1	Neuro system
HTATSF1	ENSMMUG00000006450	-0.0127289	0.419076	1.09694	2.86419	0.278834	-0.36616	-0.441035	0.0815153	-0.705014	-0.452924	-0.996175	-0.233327	-0.566553	-0.96664	1	Neuro system
GPR101	ENSMMUG00000005605	-0.459261	0.473171	-0.361127	2.9498	-0.459261	-0.322164	-0.459261	1.39367	-0.459261	-0.459261	-0.459261	-0.459261	-0.459261	-0.459261	1	Neuro system
FGF13	ENSMMUG00000012484	1.52379	0.388204	-0.613924	1.94338	-0.574981	-0.826718	1.50074	-0.695913	-0.571655	-0.633053	-0.910015	0.58801	-0.338792	-0.779071	1	Neuro system
Metazoa_SRP	ENSMMUG00000064527	0.123425	-0.183434	2.19003	2.42264	-0.203324	-0.527744	-0.527744	-0.527744	-0.527744	-0.527744	-0.527744	-0.527744	-0.127389	-0.527744	1	Neuro system
Metazoa_SRP	ENSMMUG00000050394	-0.0587083	-0.17591	1.97606	2.66426	-0.456015	-0.301574	-0.456015	-0.456015	-0.456015	-0.456015	-0.456015	-0.456015	-0.456015	-0.456015	1	Neuro system
-	ENSMMUG00000053535	2.91883	-0.122734	-0.420319	1.60967	-0.403534	-0.506975	-0.506975	-0.234274	-0.33922	-0.27387	-0.506975	-0.268348	-0.475062	-0.470211	1	Neuro system
mml-mir-2114	ENSMMUG00000036374	-0.386748	3.29073	-0.386748	-0.386748	0.30626	-0.386748	-0.386748	0.657235	-0.386748	-0.386748	-0.386748	-0.386748	-0.386748	-0.386748	1	Neuro system
MAMLD1	ENSMMUG00000022263	-0.702841	1.53282	0.994208	0.359223	-0.340409	-0.549584	-0.894431	-0.173917	-0.755958	0.880921	-0.653745	-0.744441	-1.04315	2.09131	1	Neuro system
CD99L2	ENSMMUG00000016610	-0.0520739	2.05271	0.356451	1.37484	-0.359092	-0.470977	1.16092	0.654466	-0.515608	-0.202707	-1.01365	-0.674883	-0.854556	-1.45584	1	Neuro system
PRRG3	ENSMMUG00000016929	0.260714	3.02695	0.148277	0.815459	0.397241	-0.309896	-0.380241	-0.403316	-0.748298	-0.0307893	-0.788248	-0.641274	-0.776863	-0.569715	1	Neuro system
GABRA3	ENSMMUG00000001540	0.295892	2.62334	1.60904	0.761115	-0.559507	-0.559507	-0.559507	-0.559507	-0.559507	-0.559507	-0.559507	-0.523095	-0.559507	-0.290232	1	Neuro system
U6	ENSMMUG00000036834	-0.267261	3.4744	-0.267261	-0.267261	-0.267261	-0.267261	-0.267261	-0.267261	-0.267261	-0.267261	-0.267261	-0.267261	-0.267261	-0.267261	1	Neuro system
GABRQ	ENSMMUG00000054328	0.055888	2.08942	0.413118	2.42932	-0.37149	-0.553717	-0.553717	-0.553717	-0.47491	-0.553717	-0.553717	-0.308496	-0.553717	-0.510539	1	Neuro system
PNMA5	ENSMMUG00000018469	3.37117	0.131649	-0.355676	0.429492	-0.389988	-0.342053	-0.389988	-0.328286	-0.389988	-0.389988	-0.351066	-0.389988	-0.389988	-0.215301	1	Neuro system
PNMA3	ENSMMUG00000010897	0.766843	0.978928	2.11592	1.69694	-0.744017	-0.767711	-0.758826	-0.792574	-0.0484057	-0.759747	-0.0456245	-0.736566	-0.781339	-0.123823	1	Neuro system
PNMA6F	ENSMMUG00000048764	-0.00127903	1.10376	-0.276144	3.17802	-0.405307	-0.405307	-0.405307	-0.405307	-0.405307	-0.405307	-0.405307	-0.405307	-0.405307	-0.356597	1	Neuro system
PNCK	ENSMMUG00000010585	2.38375	0.0739276	-0.235002	1.39469	-0.216843	-0.430709	-0.306863	-0.810299	-0.74995	-0.649955	-0.8223	1.429	-0.350401	-0.709043	1	Neuro system
PLXNB3	ENSMMUG00000003368	-0.321308	1.62039	0.526126	2.78198	-0.322633	-0.497511	-0.556202	-0.324544	-0.554601	-0.557463	-0.585225	-0.555283	-0.380419	-0.273303	1	Neuro system
PDZD4	ENSMMUG00000003377	2.7754	0.0846663	1.27597	1.00559	-0.523306	-0.517351	-0.536647	-0.482638	-0.525185	-0.452253	-0.546567	-0.528578	-0.526298	-0.502798	1	Neuro system
-	ENSMMUG00000055377	-0.513704	0.244812	0.599552	2.2242	-0.418706	-0.439055	-0.479778	2.05214	0.256293	-0.738042	-0.738042	-0.664375	-0.738042	-0.647245	1	Neuro system
GDI1	ENSMMUG00000005502	0.755087	1.52404	1.87307	1.52835	-0.489925	-0.675328	-0.8254	0.181675	-0.58874	-0.232426	-0.95203	-0.481892	-0.749849	-0.866627	1	Neuro system
Metazoa_SRP	ENSMMUG00000054859	2.04204	-0.0803704	0.69845	2.27735	0.154951	-0.649677	-0.378533	-0.649677	-0.649677	-0.166148	-0.649677	-0.649677	-0.649677	-0.649677	1	Neuro system
-	ENSMMUG00000060911	0.00919191	-0.274929	-0.0407549	3.34284	-0.450824	-0.411854	-0.525415	-0.105199	0.408717	-0.679601	-0.172326	-0.239799	-0.397276	-0.462772	1	Neuro system
-	ENSMMUG00000009476	0.984783	1.05534	-0.645373	2.49594	1.0811	-0.272835	-0.320207	-0.254908	-0.786348	-0.68977	-0.614465	-0.59827	-0.705977	-0.729018	1	Neuro system
-	ENSMMUG00000052111	-0.566193	-0.547849	0.312882	2.72749	-0.0906485	-0.606181	-0.644173	-0.526072	1.58868	0.260702	-0.583131	-0.0603779	-0.49295	-0.772176	1	Neuro system
-	ENSMMUG00000061765	0.213164	-0.243679	-0.281979	3.38894	-0.374815	-0.370024	-0.334876	-0.198904	0.152864	-0.147557	-0.4912	-0.286805	-0.451104	-0.57402	1	Neuro system
-	ENSMMUG00000064879	-0.0354002	-0.311641	-0.296288	3.40872	-0.282585	-0.389161	-0.356512	-0.442772	0.0516482	-0.162387	-0.26946	0.102574	-0.43417	-0.582561	1	Neuro system
-	ENSMMUG00000032340	-0.749892	-0.214136	-0.749892	2.00463	-0.749892	1.0225	-0.749892	-0.749892	-0.749892	1.07024	-0.749892	0.996906	1.119	-0.749892	1	Neuro system
DLGAP2	ENSMMUG00000057265	3.18248	0.414972	0.198936	0.601925	0.0866418	-0.395818	-0.511619	-0.582901	-0.435983	-0.489262	-0.604728	-0.398918	-0.602992	-0.462736	1	Neuro system
CLN8	ENSMMUG00000009470	-0.402709	0.26752	-0.232947	3.17685	-0.353717	-0.5437	-0.509576	-0.384878	-0.11177	0.88858	-0.483443	-0.328209	-0.203413	-0.77859	1	Neuro system
XKR5	ENSMMUG00000021275	0.711387	0.460934	0.758385	2.28589	-0.28188	1.53584	-0.706395	-0.956204	-0.578874	-0.649854	-0.286598	-0.7401	-0.640319	-0.912215	1	Neuro system
-	ENSMMUG00000061848	1.2797	-0.269508	0.597028	2.72707	-0.224544	-0.670323	-0.695435	-0.261387	0.57603	-0.286676	-0.48043	-0.582129	-0.854696	-0.854696	1	Neuro system
-	ENSMMUG00000050953	-0.228951	1.06355	0.564799	1.66599	-0.661355	-0.876399	-0.876399	0.0954628	2.19258	-0.682558	-0.876399	-0.504336	-0.611021	-0.264959	1	Neuro system
-	ENSMMUG00000061801	-0.277843	1.34418	-0.205265	1.40821	-0.920214	-0.920214	-0.0574452	-0.277387	1.57108	-0.920214	-0.920214	-0.674117	-0.656916	1.50637	1	Neuro system
-	ENSMMUG00000062322	-0.34933	0.12322	1.72117	2.82699	-0.453399	-0.381528	-0.504967	-0.475379	-0.34733	-0.320069	-0.519909	-0.477289	-0.437832	-0.404343	1	Neuro system
NEIL2	ENSMMUG00000019209	-0.00863538	0.28845	2.45676	1.99227	-0.266247	-0.434131	-0.57909	-0.104015	-0.378168	-0.0976916	-0.727969	-0.462191	-0.831272	-0.848077	1	Neuro system
-	ENSMMUG00000061322	0.0477919	-0.697006	1.5826	2.67761	-0.20225	-0.552247	-0.446921	-0.697006	0.105363	-0.251032	-0.697006	-0.697006	0.524116	-0.697006	1	Neuro system
-	ENSMMUG00000063243	0.140966	-0.467791	-0.203433	3.40377	-0.142593	-0.0238732	-0.517532	-0.164514	-0.031087	-0.348546	-0.428457	-0.355355	-0.34402	-0.517532	1	Neuro system
Metazoa_SRP	ENSMMUG00000051797	0.0107091	-0.308901	-0.308901	3.45623	-0.308901	-0.308901	-0.308901	-0.0690232	-0.308901	-0.308901	-0.308901	-0.308901	-0.308901	-0.308901	1	Neuro system
-	ENSMMUG00000051983	0.539312	-0.573301	-0.144652	3.30451	-0.488021	-0.174075	-0.314663	-0.444831	-0.0200937	-0.265816	-0.492261	0.115256	-0.46806	-0.573301	1	Neuro system
MICU3	ENSMMUG00000017992	0.159051	-0.312633	2.1658	1.93961	0.106287	-0.0777637	-0.820422	-1.12265	-0.516493	0.399634	-0.769726	-1.05518	-0.45793	0.362415	1	Neuro system
-	ENSMMUG00000054747	-1.16817	0.108389	0.847103	2.47809	0.0346439	-1.16817	0.0478033	0.0398182	0.912531	0.277454	-0.787161	0.21921	-0.673385	-1.16817	1	Neuro system
LZTS1	ENSMMUG00000017711	2.45713	1.60749	-0.498016	1.24709	-0.530323	-0.594441	-0.671602	-0.203377	-0.427209	-0.501804	-0.644751	-0.508645	-0.555371	-0.176171	1	Neuro system
-	ENSMMUG00000065227	0.0182366	-0.547776	0.633404	3.29905	-0.124785	-0.382761	-0.547776	-0.122965	-0.181917	-0.293586	-0.2798	-0.547776	-0.373776	-0.547776	1	Neuro system
GFRA2	ENSMMUG00000023361	1.95467	0.760009	-0.124247	1.74054	-0.241705	-0.79702	-0.916075	1.15089	-0.907177	-0.111438	-1.0241	-0.593547	-0.627202	-0.263599	1	Neuro system
DMTN	ENSMMUG00000005870	2.48591	0.27484	1.50258	1.09974	-0.215409	-0.505796	-0.721722	-0.550041	-0.102564	-0.618535	-0.653038	-0.651806	-0.717271	-0.626885	1	Neuro system
NUDT18	ENSMMUG00000049401	-0.237385	-0.0564911	1.84436	2.54558	-0.539634	-0.804533	-0.67917	0.00928468	-0.483478	0.354271	-0.614063	-0.100588	-0.348863	-0.889288	1	Neuro system
LGI3	ENSMMUG00000013028	0.418513	2.34387	0.701232	1.79986	-0.291776	-0.608626	-0.689408	0.262043	-0.532379	-0.691685	-0.683121	-0.663099	-0.683344	-0.682076	1	Neuro system
mml-mir-320a	ENSMMUG00000026995	-0.804938	-0.804938	-0.0103464	2.64546	0.143563	-0.804938	-0.804938	-0.0905016	-0.804938	0.905024	-0.804938	-0.257915	0.95083	0.543511	1	Neuro system
EGR3	ENSMMUG00000058396	2.782	-0.187736	-0.60607	-0.0762354	-0.258767	-0.349714	-0.605491	1.04806	-0.284173	1.17236	-0.708917	-0.590912	-0.683667	-0.650739	1	Neuro system
R3HCC1	ENSMMUG00000016655	-0.360748	0.429769	1.93167	2.09973	0.462648	-0.645291	-0.696178	0.283962	-0.200842	0.12598	-0.957273	-0.557134	-0.618913	-1.29738	1	Neuro system
NEFM	ENSMMUG00000000639	-0.17618	1.13965	0.0732484	3.14851	-0.420665	-0.420222	-0.420954	-0.41706	-0.416692	-0.418083	-0.420833	-0.418042	-0.413301	-0.419377	1	Neuro system
NEFL	ENSMMUG00000003348	0.0307503	0.799207	-0.0853212	3.27621	-0.408636	-0.407311	-0.408982	-0.406063	-0.352476	-0.408169	-0.408996	-0.405729	-0.409074	-0.405414	1	Neuro system
Metazoa_SRP	ENSMMUG00000055537	-0.535038	-0.535038	-0.535038	2.29622	-0.0161703	-0.535038	-0.535038	1.80991	-0.535038	-0.535038	-0.535038	1.26042	-0.535038	-0.535038	1	Neuro system
PNMA2	ENSMMUG00000042420	2.48347	1.40276	0.339193	1.30092	-0.560388	-0.556448	-0.560388	-0.560388	-0.560388	-0.560388	-0.560388	-0.500205	-0.554157	-0.55321	1	Neuro system
Metazoa_SRP	ENSMMUG00000056685	0.131943	0.698492	-0.376158	3.3073	-0.376158	-0.376158	-0.376158	-0.376158	-0.376158	-0.376158	-0.376158	-0.376158	-0.376158	-0.376158	1	Neuro system
STMN4	ENSMMUG00000018670	0.593585	1.64159	0.818606	2.49146	-0.555856	-0.551908	-0.557717	-0.556782	-0.556912	-0.557717	-0.557717	-0.536963	-0.557717	-0.555953	1	Neuro system
SCARA3	ENSMMUG00000021517	-0.166849	2.67898	0.390571	1.0468	-0.419315	-0.759967	-0.694141	0.636535	-1.0191	-0.31793	-0.626189	-0.00443478	0.368225	-1.11317	1	Neuro system
-	ENSMMUG00000056404	1.84204	-0.0521577	0.218943	2.69089	-0.52064	-0.52064	-0.223141	-0.52064	-0.52064	-0.52064	-0.52064	-0.52064	-0.52064	-0.311457	1	Neuro system
PPP2CB	ENSMMUG00000020819	-0.11322	-0.0728584	0.588592	1.8442	-0.225802	-0.438778	-1.41447	-0.0246651	0.572705	-0.40557	-0.87676	1.50699	0.757659	-1.69802	1	Neuro system
-	ENSMMUG00000063894	0.951344	-0.151487	0.160591	3.20706	-0.368902	-0.423454	-0.433936	-0.500408	-0.4151	-0.381868	-0.37544	-0.348723	-0.419265	-0.500408	1	Neuro system
-	ENSMMUG00000059106	-0.145674	-0.405463	0.367292	2.90695	-0.243849	-0.576819	-0.718936	-0.911895	0.20246	-0.0516409	1.17399	-0.361498	-0.323029	-0.911895	1	Neuro system
-	ENSMMUG00000049377	0.523099	-0.197356	1.03745	3.09827	-0.439234	-0.476554	-0.438565	-0.500426	-0.368109	-0.353337	-0.461659	-0.476899	-0.475254	-0.471428	1	Neuro system
-	ENSMMUG00000050508	0.719354	-0.457743	1.4463	2.63549	-0.247083	-0.475635	-0.603295	-0.243984	0.200764	-0.20989	-0.910345	-0.0673192	-0.819236	-0.967387	1	Neuro system
-	ENSMMUG00000050940	-0.488856	-0.251997	0.632917	3.23215	-0.414464	-0.445324	-0.41365	-0.488856	0.476304	-0.354742	-0.488856	-0.0169165	-0.488856	-0.488856	1	Neuro system
-	ENSMMUG00000052821	3.39278	-0.250635	-0.342499	-0.185064	-0.342499	0.467906	-0.342499	-0.342499	-0.342499	-0.342499	-0.342499	-0.342499	-0.342499	-0.342499	1	Neuro system
Metazoa_SRP	ENSMMUG00000061939	-0.267261	-0.267261	-0.267261	3.4744	-0.267261	-0.267261	-0.267261	-0.267261	-0.267261	-0.267261	-0.267261	-0.267261	-0.267261	-0.267261	1	Neuro system
-	ENSMMUG00000062108	0.837332	-0.166967	0.485129	2.29273	-0.0803832	0.658884	-0.987158	0.99118	-0.30988	0.0734255	-1.1497	-0.244097	-1.10666	-1.29384	1	Neuro system
-	ENSMMUG00000060473	-0.369162	-0.119797	1.27897	2.81926	-0.775338	-0.346911	-0.568918	-0.774469	0.595112	-0.249004	-0.593421	-0.200683	0.185977	-0.881613	1	Neuro system
-	ENSMMUG00000061001	0.895222	-0.20905	0.663114	2.71671	-0.0765963	-0.645977	-0.86535	-0.5575	0.981247	-0.321301	-0.370369	-0.751635	-0.629203	-0.829311	1	Neuro system
CHRNB3	ENSMMUG00000063923	-0.393661	3.26544	0.351699	-0.393661	-0.393661	-0.393661	-0.393661	-0.393661	-0.393661	-0.393661	-0.393661	-0.393661	-0.393661	0.713128	1	Neuro system
-	ENSMMUG00000054991	-0.199232	-0.549861	0.160153	2.49462	-0.576064	-0.472001	-0.976439	-0.077943	1.42241	1.11538	-0.318094	-0.510484	-0.508993	-1.00344	1	Neuro system
-	ENSMMUG00000053228	0.190231	-0.313207	-0.384741	3.41571	-0.35104	-0.384741	-0.384741	0.0721787	-0.166124	-0.202473	-0.384741	-0.384741	-0.384741	-0.33683	1	Neuro system
-	ENSMMUG00000057165	-0.435503	-0.425474	-0.0276723	3.18228	-0.436126	-0.609868	-0.0829416	0.175331	0.742601	-0.609868	-0.444764	0.191737	-0.609868	-0.609868	1	Neuro system
-	ENSMMUG00000047485	0.507677	-0.630267	1.02411	3.03236	-0.520038	-0.42444	-0.633131	-0.262347	0.194587	-0.280601	-0.474487	-0.362702	-0.480114	-0.69061	1	Neuro system
OPRK1	ENSMMUG00000065247	1.4369	1.83369	-0.205527	2.07687	-0.476721	-0.0792801	-0.473477	-0.0713963	-0.663278	-0.544123	-0.773166	-0.626623	-0.720904	-0.712959	1	Neuro system
-	ENSMMUG00000055000	-0.707577	-0.248771	0.982473	2.96182	0.157026	0.472954	-0.5619	-0.490496	-0.520621	-0.447792	-0.707577	-0.541365	0.359399	-0.707577	1	Neuro system
PENK	ENSMMUG00000006775	-0.217603	-0.341705	2.16067	2.47117	-0.521931	-0.521931	-0.521931	-0.521931	0.0603348	-0.521931	-0.521931	-0.106869	-0.521931	-0.372482	1	Neuro system
U6	ENSMMUG00000064813	-0.148445	-0.121277	-0.6208	1.09136	-0.6208	-0.6208	-0.6208	2.92438	-0.6208	-0.6208	-0.6208	-0.0779119	-0.0399674	0.717457	1	Neuro system
-	ENSMMUG00000056803	1.52401	2.11643	0.409708	1.29841	-0.196099	0.120825	-0.880702	-0.751787	-0.325575	0.0449523	-0.718059	-0.880702	-0.880702	-0.880702	1	Neuro system
Metazoa_SRP	ENSMMUG00000059825	0.695593	0.127861	1.50215	2.76602	-0.509163	-0.509163	-0.509163	-0.509163	-0.509163	-0.509163	-0.509163	-0.509163	-0.509163	-0.509163	1	Neuro system
NKAIN3	ENSMMUG00000009144	0.183909	1.25393	1.01394	2.20115	-0.697925	-0.626179	-0.697925	-0.697925	1.26393	-0.697925	-0.697925	-0.556505	-0.546621	-0.697925	1	Neuro system
Metazoa_SRP	ENSMMUG00000062503	-0.720423	-0.420146	-0.658186	2.55627	-0.350233	0.379121	1.80865	-0.813386	0.148044	-0.145407	-0.549309	-0.0654749	-0.356137	-0.813386	1	Neuro system
CRH	ENSMMUG00000021587	0.237746	-0.197783	-0.329833	3.43506	-0.329833	-0.316595	-0.295528	-0.244635	-0.329833	-0.309441	-0.329833	-0.329833	-0.329833	-0.329833	1	Neuro system
VXN	ENSMMUG00000022419	1.82622	1.36519	-0.00222022	0.338029	1.68872	0.689376	-0.721605	-0.74891	-0.735769	-0.742823	-0.723243	-0.74891	-0.744744	-0.73931	1	Neuro system
U6	ENSMMUG00000049278	-0.389862	-0.389862	0.734674	3.27249	0.281316	-0.389862	-0.389862	-0.389862	-0.389862	-0.389862	-0.389862	-0.389862	-0.389862	-0.389862	1	Neuro system
PPP1R42	ENSMMUG00000003178	-0.249745	1.57799	0.609635	1.03208	-0.633407	-0.723842	-0.631022	-0.605102	2.11841	-0.851413	-0.696037	-0.851413	-0.716897	0.620759	1	Neuro system
C8H8orf34	ENSMMUG00000004573	0.846729	1.85925	1.26135	1.85159	-0.524785	-0.638085	-0.751892	-0.249309	-0.384499	-0.797911	-0.797911	-0.27285	-0.797911	-0.603765	1	Neuro system
Metazoa_SRP	ENSMMUG00000055757	1.67281	-0.780998	-0.823235	2.62643	-0.225836	-0.318209	-0.790514	0.0145747	0.121445	0.0402344	-0.353163	-0.545689	-0.864929	0.227084	1	Neuro system
KCNB2	ENSMMUG00000013770	0.319484	2.9802	-0.0878155	0.591486	-0.400761	-0.814771	-0.778905	0.151127	-0.426909	-0.560339	-0.864064	0.156144	0.539311	-0.804186	1	Neuro system
TERF1	ENSMMUG00000023208	-0.0966853	-0.224324	1.27359	2.4315	-0.644811	-0.50833	-0.967572	0.711836	0.84481	-0.0321477	-1.07427	-0.459134	-0.167573	-1.08689	1	Neuro system
Metazoa_SRP	ENSMMUG00000057574	1.06494	2.77546	-0.469113	-0.469113	-0.469113	1.31984	-0.469113	-0.469113	-0.469113	-0.469113	-0.469113	-0.469113	-0.469113	-0.469113	1	Neuro system
ZNF704	ENSMMUG00000009969	0.697128	-0.17009	1.68875	1.03457	0.471034	-0.560365	-1.09616	1.8158	-0.684935	-0.806868	-0.849762	-0.443518	0.119002	-1.21458	1	Neuro system
Metazoa_SRP	ENSMMUG00000055843	-0.225686	-0.210312	-0.0467252	3.38278	0.306076	-0.493001	-0.223728	-0.0917438	-0.493001	-0.493001	-0.239883	-0.18577	-0.493001	-0.493001	1	Neuro system
PMP2	ENSMMUG00000047024	-0.0751753	3.46884	-0.253554	-0.260099	-0.282124	-0.286803	-0.285048	-0.29081	-0.290158	-0.289552	-0.290574	-0.286183	-0.288755	-0.290009	1	Neuro system
Metazoa_SRP	ENSMMUG00000053293	-0.267261	-0.267261	-0.267261	3.4744	-0.267261	-0.267261	-0.267261	-0.267261	-0.267261	-0.267261	-0.267261	-0.267261	-0.267261	-0.267261	1	Neuro system
U6	ENSMMUG00000052856	1.42257	-0.497009	-0.497009	1.82231	-0.497009	-0.497009	-0.497009	-0.497009	-0.497009	-0.497009	-0.497009	-0.497009	-0.497009	2.22222	1	Neuro system
-	ENSMMUG00000063555	1.68198	-0.241834	-0.757869	1.89527	0.21458	1.51833	-0.757869	-0.757869	-0.127042	-0.757869	-0.757869	0.363799	-0.757869	-0.757869	1	Neuro system
-	ENSMMUG00000055409	-0.929526	-0.929526	0.115112	2.0946	-0.721695	-0.929526	0.120994	-0.303353	1.49722	1.31854	-0.534529	0.5088	-0.67305	-0.634061	1	Neuro system
-	ENSMMUG00000051248	0.200836	-0.325913	-0.242569	3.21959	-0.147619	-0.282599	-0.534116	-0.340099	0.844906	-0.253549	-0.544039	-0.478396	-0.555899	-0.560539	1	Neuro system
Metazoa_SRP	ENSMMUG00000063301	-0.319394	-0.0448834	0.11397	3.44425	-0.319394	-0.319394	-0.319394	-0.319394	-0.319394	-0.319394	-0.319394	-0.319394	-0.319394	-0.319394	1	Neuro system
-	ENSMMUG00000061241	0.126447	-0.17897	-0.101366	3.44322	-0.297142	-0.339065	-0.347948	-0.302549	-0.3292	-0.311219	-0.335355	-0.319806	-0.34479	-0.362259	1	Neuro system
TMEM64	ENSMMUG00000004011	-0.967517	0.90067	-0.503809	2.56117	-0.601654	-0.856556	-1.08246	0.295944	1.02999	0.139076	-0.424714	-0.560815	-0.468011	0.538688	1	Neuro system
NECAB1	ENSMMUG00000013392	2.74078	1.36177	0.582313	0.602753	-0.427253	-0.510737	-0.610008	-0.5596	-0.628504	-0.529554	-0.602425	-0.227548	-0.628504	-0.563479	1	Neuro system
-	ENSMMUG00000047716	-0.20047	-0.812918	0.9764	2.79452	-0.20266	-0.098706	-0.812918	-0.123424	0.57264	-0.812918	-0.522958	-0.636943	0.693278	-0.812918	1	Neuro system
-	ENSMMUG00000061159	0.266972	-0.287983	0.247136	2.93104	0.133518	0.677878	0.667825	-0.54512	-0.333704	-0.604287	-0.714691	-0.763069	-0.837756	-0.837756	1	Neuro system
Metazoa_SRP	ENSMMUG00000059680	1.05744	-0.510888	0.758772	2.93498	-0.299594	-0.486345	-0.294669	-0.749783	-0.165709	-0.343982	-0.749783	0.0291207	-0.749783	-0.429775	1	Neuro system
MTDH	ENSMMUG00000014210	-1.25107	-0.471699	0.279871	2.17238	-0.384135	-1.03969	-0.745221	0.198373	-0.291241	1.08758	-0.596336	0.861797	1.14077	-0.961378	1	Neuro system
-	ENSMMUG00000060948	3.44101	0.0820976	-0.0786702	-0.129856	-0.31304	-0.354145	-0.354145	-0.16838	-0.354145	-0.354145	-0.354145	-0.354145	-0.354145	-0.354145	1	Neuro system
KCNS2	ENSMMUG00000056926	3.2836	0.403438	0.403284	-0.0349277	-0.24377	-0.00133819	-0.498807	-0.498807	-0.498807	-0.498807	-0.498807	-0.498807	-0.358926	-0.458521	1	Neuro system
Metazoa_SRP	ENSMMUG00000046389	-0.488388	-0.775794	0.593507	2.98563	0.0557912	0.407602	-0.735619	-0.089264	-0.342563	0.445154	-0.373347	0.158478	-0.925248	-0.915937	1	Neuro system
SNX31	ENSMMUG00000009952	-0.499167	1.09039	-0.378854	1.88717	-0.653481	-0.746924	-0.755065	1.11671	1.77743	-0.162195	-0.806695	-0.571063	-0.491569	-0.806695	1	Neuro system
Metazoa_SRP	ENSMMUG00000063500	0.428347	0.504964	1.32017	1.51052	0.423583	0.649692	-0.903783	-0.903783	-0.903783	1.4892	-0.903783	-0.903783	-0.903783	-0.903783	1	Neuro system
-	ENSMMUG00000043850	-0.332402	0.0548678	2.16769	2.39693	-0.510658	-0.510658	-0.510658	-0.510658	-0.510658	-0.510658	-0.510658	0.308837	-0.510658	-0.510658	1	Neuro system
U6	ENSMMUG00000034141	-0.267261	3.4744	-0.267261	-0.267261	-0.267261	-0.267261	-0.267261	-0.267261	-0.267261	-0.267261	-0.267261	-0.267261	-0.267261	-0.267261	1	Neuro system
BAALC	ENSMMUG00000019398	1.27565	2.25263	0.973029	1.37054	-0.62049	-0.611489	-0.62049	-0.496909	-0.480799	-0.62049	-0.598565	-0.587964	-0.614163	-0.62049	1	Neuro system
mml-mir-3151	ENSMMUG00000038671	-0.648419	1.37159	1.74328	1.94799	-0.648419	-0.648419	-0.648419	0.0683938	-0.648419	-0.648419	-0.648419	-0.648419	-0.648419	0.704515	1	Neuro system
CTHRC1	ENSMMUG00000019402	-0.484169	3.13205	-0.497069	0.687201	-0.126006	-0.577701	-0.159364	0.0170178	0.63342	-0.332852	-0.574905	-0.442306	-0.56753	-0.707788	1	Neuro system
KCNV1	ENSMMUG00000018706	3.4728	-0.225552	-0.217381	-0.273903	-0.289578	-0.269406	-0.289578	-0.198698	-0.289578	-0.289578	-0.281388	-0.279638	-0.278943	-0.289578	1	Neuro system
-	ENSMMUG00000049293	-0.385264	-0.198185	0.567372	3.3324	-0.292986	-0.553044	-0.515486	-0.245229	-0.263846	-0.0172355	-0.482435	-0.21023	-0.209193	-0.526635	1	Neuro system
-	ENSMMUG00000001087	2.24843	2.3089	0.15825	-0.157587	-0.518633	-0.536061	-0.360361	-0.0713256	-0.431866	-0.196713	-0.784728	-0.356736	-0.48188	-0.819694	1	Neuro system
Metazoa_SRP	ENSMMUG00000060332	-0.6372	-0.258924	1.4378	2.46923	-0.0647694	-0.19642	-0.867324	-0.694608	-0.421082	1.1996	-0.43152	0.0583795	-0.725838	-0.867324	1	Neuro system
CCN3	ENSMMUG00000005631	0.0697395	3.23464	-0.424884	0.458993	-0.194944	-0.227381	-0.441998	0.468693	-0.0903961	-0.56879	-0.585989	-0.574134	-0.547068	-0.576479	1	Neuro system
-	ENSMMUG00000050392	0.299062	0.218132	0.259259	3.24137	-0.565952	-0.565952	-0.441473	-0.38046	-0.406202	0.321975	-0.565952	-0.281901	-0.565952	-0.565952	1	Neuro system
ENPP2	ENSMMUG00000004903	-0.871153	2.40693	-0.0421708	0.859275	-1.05826	-0.670449	-1.21268	-0.327009	-0.382504	0.620566	0.472982	0.298706	0.878055	-0.972293	1	Neuro system
SNORD39	ENSMMUG00000057685	-0.591925	2.00616	1.45884	1.63437	-0.591925	-0.591925	-0.591925	-0.591925	-0.591925	-0.591925	-0.591925	0.819889	-0.591925	-0.591925	1	Neuro system
Metazoa_SRP	ENSMMUG00000065153	0.0673543	-0.222581	-0.725923	3.01212	-0.409747	-0.725923	1.03207	-0.249619	0.299592	0.129082	-0.575694	-0.178885	-0.725923	-0.725923	1	Neuro system
Metazoa_SRP	ENSMMUG00000056864	-0.805911	-0.0323921	-0.602388	1.8454	-0.320022	-0.805911	2.50972	-0.622919	0.297274	0.0700519	-0.575044	-0.245464	0.0935171	-0.805911	1	Neuro system
Metazoa_SRP	ENSMMUG00000060376	-0.375928	-0.375928	-0.375928	3.00688	-0.375928	-0.375928	1.50426	-0.375928	-0.375928	-0.375928	-0.375928	-0.375928	-0.375928	-0.375928	1	Neuro system
-	ENSMMUG00000058752	0.880725	0.43783	1.16463	2.5736	-0.381343	-0.847618	-0.853882	-0.887043	-0.639541	-0.690886	-0.0315808	0.385243	-0.452484	-0.657653	1	Neuro system
-	ENSMMUG00000053718	-0.53892	0.0823229	-0.375463	3.01002	0.0464345	-0.53892	-0.440293	-0.391952	1.35967	-0.36304	-0.353501	-0.53892	-0.418526	-0.53892	1	Neuro system
-	ENSMMUG00000059362	0.0482925	0.490819	-0.611511	3.14504	-0.324813	-0.673811	-0.651909	0.668239	-0.231433	-0.00287239	-0.31027	-0.486214	-0.767421	-0.292131	1	Neuro system
KCNQ3	ENSMMUG00000000892	1.03314	1.97113	0.654353	2.07936	-0.586336	-0.586336	-0.586336	-0.581688	-0.574327	-0.569648	-0.586336	-0.550747	-0.582528	-0.533698	1	Neuro system
-	ENSMMUG00000058738	-0.456479	-0.212032	0.86679	2.9049	0.165218	0.099031	-0.453425	-0.873429	-0.873429	0.624553	-0.676026	-0.394219	0.151977	-0.873429	1	Neuro system
-	ENSMMUG00000052475	1.29499	0.343795	1.60905	2.32517	-0.579359	-0.628406	-0.575002	-0.425822	-0.597634	-0.323477	-0.632853	-0.51566	-0.633208	-0.661581	1	Neuro system
-	ENSMMUG00000056740	-0.38056	0.618342	-0.317665	3.27133	-0.100064	-0.36495	-0.474507	0.371613	-0.474507	-0.474507	-0.474507	-0.366532	-0.358985	-0.474507	1	Neuro system
-	ENSMMUG00000059763	-0.843238	0.705624	0.912044	2.84389	-0.414004	-0.555985	-0.424923	-0.444917	-0.0852711	-0.0491159	-0.550197	0.562852	-0.901949	-0.754812	1	Neuro system
-	ENSMMUG00000056225	-0.213648	0.0392821	0.507978	3.14119	-0.354395	0.203687	0.421662	-0.24809	-0.680651	-0.520512	-0.704732	-0.050451	-0.770661	-0.770661	1	Neuro system
Metazoa_SRP	ENSMMUG00000041901	-0.340654	-0.340654	-0.340654	3.41586	-0.340654	-0.340654	0.181321	-0.340654	-0.340654	-0.340654	0.150005	-0.340654	-0.340654	-0.340654	1	Neuro system
TSNARE1	ENSMMUG00000001432	0.0897434	0.758899	0.938402	2.53709	-0.501423	-0.813003	-0.67248	0.567337	-0.702973	0.747331	-0.949032	-0.389134	-0.734326	-0.876426	1	Neuro system
ADGRB1	ENSMMUG00000019877	2.22551	0.774224	0.196913	2.13402	-0.547803	-0.539338	-0.554619	-0.553253	-0.553538	-0.443371	-0.552715	-0.549012	-0.554466	-0.482557	1	Neuro system
ARC	ENSMMUG00000018519	2.94579	0.675597	-0.469568	0.312919	-0.571392	-0.523975	-0.550913	1.07655	-0.282286	-0.571392	-0.552142	-0.571392	-0.346397	-0.571392	1	Neuro system
-	ENSMMUG00000049486	0.441386	0.714026	0.969371	2.96001	-0.518189	-0.518189	-0.518189	-0.518189	-0.518189	-0.518189	-0.518189	-0.518189	-0.518189	-0.421095	1	Neuro system
SLURP2	ENSMMUG00000041404	0.111501	0.870023	0.949822	2.168	1.35423	0.366461	-0.12947	-0.728912	-0.792923	-0.770097	-0.8468	-0.884693	-0.814578	-0.852564	1	Neuro system
-	ENSMMUG00000062307	2.84409	-0.344565	0.736812	1.3399	-0.390515	-0.534662	-0.607003	-0.392553	-0.490358	0.06967	-0.576283	-0.50465	-0.582041	-0.567842	1	Neuro system
LY6H	ENSMMUG00000014830	1.07381	0.106117	1.25088	2.75245	-0.538948	-0.52817	-0.538948	-0.518138	-0.515052	-0.538948	-0.534572	-0.496459	-0.533265	-0.440756	1	Neuro system
TOP1MT	ENSMMUG00000022933	-0.9457	1.10127	1.55799	1.47328	-0.452255	-0.996602	-0.455802	0.566286	-0.33419	1.36163	-0.828321	-0.143638	-0.747232	-1.15671	1	Neuro system
RHPN1	ENSMMUG00000010939	-0.125258	1.18648	0.44005	3.02932	-0.488704	-0.496733	-0.543857	-0.352341	-0.125135	-0.435508	-0.556331	-0.506825	-0.554087	-0.471075	1	Neuro system
TIGD5	ENSMMUG00000014668	-0.327643	0.226791	2.0957	2.35488	0.0239949	-0.472239	-0.488855	-0.317118	-0.423705	0.18453	-0.896331	-0.48617	-0.761522	-0.712318	1	Neuro system
MAPK15	ENSMMUG00000001187	0.765964	-0.541432	0.403613	3.16151	-0.599178	-0.599178	-0.599178	-0.0254112	-0.175627	-0.501087	-0.444061	-0.0343429	-0.599178	-0.212412	1	Neuro system
-	ENSMMUG00000057609	1.97624	0.187107	0.717291	1.81909	-0.791706	-0.846681	-0.871405	0.317839	0.08737	-0.807834	-1.02057	-0.315864	-0.97664	0.525764	1	Neuro system
SCRIB	ENSMMUG00000013552	-0.0458687	0.441533	0.929993	2.85099	-0.548177	-0.887161	-0.519625	0.682974	-0.54678	0.079913	-0.868308	-0.263385	-0.699118	-0.606984	1	Neuro system
NRBP2	ENSMMUG00000028891	-0.474979	1.41123	0.918852	2.62638	-0.428715	-0.662767	-0.641614	0.134219	-0.650223	-0.525685	0.207198	-0.569904	-0.7667	-0.577288	1	Neuro system
Metazoa_SRP	ENSMMUG00000063793	1.78463	-0.698868	-0.698868	1.55163	-0.698868	-0.698868	-0.698868	1.16508	-0.698868	-0.698868	-0.698868	0.7283	-0.698868	1.06017	1	Neuro system
PLEC	ENSMMUG00000000388	-0.786638	0.274729	0.653491	2.2175	0.0451105	-0.7639	1.50874	0.538329	-1.02556	-0.0553304	-0.9675	0.187817	-0.673649	-1.15314	1	Neuro system
mml-mir-661	ENSMMUG00000060194	0.748295	-0.356275	2.26354	1.85656	-0.319955	-0.507898	-0.580439	-0.0692933	-0.646885	0.531973	-0.932383	-0.646815	-0.946898	-0.393528	1	Neuro system
-	ENSMMUG00000055579	1.18436	-0.431123	0.202698	3.04008	-0.646219	-0.468323	-0.594997	-0.493562	-0.514747	-0.372188	0.172308	-0.295566	-0.20853	-0.574187	1	Neuro system
LRRC24	ENSMMUG00000040973	1.52079	0.011632	0.115949	2.0981	1.22357	-0.889301	-0.528171	-0.114247	-0.936451	-1.07121	-0.272948	-0.135945	-1.23621	0.214439	1	Neuro system
C8orf82	ENSMMUG00000059443	-0.554897	-0.345168	0.235428	1.9378	1.16061	-0.311138	0.186504	0.594009	1.40149	-1.16798	-0.428682	-0.102897	-1.21585	-1.38924	1	Neuro system
ARHGAP39	ENSMMUG00000061544	-0.129985	1.23192	2.12063	2.02103	-0.532405	-0.679245	-0.517635	-0.503166	-0.510837	-0.329673	-0.715666	-0.35218	-0.596114	-0.50667	1	Neuro system
-	ENSMMUG00000049921	-0.621554	0.762697	0.28844	2.86882	-0.0241009	-0.406457	-0.801628	-0.00783326	-0.0406528	-0.387313	-0.794001	0.84381	-0.792593	-0.887629	1	Neuro system
Metazoa_SRP	ENSMMUG00000038942	-0.703708	0.110674	1.54617	2.7855	-0.128206	-0.254684	-0.703708	0.163259	-0.703708	-0.0120295	-0.703708	-0.261167	-0.703708	-0.430984	1	Neuro system
-	ENSMMUG00000058039	2.16829	-0.433466	0.426075	1.61145	-0.19237	-0.770266	-0.795925	0.0319496	0.403523	0.765084	-1.08348	-0.0958763	-0.836405	-1.19858	1	Neuro system
-	ENSMMUG00000056742	0.778671	-0.325456	0.964313	1.75941	-0.405706	-1.01995	-0.833997	0.862025	0.735816	0.883035	-1.19486	0.164636	-1.04387	-1.32407	1	Neuro system
ADARB2	ENSMMUG00000017120	1.29636	1.38891	1.79941	1.51838	-0.667634	-0.607175	-0.656712	-0.691145	-0.142387	-0.689595	-0.619473	-0.626606	-0.692571	-0.609766	1	Neuro system
-	ENSMMUG00000065177	2.34555	1.07452	1.58987	0.133389	-0.692526	-0.161094	-0.692526	-0.692526	-0.692526	-0.692526	-0.692526	-0.51794	-0.692526	0.383391	1	Neuro system
-	ENSMMUG00000052452	0.333786	-0.166821	0.101324	3.34046	-0.368233	-0.221412	-0.630197	-0.367106	-0.063744	-0.630197	-0.381255	-0.0258736	-0.414676	-0.506055	1	Neuro system
Metazoa_SRP	ENSMMUG00000051930	-0.378198	-0.610001	0.550968	3.171	0.0829213	-0.339682	-0.610001	-0.610001	-0.610001	0.222801	-0.390509	0.455664	-0.324964	-0.610001	1	Neuro system
Metazoa_SRP	ENSMMUG00000054418	-1.06922	-0.648158	0.260225	1.81724	0.914474	0.788064	0.134017	0.126116	-1.06922	-1.06922	1.19288	0.761247	-1.06922	-1.06922	1	Neuro system
Metazoa_SRP	ENSMMUG00000055072	0.506386	-0.0734184	0.109243	3.3485	-0.389071	-0.389071	-0.389071	-0.389071	-0.389071	-0.389071	-0.389071	-0.389071	-0.389071	-0.389071	1	Neuro system
Metazoa_SRP	ENSMMUG00000056189	-0.241562	0.157126	-0.364993	3.43793	-0.242004	-0.364993	-0.364993	-0.364993	-0.364993	-0.143267	-0.364993	-0.223131	-0.364993	-0.190144	1	Neuro system
-	ENSMMUG00000051437	0.072332	0.329646	0.114267	3.37071	-0.392218	-0.392218	-0.392218	-0.392218	-0.392218	-0.392218	-0.392218	-0.370425	-0.392218	-0.378788	1	Neuro system
-	ENSMMUG00000050485	-0.612578	2.79253	1.17928	1.11651	-0.493748	-0.195363	-0.492448	-0.612578	-0.458408	-0.612578	-0.499655	-0.201387	-0.465934	-0.443642	1	Neuro system
ACBD7	ENSMMUG00000040456	1.17024	0.506337	0.632417	2.87801	-0.522554	-0.518628	-0.525482	-0.525482	-0.495089	-0.525482	-0.519917	-0.515349	-0.521869	-0.517156	1	Neuro system
-	ENSMMUG00000050160	1.57661	-0.47518	1.5037	1.73619	-0.749381	-0.670477	-0.744313	0.531901	0.289813	-0.795052	0.328034	-0.678304	-0.640961	-1.21258	1	Neuro system
C1QL3	ENSMMUG00000016064	3.3877	-0.459385	-0.109956	0.319778	-0.435412	-0.369557	-0.40443	-0.213643	-0.159094	-0.129249	-0.459864	-0.0672577	-0.444161	-0.45547	1	Neuro system
-	ENSMMUG00000054835	0.663472	-0.499185	-0.166295	2.94582	-0.211522	-0.0224764	-0.517953	-0.426874	1.11962	-0.334854	-0.540553	-0.679747	-0.434815	-0.894639	1	Neuro system
-	ENSMMUG00000063350	0.172688	-0.150356	-0.326226	3.44133	-0.326226	-0.326226	-0.326226	-0.201409	-0.326226	-0.326226	-0.326226	-0.326226	-0.326226	-0.326226	1	Neuro system
Metazoa_SRP	ENSMMUG00000059465	-0.783509	0.0617213	-0.366526	1.29879	0.659971	0.498081	-0.63255	2.59077	-0.589775	-0.693775	-0.783509	0.307337	-0.783509	-0.783509	1	Neuro system
-	ENSMMUG00000045044	0.369827	1.8187	-0.137577	2.35389	-0.585532	-0.565262	-0.927326	0.351682	-0.127132	-0.417377	0.335026	-0.746476	-0.918842	-0.803596	1	Neuro system
-	ENSMMUG00000056500	-0.300385	-1.05243	-0.145401	2.44945	-0.685199	0.489596	0.0152443	0.0832181	1.47478	0.49185	-0.643064	-0.151837	-0.730615	-1.29521	1	Neuro system
SPAG6	ENSMMUG00000000882	0.889233	-0.0669673	1.96827	1.97387	-0.722531	-0.722531	-0.597641	-0.722531	0.559697	-0.722531	-0.722531	-0.722531	-0.722531	0.331249	1	Neuro system
PIP4K2A	ENSMMUG00000015034	0.403548	1.63158	-0.174219	1.27499	-0.621886	-0.682615	-0.892799	-0.399716	-0.447928	2.19229	-0.689851	-0.328286	-0.233252	-1.03186	1	Neuro system
Metazoa_SRP	ENSMMUG00000059792	-0.526113	0.340909	-0.167013	3.01715	-0.351826	-0.475025	-0.679643	-0.449184	-0.339396	1.25092	-0.555035	-0.150276	-0.329035	-0.586434	1	Neuro system
Metazoa_SRP	ENSMMUG00000053327	1.49392	-0.375544	-0.375544	3.01261	-0.375544	-0.375544	-0.375544	-0.375544	-0.375544	-0.375544	-0.375544	-0.375544	-0.375544	-0.375544	1	Neuro system
-	ENSMMUG00000049319	-0.29318	1.84344	0.632805	2.49201	-0.254351	-0.496646	-0.704787	-0.11688	-0.580539	-0.509064	-0.661059	0.0906869	-0.751312	-0.691117	1	Neuro system
-	ENSMMUG00000051679	-0.0996401	-0.362283	2.47377	2.22349	-0.432734	-0.427555	-0.432734	-0.419401	-0.398285	-0.432734	-0.424323	-0.402107	-0.432734	-0.432734	1	Neuro system
Metazoa_SRP	ENSMMUG00000049491	1.9153	-0.388182	-0.388182	2.74288	-0.388182	-0.388182	-0.388182	-0.388182	-0.388182	-0.388182	-0.388182	-0.388182	-0.388182	-0.388182	1	Neuro system
Metazoa_SRP	ENSMMUG00000049469	1.49366	0.00753375	-0.683033	2.07844	-0.466142	-0.429195	-0.683033	-0.683033	-0.401639	-0.683033	-0.270815	1.81869	-0.415375	-0.683033	1	Neuro system
MKX	ENSMMUG00000020660	1.06186	1.31903	1.50985	1.96436	-0.691486	-0.422393	-0.054312	-0.725966	-0.831212	-0.705262	-0.764822	-0.428296	-0.400135	-0.831212	1	Neuro system
Metazoa_SRP	ENSMMUG00000052928	0.809949	-1.16604	-0.183104	2.6289	0.306146	-0.848886	-0.426698	-0.308799	1.14384	0.358506	-0.486841	-0.285391	-0.817294	-0.724284	1	Neuro system
Metazoa_SRP	ENSMMUG00000057279	-1.41164	-0.0945541	1.45862	2.03308	0.44234	0.979934	-0.339801	-1.1012	0.103583	-0.704322	-0.157693	0.434876	-0.519549	-1.12366	1	Neuro system
Metazoa_SRP	ENSMMUG00000063527	0.843925	2.0758	-1.25727	0.646796	-0.210428	-0.0321051	0.859316	-1.25727	-1.25727	0.629978	-1.25727	-0.0497949	0.0345999	0.230984	1	Neuro system
-	ENSMMUG00000065147	-0.782083	-0.290846	0.835822	2.7256	-0.554859	-0.759299	-0.274627	-0.164513	0.498888	1.13341	-0.746086	-0.288828	-0.413377	-0.919201	1	Neuro system
-	ENSMMUG00000058414	0.542699	-0.383505	0.271136	3.26639	-0.488265	-0.427916	-0.527789	-0.262769	0.12301	-0.255699	-0.567456	-0.239237	-0.393333	-0.657264	1	Neuro system
-	ENSMMUG00000063444	2.22241	-0.141019	-0.951095	0.0405517	1.33874	-0.0577954	-0.951095	-0.951095	0.605054	1.01468	-0.951095	-0.825323	-0.68197	0.289048	1	Neuro system
-	ENSMMUG00000047658	1.66496	1.21253	0.798454	1.8185	-0.348092	-0.436334	-0.790231	-0.342926	-0.0558578	-0.0154501	-0.835756	-0.683268	-0.437503	-1.54903	1	Neuro system
RET	ENSMMUG00000015400	-0.893073	1.83182	-0.151112	1.6106	1.75787	-0.37789	0.372936	-0.876682	-0.805986	-0.457452	-0.125815	-0.48721	-0.690635	-0.707372	1	Neuro system
-	ENSMMUG00000056157	-0.290124	1.54447	0.549888	2.80307	-0.554804	-0.554804	-0.288185	-0.356153	-0.554804	-0.079344	-0.554804	-0.554804	-0.554804	-0.554804	1	Neuro system
Metazoa_SRP	ENSMMUG00000056810	-0.292531	-0.277446	-0.116947	3.01018	-0.424136	-0.248952	-0.422706	1.41363	-0.554802	-0.319236	-0.554802	-0.102651	-0.554802	-0.554802	1	Neuro system
Metazoa_SRP	ENSMMUG00000050753	-0.658009	0.0877042	-0.461802	3.17599	-0.306692	-0.658009	-0.658009	-0.30518	0.557452	-0.235772	-0.212872	0.557667	-0.224461	-0.658009	1	Neuro system
CHAT	ENSMMUG00000004692	-0.426639	-0.00230428	-0.426639	2.68059	-0.426639	-0.426639	-0.426639	-0.426639	-0.426639	-0.426639	-0.426639	1.96307	-0.426639	-0.374965	1	Neuro system
SLC18A3	ENSMMUG00000047299	-0.290117	-0.105524	-0.290117	3.46892	-0.290117	-0.290117	-0.290117	-0.290117	-0.290117	-0.290117	-0.290117	-0.172107	-0.290117	-0.290117	1	Neuro system
ARHGAP22	ENSMMUG00000004063	-0.145592	1.54828	-0.057939	2.91207	-0.29265	-0.580963	-0.411164	-0.288698	-0.548759	-0.0263302	-0.60012	-0.49254	-0.541561	-0.474034	1	Neuro system
-	ENSMMUG00000028672	1.16303	0.0457563	-0.552596	2.86016	0.412252	-0.308674	-0.561238	-0.743341	0.30981	-0.620983	-0.58856	0.116585	-0.691191	-0.841003	1	Neuro system
RBP3	ENSMMUG00000011909	-0.325492	2.39371	1.33546	1.67297	-0.512649	-0.522462	-0.512541	-0.492896	-0.522462	-0.451696	-0.522462	-0.522462	-0.522462	-0.49456	1	Neuro system
-	ENSMMUG00000011907	0.208006	1.67082	0.903419	2.55032	-0.544992	-0.544992	-0.528502	-0.528611	-0.544992	-0.525388	-0.534658	-0.513635	-0.544992	-0.521803	1	Neuro system
-	ENSMMUG00000056782	-0.2026	2.69255	1.1453	1.37001	-0.429627	-0.519984	-0.519984	-0.519984	-0.519984	-0.519984	-0.519984	-0.415762	-0.519984	-0.519984	1	Neuro system
-	ENSMMUG00000053893	1.81997	0.450874	-1.32021	1.33566	-0.277229	0.388696	-0.687576	0.565233	1.38611	-0.944153	-0.329078	-0.598397	-1.06279	-0.727104	1	Neuro system
-	ENSMMUG00000060130	0.66145	0.0869684	-0.460768	3.29407	-0.288737	-0.460768	-0.460768	-0.460768	-0.125978	-0.460768	-0.460768	-0.06391	-0.460768	-0.338483	1	Neuro system
-	ENSMMUG00000057468	-0.494763	0.739049	-0.494763	3.20561	-0.058812	-0.324692	-0.494763	-0.494763	0.447907	-0.494763	-0.218577	-0.327148	-0.494763	-0.494763	1	Neuro system
SNCG	ENSMMUG00000011849	0.600445	1.76008	0.212604	2.60544	-0.492487	-0.546232	-0.528675	-0.424952	-0.561062	-0.426052	-0.567923	-0.514626	-0.560746	-0.555817	1	Neuro system
OPN4	ENSMMUG00000003607	-0.547777	2.0785	0.281431	2.45282	0.112105	-0.161633	-0.381002	-0.547777	-0.547777	-0.547777	-0.547777	-0.547777	-0.547777	-0.547777	1	Neuro system
GRID1	ENSMMUG00000023612	0.0896186	1.88669	2.07571	1.43308	-0.592253	-0.546132	-0.599897	-0.36059	-0.609297	-0.465832	-0.636929	-0.547499	-0.600854	-0.52581	1	Neuro system
MIR346	ENSMMUG00000026883	-0.318504	1.87046	0.85766	2.04702	-0.611926	-0.611926	-0.611926	-0.611926	-0.611926	-0.611926	-0.611926	-0.611926	-0.611926	1.0507	1	Neuro system
-	ENSMMUG00000055728	-0.342208	-0.290267	0.160826	3.4228	-0.430803	-0.120856	-0.341559	-0.0318423	-0.144473	-0.351229	-0.346914	-0.430803	-0.321862	-0.430803	1	Neuro system
CDHR1	ENSMMUG00000000658	-0.46088	2.58106	0.87555	1.75859	-0.460981	-0.489066	-0.460673	-0.489066	-0.489066	-0.489066	-0.489066	-0.489066	-0.489066	-0.409211	1	Neuro system
NRG3	ENSMMUG00000017380	0.739278	2.41556	1.35372	0.989461	-0.395645	-0.504552	-0.790952	-0.720058	-0.717685	-0.790952	0.139243	-0.313274	-0.639956	-0.764191	1	Neuro system
-	ENSMMUG00000055918	2.11062	-0.679579	-0.106568	2.39293	-0.152684	-0.359396	-0.734352	0.123012	-0.0793411	-0.0428323	-0.588452	-0.464076	-0.533397	-0.885888	1	Neuro system
Metazoa_SRP	ENSMMUG00000065324	2.99493	0.730517	-0.502261	0.906225	-0.502261	-0.502261	-0.502261	-0.502261	-0.502261	-0.502261	-0.502261	0.390938	-0.502261	-0.502261	1	Neuro system
-	ENSMMUG00000049411	-0.34033	-0.321363	0.431004	3.2148	-0.34151	0.291325	-0.670108	-0.422599	-0.030624	-0.0777097	-0.670108	0.277443	-0.670108	-0.670108	1	Neuro system
Metazoa_SRP	ENSMMUG00000053038	2.58923	-0.483495	-0.483495	1.37281	-0.483495	-0.483495	-0.483495	-0.483495	-0.483495	1.35641	-0.483495	-0.483495	-0.483495	-0.483495	1	Neuro system
Metazoa_SRP	ENSMMUG00000059113	-0.485978	2.34853	-0.485978	1.94291	-0.485978	-0.485978	-0.485978	-0.485978	-0.485978	-0.485978	-0.485978	1.05431	-0.485978	-0.485978	1	Neuro system
DYDC2	ENSMMUG00000021774	3.4563	-0.223907	-0.323846	-0.152571	-0.323846	-0.323846	-0.323846	-0.323846	-0.323846	-0.323846	-0.323846	-0.323846	0.0247731	-0.189975	1	Neuro system
-	ENSMMUG00000003014	-0.955238	1.30018	-0.955238	0.977424	2.01994	-0.457813	-0.955238	1.28574	-0.403812	-0.189002	-0.551342	0.27037	-0.43073	-0.955238	1	Neuro system
ZCCHC24	ENSMMUG00000051972	2.22058	2.07256	0.0580424	0.616594	-0.273001	-0.459791	-0.00182607	-0.0714268	-0.889816	-0.499267	-0.71528	-0.462081	-0.624065	-0.971224	1	Neuro system
Metazoa_SRP	ENSMMUG00000047576	-0.0105042	-0.138417	-0.073035	2.40219	-0.583383	-0.654505	-0.614031	2.13015	0.235429	-0.481627	-0.559572	-0.490834	-0.631924	-0.529937	1	Neuro system
Metazoa_SRP	ENSMMUG00000041669	-0.589689	-0.240145	-0.903173	3.07386	-0.59081	-0.537601	0.0441673	0.508506	-0.0926559	0.223084	-0.0126697	0.538001	-0.517697	-0.903173	1	Neuro system
-	ENSMMUG00000059732	0.589054	-0.49695	0.291364	3.26893	-0.245385	-0.489986	-0.30646	-0.564736	0.0153196	-0.44959	-0.443346	-0.196381	-0.407096	-0.564736	1	Neuro system
-	ENSMMUG00000057557	2.19939	-0.332582	-0.376693	2.41599	-0.540564	-0.357273	-0.53791	-0.143594	0.161091	-0.564484	-0.61026	-0.293465	-0.408932	-0.610717	1	Neuro system
-	ENSMMUG00000060847	-0.407685	0.231778	1.13831	2.06367	-0.818878	-0.618528	-0.543876	0.589924	1.64955	-0.459375	-1.09974	-0.261587	-0.379863	-1.0837	1	Neuro system
COMTD1	ENSMMUG00000008694	-1.0224	0.0269349	0.41865	2.08908	0.646548	-0.393606	-0.419286	-0.926052	-0.567457	-0.216422	-1.00104	1.40578	1.08872	-1.12945	1	Neuro system
SAMD8	ENSMMUG00000008690	1.33449	1.65844	1.18282	0.537897	-0.399913	0.105552	0.88943	-1.04128	-0.724567	-0.076857	-1.44239	-0.0221279	-0.756745	-1.24474	1	Neuro system
Metazoa_SRP	ENSMMUG00000052066	-0.385014	0.0496261	0.894656	1.73154	0.282872	-0.816747	1.09837	1.30497	-0.862495	-1.12889	-0.563273	0.204579	-0.0749251	-1.73527	1	Neuro system
-	ENSMMUG00000053916	0.616548	-0.0289721	0.707014	1.23409	-1.025	-0.732306	0.651615	-1.20292	2.12638	-0.00120412	0.0309314	-0.64857	-0.271235	-1.45637	1	Neuro system
-	ENSMMUG00000060115	-0.0554424	-0.442835	0.18567	3.38162	-0.379942	-0.427203	-0.395706	-0.406014	0.0560138	-0.174995	0.00105036	-0.284933	-0.462298	-0.594989	1	Neuro system
Metazoa_SRP	ENSMMUG00000061207	-0.401155	0.0360264	0.289014	3.34504	-0.401155	-0.401155	-0.401155	-0.401155	-0.401155	0.341467	-0.401155	-0.401155	-0.401155	-0.401155	1	Neuro system
Metazoa_SRP	ENSMMUG00000059951	-0.998656	0.0196808	-0.462781	1.71613	-0.785432	-0.873883	-0.890878	1.89225	-0.168747	0.346749	-0.593408	0.108086	-0.735524	1.42641	1	Neuro system
CHST3	ENSMMUG00000052336	-0.709169	0.367937	-0.329656	2.00026	-0.510849	-0.590195	-0.169211	2.4059	-0.649801	-0.314854	-0.724765	-0.732827	0.325826	-0.368593	1	Neuro system
C10orf105	ENSMMUG00000063575	-0.187925	0.254424	0.985088	3.1657	-0.480562	-0.480562	-0.480562	-0.0962036	-0.480562	-0.414852	-0.445926	-0.480562	-0.480562	-0.376927	1	Neuro system
UNC5B	ENSMMUG00000005998	-0.677043	1.21735	0.735261	2.38002	-0.583582	-0.772912	-0.862887	1.08391	-0.283888	-0.100009	-0.833988	-0.745786	0.221802	-0.778245	1	Neuro system
PALD1	ENSMMUG00000021618	-0.578701	1.01222	-0.214013	1.6266	-0.47223	-0.580493	-0.606314	2.53264	-0.417224	-0.564261	-0.773731	-0.0130111	-0.653319	-0.298164	1	Neuro system
Metazoa_SRP	ENSMMUG00000058163	0.054691	-0.463093	-0.463093	3.29056	-0.205127	-0.463093	-0.463093	-0.0744793	-0.463093	0.00196931	-0.463093	-0.463093	-0.463093	0.63713	1	Neuro system
NODAL	ENSMMUG00000023171	-0.568593	1.39616	-0.568593	2.79859	-0.568593	-0.568593	-0.568593	-0.568593	-0.168291	-0.0123518	-0.568593	-0.212706	-0.568593	0.747335	1	Neuro system
NPFFR1	ENSMMUG00000005367	-0.25271	2.63352	-0.198134	2.0331	-0.455525	-0.347304	-0.536245	-0.536245	-0.431519	-0.317961	-0.38283	-0.350032	-0.436631	-0.421488	1	Neuro system
TYSND1	ENSMMUG00000006391	-1.15922	-0.16348	1.24523	1.97021	-0.683404	-1.04703	-1.13134	0.556159	0.0580427	1.12952	-0.992273	0.610306	-0.603313	0.210591	1	Neuro system
-	ENSMMUG00000056878	-0.523991	1.64722	1.07823	2.51874	-0.34757	-0.494466	-0.254199	-0.568319	-0.47197	-0.382485	-0.701683	-0.59957	-0.701683	-0.198254	1	Neuro system
Metazoa_SRP	ENSMMUG00000051912	-0.658195	1.78033	-0.658195	2.12789	-0.658195	-0.658195	-0.658195	0.495572	-0.658195	0.722543	0.797424	-0.658195	-0.658195	-0.658195	1	Neuro system
Metazoa_SRP	ENSMMUG00000061564	-0.0373707	-0.305778	-0.357319	3.43854	-0.107055	-0.33459	-0.397295	-0.260149	-0.392402	-0.0141794	-0.365862	-0.0795744	-0.372401	-0.414566	1	Neuro system
-	ENSMMUG00000052146	-0.821936	-0.240259	0.463655	2.56744	-0.383477	-0.693649	-0.821936	1.655	0.315775	-0.0314805	-0.613605	-0.0633279	-0.821936	-0.510265	1	Neuro system
-	ENSMMUG00000056119	-0.0330056	-0.394409	-0.236034	3.16956	0.489839	0.722043	-0.410286	-0.507345	-0.238207	-0.274339	-0.589153	-0.292655	-0.677071	-0.728934	1	Neuro system
-	ENSMMUG00000053199	-0.284751	-0.241184	-0.326319	3.31648	0.281231	0.534731	-0.312945	-0.343735	-0.479868	-0.339736	-0.477984	-0.346151	-0.480801	-0.498967	1	Neuro system
-	ENSMMUG00000062976	-0.610056	-0.332072	-0.171209	2.82008	1.59012	0.370881	-0.345265	-0.452225	-0.610056	-0.232296	-0.560275	-0.247516	-0.610056	-0.610056	1	Neuro system
-	ENSMMUG00000055397	-0.895464	-0.252433	-0.315385	2.41061	1.70118	0.624021	-0.19545	-0.765074	-0.109392	0.508909	-0.73096	-0.296446	-0.78865	-0.895464	1	Neuro system
-	ENSMMUG00000030530	-0.316363	0.231512	1.8694	2.13646	-0.785285	-0.161086	-0.309517	-1.25087	-0.646823	-0.411515	0.961313	-0.713844	-0.676309	0.0729313	1	Neuro system
-	ENSMMUG00000062079	-0.28084	1.28393	-0.11896	2.56825	0.0367694	-0.174148	-0.599541	-0.681985	1.15228	-0.0578567	-0.770946	-0.73845	-0.922947	-0.695548	1	Neuro system
-	ENSMMUG00000055282	0.563043	-0.596241	-0.0506574	3.17157	-0.698896	-0.24609	-0.405546	-0.407473	0.556012	-0.175767	0.0364369	-0.587329	-0.460166	-0.698896	1	Neuro system
-	ENSMMUG00000059754	-0.340225	1.74707	-0.557023	1.47943	2.11481	0.101293	-0.712327	-0.153777	-0.652197	-0.712327	-0.712327	-0.498494	-0.655133	-0.448771	1	Neuro system
-	ENSMMUG00000056153	-0.414978	0.635538	-0.414978	3.18576	-0.414978	0.743463	-0.414978	-0.414978	-0.414978	-0.414978	-0.414978	-0.414978	-0.414978	-0.414978	1	Neuro system
-	ENSMMUG00000056283	-0.430704	3.2842	0.259252	-0.430704	0.392895	-0.430704	-0.430704	-0.430704	0.370697	-0.430704	-0.430704	-0.430704	-0.430704	-0.430704	1	Neuro system
-	ENSMMUG00000064185	-0.501144	1.36346	0.73635	2.71044	-0.647414	-0.647414	-0.647414	-0.647414	-0.647414	-0.55983	0.22976	0.19314	-0.287692	-0.647414	1	Neuro system
-	ENSMMUG00000058942	0.999729	-0.372589	-0.220556	3.09667	-0.571301	0.282006	-0.451602	-0.715796	-0.201643	-0.176283	-0.142289	-0.134698	-0.588558	-0.803091	1	Neuro system
-	ENSMMUG00000063840	-0.307355	-0.221538	0.0127231	3.18943	-0.308496	-0.328752	-0.562091	-0.339052	1.02322	-0.397141	-0.263886	-0.479704	-0.391001	-0.626359	1	Neuro system
FGFBP3	ENSMMUG00000059608	0.591417	0.884774	1.8599	2.06477	-0.687549	-0.823218	-0.780843	0.198237	-0.158652	-0.162083	-0.934242	-0.776591	-0.68348	-0.59244	1	Neuro system
TBC1D12	ENSMMUG00000055733	-0.503086	0.283935	0.487566	3.13533	-0.341783	-0.587883	-0.613612	0.561705	-0.0691557	-0.458855	-0.773509	-0.0463864	-0.377444	-0.696821	1	Neuro system
Metazoa_SRP	ENSMMUG00000058861	-0.812691	-0.224824	-0.348665	3.04933	-0.258785	-0.380517	-0.626036	0.160815	-0.0940543	-0.146968	-0.724963	1.10401	-0.0152085	-0.681447	1	Neuro system
Metazoa_SRP	ENSMMUG00000058119	0.39756	-0.323748	-0.336563	3.34391	0.0739133	-0.298811	-0.566484	-0.153029	-0.388445	-0.236624	-0.392609	0.0138947	-0.566484	-0.566484	1	Neuro system
-	ENSMMUG00000050068	0.855827	-0.320433	0.0401402	3.23613	-0.408829	-0.48757	-0.328365	-0.48757	0.0232202	-0.48757	-0.263091	-0.396747	-0.48757	-0.48757	1	Neuro system
Metazoa_SRP	ENSMMUG00000056679	-0.972065	0.917576	-0.442725	1.62035	1.6106	1.18743	-0.825569	0.133119	-0.791708	-0.991619	-0.936803	0.325765	0.193748	-1.02809	1	Neuro system
OPALIN	ENSMMUG00000050856	2.16636	1.88342	-0.0853113	1.37777	-0.535773	-0.535773	-0.535773	-0.529903	-0.535773	-0.535773	-0.535773	-0.535773	-0.526156	-0.535773	1	Neuro system
SLIT1	ENSMMUG00000010428	1.36175	1.34774	-0.292544	2.59332	-0.525718	-0.524273	-0.436995	-0.50438	-0.519526	-0.50871	-0.531515	-0.475485	-0.509772	-0.473893	1	Neuro system
FRAT2	ENSMMUG00000019633	0.692663	-0.231328	-0.00729469	0.720909	-0.218129	-0.672213	-0.725105	2.96545	-0.796748	-0.510175	-0.57743	0.499449	-0.573193	-0.566853	1	Neuro system
UBTD1	ENSMMUG00000063092	-0.907052	-0.457064	-0.276588	2.74384	0.72993	-0.689044	0.534407	0.440898	-0.864052	0.810408	-0.876722	-0.165409	-0.787883	-0.235666	1	Neuro system
CRTAC1	ENSMMUG00000018154	0.321008	0.883558	1.35063	2.7279	-0.550577	-0.546569	-0.354058	-0.593993	-0.40999	-0.588775	-0.591243	-0.523884	-0.554703	-0.569304	1	Neuro system
-	ENSMMUG00000059304	-0.322614	-0.17627	-0.0638334	3.44175	-0.40894	-0.419417	-0.234705	-0.204132	-0.0776468	-0.378761	-0.250301	-0.0744836	-0.335992	-0.494651	1	Neuro system
-	ENSMMUG00000056041	-0.755221	-0.790531	-0.355978	2.47703	0.222144	1.1144	-0.195154	-0.733748	1.06007	-0.312662	0.690361	-0.778778	-0.716021	-0.925914	1	Neuro system
SCD	ENSMMUG00000058462	0.064615	3.10114	0.617029	0.362185	-0.611147	-0.614884	-0.603803	0.558804	-0.559313	-0.456581	-0.271162	-0.508488	-0.496985	-0.581411	1	Neuro system
Metazoa_SRP	ENSMMUG00000054574	-0.678306	0.323309	0.902922	2.75482	-0.678306	0.42621	0.275772	0.743414	-0.678306	-0.678306	-0.678306	-0.678306	-0.678306	-0.678306	1	Neuro system
Metazoa_SRP	ENSMMUG00000052466	-0.338975	-0.451426	0.552639	2.96451	-0.213725	-0.720178	-0.208184	1.18719	-0.391643	-0.26366	-0.720178	-0.136012	-0.720178	-0.540177	1	Neuro system
LZTS2	ENSMMUG00000010674	-0.818869	0.831317	0.702005	2.75165	-0.14821	-0.760045	-0.643702	-0.0624926	-0.641719	0.328096	-1.05334	0.349998	0.0602918	-0.894979	1	Neuro system
Metazoa_SRP	ENSMMUG00000054926	-0.418664	0.122722	-0.418664	3.29264	0.601558	-0.418664	-0.418664	-0.418664	-0.418664	-0.418664	-0.418664	0.169722	-0.418664	-0.418664	1	Neuro system
Metazoa_SRP	ENSMMUG00000055534	2.38141	-0.0920439	-0.0540296	2.08137	-0.702977	-0.81679	-0.471615	-0.302428	-0.521468	0.209123	-0.60048	0.102151	-0.395432	-0.81679	1	Neuro system
-	ENSMMUG00000062359	-0.773913	0.350324	0.529706	1.81331	-0.555913	-0.675427	-0.167321	0.508775	0.704194	1.04693	-1.1495	1.05672	-1.43124	-1.25664	1	Neuro system
HPS6	ENSMMUG00000009374	-0.715777	-0.658076	0.760684	1.76428	-0.401056	-1.1277	-1.20443	1.29881	-0.129115	1.47954	-1.20555	-0.0756597	-0.12259	0.336655	1	Neuro system
-	ENSMMUG00000003000	-1.0108	0.482235	1.40465	1.34517	0.586692	-0.698202	-0.030287	1.49677	0.474683	-0.249072	-0.776356	-0.559605	-0.664259	-1.80161	1	Neuro system
TRIM8	ENSMMUG00000004394	-0.68985	0.238089	1.03485	2.43496	-0.339726	-0.734012	-0.746918	0.736283	0.00433957	0.802974	-1.06722	-0.394874	0.0518754	-1.33077	1	Neuro system
Metazoa_SRP	ENSMMUG00000055456	-0.375633	-0.375633	1.4963	3.01129	-0.375633	-0.375633	-0.375633	-0.375633	-0.375633	-0.375633	-0.375633	-0.375633	-0.375633	-0.375633	1	Neuro system
INA	ENSMMUG00000008872	0.653611	0.795234	1.36173	2.66268	-0.553723	-0.550681	-0.553723	-0.553071	-0.550913	-0.545133	-0.553723	-0.529239	-0.544101	-0.538942	1	Neuro system
PCGF6	ENSMMUG00000008873	-0.815711	-0.770934	0.260028	1.92375	-0.477174	-0.722668	-0.454496	2.28553	0.418635	-0.0279171	-0.66048	-0.794903	-0.598632	0.434975	1	Neuro system
SH3PXD2A	ENSMMUG00000007067	0.552592	1.71675	0.958554	0.586268	-0.129211	-1.0367	-0.90299	1.26009	-0.190115	0.607607	-1.46343	-0.262313	-0.165062	-1.53205	1	Neuro system
SORCS3	ENSMMUG00000003610	0.533395	-0.00803367	1.69768	2.53109	-0.541026	-0.179124	-0.75937	-0.219508	-0.676206	-0.827981	-0.802081	-0.219315	-0.766177	0.236657	1	Neuro system
-	ENSMMUG00000063986	-0.766496	-0.583501	1.92224	2.22459	-0.32329	-0.351567	-0.737965	0.165371	-0.207398	-0.112772	-1.03014	0.904215	-0.345517	-0.757772	1	Neuro system
Metazoa_SRP	ENSMMUG00000051414	-0.372595	-0.372595	-0.372595	3.05366	-0.372595	-0.372595	-0.372595	-0.372595	-0.372595	-0.372595	1.41749	-0.372595	-0.372595	-0.372595	1	Neuro system
-	ENSMMUG00000056056	-1.0374	-0.459281	0.75917	2.05204	-0.28368	-0.671068	-0.977797	0.688047	0.0454907	0.947619	-1.33031	1.25753	-0.160689	-0.82967	1	Neuro system
-	ENSMMUG00000053733	-0.279033	0.137086	1.13422	1.15513	-0.193167	-0.161098	-0.839851	2.65135	-0.606486	-0.298178	-0.792782	-0.342998	-0.952438	-0.611761	1	Neuro system
VAX1	ENSMMUG00000059146	1.53996	1.66865	1.17016	1.33003	-0.697671	-0.697671	-0.697671	-0.697671	-0.697671	-0.697671	-0.697671	-0.697671	-0.697671	0.570239	1	Neuro system
SLC18A2	ENSMMUG00000014817	-0.463524	3.37069	-0.338195	-0.295093	-0.455087	-0.46069	-0.454808	0.0443146	-0.215964	-0.434619	-0.456354	-0.0688819	0.358419	-0.13021	1	Neuro system
PRLHR	ENSMMUG00000052816	-0.353237	2.21091	1.9549	1.25652	-0.520654	-0.520654	-0.520654	-0.520654	-0.520654	-0.520654	-0.520654	-0.383214	-0.520654	-0.520654	1	Neuro system
NANOS1	ENSMMUG00000048654	-0.334038	1.22371	0.316261	3.03842	-0.528851	-0.577337	-0.136191	-0.504295	-0.514432	-0.489927	-0.531261	-0.40956	-0.457668	-0.0948249	1	Neuro system
-	ENSMMUG00000054942	0.580048	-0.739476	0.995674	1.52782	-0.119537	-0.135111	-0.409637	-0.496875	1.42346	-0.116668	-1.57202	0.988958	-0.256626	-1.67	1	Neuro system
Metazoa_SRP	ENSMMUG00000045006	-0.498336	1.84819	1.11642	0.889248	-0.725984	-0.674709	-0.760729	1.5237	-0.490016	0.872322	-0.812459	-0.679795	-0.794828	-0.813027	1	Neuro system
-	ENSMMUG00000065302	0.651354	0.236441	0.679815	3.06855	-0.0544273	-0.390681	-0.676465	-0.755178	-0.553144	-0.193704	-0.459216	-0.485752	-0.755178	-0.312409	1	Neuro system
PLPP4	ENSMMUG00000008724	-0.218194	2.24625	1.88463	1.18443	-0.649814	-0.649814	-0.649814	-0.649814	-0.226519	-0.462662	-0.607535	-0.632708	-0.466799	-0.101641	1	Neuro system
-	ENSMMUG00000064557	0.00622471	-0.316275	0.058438	3.41278	-0.302413	-0.276267	-0.455906	-0.455906	0.0846196	-0.21872	-0.455906	-0.304153	-0.320606	-0.455906	1	Neuro system
HMX3	ENSMMUG00000003090	-0.451932	-0.451932	-0.451932	2.86768	-0.451932	-0.451932	-0.451932	-0.451932	-0.0214089	-0.451932	-0.451932	1.65322	-0.451932	0.0198266	1	Neuro system
GPR26	ENSMMUG00000053995	0.272289	2.55097	-0.432047	2.05303	-0.420844	-0.489885	-0.472436	-0.489885	-0.489885	-0.458768	-0.457081	-0.27089	-0.404684	-0.489885	1	Neuro system
LHPP	ENSMMUG00000015215	0.408349	0.872355	0.983832	2.6279	-0.864289	-1.04385	-0.500579	-0.503675	-0.681166	-0.202576	0.443485	-0.147992	-0.408291	-0.983498	1	Neuro system
Metazoa_SRP	ENSMMUG00000052984	2.19992	-0.753991	-0.551847	0.692684	-0.774171	-0.332895	-0.105085	0.880032	-1.10331	1.2702	-0.477754	0.794922	-1.10331	-0.635384	1	Neuro system
C9H10orf90	ENSMMUG00000009663	0.0350029	2.93725	0.663685	1.23844	-0.50459	-0.515675	-0.515675	-0.515675	-0.393431	-0.495691	-0.515675	-0.502889	-0.399398	-0.515675	1	Neuro system
-	ENSMMUG00000063244	-0.0568155	2.00154	0.101654	1.92994	-0.294761	-0.368977	-1.22393	-0.757613	0.958208	-0.19963	-1.01671	-0.384722	-0.884508	0.196327	1	Neuro system
-	ENSMMUG00000054130	-0.773965	0.245795	-0.237341	1.55625	-0.773965	-0.773965	2.14012	1.156	-0.773965	-0.773965	-0.773965	-0.0351063	-0.773965	0.592038	1	Neuro system
TCERG1L	ENSMMUG00000010593	1.93403	0.92907	0.569279	2.1182	-0.632558	-0.627551	0.110662	-0.661952	-0.661952	-0.60896	-0.55022	-0.594143	-0.661952	-0.661952	1	Neuro system
JAKMIP3	ENSMMUG00000022358	0.0871185	1.26728	2.21611	1.86301	-0.579897	-0.584387	-0.599023	-0.420532	-0.586656	-0.394374	-0.561249	-0.514497	-0.602492	-0.590415	1	Neuro system
DPYSL4	ENSMMUG00000022363	0.462251	0.896938	1.5236	2.17543	-0.7356	-0.783191	-0.780737	-0.0898733	-0.753576	0.793969	-0.839424	-0.704762	-0.779536	-0.385484	1	Neuro system
STK32C	ENSMMUG00000022364	2.11596	0.264665	0.18319	2.04779	-0.693688	-0.741835	-0.808335	0.775818	-0.598168	-0.250012	-0.741973	-0.214029	-0.781916	-0.557475	1	Neuro system
LRRC27	ENSMMUG00000022366	-0.101861	0.0399995	0.766984	1.53277	-0.402029	-1.23939	-0.607012	1.69029	-0.108715	1.20123	-1.09526	-0.639967	0.354838	-1.39187	1	Neuro system
CFAP46	ENSMMUG00000057584	1.91678	-0.325482	-0.263531	0.363997	-0.457114	-0.492147	-0.707489	2.54828	-0.41836	0.0958795	-0.743705	-0.702384	-0.478451	-0.336269	1	Neuro system
ADGRA1	ENSMMUG00000006087	0.933601	1.28803	0.323938	2.71958	-0.54775	-0.608888	-0.610133	-0.429817	-0.597765	-0.519487	-0.610606	-0.582	-0.618027	-0.140683	1	Neuro system
-	ENSMMUG00000058183	1.27195	1.94935	0.751457	1.84269	-0.665762	-0.665762	-0.498456	-0.582658	-0.618048	-0.665762	-0.665762	-0.644552	-0.665762	-0.142921	1	Neuro system
-	ENSMMUG00000006089	0.865807	0.557722	1.17392	2.76754	-0.545067	-0.556754	-0.558897	-0.569244	-0.52715	-0.524027	-0.571972	-0.565042	-0.548601	-0.398237	1	Neuro system
-	ENSMMUG00000065350	-0.305398	-0.0117035	-0.152103	3.15769	-0.430439	-0.430439	-0.430439	-0.430439	-0.430439	-0.430439	-0.430439	-0.430439	-0.379187	1.13421	1	Neuro system
CALY	ENSMMUG00000023038	0.657285	0.358308	-0.09283	3.2667	-0.429327	-0.429446	-0.434139	-0.425682	-0.434139	-0.370521	-0.434139	-0.415637	-0.43018	-0.386251	1	Neuro system
-	ENSMMUG00000051844	-0.270247	0.784096	0.437431	3.0669	-0.313956	-0.644329	-0.480428	-0.0580633	-0.584224	0.447329	-0.613517	-0.547703	-0.589569	-0.633725	1	Neuro system
WNK1	ENSMMUG00000018650	1.63186	1.66474	0.849436	0.893119	-0.600485	-0.971602	-0.458026	-0.371302	0.144769	0.471131	-0.956971	-0.142028	-0.408704	-1.74594	1	Neuro system
Metazoa_SRP	ENSMMUG00000053783	-0.719406	-0.522566	-0.306504	3.26331	-0.544135	-0.0724764	-0.184634	-0.630951	0.245133	-0.261706	-0.0601526	0.118527	-0.678864	0.354425	1	Neuro system
Metazoa_SRP	ENSMMUG00000057865	-0.882734	0.272539	0.863462	1.71881	-0.538735	-0.941147	0.176377	0.59946	0.723257	1.37525	-0.764059	0.048061	-0.896911	-1.75363	1	Neuro system
LRTM2	ENSMMUG00000063445	1.83514	1.32823	0.148992	2.19363	-0.557604	-0.557604	-0.546235	-0.557604	-0.557604	-0.506917	-0.557604	-0.557604	-0.557604	-0.54961	1	Neuro system
DYRK4	ENSMMUG00000020811	2.92516	-0.0232166	-0.279043	1.10377	-0.665494	-0.902826	-0.659234	-0.806678	0.0613571	0.309521	-0.558015	0.247187	-0.53158	-0.22091	1	Neuro system
KCNA6	ENSMMUG00000063966	0.682786	2.08169	0.79897	2.07576	-0.603087	-0.532877	-0.579915	-0.608683	-0.611053	-0.31916	-0.625763	-0.599607	-0.597779	-0.561288	1	Neuro system
-	ENSMMUG00000053122	0.767932	2.55351	1.29481	0.975067	-0.588289	-0.482958	-0.519938	-0.614872	-0.585753	-0.245187	-0.655177	-0.624317	-0.638668	-0.636159	1	Neuro system
VAMP1	ENSMMUG00000053354	-0.712588	2.37177	1.10063	1.55086	-0.713652	-0.923341	-0.111091	-0.563531	-0.721641	-0.0749034	-0.587547	0.357531	-0.278475	-0.694016	1	Neuro system
Metazoa_SRP	ENSMMUG00000058766	-0.465667	-0.465667	-0.465667	3.03774	0.0158694	-0.465667	-0.465667	-0.465667	-0.465667	0.402448	-0.465667	1.20061	-0.465667	-0.465667	1	Neuro system
PTMS	ENSMMUG00000050151	2.17218	-0.207988	1.046	1.46266	-0.240136	-0.90322	-0.905141	0.61513	-0.663103	-0.612886	0.535529	-0.550625	-0.872184	-0.876211	1	Neuro system
USP5	ENSMMUG00000005192	-0.319705	0.935278	1.47456	1.59033	-0.264261	-0.950351	0.327305	0.0438715	-0.562743	1.04014	-1.09101	0.270341	-0.764105	-1.72965	1	Neuro system
A2ML1	ENSMMUG00000022680	-0.382233	3.30623	0.364619	0.375346	-0.447058	-0.447058	-0.381758	-0.447058	-0.426107	-0.447058	-0.416367	-0.447058	0.150782	-0.355228	1	Neuro system
RIMKLB	ENSMMUG00000022676	-0.999784	0.574914	0.434844	2.33945	0.375072	0.237862	-0.806818	0.922809	0.914468	-0.581419	-1.23748	-0.660258	-0.654792	-0.858865	1	Neuro system
Metazoa_SRP	ENSMMUG00000050087	0.233419	0.272285	0.685818	3.23179	-0.442331	-0.442331	-0.442331	-0.442331	-0.442331	-0.442331	-0.442331	-0.442331	-0.442331	-0.442331	1	Neuro system
-	ENSMMUG00000052134	2.62076	1.22742	-0.13053	-0.0769006	-0.38314	-0.757118	-0.379048	-0.193738	1.18367	-0.0829089	-0.757118	-0.757118	-0.757118	-0.757118	1	Neuro system
-	ENSMMUG00000053021	1.65235	-0.321268	0.166945	2.55375	-0.654005	-0.690236	-0.051491	0.723984	-0.277454	-0.416059	-0.457495	-0.693993	-0.58463	-0.950398	1	Neuro system
-	ENSMMUG00000048811	0.989362	-0.406848	-1.05563	2.0947	-1.05563	-0.697913	-0.746635	1.4001	-0.659079	1.14849	0.106198	-0.233007	-0.552705	-0.331408	1	Neuro system
-	ENSMMUG00000055308	0.493707	-0.0879078	-0.530113	2.31104	-1.0441	-0.723556	-0.913652	0.174381	-0.343663	1.35974	-0.443905	-0.582785	-0.856687	1.1875	1	Neuro system
-	ENSMMUG00000064931	0.459504	0.0309242	0.194612	3.24182	-0.0881315	-0.479522	-0.519931	-0.61254	-0.165407	-0.449768	-0.604135	0.142765	-0.373987	-0.776206	1	Neuro system
-	ENSMMUG00000041623	1.01056	-0.751119	-0.938497	1.30939	-0.408837	-0.525241	-0.224558	-0.672528	-0.0222585	0.971247	-0.602944	-0.531208	-0.938497	2.32449	1	Neuro system
MANSC1	ENSMMUG00000018577	-0.623499	0.106804	1.37611	1.60939	-0.0834685	-0.412167	-1.24725	-0.331069	0.373941	-0.177626	-0.426413	-0.497508	1.84236	-1.50961	1	Neuro system
GRIN2B	ENSMMUG00000019112	1.36352	2.31125	1.32595	0.672063	-0.563103	-0.0153537	-0.685527	-0.637933	-0.670156	-0.493298	-0.66301	-0.612644	-0.685527	-0.646226	1	Neuro system
Metazoa_SRP	ENSMMUG00000060333	-0.267261	3.4744	-0.267261	-0.267261	-0.267261	-0.267261	-0.267261	-0.267261	-0.267261	-0.267261	-0.267261	-0.267261	-0.267261	-0.267261	1	Neuro system
Metazoa_SRP	ENSMMUG00000050605	0.0239356	-0.234823	0.611185	2.85622	0.603493	-0.17129	-0.853243	-0.853243	-0.47525	-0.328001	-0.299516	0.827024	-0.853243	-0.853243	1	Neuro system
LMO3	ENSMMUG00000040307	2.31336	1.61134	0.964921	-0.377891	-0.70199	-0.658656	-0.659531	0.819389	-0.293917	-0.666845	-0.687373	-0.515247	-0.479847	-0.667703	1	Neuro system
-	ENSMMUG00000041726	-0.982639	0.303965	0.257052	1.9126	-0.626079	-1.06257	-0.738835	0.455153	-0.103723	-0.481603	-0.888361	-0.791429	0.866251	1.88022	1	Neuro system
BHLHE41	ENSMMUG00000039562	-0.274297	1.26306	1.75007	2.05914	-0.602049	-0.688571	0.699345	-0.383422	-0.722448	-0.357632	-0.777053	-0.597349	-0.626512	-0.742277	1	Neuro system
KLHL42	ENSMMUG00000021742	-0.0567415	0.704474	1.38674	1.57499	-0.954501	-1.015	-1.35761	0.0744321	-0.0133933	0.950178	-0.893989	0.994844	-0.130295	-1.26413	1	Neuro system
PTHLH	ENSMMUG00000010531	0.388317	0.29548	0.569266	2.73615	-0.41637	-0.699995	-0.302715	-0.467632	-0.949638	1.06925	-0.949638	0.0345154	-0.357359	-0.949638	1	Neuro system
Metazoa_SRP	ENSMMUG00000050795	-0.535602	0.651741	1.33883	2.85584	-0.162685	-0.535602	-0.535602	-0.535602	-0.535602	0.136695	-0.535602	-0.535602	-0.535602	-0.535602	1	Neuro system
Metazoa_SRP	ENSMMUG00000050572	-0.421879	-0.211212	-0.0893038	3.18852	-0.421879	-0.421879	-0.421879	1.07325	-0.16435	-0.421879	-0.421879	-0.421879	-0.421879	-0.421879	1	Neuro system
-	ENSMMUG00000015343	-0.993245	0.717122	-0.746472	1.75572	0.597023	-0.215573	-0.3717	-1.17742	-0.408813	-0.478986	-0.198418	0.897604	1.81096	-1.1878	1	Neuro system
SYT10	ENSMMUG00000010712	-0.527459	2.90233	-0.553378	0.807979	-0.547554	-0.592847	-0.684294	-0.242882	0.608236	-0.613861	-0.0717088	0.780269	-0.636081	-0.628752	1	Neuro system
-	ENSMMUG00000060125	-0.516645	-0.433267	-0.385018	2.76989	-0.438083	-0.148869	-0.516645	-0.398296	1.72571	0.33314	-0.441989	-0.516645	-0.516645	-0.516645	1	Neuro system
-	ENSMMUG00000051924	-0.502564	-0.253479	1.33436	2.98554	-0.503488	-0.373533	-0.612225	-0.0406265	-0.426916	-0.164165	-0.551241	0.214839	-0.397831	-0.708671	1	Neuro system
SLC2A13	ENSMMUG00000010078	0.987942	-0.303605	-0.0224256	1.49141	-1.0635	-0.885139	-1.36617	-0.666093	1.72663	-0.705314	-0.301717	0.223252	1.3001	-0.415366	1	Neuro system
Metazoa_SRP	ENSMMUG00000053651	-0.696817	-0.696817	0.389514	2.05491	2.32893	-0.190936	-0.696817	-0.696817	0.144383	0.0824451	-0.696817	-0.19824	-0.430105	-0.696817	1	Neuro system
-	ENSMMUG00000058178	-0.114528	-0.289828	-0.25666	3.16446	-0.375118	-0.495364	-0.502906	-0.510345	0.729304	-0.483513	-0.400913	0.621384	-0.439236	-0.64674	1	Neuro system
DBX2	ENSMMUG00000052030	-0.067227	2.52491	0.203434	2.05174	-0.524125	-0.14939	-0.382167	-0.559135	-0.559135	-0.432901	-0.559135	-0.47837	-0.559135	-0.509362	1	Neuro system
-	ENSMMUG00000065020	-0.402776	-0.784969	-0.271794	2.84414	-0.534058	1.04678	0.386066	-0.532387	-0.0827599	-0.455678	0.0615879	0.570501	-0.922328	-0.922328	1	Neuro system
Metazoa_SRP	ENSMMUG00000049547	0.547656	-0.426053	-0.426053	3.10338	-0.426053	-0.426053	-0.426053	1.03555	-0.426053	-0.426053	-0.426053	-0.426053	-0.426053	-0.426053	1	Neuro system
RAPGEF3	ENSMMUG00000000477	-0.503729	0.787573	-0.0126924	2.48551	-0.279495	-0.49458	-0.823904	0.426784	1.10928	0.747023	-0.962172	-0.845766	-0.820261	-0.813572	1	Neuro system
SLC48A1	ENSMMUG00000049514	-1.00738	2.12278	0.852557	1.18922	-0.192707	-0.351195	0.480864	0.351218	0.0437113	0.489356	-1.10699	-0.658159	-0.620057	-1.59322	1	Neuro system
COL2A1	ENSMMUG00000011444	-0.65736	0.584478	1.81832	2.43558	-0.604235	-0.694174	-0.542329	-0.496606	-0.362911	-0.30889	-0.666895	-0.433026	-0.64353	0.571576	1	Neuro system
CCDC184	ENSMMUG00000052412	1.04932	1.43733	1.4123	2.06483	-0.610639	-0.621564	-0.489717	-0.628552	-0.543338	-0.596259	-0.617204	-0.607891	-0.628552	-0.620064	1	Neuro system
H1-7	ENSMMUG00000051724	-0.417545	1.08837	0.283746	2.49606	-0.419212	-0.883762	-0.414129	-0.533851	0.321651	1.20997	-0.883762	-0.0800116	-0.883762	-0.883762	1	Neuro system
WNT10B	ENSMMUG00000015705	2.24581	1.79325	0.273805	1.21033	-0.412067	-0.538312	-0.478435	-0.323771	-0.583671	-0.491268	-0.724362	-0.621063	-0.634045	-0.716206	1	Neuro system
WNT1	ENSMMUG00000015709	1.5241	0.456864	0.0447071	2.78851	-0.66152	-0.579301	-0.66152	-0.449858	-0.479231	-0.0282694	-0.66152	-0.256362	-0.574825	-0.461771	1	Neuro system
DDN	ENSMMUG00000058313	3.46555	-0.23759	-0.306249	-0.25544	-0.216094	-0.278225	-0.308153	-0.304729	-0.041263	-0.295859	-0.307613	-0.304876	-0.305348	-0.304114	1	Neuro system
DHH	ENSMMUG00000012776	-0.405671	2.94841	-0.466994	-0.294111	-0.344787	-0.347807	-0.432676	-0.334034	-0.343677	-0.344597	-0.428283	-0.404345	-0.399967	1.59854	1	Neuro system
PRPH	ENSMMUG00000031976	-0.301422	-0.179715	-0.268312	3.46162	-0.308502	-0.306851	-0.304223	-0.297874	-0.30301	-0.298327	-0.307161	0.00723893	-0.305019	-0.288442	1	Neuro system
Metazoa_SRP	ENSMMUG00000054363	0.679303	-0.832617	2.19632	1.90753	-0.531315	-0.832617	-0.223419	0.075179	-0.832617	0.253762	-0.832617	0.209992	-0.832617	-0.404267	1	Neuro system
Metazoa_SRP	ENSMMUG00000053522	0.0792988	-0.554982	0.116739	3.12379	0.291004	-0.280186	-0.67437	0.187768	0.610392	-0.395718	-0.78294	-0.287445	-0.650408	-0.78294	1	Neuro system
KCNH3	ENSMMUG00000011097	3.23695	-0.124353	-0.147715	-0.122967	-0.471018	-0.501199	-0.480139	-0.210524	-0.29934	0.904559	-0.529428	-0.37234	-0.494604	-0.38788	1	Neuro system
FAM186B	ENSMMUG00000022493	-0.997682	1.33831	1.0654	2.17384	0.00463077	-0.426024	-0.857718	-0.127452	-0.102497	0.992974	-0.706523	-0.647956	-1.00141	-0.707898	1	Neuro system
NCKAP5L	ENSMMUG00000006255	-0.808656	1.25433	1.72645	1.63582	0.0957451	-0.560452	-0.422701	0.717158	-0.822201	0.633723	-0.945182	-0.674599	-0.899951	-0.929485	1	Neuro system
FAIM2	ENSMMUG00000022913	0.422	1.54621	1.85686	1.91811	-0.586254	-0.575777	-0.588034	-0.594891	-0.52412	-0.565127	-0.595316	-0.551462	-0.55609	-0.606108	1	Neuro system
-	ENSMMUG00000051371	0.0539872	0.420704	-0.581769	3.23275	-0.633134	-0.486684	-0.709177	-0.250953	0.326739	0.0448263	-0.564651	-0.00748042	-0.568413	-0.276744	1	Neuro system
Metazoa_SRP	ENSMMUG00000055476	2.28814	-0.155647	-0.168207	2.36603	-0.308836	-0.521495	-0.499392	-0.3076	-0.430518	-0.42353	-0.565896	-0.0805638	-0.596242	-0.596242	1	Neuro system
Y_RNA	ENSMMUG00000027375	-0.702287	-0.0651711	-0.702287	2.57337	-0.101977	-0.702287	-0.702287	0.202053	0.855396	1.4622	-0.702287	-0.0098612	-0.702287	-0.702287	1	Neuro system
U6	ENSMMUG00000064528	-0.782073	1.41059	0.948682	1.09682	-0.782073	-0.782073	-0.782073	-0.782073	1.89835	-0.782073	-0.782073	0.409435	0.492714	-0.782073	1	Neuro system
Metazoa_SRP	ENSMMUG00000060310	-0.702929	-0.362694	-0.434368	3.08718	-0.222059	-0.609132	-0.621907	0.383684	-0.702929	0.452958	-0.474447	0.77616	-0.208408	-0.361111	1	Neuro system
-	ENSMMUG00000063862	0.375554	1.00957	-0.557599	2.44594	-0.254521	-0.823787	-0.734161	0.569762	0.118826	1.11525	-0.880106	-0.880106	-0.761335	-0.74328	1	Neuro system
ANKRD33	ENSMMUG00000004978	0.346562	2.23884	-0.182916	1.07599	-0.715105	-0.847279	-0.580038	0.74564	0.0101359	1.29729	-0.847279	-0.847279	-0.847279	-0.847279	1	Neuro system
SPRYD3	ENSMMUG00000000329	1.37503	0.628819	1.29117	1.37272	-0.372028	-0.797015	-1.2422	1.17734	-0.201681	0.12355	-1.06693	-0.504589	-0.434382	-1.34981	1	Neuro system
U6	ENSMMUG00000063627	-0.377351	2.98485	-0.377351	1.54336	-0.377351	-0.377351	-0.377351	-0.377351	-0.377351	-0.377351	-0.377351	-0.377351	-0.377351	-0.377351	1	Neuro system
Metazoa_SRP	ENSMMUG00000031851	0.951781	-0.464611	-0.464611	3.22548	-0.288195	-0.258144	-0.375438	-0.33173	-0.464611	-0.30559	-0.464611	0.0441041	-0.464611	-0.339209	1	Neuro system
ZNF385A	ENSMMUG00000016669	0.759177	1.40482	1.12324	2.34625	-0.580234	-0.694287	-0.49387	-0.462129	-0.708341	0.0574337	-0.702017	-0.674665	-0.622553	-0.75283	1	Neuro system
PDE1B	ENSMMUG00000000111	1.70833	0.384449	1.1738	0.362554	-1.08771	-1.00689	-0.585584	-0.423955	0.711521	0.88437	-0.895887	1.0309	-1.06998	-1.18592	1	Neuro system
Metazoa_SRP	ENSMMUG00000061820	0.980643	-0.0800668	0.168716	3.17396	-0.374956	-0.509983	-0.509983	-0.509983	-0.509983	-0.266556	-0.509983	-0.198491	-0.343351	-0.509983	1	Neuro system
MYL6B	ENSMMUG00000005214	0.913268	0.524461	1.71796	1.14059	-0.389067	-0.578463	1.67347	-0.564514	0.0453056	-0.866639	-0.983295	-0.914784	-0.871468	-0.846823	1	Neuro system
Metazoa_SRP	ENSMMUG00000057485	-0.483746	-0.483746	-0.483746	2.45558	-0.483746	-0.483746	-0.483746	-0.483746	-0.483746	-0.483746	1.05194	-0.483746	-0.483746	1.81369	1	Neuro system
Metazoa_SRP	ENSMMUG00000056460	0.137534	-0.547853	-0.610367	2.96966	0.553432	-0.353748	-0.420604	-0.212781	-0.663222	0.919665	-0.711749	0.284187	-0.49955	-0.844603	1	Neuro system
KIF5A	ENSMMUG00000011297	2.80008	0.579619	0.954958	1.0211	-0.541192	-0.532375	-0.529014	-0.537543	-0.54199	-0.542181	-0.542801	-0.515804	-0.535499	-0.537355	1	Neuro system
Metazoa_SRP	ENSMMUG00000062058	-0.975004	-0.595812	-0.0770706	2.59921	-0.796361	-0.347781	-0.975004	0.639703	-0.0479182	0.95735	-0.465716	1.08555	-0.534089	-0.467063	1	Neuro system
-	ENSMMUG00000057830	-0.640462	0.14808	-0.324901	2.57161	-0.327661	-0.605605	-0.638926	1.03916	1.31936	-0.850247	-0.35364	0.234748	-0.721266	-0.850247	1	Neuro system
-	ENSMMUG00000061646	-0.363251	-0.434996	-0.167617	3.30251	-0.275191	-0.453215	-0.36029	0.041544	0.219585	0.362056	-0.512304	-0.0447927	-0.546561	-0.767473	1	Neuro system
mml-let-7i	ENSMMUG00000026990	-0.698492	0.278266	1.22899	2.92843	-0.315021	-0.249698	-0.465892	-0.236347	-0.698492	-0.421963	-0.698492	-0.344641	-0.698492	0.391843	1	Neuro system
-	ENSMMUG00000049277	0.931328	-0.835021	0.387721	2.48349	-0.0274261	0.134728	-0.979347	0.249816	0.961398	-0.979347	-0.72089	-0.822491	0.195385	-0.979347	1	Neuro system
C11H12orf56	ENSMMUG00000020533	-0.688965	1.79075	-0.353953	1.45117	-0.730307	-0.809246	-0.80707	-0.247786	0.256752	2.00433	-0.824015	-0.168821	-0.350727	-0.522113	1	Neuro system
GRIP1	ENSMMUG00000016631	0.237395	1.54006	1.15261	1.12642	-0.946624	-0.932355	-1.13655	0.166465	1.56124	0.0716629	-1.15844	-0.845068	-0.56128	-0.275537	1	Neuro system
-	ENSMMUG00000050629	0.0498347	-0.42601	1.24446	2.61301	-0.610512	-0.582516	-0.387184	-0.527277	1.28633	-0.182282	-0.410444	-0.585294	-0.707256	-0.774862	1	Neuro system
KCNMB4	ENSMMUG00000014858	1.68328	0.887091	1.23473	2.04043	-0.515857	-0.637345	-0.695386	-0.150428	-0.645848	-0.467214	-0.726286	-0.59924	-0.696641	-0.711284	1	Neuro system
-	ENSMMUG00000050112	-0.0296564	-0.46712	0.850131	2.40693	-0.341309	1.38759	-0.802122	-0.261242	0.842162	-0.402111	-0.66497	-0.60233	-0.957975	-0.957975	1	Neuro system
KCNC2	ENSMMUG00000012362	2.42345	1.69928	0.290806	1.06777	-0.567189	-0.567189	-0.567189	-0.567189	-0.46117	-0.567189	-0.546481	-0.542054	-0.567189	-0.528464	1	Neuro system
Metazoa_SRP	ENSMMUG00000042476	0.62667	0.714574	0.629245	1.31427	-0.597126	-0.901708	-0.593793	2.31016	0.283785	-0.901708	-0.612267	-0.901708	-0.901708	-0.468695	1	Neuro system
-	ENSMMUG00000058640	-0.164658	-0.473018	0.207174	3.24311	-0.134726	-0.363211	-0.57693	-0.474093	0.118417	0.642339	-0.475548	-0.40371	-0.504253	-0.640894	1	Neuro system
OTOGL	ENSMMUG00000000121	-0.292944	3.45481	-0.240229	-0.326438	-0.303602	0.0833928	-0.313728	-0.329709	-0.236812	-0.307731	-0.345482	-0.248869	-0.30672	-0.285943	1	Neuro system
-	ENSMMUG00000059068	-0.191001	-0.282053	1.29074	2.96847	-0.193115	-0.7823	0.0515831	-0.693542	-0.476537	-0.0387708	-0.558342	0.0332114	-0.346045	-0.7823	1	Neuro system
-	ENSMMUG00000036360	0.22123	1.44455	-0.875888	1.11249	0.217307	-0.875888	-0.875888	0.770958	0.54242	-0.875888	-0.875888	-0.875888	1.82226	-0.875888	1	Neuro system
-	ENSMMUG00000063190	-1.13399	-0.38724	0.916242	1.47349	1.17523	0.177134	-1.036	1.29277	-0.111689	0.941118	-0.938295	-0.0912272	-1.04982	-1.22773	1	Neuro system
Y_RNA	ENSMMUG00000055071	-0.267261	-0.267261	-0.267261	3.4744	-0.267261	-0.267261	-0.267261	-0.267261	-0.267261	-0.267261	-0.267261	-0.267261	-0.267261	-0.267261	1	Neuro system
Metazoa_SRP	ENSMMUG00000058681	0.324248	-0.214209	1.85271	2.66636	-0.568076	-0.568076	-0.568076	-0.400647	-0.423881	-0.36771	-0.568076	-0.43988	-0.156608	-0.568076	1	Neuro system
-	ENSMMUG00000062511	-0.364735	-0.100599	0.312966	3.2674	-0.141884	-0.0271767	-0.588353	-0.138988	0.0583791	-0.00594832	-0.601967	-0.0385558	-0.815271	-0.815271	1	Neuro system
-	ENSMMUG00000054350	-0.33294	-0.474744	-0.186322	2.88799	-0.479204	-0.551944	-0.478408	-0.442365	-0.268825	-0.289671	0.0010494	1.62951	-0.462178	-0.551944	1	Neuro system
GAS2L3	ENSMMUG00000020360	-0.362567	3.46266	-0.234899	-0.297796	-0.287918	-0.289562	-0.362085	-0.339018	-0.323075	-0.231449	-0.17926	-0.0936231	-0.139538	-0.321866	1	Neuro system
-	ENSMMUG00000055254	-0.869607	0.697533	1.74452	1.25724	0.0447683	-0.773371	-0.901396	1.90626	-0.154033	-1.02653	-0.468756	-0.310303	-0.707754	-0.438576	1	Neuro system
-	ENSMMUG00000052372	-0.837302	-0.593948	0.944593	2.5921	-0.194762	-0.411484	-0.561385	-0.402575	0.995778	0.911115	-0.820392	-0.248274	-0.412062	-0.961397	1	Neuro system
-	ENSMMUG00000061475	0.179836	-0.148281	2.24899	2.05575	0.608053	0.0883845	-0.660571	-0.454183	-0.455183	-0.755989	-0.735091	-0.747435	-0.696562	-0.527721	1	Neuro system
RFX4	ENSMMUG00000022118	-0.084055	2.72401	1.60842	0.715741	-0.509916	-0.518638	-0.519398	-0.423674	-0.499478	-0.455462	-0.515157	-0.518719	-0.506568	-0.497108	1	Neuro system
Metazoa_SRP	ENSMMUG00000059980	-0.67329	-0.67329	-0.304674	2.92821	-0.233274	-0.67329	-0.450875	1.3153	-0.387852	-0.276659	0.162994	0.34178	-0.401786	-0.67329	1	Neuro system
Metazoa_SRP	ENSMMUG00000062539	-0.591572	0.23691	-0.155603	2.72141	-0.331365	-0.591572	-0.591572	0.976387	-0.591572	1.28484	-0.591572	-0.591572	-0.591572	-0.591572	1	Neuro system
FAM222A	ENSMMUG00000060613	-0.585555	1.28437	1.67331	2.33004	-0.620149	-0.692645	-0.306993	-0.608074	0.0983244	-0.467143	-0.605745	-0.234816	-0.623541	-0.64138	1	Neuro system
-	ENSMMUG00000031562	-0.590948	0.2626	1.66817	2.1729	-0.691714	-0.898177	-0.800116	0.637564	-0.364137	0.533409	-0.951929	0.45484	-0.408417	-1.02405	1	Neuro system
CUX2	ENSMMUG00000001909	2.49165	1.1364	0.29346	1.1754	-0.689267	-0.684538	-0.704415	-0.667526	-0.678107	-0.364735	0.591918	-0.644975	-0.633264	-0.622	1	Neuro system
Metazoa_SRP	ENSMMUG00000056974	1.06142	-0.238064	-0.469318	3.09759	-0.469318	-0.469318	-0.469318	-0.469318	-0.469318	-0.469318	0.462465	-0.469318	-0.469318	-0.159545	1	Neuro system
-	ENSMMUG00000053496	-0.491698	0.0981094	1.144	1.47146	-1.34247	-0.977233	-0.685558	0.905093	0.369303	1.15183	-0.639125	0.962153	-0.483588	-1.48227	1	Neuro system
Metazoa_SRP	ENSMMUG00000060754	-0.115718	-0.199891	-1.0154	1.5469	-0.118935	-0.715636	-0.885932	2.45727	-0.0184823	0.369871	-0.5286	0.757211	-0.699315	-0.833333	1	Neuro system
-	ENSMMUG00000064595	-0.749176	0.00213824	1.04238	2.47834	0.0129534	-0.506806	0.257039	-0.672225	-0.537958	1.20765	-1.1323	0.188687	-0.566971	-1.02375	1	Neuro system
Metazoa_SRP	ENSMMUG00000062343	-0.673998	-0.16395	0.267059	2.49514	0.0269529	-0.36121	0.746659	1.55807	-0.908768	-0.0653073	-0.464166	-0.638942	-0.908768	-0.908768	1	Neuro system
-	ENSMMUG00000054004	2.45169	-0.0872086	-0.330789	2.24111	-0.443183	-0.286165	-0.443183	-0.443183	-0.443183	-0.443183	-0.443183	-0.443183	-0.443183	-0.443183	1	Neuro system
CFAP73	ENSMMUG00000021794	-1.09221	-0.0664989	1.93042	2.07193	-0.898917	-0.865991	-0.24545	-0.412779	0.161668	0.998587	-0.786071	-0.571989	-0.138073	-0.0846279	1	Neuro system
IQCD	ENSMMUG00000001128	-0.844662	0.219921	1.22129	1.97511	-0.78284	-0.969648	-0.654895	-0.406813	-0.646495	0.377466	-0.792126	1.8315	-0.354892	-0.172914	1	Neuro system
Metazoa_SRP	ENSMMUG00000059861	-0.625436	0.657407	0.411362	2.47766	-0.745649	-0.983515	-0.141876	-0.804348	0.868124	0.517374	-0.757474	0.79986	-0.689973	-0.983515	1	Neuro system
PLBD2	ENSMMUG00000004205	-0.975169	1.47244	1.44004	1.76791	-0.521727	-1.02261	0.273309	-0.132407	-0.652323	0.478413	0.426527	-0.663105	-0.62393	-1.26738	1	Neuro system
LHX5	ENSMMUG00000061944	-0.487983	0.445272	2.39315	2.1777	-0.487983	-0.487983	-0.487983	-0.399671	-0.487983	-0.487983	-0.469414	-0.487983	-0.27095	-0.460203	1	Neuro system
-	ENSMMUG00000055859	-0.336416	3.39643	0.206643	-0.471895	-0.3369	-0.313905	-0.471895	-0.268532	0.0535304	-0.228526	-0.471895	-0.00476758	-0.471895	-0.279978	1	Neuro system
-	ENSMMUG00000052645	-0.543567	3.12192	0.88931	0.593156	-0.444889	-0.466575	-0.543567	-0.147156	-0.330192	-0.543567	-0.543567	-0.315927	-0.462383	-0.262993	1	Neuro system
Metazoa_SRP	ENSMMUG00000050441	-0.113152	1.62925	0.247984	2.28036	-0.652585	-0.652585	-0.109201	-0.652585	-0.652585	1.28544	-0.652585	-0.652585	-0.652585	-0.652585	1	Neuro system
Metazoa_SRP	ENSMMUG00000049805	2.12695	-0.265929	-0.461449	2.55428	-0.461449	-0.461449	-0.275209	-0.461449	-0.461449	-0.461449	-0.461449	-0.248956	-0.461449	-0.199544	1	Neuro system
Metazoa_SRP	ENSMMUG00000056919	0.812565	-0.591594	1.75262	1.95326	-0.591594	-0.591594	-0.591594	-0.591594	-0.591594	-0.591594	-0.591594	-0.591594	-0.591594	1.39751	1	Neuro system
Metazoa_SRP	ENSMMUG00000060203	0.00662281	-0.289184	-0.289184	3.46359	-0.289184	-0.289184	-0.289184	-0.289184	-0.289184	-0.289184	-0.289184	-0.289184	-0.289184	-0.289184	1	Neuro system
MSI1	ENSMMUG00000031527	0.223028	1.11914	2.12575	2.0157	-0.508462	-0.623487	-0.702867	-0.540112	-0.565732	-0.72473	-0.395904	-0.442017	-0.440049	-0.540254	1	Neuro system
-	ENSMMUG00000061718	-0.476329	1.8049	-0.159235	2.48369	-0.525218	-0.452863	-0.80684	-0.381196	-0.215204	0.83678	-0.636031	-0.405604	-0.251072	-0.815783	1	Neuro system
CABP1	ENSMMUG00000002536	3.28809	-0.0977581	0.428556	0.523258	-0.418942	-0.429356	-0.434099	-0.424585	-0.389251	-0.429176	-0.436016	-0.376934	-0.370463	-0.433319	1	Neuro system
Metazoa_SRP	ENSMMUG00000065047	-0.221304	-0.197616	-0.63315	3.09893	-0.222776	-0.63315	0.196576	-0.0149417	-0.63315	0.846495	-0.63315	0.313537	-0.63315	-0.63315	1	Neuro system
P2RX7	ENSMMUG00000006298	-0.0587952	2.5944	0.448355	0.826935	-0.732036	-0.754077	-0.793559	0.893362	-0.562987	0.820367	-0.799993	-0.483673	-0.75799	-0.640311	1	Neuro system
-	ENSMMUG00000057798	-0.0966995	0.251753	1.37512	2.64732	-0.792578	-0.766351	-0.739011	-0.250723	-0.513745	0.209989	-0.751462	0.71096	-0.629873	-0.654696	1	Neuro system
LRRC43	ENSMMUG00000012844	-0.187751	0.537836	-0.00302521	3.32299	-0.470483	-0.368255	-0.489775	-0.0495495	-0.364359	-0.0449168	-0.545178	-0.409724	-0.506403	-0.421408	1	Neuro system
HIP1R	ENSMMUG00000015221	-0.618267	0.926945	0.407996	1.95068	-0.786927	-0.850897	-0.907234	-0.694311	-0.347007	1.90238	-0.685533	-0.0162921	0.526019	-0.807545	1	Neuro system
ARL6IP4	ENSMMUG00000015930	0.938053	0.406309	0.875408	2.54322	0.0115964	-0.844023	-1.06967	0.276039	-0.313332	0.242327	-1.05118	-0.441502	-0.570483	-1.00276	1	Neuro system
Metazoa_SRP	ENSMMUG00000057330	3.38607	-0.299922	-0.20571	0.374323	-0.309327	-0.283196	-0.307649	-0.00054475	-0.462729	-0.186176	-0.316953	-0.462729	-0.462729	-0.462729	1	Neuro system
RILPL1	ENSMMUG00000008416	-0.10829	0.198879	-0.231732	2.01502	1.28373	-0.0831762	1.69924	0.22849	-0.800542	-0.625427	-0.966733	-0.856184	-0.918766	-0.834513	1	Neuro system
-	ENSMMUG00000059674	-0.423326	-0.459434	0.486329	2.03049	0.123785	-0.56532	-0.844537	2.02251	-0.259503	0.321173	-0.714404	0.400031	-0.940179	-1.17762	1	Neuro system
CCDC92	ENSMMUG00000009212	0.457326	0.985499	1.82215	2.21696	-0.341085	-0.745742	-0.236387	-0.264292	-0.757881	-0.664965	-0.978179	-0.316983	-0.487	-0.689412	1	Neuro system
Metazoa_SRP	ENSMMUG00000053616	-0.446649	-0.446649	0.6796	3.22128	0.225551	0.340057	-0.446649	-0.446649	-0.446649	-0.446649	-0.446649	-0.446649	-0.446649	-0.446649	1	Neuro system
-	ENSMMUG00000052140	-0.237645	0.848738	1.5639	1.85821	0.210481	-0.756157	-0.404792	0.162156	-1.11453	-0.105027	-1.17473	-0.831568	-1.05673	1.0377	1	Neuro system
TMEM132B	ENSMMUG00000020804	1.28524	1.59848	1.91226	1.18288	-0.645644	-0.666418	-0.676737	-0.516554	-0.660529	-0.244324	-0.646151	-0.659621	-0.682847	-0.580033	1	Neuro system
Metazoa_SRP	ENSMMUG00000056212	-0.355608	-0.355608	-0.355608	3.22397	-0.355608	-0.355608	-0.355608	-0.355608	-0.355608	-0.355608	-0.355608	-0.355608	-0.355608	1.04332	1	Neuro system
-	ENSMMUG00000058734	3.4744	-0.267261	-0.267261	-0.267261	-0.267261	-0.267261	-0.267261	-0.267261	-0.267261	-0.267261	-0.267261	-0.267261	-0.267261	-0.267261	1	Neuro system
TMEM132C	ENSMMUG00000000031	0.0974832	1.55253	1.43082	1.48129	-0.578372	-0.629609	-0.744562	1.45883	-0.856691	-0.469602	-0.912157	-0.693404	-0.645865	-0.490691	1	Neuro system
Metazoa_SRP	ENSMMUG00000061858	-0.605382	1.16067	0.788635	2.79961	-0.605382	0.124928	-0.605382	0.334664	-0.605382	-0.605382	-0.605382	-0.36546	-0.605382	-0.605382	1	Neuro system
Metazoa_SRP	ENSMMUG00000053809	0.486084	-0.171242	0.0358421	3.15067	-0.529099	-0.529099	-0.529099	-0.0211469	-0.529099	-0.529099	0.752589	-0.529099	-0.529099	-0.529099	1	Neuro system
Metazoa_SRP	ENSMMUG00000050462	3.04638	-0.476278	-0.00579869	1.31134	-0.476278	-0.476278	-0.33434	-0.264769	-0.476278	-0.476278	0.0574128	-0.476278	-0.476278	-0.476278	1	Neuro system
-	ENSMMUG00000053879	-0.102358	-0.213927	0.992731	3.1752	-0.48057	-0.48057	-0.48057	-0.48057	-0.48057	-0.48057	0.116304	-0.48057	-0.48057	-0.123393	1	Neuro system
TMEM132D	ENSMMUG00000012569	3.30926	-0.0328926	-0.308231	0.740443	-0.40239	-0.397338	-0.398937	-0.348629	-0.37871	-0.409078	-0.386834	-0.362794	-0.404952	-0.218922	1	Neuro system
RIMBP2	ENSMMUG00000009048	1.8312	1.02479	0.542346	1.84323	-0.757156	-0.75138	0.806305	-0.761056	-0.677263	-0.768213	-0.760445	-0.341482	-0.480374	-0.750491	1	Neuro system
Metazoa_SRP	ENSMMUG00000050145	0.331875	-0.329706	-0.227014	2.23	-0.507166	-0.507166	2.36647	-0.507166	-0.507166	-0.507166	-0.507166	-0.3143	-0.507166	-0.507166	1	Neuro system
U6	ENSMMUG00000034335	-0.0355718	-0.392267	-0.379972	2.31942	-0.25856	-0.540517	-0.626684	2.25703	0.0419602	0.0369712	-0.626684	-0.541761	-0.626684	-0.626684	1	Neuro system
-	ENSMMUG00000053523	0.95532	1.88865	-0.303887	2.4352	-0.442563	-0.51993	-0.51993	-0.51993	-0.51993	-0.51993	-0.51993	-0.51993	-0.51993	-0.373277	1	Neuro system
Metazoa_SRP	ENSMMUG00000053554	-0.312789	0.018539	-0.376339	3.30981	0.153217	-0.341301	-0.525353	0.369597	-0.479571	-0.0157072	-0.569559	-0.0510767	-0.589731	-0.589731	1	Neuro system
MMP17	ENSMMUG00000010331	3.26935	0.197487	-0.146419	0.756842	-0.43544	-0.423903	-0.430457	-0.338918	-0.43544	-0.382128	-0.43544	-0.429755	-0.43544	-0.330337	1	Neuro system
LRCOL1	ENSMMUG00000031455	0.136032	2.10764	1.45314	1.70909	-0.038959	-0.584822	-0.717504	-0.63423	-0.364595	-0.276582	-0.516546	-0.59203	-0.89981	-0.780836	1	Neuro system
GOLGA3	ENSMMUG00000031451	-0.784771	0.25444	1.30809	2.16508	-0.155751	-0.93244	-0.744152	0.817958	-0.887719	0.717984	-0.932433	0.351088	0.0496216	-1.22699	1	Neuro system
CCDC115	ENSMMUG00000058169	0.219071	-0.290364	-0.22735	2.61314	-0.593551	-0.0120965	-0.808048	-0.0416158	1.69384	-0.0393272	-0.608008	-0.556687	-0.164473	-1.18453	1	Neuro system
MZT2B	ENSMMUG00000013573	1.94842	0.323174	0.335115	2.44906	-0.0928643	-0.422168	-0.695397	-0.654412	-0.778146	-0.332959	-0.730877	-0.322619	-0.44583	-0.580489	1	Neuro system
-	ENSMMUG00000042257	0.503166	1.774	-0.157491	1.52062	-0.106882	-0.213053	-1.19527	0.3171	-0.934955	0.717783	-1.45654	0.862038	-1.03129	-0.599224	1	Neuro system
-	ENSMMUG00000062404	-0.438906	-0.126787	-0.438906	0.096002	-0.438906	-0.324178	-0.438906	-0.438906	-0.438906	-0.438906	-0.438906	0.0133804	0.528891	3.32394	1	Neuro system
-	ENSMMUG00000054362	-0.220163	0.606782	2.25877	2.1586	-0.600798	-0.600798	-0.600798	-0.315119	0.137304	-0.600798	-0.420588	-0.600798	-0.600798	-0.600798	1	Neuro system
-	ENSMMUG00000041273	0.0206361	1.76848	0.865676	2.53308	-0.544426	-0.53665	-0.51311	-0.438235	-0.547362	-0.452709	-0.553365	-0.528115	-0.544845	-0.529057	1	Neuro system
-	ENSMMUG00000061446	-0.464399	1.69728	0.348125	2.79925	-0.464399	-0.464399	-0.464399	-0.464399	-0.338563	-0.464399	-0.464399	-0.464399	-0.464399	-0.326511	1	Neuro system
-	ENSMMUG00000055526	-0.299394	-0.136062	0.289028	3.42408	-0.362322	-0.303615	-0.311611	-0.267863	-0.313512	-0.317106	-0.314654	-0.362322	-0.362322	-0.362322	1	Neuro system
Y_RNA	ENSMMUG00000064325	-0.585128	-0.585128	-0.585128	2.26924	-0.585128	-0.585128	-0.585128	-0.585128	1.45089	-0.585128	0.906167	1.22498	-0.585128	-0.585128	1	Neuro system
Metazoa_SRP	ENSMMUG00000062574	0.799813	-0.422579	-0.0824532	3.26979	-0.422579	-0.422579	-0.422579	-0.422579	-0.422579	-0.422579	-0.229667	0.0457281	-0.422579	-0.422579	1	Neuro system
-	ENSMMUG00000053000	1.17718	2.58808	0.326836	1.35554	-0.551514	-0.551514	-0.551514	-0.551514	-0.551514	-0.484007	-0.551514	-0.551514	-0.551514	-0.551514	1	Neuro system
BIN1	ENSMMUG00000000376	-0.168364	0.408555	0.542381	1.5427	-0.678886	-0.708467	2.64822	-0.48344	-0.596182	-0.0484612	-0.685495	-0.418979	-0.647262	-0.706316	1	Neuro system
-	ENSMMUG00000064775	0.272234	-0.263226	0.140172	3.26372	0.0291681	-0.168641	-0.648498	-0.368428	0.306489	-0.153541	-0.65334	-0.452967	-0.630687	-0.672455	1	Neuro system
-	ENSMMUG00000059960	0.0696118	-0.405238	0.560581	3.32362	-0.257785	-0.473704	-0.335425	-0.419124	-0.137051	-0.371	-0.432281	-0.195491	-0.26296	-0.663752	1	Neuro system
Metazoa_SRP	ENSMMUG00000058593	-0.267261	-0.267261	-0.267261	3.4744	-0.267261	-0.267261	-0.267261	-0.267261	-0.267261	-0.267261	-0.267261	-0.267261	-0.267261	-0.267261	1	Neuro system
Metazoa_SRP	ENSMMUG00000063296	1.06222	-0.214067	-0.235385	3.1191	0.219173	-0.439753	-0.464013	-0.503234	-0.617867	-0.3435	-0.545555	-0.00347015	-0.523961	-0.509686	1	Neuro system
GLI2	ENSMMUG00000001868	-1.40754	0.985898	0.828826	1.48249	0.361255	-1.00369	-0.22899	1.46879	-1.13052	-0.159328	-1.46283	0.453813	0.177438	-0.365614	1	Neuro system
INHBB	ENSMMUG00000060196	-0.547735	-0.452023	1.11318	0.962275	-0.428457	-0.417641	-0.480367	-0.0313267	-0.513511	-0.58862	0.258911	-0.841123	-0.808802	2.77523	1	Neuro system
[truncated: 24,145 more rows]

## Sheet: Supplementary Table 4
Supplementary Table 4. Expression profiling for multiple organs of rhesus macaque post SARS-CoV-2 infection.
GeneID	GeneName	GeneType	Brain_Control	Brain_Infected1	Brain_Infected2	Brain_Infected3	Brainstem_Control	Brainstem_Infected1	Brainstem_Infected2	Brainstem_Infected3	Cerebellum_Control	Cerebellum_Infected1	Cerebellum_Infected2	Cerebellum_Infected3	Medulla_Control	Medulla_Infected1	Medulla_Infected2	Medulla_Infected3	Left ventricle_Control	Left ventricle_Infected1	Left ventricle_Infected2	Left ventricle_Infected3	Right ventricle_Control	Right ventricle_Infected1	Right ventricle_Infected2	Right ventricle_Infected3	Muscle_Control	Muscle_Infected1	Muscle_Infected2	Muscle_Infected3	Lung_Control	Lung_Infected1	Lung_Infected2	Lung_Infected3	Kidney_Control	Kidney_Infected1	Kidney_Infected2	Kidney_Infected3	Spleen_Control	Spleen_Infected1	Spleen_Infected2	Spleen_Infected3	Liver_Control	Liver_Infected1	Liver_Infected2	Liver_Infected3	Intestine_Control	Intestine_Infected1	Intestine_Infected2
ENSMMUG00000023296	-	protein_coding	0.0812349	0.12454	0.118995	0.0664926	0.0515443	0.0835942	0.114298	0.114526	0.325487	0.0249521	0.0607637	0.0651361	0	0	0.174632	0	0.0323777	0.0652979	0.0149314	0.0167701	0	0.0665336	0	0	0.049098	0.0348593	0	0.0162465	0.0243878	0.31082	0.117003	0.348815	0.168027	0.27297	0.423973	0.0471661	0.233483	0.609847	0.456527	0.424913	0.153841	0.120166	0.149923	0.173879	0.354787	0.224705	0.414978
ENSMMUG00000036181	U6	snRNA	0	0	0	0	0	0	0	0	0	0	0	0	0	0	0	0	0	0	0	0	0	0	0	0	0	0	0	0	0	0	0	0.907935	1.0934	0	0.735709	0	0.759669	0.61053	0	0	0.400434	0	0	0.411448	0.486042	0.584888	0.771537
ENSMMUG00000000634	ZNF692	protein_coding	1.17941	2.80195	1.6105	3.52811	4.95726	0.822822	4.61267	4.83791	13.0154	8.74966	4.48575	5.04896	3.8584	1.36783	1.8741	2.25001	3.13716	2.74165	1.534	3.76563	2.21459	6.93778	2.70858	1.44125	2.4365	3.15243	2.71119	2.45869	4.56095	3.04203	2.35132	4.31321	2.00277	1.82323	3.09511	2.36482	9.085	7.57558	9.05332	9.30882	1.18302	1.29779	1.11702	1.49756	4.70985	2.70944	4.41288
ENSMMUG00000037875	ZNF672	protein_coding	0.686995	3.29855	1.41918	3.70375	1.76038	0.47583	2.02616	1.42796	5.84489	1.35944	0.914101	0.829806	1.38875	0.695388	0.757359	0.842921	2.63284	3.46464	1.88196	3.91377	1.80258	1.5284	0.518403	0.242802	2.54187	4.47872	2.4223	3.65946	2.16161	1.9071	1.11	1.41822	2.11782	0.998862	1.88468	1.59168	4.34304	4.57758	4.36743	5.01009	1.46364	1.53086	1.24621	1.25968	3.65939	3.03319	2.67546
ENSMMUG00000000632	SH3BP5L	protein_coding	7.93318	10.9516	6.48347	13.3576	11.2193	2.15563	9.41262	8.95502	20.4643	15.6915	10.1849	8.19961	14.7942	4.65937	6.31097	8.88305	11.5811	10.3881	7.40257	15.317	6.69816	21.626	6.91054	4.70005	12.5791	11.9033	12.152	9.98711	12.4154	9.07278	7.00755	10.2425	7.63497	5.36848	6.41868	9.12199	11.6531	15.0041	13.0234	13.3724	5.88662	5.14227	4.42032	5.0755	10.0187	11.4207	12.1311
ENSMMUG00000064799	-	protein_coding	0.108264	0.197592	0	0.110771	0.190818	0.680828	0.152328	0.50877	0.180744	0.277119	0.404907	0.192908	0.261618	1.23467	0.0430995	0	0	0	0.0331657	0.0372499	0	0.258624	0.0885032	0.306106	0.109057	0.116145	0.226598	0.180434	0.216681	0.0627633	0.0866294	0.232437	0	0.216544	0	0.0523829	0.0648268	0.2084	0.178949	0.104869	0	0.118628	0	0.0351111	0.0414766	0.0499117	0.263358
ENSMMUG00000057389	LYPD8	protein_coding	0.014671	0.393607	1.10139	0.795565	0.667136	0.0125809	0.144495	0.163742	1.5553	0.326709	0.0137174	0.215665	0.119651	0.0579158	0.0613249	0.141289	0.416628	0.442229	0.080898	1.06761	0.145424	0.398028	0.161908	0.0414808	0.066503	0.188867	0.110544	0.205387	0.385387	0.599613	0.290547	1.92137	1.92505	1.8751	0.599793	3.04525	0.816984	0.709543	0.60624	0.927263	1.06967	0.198934	0.624254	0.720831	9.1053	7.5279	5.42012
ENSMMUG00000031200	-	protein_coding	0	3.15039	6.03593	2.89752	2.61454	0	0.69572	0.211244	8.10493	0.690367	0.252179	0.660795	0.65175	0	0.161056	0.216454	1.88122	2.3938	0.619675	8.49102	0.786311	0.552249	0.165361	0	1.13202	1.10915	0.225803	1.97781	3.10387	2.5799	1.67256	29.8213	3.54481	1.72628	2.18967	6.65539	6.05619	6.35984	4.30942	37.3591	0.978977	0.406353	0.368714	5.42313	1.54992	1.86512	0.574074
ENSMMUG00000052613	-	protein_coding	0.0322573	0.741798	2.63821	1.11114	1.04612	0.46103	0.226931	1.04849	2.49518	1.60182	0.583105	1.02022	1.57847	0.226383	0.0770492	0.698975	1.26425	1.11278	0.33598	2.58599	0.639492	0.748556	0.369175	0.060803	0.18413	0.334519	0.121527	0.698887	0.871566	1.57083	0.47751	3.34732	1.23713	0.838755	0.804359	2.85618	2.49166	2.96493	1.8839	3.9526	0.427618	0.247417	0.275614	1.20306	1.001	0.862533	0.725827
ENSMMUG00000031199	OR2T27	protein_coding	0	0	0	0	0	0	0	0	0	0	0	0	0	0	0	0	0	0	0	0	0	0	0	0	0	0	0	0	0	0	0	0	0.0590253	0	0	0	0	0	0	0	0	0	0	0	0	0	0
ENSMMUG00000053841	-	protein_coding	0	0	0	0	0	0	0	0	0	0	0	0	0	0	0	0	0	0	0	0	0	0	0	0	0	0	0	0	0	0	0	0	0	0	0	0	0.0802522	0.064497	0	0	0	0	0	0	0	0	0
ENSMMUG00000017095	-	pseudogene	0	0	0	0	0	0	0	0	0	0	0	0	0	0	0	0	0	0	0	0	0	0	0	0	0	0	0	0	0	0	0	0	0	0	0	0	0	0.0685017	0.0784281	0	0	0	0	0	0	0	0
ENSMMUG00000025700	Y_RNA	Y_RNA	0	0	0	0	0	0	0	0	0	0	0	0	0	0	0	0	0	0	0	0	0	0	0	0	0	0	0	0	0	0	0	0	0	0	0	0	0	0	0	0	0	0	0	0	0	0	0
ENSMMUG00000049101	OR2T10	protein_coding	0	0	0	0	0	0	0	0	0	0	0	0	0	0	0	0	0	0	0	0	0	0	0	0	0	0	0	0	0	0	0	0	0	0	0	0	0	0	0	0	0	0	0	0	0	0	0
ENSMMUG00000048289	-	pseudogene	0	0	0	0	0	0	0	0	0	0	0	0	0	0	0	0	0	0	0	0	0	0	0	0	0	0	0	0	0	0	0	0	0	0	0	0	0	0	0	0	0	0	0	0	0	0	0
ENSMMUG00000017368	-	protein_coding	0	0	0	0	0	0	0	0	0	0	0	0	0	0	0	0	0	0	0	0	0	0	0	0	0	0	0	0	0	0	0	0	0	0	0.0796825	0	0	0	0	0	0	0	0	0	0	0	0
ENSMMUG00000055842	OR14I1	protein_coding	0	0	0	0	0	0	0	0	0	0	0	0	0	0	0	0	0	0	0	0	0	0	0	0	0	0	0	0	0	0	0	0	0	0	0	0	0	0	0	0	0	0	0	0	0	0	0
ENSMMUG00000031198	-	pseudogene	0	0	0	0	0	0	0	0	0	0	0	0	0	0	0	0	0	0	0	0	0	0	0	0	0	0	0	0	0	0	0	0	0	0	0	0	0	0	0	0	0	0	0	0	0	0	0
ENSMMUG00000062331	OR9G1	protein_coding	0	0	0	0	0	0	0	0	0	0	0	0	0	0	0	0	0	0	0	0	0	0	0	0	0	0	0	0	0	0	0	0	0	0	0	0	0	0	0	0	0	0	0	0	0	0	0
ENSMMUG00000049901	-	protein_coding	0	0	0	0	0	0	0	0	0	0	0	0	0	0	0	0	0	0	0	0	0	0	0	0	0	0	0	0	0	0	0	0	0	0	0	0	0	0	0	0	0	0	0	0	0	0	0
ENSMMUG00000064657	-	protein_coding	0	0	0	0	0	0	0	0	0	0	0	0	0.0809674	0	0	0	0	0	0	0	0	0	0	0	0	0	0	0	0	0	0	0	0	0	0.0777211	0	0	0	0	0	0	0	0	0	0	0	0
ENSMMUG00000005566	OR2T1	protein_coding	0	0	0	0	0	0	0	0.0461025	0	0	0	0	0	0	0	0	0	0	0	0	0	0	0	0	0	0	0	0	0	0	0	0	0	0	0	0	0	0	0	0	0	0	0	0	0	0	0
ENSMMUG00000064874	OR2T6	protein_coding	0	0	0	0	0.0496908	0	0	0	0	0	0	0	0	0	0	0	0	0	0	0	0	0	0	0	0	0	0	0	0	0	0	0	0	0	0	0	0	0	0	0	0	0	0	0	0	0	0
ENSMMUG00000039595	-	protein_coding	0	0	0	0	0	0	0	0	0	0	0	0	0.0840716	0	0	0	0	0	0	0	0	0.0474911	0	0	0	0	0	0	0	0	0.0556771	0	0	0	0	0	0	0	0	0	0	0	0	0	0	0	0.169262
ENSMMUG00000038524	OR2M4	protein_coding	0	0.0509603	0.0568067	0	0.196852	0	0.589295	0	0	0	0.0870233	0	0	0	0	0	0	0	0.213841	0	1.95368	0	0	0	0	0	1.46103	0	0	0	0.837834	0	0	0	4.04797	0	0	0	7.61507	0	0	0	3.19685	0	0	0	11.3769
ENSMMUG00000049432	-	protein_coding	0	0.0495315	0	0	0.1435	0	0.890979	0	0.151026	0	0	0	0.163953	0	0.0540198	0	0.18028	0	0	0	1.05495	0.092615	0	0	0.0911261	0.0485243	0.965643	0.0452303	0.611062	0.157332	0.705764	0	0.0584736	0.0542822	2.91151	0.0656554	0.162505	0.195902	3.43911	0	0	0.0371713	1.48404	0	0.259929	0	10.3152
ENSMMUG00000050812	-	protein_coding	0.466219	0.121557	0.216803	0.113575	0.258255	0.418837	0.68721	0.182577	0.296511	0.306865	0.332126	0.148344	2.25322	0.759557	0.450743	0.133629	0.265458	0.178454	0.0204032	0.114579	0.155339	0.477307	0.3539	0.251084	0.044727	0.0714509	0.139401	0.111001	0.19995	0.424724	0.559581	0.571971	0.430505	0.293074	0.926949	0.41893	0.239284	0	0.477045	0.0322571	0.0420436	0.0182447	0.204865	0.0863998	0.306191	0.0614103	1.70116
ENSMMUG00000059065	-	protein_coding	0	0.20319	0	0	0.0981116	0.0795584	0.97902	0	0.23233	0.142485	0.520472	0.185974	0.672573	0.122082	0.221602	0	0.0462219	0	0.298421	0.0478814	2.32611	0.332438	0	0	0.0934552	0	1.10683	0	0.208893	0.24203	1.11354	0.0995925	0.239873	0	4.68065	0.0673335	0	0	3.52701	0	0	0	2.75858	0	0.159943	0	8.29382
ENSMMUG00000064763	-	lncRNA	0.0118236	0.0388427	0.0721648	0	0.0875254	0	0.232902	0	0.0789568	0	0	0	0.0214287	0	0.0141208	0	0.153157	0	0.152127	0.0244086	0.827292	0.0242096	0	0.0167151	0.0238204	0	0.786955	0.0236465	0.053244	0.12338	0.340592	0	0.519692	0.255409	2.24208	0.0858119	0.0424788	0	1.38756	0	0.0783695	0.0291498	0.909212	0.0460143	0.0271782	0	3.53768
ENSMMUG00000053957	-	protein_coding	0.139163	0.0507974	0.0566252	0	0.0981116	0	0.848484	0	0.154887	0	0	0	0.0840716	0	0	0	0	0.0932181	0.170526	0.0957628	1.13601	0.0474911	0	0	0.0467276	0	0.699052	0.0927727	0	0.0806766	0.946512	0.0995925	0.359809	0	2.17892	0	0	0	2.14688	0	0.21962	0	0.856111	0	0	0	7.27825
ENSMMUG00000062908	Y_RNA	Y_RNA	0	0.467635	0	0	0.903204	0	0	0	0	0	0	0	0	0	0	0	0	0	0	0.44079	0.497997	0	0	0	0	0	1.07257	0	0	0	0.512557	0.916837	1.65618	0	8.91507	0	0	0	1.41171	0	0	0	1.75139	0	0.490807	0	5.45371
ENSMMUG00000057748	OR2L2	protein_coding	0	0.20319	0.169875	0	0.588669	0	0.261072	0	0.0774433	0	0.173491	0	0.588501	0	0.0554005	0	0.184888	0	0.298421	0.0957628	1.02782	0.237455	0	0	0	0	0.349526	0	0.765942	0.24203	0.668126	0	1.1394	0.0556696	0.484205	0	0.333316	0.0669697	1.22679	0	0.395317	0	0.951235	0	0.159943	0	4.48543
ENSMMUG00000051218	Y_RNA	Y_RNA	0	0	0	0	0	0	0	0	0	0	0	0	0	0	0	0	0	0	0	0	2.98798	0	0	0	0	0	0.536283	0	0	0	1.53767	0	1.10412	0	2.97169	0	0.767117	0	1.41171	0	0.40436	0	1.31354	0	0	0	12.4656
ENSMMUG00000050041	OR2L5	protein_coding	0	0.304785	0	0.0949237	0.539614	0	0.456876	0	1.00676	0	0	0	0.252215	0.122082	0.166202	0	0.369775	0	0.127895	0	0.540955	0.237455	0	0	0.18691	0	0.582543	0	0.62668	0.161353	0.278386	0.497962	1.19936	0.445357	0.161402	0.134667	0.249987	0.133939	0.766741	0	0.131772	0.0762428	1.28417	0	0.373201	0	3.13134
ENSMMUG00000052261	-	protein_coding	0	0.152392	0	0	0.196223	0	0.130536	0.0544982	0.774433	0	0	0	0.0840716	0	0.110801	0	0.231109	0	0.0852631	0	0.649146	0.0949822	0	0	0	0	0.640798	0	0	0.161353	0.167031	0.497962	0.359809	0.167009	0.887709	0.134667	0.333316	0.0669697	1.07344	0.1348	0.175696	0.114364	0.428056	0.0451322	0.106629	0	1.43872
ENSMMUG00000054556	Y_RNA	Y_RNA	0	0	0	0	0.451602	0	0	0	0	0	0	0	0	0	0	0	0	0	0	0	0	0.874395	0	0	0	0	0	0.854054	1.92305	0	0.512557	1.83367	1.65618	1.53746	2.97169	1.23973	0.767117	0	0	0	0	0	0	0	0.490807	0.590622	0.779101
ENSMMUG00000060886	-	protein_coding	0.0927756	0.101595	0	0	0.0490558	0.159117	0.261072	0	0.387216	0.142485	0	0	0.168143	0	0	0	0	0	0.0426316	0	0.0540955	0.0949822	0	0	0	0	0	0	0.139262	0	0.111354	0	0.299841	0.0556696	0.645607	0.0673335	0.166658	0	0	0	0.0878482	0.0762428	0.142685	0	0	0	0.0846308
ENSMMUG00000062168	-	protein_coding	0.0463878	0.0507974	0.11325	0	0.147167	0	0.32634	0	0.154887	0.0712423	0.0867453	0	0	0	0.110801	0	0.184888	0	0.0426316	0	0.108191	0.0949822	0	0	0	0	0.0582543	0	0.0696311	0	0.167031	0	0.239873	0.0556696	0.0807008	0	0.166658	0	0.0766741	0	0.263545	0.0381214	0.190247	0	0.0533145	0	0.592415
ENSMMUG00000059751	Y_RNA	Y_RNA	0	0	0	0	0	0	0	0	0	0	0	0	0	0	0	0	0.425513	0	0	0	0	0	0	0	0	0	0	0	0	0	0	0	0.55206	0.512488	0.742922	0	0	0	0	0	0	0	0	0	0	0	0
ENSMMUG00000018891	-	pseudogene	0	0.244609	0	0	0.4252	0	0	0	0.745838	0	0	0	0.0809674	0	0	0	0.356122	0.0448881	0	0.0922269	0	0.0914752	0	0	0.0900045	0	0	0	0.536481	0	0	0.0959152	0.346524	0	0.0777211	0.0648474	0.481513	0	0	0	0.253814	0	0	0.0434658	0.308076	0	0
ENSMMUG00000056262	-	protein_coding	0	0.353699	0.0563252	0.0236052	0.292776	0	0.29215	0.0271048	0.462199	0	0	0	0.292692	0.0607175	0.0275535	0	0.758622	0	0.14842	0.0238139	0.322854	0.212578	0	0	0.18592	0	0.20281	0	0.969672	0.0802493	0	0.19813	0.268427	0	0	0	0.165775	0	0.724546	0	0.174766	0	0.212894	0	0.291676	0.0319086	1.55738
ENSMMUG00000038159	OR2W3	protein_coding	0	0	0	0.0471605	0.0487443	0	0	0.162457	0	0	0	0	0	0	0.110098	0	0	0	0	0	0	0	0	0	0	0	0	0	0.138378	0.0801644	0.0553236	0.29688	0	0	0	0	0	0	0	0.133944	0	0	0	0.0448456	0	0	0
ENSMMUG00000005570	TRIM58	protein_coding	0.451749	0.260365	0.435352	0.194614	0.427444	0.530115	1.0036	0.670399	0.0793878	0.0365156	0.0889234	0.063548	1.29274	0.438014	1.13583	1.00178	0.710737	0.501683	0.131106	0.736255	0.194088	0.0730253	0.0874645	0	0.0239504	0	0.238868	0.190204	3.35484	3.05999	0.884665	6.63605	0.122948	0	0.124091	0.0345121	0.256264	0.583536	0.235798	2.79823	0.045027	0.0195393	0.024378	0.532052	0.0819797	0.131536	0
ENSMMUG00000006214	OR11L1	protein_coding	0	0.0407682	0	0.0228547	0.0314963	0	0.0419054	0	0	0	0	0	0	0	0	0	0.0296768	0.0374068	0	0	0.0260491	0	0	0	0.0300015	0	0.0187011	0.0148912	0.0558834	0.0776978	0.0089369	0.0799293	0	0	0.103628	0	0	0	0.0246144	0	0.00705038	0	0	0	0	0	0.0271686
ENSMMUG00000056211	-	protein_coding	0	0	0	0.099646	0	0.208791	0	0	0	0	0	0.0650755	0.044127	0.128155	0	0	0	0	0	0	0	0.0249269	0.0895668	0.103262	0	0	0	0	0.0365476	0	0	0.0522735	0	0	0.38122	0	0	0	0	0	0	0	0	0	0.0279834	0	0.088841
ENSMMUG00000049478	OR9H1P	protein_coding	0	0	0	0	0	0	0.139924	0	0	0	0	0	0	0	0	0	0	0	0	0	0.115972	0	0	0	0.0500881	0	0.0624439	0	0	0	0	0	0	0	0.0865046	0	0	0	0	0	0	0	0	0	0.114297	0	0
ENSMMUG00000062849	OR1C1	protein_coding	0	0.0496863	0.0553865	0.0464236	0.0479827	0	0	0	0	0	0	0	0	0	0	0	0.0452108	0	0	0	0	0	0	0	0	0	0.11396	0	0	0.0789118	0	0	0.0586564	0	0.157871	0	0	0	0	0.0659254	0	0	0	0	0	0.125507	0
ENSMMUG00000064145	OR14K1	protein_coding	0	0	0	0	0.0974886	0	0.194561	0	0	0	0	0	0	0	0	0	0	0	0	0	0	0	0	0	0	0	0.0578845	0	0	0.0801644	0	0.19792	0.0595874	0	0.160377	0	0.0827999	0	0	0	0	0	0	0	0	0	0
ENSMMUG00000059455	OR14A2	protein_coding	0	0	0	0.0445444	0.0920807	0	0	0	0	0	0	0	0	0	0.0259975	0	0.065071	0	0	0.0449382	0.126926	0	0	0	0.0657829	0.0467055	0.0273367	0	0	0	0	0.0934706	0.084423	0	0.265091	0	0	0	0	0.0632568	0	0	0	0	0.125093	0	0
ENSMMUG00000016175	OR6F1	protein_coding	0	0.10291	0.229433	0.0480762	0.397526	0	0.0661129	0	0	0	0	0	0	0	0.112235	0.0565653	0.140461	0	0	0	0.109592	0.0481059	0	0	0.0946649	0.0504087	0.0590084	0.187947	0	0	0.112796	0.100882	0	0	0	0	0.337631	0	0.155333	0	0	0	0	0	0	0	0.257179
ENSMMUG00000016176	OR13G1	protein_coding	0	0.103244	0	0.241162	0.199409	0	0.132655	0	0	0	0	0	0	0	0	0	0.0939445	0	0.129971	0	0.219895	0	0	0	0.142458	0.0505724	0.3552	0	0.212284	0.245959	0.169743	0	0	0	0.164022	0	0	0	0	0	0	0	0	0	0.05418	0.0651986	0.430023
ENSMMUG00000058340	-	protein_coding	0	0.122935	0.342597	0	0	0	0	0	0.0937104	0	0	0	0	0	0	0	0.279654	0.0563994	0	0.231756	0.196375	0	0	0	0.0565428	0	0.211472	0	0.0842572	0.0976229	0.269489	0.843584	0	0	0.976521	0	0	0	0.185559	0	0	0	0	0	0.0645132	0.0776333	0
ENSMMUG00000005955	GCSAML	protein_coding	0.424038	0.257971	0.143783	0.192825	0.249126	0.0808063	0.497187	0.055353	0.117987	0.0361798	0.0440529	0	0.0853902	0	0.0562694	0.113437	0.399048	0.14202	0	0.121581	0.384608	0.313534	0.0288868	0	0.0949209	0.0505451	0.177504	0.0706708	0.565786	0.327768	0.395853	0.859813	0.0609087	0	0.2459	0.0341948	0	0.442131	0.506199	0.136914	0.0223065	0	0.0966154	0	0.785184	0.130327	0.515749
ENSMMUG00000012954	-	protein_coding	0	0.233132	0.207902	0	0.360222	0	0.179726	0	0.781927	0	0.0796225	0	0	0	0	0	0.254559	0	0	0.0439498	0.0496537	0.217958	0	0	0.0428907	0	0.053471	0.0425775	0	0.0740521	0.0511054	0	0.0550441	0	0.222223	0	0.45892	0.122941	0.774162	0.123731	0.120952	0	0.0436564	0	0.0978735	0	0.155363
ENSMMUG00000060427	-	protein_coding	0.53665	0.391777	0.291149	0.610084	0.819745	0.204532	1.09066	1.50614	3.33483	1.5568	2.62035	0.796851	3.78236	0.156926	0.925769	0.825482	0.505024	0.629079	0.273997	0.338513	0.764891	1.77034	0.804283	0.252888	0	0.191905	0.299525	0	1.11882	0.0518517	0.286274	0.0640091	0.34688	0.214677	0.829876	0.346208	0.803346	0.989969	1.62622	1.08296	0.225844	0	0	0.0290069	0.0342658	0.247406	0.271965
ENSMMUG00000005949	OR2B11	protein_coding	0	0	0.278674	0.0467156	0	0.0783075	0.321209	0	0.0762256	0	0	0.0610168	0	0	0.0545294	0	0.136485	0	0	0	0	0.0467444	0	0	0	0.0489821	0	0	0.205609	0.158816	0.0548017	0.0980265	0	0	0.158864	0	0.0820188	0	0	0.06634	0	0	0.0468139	0.0444226	0	0.0631483	0
ENSMMUG00000005946	NLRP3	protein_coding	0.105137	0.782891	0.962546	0.871325	1.72335	0.144254	1.07988	0.704057	0.596779	0.209909	0.0786423	0.140502	0.781239	0.166017	0.489699	0.392353	0.796181	0.454244	0.173922	0.900732	0.318776	0.398258	0.0773522	0.0148632	0.296539	0.327091	0.475315	0.241807	4.57669	1.77366	3.47025	3.95016	0.475707	0.252348	0.365813	0.656222	5.13707	4.43212	4.29236	6.41591	0.71678	0.328324	0.291053	1.39116	0.882101	0.916085	1.26597
ENSMMUG00000052686	-	lncRNA	0.0381754	0.0418044	0.0466004	0.0781186	0.322968	0	0.429705	0.3588	0.318664	0.117259	0	0	0.0691878	0	0	0.0459562	0	0.076715	0	0.275832	0	0.547167	0.140434	0	0.0769101	0.204772	0.0479411	0.267219	0	0.199181	0.137461	0.327843	0	0.045814	0	0.055413	0.137153	0.165341	0.1893	0.166402	0	0	0	0	0	0	0
ENSMMUG00000019585	ZNF496	protein_coding	3.40271	3.47903	2.26756	4.15648	5.12223	2.382	5.96012	6.44517	10.8398	8.772	6.20075	5.28971	7.33112	2.42154	3.75282	3.78275	4.73984	3.83758	3.63773	5.59096	2.81411	10.5576	4.10859	3.21513	3.41015	2.68193	3.81532	3.10748	5.65494	5.25366	2.25043	3.83909	3.02984	1.41675	1.99336	2.39398	8.04602	7.29351	7.6617	7.11332	0.986323	0.984426	1.06801	0.878324	2.49414	3.26549	3.61076
ENSMMUG00000064912	Y_RNA	Y_RNA	0.799232	0	1.46342	0.817737	0	0	1.12453	0	0.667149	0	0.747283	1.60211	0	0	0	0	0	0.401522	0	0.412483	0.932031	1.22736	0.490015	0	1.20763	0.857411	0.501842	1.99802	0	0	0.479641	1.71591	1.03321	3.35703	1.39042	0.580057	0	0	0	0	0	0	0	0.388799	0.918574	0	0
ENSMMUG00000021266	-	processed_pseudogene	0.0343248	0.0375877	0.2095	0.070239	0.0725979	0	0.0482952	0	0.114609	0.0527159	0	0	0	0	0	0	0.068404	0	0	0.24801	0	0.0702823	0.168358	0	0.0691524	0.0736468	0.0862109	0.171618	0.103047	0.179091	0	0.0736937	0.0443736	0	0.0597148	0.0498236	0.0616595	0.0991088	0.11347	0.199491	0.0650035	0	0.0703869	0	0	0	0
ENSMMUG00000058602	-	protein_coding	0.0420852	0	0	0.0861192	0.0445057	0.0721791	0.118428	0.0494433	0.0702601	0	0.0786993	0	0	0	0	0	0.0838693	0	0	0	0	0	0.0516055	0	0	0	0	0	0	0	0	0	0	0	0.0732155	0	0.0755999	0	0.139125	0.122296	0	0	0	0	0	0.0582063	0
ENSMMUG00000059322	-	protein_coding	0.17991	1.58704	1.45189	1.33966	0.887867	0.0685685	0.309386	0.0352275	0.884378	0.122802	0.112144	0.0667852	0.615895	0.157826	0.0716215	0.0360964	1.12539	0.843583	0.321497	0.928512	0.990738	0.286516	0.220608	0.0565198	0.624228	0.375289	0.715454	0.269856	3.01563	7.00537	2.44729	4.03425	2.46793	0.959592	2.41697	1.2622	9.89296	6.37792	7.15344	4.89403	1.53319	0.377838	0.748099	1.08914	4.18143	1.42384	5.06934
ENSMMUG00000004566	ZNF124	protein_coding	4.75565	2.32192	1.73786	2.20044	4.32445	1.35072	10.0155	0.854083	3.79273	0.511726	0.169931	0.526238	1.70184	3.02929	0.976752	0.619897	2.11277	2.00873	0.27838	1.81343	2.40202	1.51955	0.85429	0.727977	0.823842	0.617419	0.456474	0.302898	2.81904	5.32079	2.39954	2.86145	13.1965	3.2353	2.95102	4.48475	9.08698	7.21554	7.86059	6.33764	2.0651	0.821466	1.92556	3.12391	5.63984	1.42439	5.58157
ENSMMUG00000058214	-	protein_coding	0	0.0798975	0.890637	0.149302	0.0771581	0	0	0	0	0	0	0.0975042	0	0.768071	0	0	0.0727008	0	0	0.301244	0.680679	0	0	0	0	0.313091	0.366505	0	0.438081	2.66476	0.262718	0.783227	1.03754	0.612926	1.26931	0.635439	0.524261	0.73734	0.120598	0.212021	0.138173	0.179879	0.149616	0.283947	0.419282	0.201821	0.133113
ENSMMUG00000023311	-	protein_coding	0.735158	2.1384	2.9446	1.99798	1.53059	1.45786	1.61621	0.620779	6.86537	1.16434	1.24587	1.16666	2.20675	4.65552	0.521308	0.525467	2.49518	1.63891	0.675629	2.51362	2.0897	1.41121	0.732439	0.64956	0.717402	1.05978	0.778967	0.574324	2.10359	5.47388	2.48169	3.25535	4.57371	1.73695	3.11745	2.9012	6.19034	4.37804	5.54407	5.94163	1.00066	0.660791	1.48397	1.27406	3.96062	2.06531	4.06562
ENSMMUG00000050290	ZNF670	protein_coding	0.760841	1.18032	1.31573	1.62179	0.5364	0.978673	1.15972	0.521422	3.59891	1.02244	0.770669	0.423654	0.057455	0.584019	0.227166	0.305304	1.32671	1.6882	0.349616	1.04712	1.33089	0.22719	0.388731	0.358534	0.542877	0.646178	0.636982	0.221905	0.666208	4.5762	1.25565	1.4293	3.31959	2.16856	4.74302	2.34682	1.48064	2.51721	1.67679	1.4279	0.540324	0.390786	1.00762	1.01784	1.1295	0.920752	2.19781
ENSMMUG00000054567	-	protein_coding	0	0.125194	0.279113	0.038991	0.120901	0	0	0	0.127243	0	0	0	0	0	0	0	0	0.229742	0	0.236014	0.0444407	0	0	0	0.0383878	0.0408827	0.191429	0	0	0.0662776	0	0.490905	0	0	0.198893	0.27658	0.0684566	0.275086	0.0629895	0.221482	0.0721692	0.0626352	0.312584	0.222463	0.175196	0.316239	0.417156
ENSMMUG00000031191	-	protein_coding	0	0.426379	0.599285	0.311776	0.322247	0	0.119096	0	1.15876	0.0259994	0.0949714	0.0904936	0.122726	0	0.0404361	0.101897	0.253026	0.374213	0.0155581	0.43685	0.296127	0.0693263	0.0622756	0.119662	0.187582	0.108968	0.0637786	0.169284	0.53364	0.9716	0.20319	0.690567	0.590895	0.203163	0.500671	0.319448	0.669029	0.684325	0.279817	0.491942	0.352656	0.0417365	0.138859	0.247061	0.486419	0.18731	0.308855
ENSMMUG00000061999	Metazoa_SRP	misc_RNA	0	0	0	0	0	0	0	0	0	0	0	0	0	0	0	0	0	0	0	0	0	0	0	0	0	0	0	0	0	0	0	0	0	0	0	0	0	0	0	0	0	0	0	0	0	0	0
ENSMMUG00000016408	AHCTF1	protein_coding	2.22419	13.9538	20.2643	12.3383	7.01693	0.895058	5.86554	1.5912	22.8499	1.80337	0.685462	1.69374	1.98174	1.65142	0.897811	0.979763	9.97926	10.5123	3.14036	12.2101	12.2443	2.56332	0.609462	0.439155	8.72412	8.77125	9.91652	7.39924	11.2656	29.3253	7.82982	20.3548	47.8849	24.3586	46.4872	30.3911	20.0777	17.4904	19.3471	15.4091	10.3774	4.96273	11.3642	11.2854	19.8221	10.9729	23.7011
ENSMMUG00000049281	-	protein_coding	0.0250622	0.0274446	0	0.0256425	0	0.386852	0	0.0294441	0.0836815	0.0384905	0.140599	0.066985	0.317953	0.725536	0.0897947	0	0.0249726	0	0.0230328	0	0	0	0	0.496028	0	0	0	0	0.03762	0.217938	0	0	0.0323994	0.180462	0.218004	0.0363787	0	0.0361821	0.0828504	0	0	0.0411922	0.051393	0	0.115218	0.0346625	0
ENSMMUG00000053269	-	lncRNA	0	0	0	0	0	0	0	0.0999489	0.28406	0	0	0	0	0	0	0	0	0	0	0	0	0	0	0	0.171395	0.0912674	0.213675	0	0	0	0	0	0	0	0	0.123489	0	0.245643	0	0	0	0	0	0	0.488889	0	0
ENSMMUG00000022208	SCCPDH	protein_coding	3.88466	11.1217	11.8264	10.599	14.5185	10.0874	11.612	5.51695	11.6945	5.63062	3.23831	5.12882	16.5125	18.7636	5.04932	4.93935	9.35825	10.5182	4.33	10.5155	6.89526	3.3222	2.62085	1.94086	8.89488	9.53993	8.44414	8.04989	6.32291	16.7953	3.35182	8.74213	14.9246	4.6994	11.0193	8.67322	6.02539	8.28851	5.00266	5.16825	6.38171	4.75656	7.69401	9.38048	16.0479	10.1413	20.1232
ENSMMUG00000056452	-	lncRNA	0.171624	0	0	0	0.0725979	0	0.0482952	0.0403261	0	0	0	0	0	0	0	0	0	0	0.0315453	0	0	0	0	0	0	0	0	0	0	0.0596969	0	0	0.133121	0	0.418004	0	0	0	0	0	0.0325018	0	0	0	0.236701	0.0474732	0
ENSMMUG00000060928	-	protein_coding	0	0.174663	0.531002	0.979161	0.0920041	0.0248686	0.0816067	0	0.145245	0.0445383	0.10846	0.038755	0.0525587	0	0	0.0174554	0.231171	0.480784	0.266518	0.38914	0.710193	0.0445348	0	0	0.0876376	0.404445	0.418815	0.144996	0.370014	1.74005	0.626535	0.217917	0.937252	1.42691	0.8829	0.589325	0.130236	0.23027	0.143802	0.0842722	0.137299	0.154909	0.505478	0.268044	0.649943	0.36098	1.11107
ENSMMUG00000011380	CNST	protein_coding	0.963393	3.8398	5.40444	4.56611	2.58446	0.546714	2.37213	0.773974	11.0457	1.79508	1.28493	1.36319	1.33519	1.15585	0.702187	0.434906	2.99278	3.03208	1.1523	4.45292	3.46954	1.2909	0.477743	0.370531	4.09587	5.05362	4.22555	2.83342	4.59355	10.3118	2.60171	6.67655	8.93782	3.5535	9.5385	5.32626	10.1545	7.52692	9.60116	7.08122	3.62878	1.90361	3.69689	4.39712	9.07781	5.7804	9.91254
ENSMMUG00000059690	-	protein_coding	0.0907461	11.3782	10.5511	3.55141	11.7798	0.0778181	0.542642	0.453101	27.7621	0.592313	0.890901	0.66699	7.81209	0	0.108377	0.218483	19.2598	2.05153	5.83786	9.24971	6.5082	3.85554	0.139093	0.128288	7.63281	4.40517	4.41595	4.94551	25.7448	5.366	2.91357	9.1569	16.9224	2.64092	9.86694	9.61565	31.8689	5.10937	9.52461	3.42812	5.99337	0.8949	4.41953	2.62662	16.7396	1.78848	8.23656
ENSMMUG00000055490	TFB2M	protein_coding	0.477231	1.9241	2.35668	1.84215	0.596438	0.0372039	0.691815	0.0509699	1.12266	0.188785	0.0676077	0.0773041	0.104838	0.266415	0.0518138	0.113159	1.91651	1.67101	0.930336	2.3361	2.06589	0.170263	0.0265994	0.0511108	2.33079	2.11769	2.15207	1.61964	0.271346	1.30786	0.503368	0.605441	2.33691	1.24957	1.28309	1.70031	1.72754	1.34663	1.29078	1.50236	2.2115	1.46773	3.03964	2.68739	1.96127	0.600035	1.76772
ENSMMUG00000055003	-	lncRNA	0	0	0	0	0	0	0	0	0	0	0	0	0	0	0	0	0	0	0	0	0	0	0	0	0	0	0	0	0	0	0	0	0	0	0.0280452	0	0	0	0	0	0	0	0	0	0	0	0
ENSMMUG00000005777	SMYD3	protein_coding	2.41751	4.08275	4.52491	5.01293	5.49943	0.497544	5.36674	1.54001	14.8524	4.19135	1.82839	1.4933	3.50513	0.763477	1.19338	1.38398	3.86489	4.78251	1.45154	4.26982	3.97194	4.67501	1.33068	0.865802	3.18202	4.33401	3.33278	2.15957	3.82238	7.68018	2.48895	5.85925	6.33385	3.88121	4.16835	6.50353	10.0751	6.93374	7.15708	7.47783	2.59433	1.52756	2.688	3.10474	4.86545	3.84881	5.76312
ENSMMUG00000024556	U6	snRNA	0.407085	0.445783	6.95696	0.416511	1.722	0	0.572772	0	2.71848	0	0.76125	0	0	0	0	0	1.21689	1.63611	0.748243	1.26058	2.84836	0.416768	0	0	1.2302	4.36719	2.55611	2.44244	9.16593	13.4519	14.1696	20.1019	14.2091	14.1677	9.91489	12.4089	5.85016	5.28936	3.36435	3.54888	1.54186	0.334542	0.834775	3.96067	1.87149	1.12605	3.71347
ENSMMUG00000017324	KIF26B	protein_coding	0.935832	0.233229	0.0945403	0.462241	3.26245	1.27295	3.91384	4.67078	21.8729	17.8417	9.03969	5.52861	4.3162	0.78133	2.60529	2.54061	0.308685	0.188059	0.100834	0.21984	0.158055	5.49085	1.46409	0.839414	0.0715142	0.180019	0.0972603	0.103261	6.69434	4.46742	5.83308	2.34174	3.54598	1.15407	3.6042	2.20153	0.510123	0.614962	0.522723	0.787706	0.0550011	0.180333	0.0794082	0.131866	0.749191	0.723029	0.624066
ENSMMUG00000050220	-	processed_pseudogene	1.27363	0	0	0	0	2.18437	0	1.49631	5.1031	4.69449	1.90535	3.40409	2.30828	4.69265	1.21687	0	0	0	0	0.262928	0	0	0.312349	0.720214	0	0	0	0	0	0	0	0	0.658598	0.305695	0	0	0	0	0.421035	0	0	0	0	0	0	0	0
ENSMMUG00000052401	Metazoa_SRP	misc_RNA	2.06018	0	0	0.301126	0.311239	0	3.31279	0	1.96538	8.13606	4.95327	6.68628	3.7338	0	0.702988	0.708595	0	0	0	0	0	1.50656	1.80445	2.08035	0	0	0	0	0	2.5593	1.76624	0.631874	1.52189	0	1.53604	0	0	0.424896	0	0	0	0	0.30176	0	0.338259	0.407051	0.536948
ENSMMUG00000059892	Metazoa_SRP	misc_RNA	0	0.644578	0	0	0	1.00953	0	1.03731	0.982692	1.80801	2.75182	2.75318	1.6002	3.09823	0.351494	0.354298	0	0	0	0	0	1.50656	0	1.24821	0	0	0	0	2.65069	1.53558	1.413	0	1.14142	0	3.07208	0.854408	0	0	0	0	0	0	0	0	0	0.407051	0.536948
ENSMMUG00000027317	U1	snRNA	0.796795	0	0	0	0	0	0	0.312035	0.44341	0	0	0.354939	0	0	0	0	0	1.60119	0	0	0.61946	0	0.325681	2.62834	0	0.284932	0	0.26559	0	0	0	1.14046	0	0	0	0.385526	0	0.766885	0	0	0	0	0	0	0	1.10201	0.484563
ENSMMUG00000011424	EFCAB2	protein_coding	2.63906	9.0869	21.0226	9.52018	3.53891	0	6.35452	0.671237	5.5868	0.543195	0.559645	0.763529	0.838248	0.358009	1.16974	0.294768	9.1088	8.47435	2.52538	11.0927	14.436	1.42055	0.23353	0.384624	6.16638	8.31839	9.56666	5.08752	5.55414	17.3182	6.82492	9.69636	10.3757	6.824	17.1814	6.87155	5.32718	4.55628	9.08395	3.67634	1.67452	1.11793	3.29165	3.83821	4.53406	2.93504	14.4939
ENSMMUG00000057396	Metazoa_SRP	misc_RNA	1.45194	0.317992	0.354474	0.891333	0.307089	2.49018	0.408578	1.02348	1.45438	3.12184	3.25815	1.1642	2.10515	0	0.346807	0.349574	0	0.875318	0.266874	0.299737	0	1.18918	1.42431	0.410522	0	0.623052	3.28205	0.580757	0.435891	0.505036	1.04562	0.623449	0	0	1.01037	0	0	0	0.95996	0.843845	0.274965	0.71592	0	0	0	1.20487	1.58937
ENSMMUG00000036930	U6	snRNA	0	0.458642	1.53378	0.428526	0	0	0	0	1.39845	0	0	0	0	0	0	0	0	1.26248	0	0.432314	0	0	0	0	0	0	0	0.83763	0	4.3705	0	0	0.541443	0	1.45727	0	0	0.604659	0.692279	1.21708	0	0	0	0.407492	0	0.579264	0.764118
ENSMMUG00000060683	mml-mir-7180	miRNA	3.00401	2.46718	6.41719	5.37874	1.58839	0	0	0	6.2689	0	1.40438	0	1.36109	0	0	0	12.7214	5.28209	2.76076	3.10073	5.25473	0.768865	0	0	2.26951	2.41701	3.77247	1.50196	5.63652	11.7551	15.3237	24.1855	0	3.60509	9.14563	3.27032	2.69814	2.16843	4.96531	0	0	0	2.31002	4.38405	0	0	2.74029
ENSMMUG00000051140	U6	snRNA	0	2.6747	0.993851	0.833022	0	0	0	0	2.03886	0	0	0	0	0	0	0	2.83941	3.27222	0	1.68077	4.27254	0	0	0	2.4604	0.873437	0.511223	0.407073	0	0.707994	0.488606	4.36997	0	0	2.83282	0.590899	0	2.93853	6.72869	2.9574	0	0.334542	0.834775	0.396067	0	0.563023	2.22808
ENSMMUG00000053368	-	protein_coding	0.536883	0.618862	1.32798	1.89369	0.95623	1.21157	1.19273	2.83838	1.60393	4.4265	4.88776	4.00276	3.68726	1.97069	1.88983	2.84036	1.32333	0.823361	0.740113	1.02084	0.807327	1.48985	1.87105	0.838887	1.08163	2.51605	3.12272	1.21501	4.47484	1.99033	1.72969	2.33566	0.858441	0.576487	1.4256	0.92286	1.47203	2.08051	1.68141	2.4018	0.0802687	0.406377	0.188319	0.357398	0.811909	2.2667	2.57763
ENSMMUG00000036090	U6	snRNA	0	0	0	0	0	0	0	0	0	0	0	0.5821	0	0	0	0	0	0	0	0	0	0	0	0	0	0	0	0	0	0	0	0	0	0	0	0	0	0	0	0	0	0	0	0	0	0	0
ENSMMUG00000050136	Metazoa_SRP	misc_RNA	0	0	0	0	0	0	0	0	0	0	0.550364	0	0	0	0	0	0	0	0	0	0	0	0	0	0	0	0	0.294302	0	0	0.353249	0	0	0	0	0	0	0	0	0	0	0	0	0	0	0	0
ENSMMUG00000060516	-	lncRNA	0	0.0881678	0	0	0.0212862	0	0	0	0	0	0	0	0	0	0	0	0	0.0202245	0	0	0	0	0	0	0	0	0	0	0	0	0	0	0.104085	0.169093	0	0	0	0	0	0	0	0	0	0	0.138805	0.0556779	0
ENSMMUG00000021098	HNRNPU	protein_coding	14.1632	42.4249	59.937	43.3056	27.6576	32.4652	24.1177	14.639	65.2023	26.6973	25.6591	14.3954	40.6853	90.4852	10.5676	11.3466	35.5581	36.5861	13.6776	44.4973	31.4545	14.8574	24.1025	14.6342	29.4165	45.7506	35.662	36.6464	64.7313	111.601	33.0753	81.0514	63.4479	34.8834	73.7206	47.6316	64.0275	62.6377	51.7663	43.2378	27.8877	16.0245	26.9175	28.3567	51.2905	45.5521	69.317
ENSMMUG00000031175	COX20	protein_coding	2.17543	17.1629	27.008	17.0223	4.33968	2.79827	3.13042	2.14918	13.7432	4.82171	4.57658	2.41165	6.9445	6.18064	1.41715	1.51773	14.0405	14.63	5.61161	17.7597	13.6935	1.67038	1.87941	2.09688	16.4104	22.0119	15.8949	15.9692	10.0562	63.5451	14.984	39.2221	23.5531	13.9436	21.4604	19.8434	25.3123	23.2694	19.0821	16.0556	8.91841	5.30236	10.2907	11.184	20.2863	14.1548	27.0156
ENSMMUG00000048085	-	lncRNA	0	0	0	0	0	0	0	0	0	0	0	0	0	0	0	0	0	0	0	0	0	0	0	0	0	0	0	0	0.328011	0	0.0874262	0	0	0	0.126719	0	0.261692	0	0	0	0	0	0.149366	0	0.0837162	0	0.13289
ENSMMUG00000062648	-	protein_coding	0.212479	0.930708	0.103748	0.521756	0.359519	0.0728833	0.298959	0.199703	0.141891	0	0	0	0.154036	0	0.0507523	0.102314	0.762188	0.683175	0.117164	0.921144	0.346898	0.0435065	0	0	0.256842	0.410303	0.426933	0.38245	0.382733	0.369538	0.102011	0.821128	0.16481	0	0	0.185052	0.6107	1.22702	0.772651	0.679192	0.362149	0.314306	0.392141	0.372109	0.341889	0.0587741	0
ENSMMUG00000054073	-	pseudogene	0	0.0873604	0	0.0816239	0	0	0	0	0	0.367563	0	0.63967	0.578339	0	0	0	0	0.0801573	0	0	0	0.0816743	0	0	0	0	0	0	0.479001	0.138746	0.0957525	0	0	0	0	0	0	0	0	0	0	0	0	0	0	0	0
ENSMMUG00000022310	DESI2	protein_coding	0.300094	6.28032	9.02239	5.53814	1.61028	0.552808	1.06341	0.509257	4.11933	0.85349	0.415687	0.564425	0.443162	0.819028	0.199111	0.227459	4.41887	6.14219	1.55262	5.34617	4.13469	0.591706	0.204434	0.0785638	11.2184	9.0143	9.40759	6.8575	6.33982	28.2609	7.33719	12.1938	7.57219	4.06826	11.4276	6.56623	7.36738	8.64883	6.68714	5.78138	2.43111	1.72632	2.4843	3.23331	4.79034	4.88835	6.85386
ENSMMUG00000000021	CATSPERE	protein_coding	0.174698	1.35508	2.16807	1.75764	1.0469	0.0749051	1.10611	0.102621	0.680528	0.0894339	0.0816716	0.194552	0.290232	0.0766274	0.121707	0.105152	0.710801	1.5359	0.294346	1.45761	1.49399	0.13414	0.0535545	0.102905	1.17319	1.68674	0.9324	0.931695	0.85226	4.07641	1.01347	2.4067	3.21826	1.85195	3.44446	2.15544	0.967614	1.5553	1.25129	1.41722	1.30958	0.885329	2.17929	1.99714	0.987191	1.04701	1.35457
ENSMMUG00000062093	-	protein_coding	0.143126	0.0696587	0.174713	0.14644	0.201811	0.0272747	0.156629	0.093417	0.159297	0.0732711	0.0297385	0.0637568	0.691726	0	0.0759709	0.0765769	0.0950764	0.079894	0	0.13132	0.445088	0.0814059	0.0585013	0.022482	0.144175	0.221787	0.199711	0.0477073	0.143228	1.16164	0.362664	0.682857	0.986815	0.515295	1.10665	0.415506	0.285673	0.252548	0.236573	0.161745	0.0903499	0.065345	0.179359	0.263032	0.164498	0.241942	0.406191
ENSMMUG00000000016	ADSS2	protein_coding	2.9528	3.34564	6.063	3.87688	5.30667	0.819651	5.37939	1.56409	9.6883	1.99222	1.37246	1.16329	2.75311	0.898391	1.12114	1.99306	2.94224	3.24128	0.972541	2.99503	3.742	2.86577	1.5697	0.699753	1.59897	1.73952	2.57214	1.6385	4.6117	22.4119	4.95767	9.08789	16.4606	6.98486	24.6754	9.61276	14.2572	11.3596	11.4823	8.85343	3.44245	2.08997	5.00505	4.71617	12.8491	7.55404	18.7772
ENSMMUG00000000015	C1H1orf100	protein_coding	0	0	0	0.100375	0	0	0.138033	0	0	0	0	0	0	0	0.702988	0	0	0	0	0	0.114405	0	0	0	0	0.315736	0.2464	0.0981008	0	0.17062	0.11775	0.210625	0.253649	0	0.341343	0.712007	0.17623	0	0.486466	0.427624	0.464468	0	0.201173	0.190897	0.676517	0	0.715931
ENSMMUG00000058747	-	lncRNA	0	0.014663	0	0.0137002	0	0.0229651	0	0.0157313	0.0223545	0	0.0250396	0	0.0728035	0.0704793	0	0.0161193	0.0133423	0.013454	0	0.0276426	0	0	0	0	0	0.0143649	0	0	0	0.0698635	0.0321432	0	0.155792	0	0.0698845	0.0194363	0.192428	0.115988	0.199193	0.0583662	0.202864	0.088032	0.192206	0.104222	0.292402	0.148155	0.390868
ENSMMUG00000059503	Metazoa_SRP	misc_RNA	0	0	0	0	0	0	0	0	0	0	0	0	0	0	0	0	0	0	0	0	0	0	0	0	0	0	0	0	0	0	0	0	0	0	0	0	0	0	0.23076	0.202847	0	0	0	0	0	0	0
ENSMMUG00000053405	Metazoa_SRP	misc_RNA	0	0	0	0	0	0.638508	0	0	0	0	0	0	0.674728	0	0	0	0	0	0	0	0	0	0.45651	0.52631	0	0	0	0	0	0	0	0	0	0	0	0	0	0	0	0	0	0	0	0	0	0	0
ENSMMUG00000058339	-	lncRNA	0	0	0	0	0.0256335	0	0	0	0	0	0.0453277	0	0	0	0.0289488	0	0	0	0	0	0.0282669	0	0.0297227	0	0	0.0260038	0	0.0242386	0	0.0421566	0	0	0	0	0	0	0	0	0	0	0	0	0	0	0	0	0
ENSMMUG00000048772	-	lncRNA	0	0	0	0	0	0	0	0	0	0.188308	0	0.0409641	0.0555547	0.0806718	0	0	0	0	0	0	0	0.0627645	0	0.0433345	0	0	0	0	0	0	0	0	0	0	0	0	0	0	0	0	0	0	0.377147	0	0	0	0
ENSMMUG00000039543	Metazoa_SRP	misc_RNA	0	0	0	0	0	0	0	0	0	0	0	0	0	0	0	0	0	0	0	0	0	0	0	0	0	0	0	0	0	0	0	0	0	0	0	0	0	0	0	0	0	0	0	0	0	0	0
ENSMMUG00000053438	-	lncRNA	0	0	0	0	0	0	0	0	0.701472	0.0537753	0.0654773	0.18717	0	0	0	0	0	0	0	0	0	0	0	0	0	0	0	0	0	0	0	0	0	0	0	0	0	0	0	0	0	0	0	0	0	0	0
ENSMMUG00000047935	-	lncRNA	0.0725818	0	0	0	0	0	0	0	0.40896	0.0278677	0	0.0242491	0	0	0	0	0	0	0	0	0	0.278655	0	0	0	0	0	0	0	0.0631163	0.0653374	0.116872	0.0117288	0	0.0473514	0.0263388	0.0651914	0	0.11997	0.039547	0	0	0	0	0.0729923	0	0.0827622
ENSMMUG00000015664	ZBTB18	protein_coding	7.84545	4.37011	5.20362	4.92994	6.83397	0.291666	7.14638	1.21208	118.694	17.9168	6.74188	5.95433	3.41087	0.626582	1.97686	1.80155	3.8861	4.88693	1.81296	4.72777	3.71515	15.1355	2.12701	1.12194	12.848	14.5465	10.9487	12.7995	5.34369	9.32647	3.48358	6.23124	7.12304	3.0069	13.0965	4.55847	16.4353	14.8291	12.8928	11.6627	2.01822	1.55594	2.18536	1.96343	6.35877	4.56295	6.94986
ENSMMUG00000063991	-	protein_coding	0	0	0	0	0	0.0945638	0.038789	0.0971655	0	0	0	0	0.0499641	0	0	0	0	0	0	0	0	0	0.0676097	0.0389736	0	0	0	0	0	0	0	0	0	0	0	0	0	0.119401	0	0	0	0	0	0	0	0	0
ENSMMUG00000058567	-	lncRNA	0	0	0	0	0	0	0	0.0432577	0	0	0	0	0	0	0	0	0	0	0	0	0	0	0	0	0	0	0	0	0	0	0	0	0	0	0	0	0	0	0	0	0	0	0	0	0	0	0
ENSMMUG00000055600	-	lncRNA	0	0	0	0	0	0.251745	0.103263	0.129336	0	0	0	0	0	0	0	0	0	0	0	0	0	0.0375688	0	0.0518772	0	0	0	0	0	0	0	0	0	0	0	0.0532655	0	0	0	0	0	0	0	0	0	0	0
ENSMMUG00000058282	-	lncRNA	0.0363287	0	0	0	0.230509	0	0	0.0213402	0	0	0	0	0.164602	0	0	0.0218666	0	0	0	0	0	0.185964	0	0	0	0	0	0	0	0	0	0	0	0	0	0	0	0	0	0	0	0	0	0	0	0	0
ENSMMUG00000049847	-	protein_coding	0.03217	0	0	0	0.0340202	0.0551738	0.0905268	0	0	0.14822	0.120316	0.0859823	0	0.423318	0.0384203	0	0	0	0	0	0	0.0329351	0	0	0	0	0	0	0	0	0	0	0	0	0	0	0	0	0	0	0	0	0	0	0	0	0
ENSMMUG00000019995	AKT3	protein_coding	9.90235	7.83685	10.747	8.24087	13.3756	1.74916	14.2025	2.33493	36.1632	6.06446	3.56982	4.17034	4.70784	2.91347	1.97799	2.52893	6.66192	7.58481	1.44999	7.41396	6.89203	8.06746	2.80045	1.51574	4.49572	3.6751	3.59053	2.70214	8.87134	36.3086	6.03683	18.0784	9.99541	3.45214	14.2245	6.66804	15.7369	13.5031	13.8317	9.09367	1.98919	1.28227	1.86793	2.60364	8.38546	9.31923	15.5215
ENSMMUG00000064143	Metazoa_SRP	misc_RNA	1.86146	6.52291	3.18117	3.04729	9.05519	8.3006	2.09527	6.12336	6.83685	8.57648	5.56949	4.97521	12.1451	0.979783	1.7785	6.72257	2.59672	2.24441	0	3.84279	4.77566	10.6721	5.47812	5.78941	2.62513	1.19818	3.74023	1.48912	7.82368	9.71222	1.78738	4.79576	1.44385	0.446785	3.23838	2.16158	14.0441	9.13707	14.7686	8.1139	1.7626	1.52974	1.52685	1.08664	2.99518	6.69372	4.0753
ENSMMUG00000019994	SDCCAG8	protein_coding	0.781915	4.05216	5.21618	4.83069	4.80332	0.743125	3.33552	2.42821	6.87615	2.96009	1.38768	1.83695	2.38292	1.91364	1.029	0.97126	3.99484	3.46785	0.979492	4.16911	3.60088	1.89676	1.11758	0.661829	3.31613	4.86737	3.67132	2.80385	5.12842	9.05149	3.59857	6.16962	4.04331	3.05419	3.96825	4.20737	9.63536	8.99481	9.12928	7.54019	3.07001	2.03005	2.98213	3.70684	2.71891	2.72769	4.12515
ENSMMUG00000051554	Metazoa_SRP	misc_RNA	0.294312	1.93374	1.43705	0.903378	5.6023	2.01906	0.414099	4.14923	3.93077	6.32805	2.20145	3.14649	8.001	0.774558	2.46046	2.12579	0.879778	1.18286	0	0.911364	0.343214	3.61574	1.80445	0.832139	1.77881	3.47309	1.4784	2.06012	3.97603	3.07116	1.05975	3.79124	2.28284	0.706403	2.56007	1.28161	8.45902	4.24896	3.89173	5.98674	1.95076	0.48373	1.81056	3.1498	0	1.22115	0.536948
ENSMMUG00000042187	MIR4677	miRNA	0.544477	1.78871	7.97565	2.22833	5.18213	0	0.766083	0	7.27192	0	0	0	0	0	0	0.65545	3.79771	4.37659	0.500388	2.24803	2.53979	0	0	0	1.09693	9.92989	8.88888	2.17784	2.45189	20.8327	6.53511	15.1966	14.7814	3.92053	8.52503	2.37098	9.78074	14.9351	9.89959	6.32884	3.09335	4.4745	3.90779	4.23791	2.50311	3.76522	16.887
ENSMMUG00000019914	CEP170	protein_coding	3.54176	11.9873	12.3968	10.4919	13.3477	0.83748	10.6536	2.26568	29.8431	3.63578	1.32924	1.9329	4.6714	0.992296	2.12602	2.03137	9.14609	9.93692	2.17566	10.0104	7.27301	3.39186	0.666983	0.594199	4.28997	5.82205	4.40898	3.39331	6.1329	14.0933	5.3045	8.75854	4.72247	2.09926	4.93574	2.9249	21.9071	19.6587	16.6532	15.6268	4.7993	1.80834	2.80752	4.75089	5.56958	4.40264	6.82252
ENSMMUG00000059561	-	protein_coding	0	0	0	0	0.0539384	0	0	0	0	0	0	0	0.277318	0.134233	0	0	0	0	0	0	0.0594798	0	0	0	0	0	0	0	0	0	0	0	0	0	0	0	0	0	0	0	0	0	0	0	0	0	0
ENSMMUG00000062759	-	protein_coding	0	0	0	0	0	0	0	0	0.196538	0	0	0	0	0	0	0	0	0	0	0	0	0	0	0	0	0	0	0	0	0	0	0	0	0	0	0	0	0	0	0	0	0	0	0	0	0	0
ENSMMUG00000061742	Metazoa_SRP	misc_RNA	0	0	0	0	0	0.638508	0	0	0	0	0.696186	0	0	0	0	0	0	0	0	0	0	0	0	0	0	0	0	0	0	0	0	0	0	0	0	0	0	0	0	0	0	0	0	0	0	0	0
ENSMMUG00000053960	Metazoa_SRP	misc_RNA	0	0	0	0	0	0	0	0	0	0	0	0	0	0.774558	0	0	0	0	0	0	0	0	0	0	0	0	0	0	0	0	0	0	0	0	0	0	0	0	0	0	0	0	0	0	0	0	0
ENSMMUG00000004265	PLD5	protein_coding	0.34631	0.0210684	0	0.0984246	0.935917	0.593947	1.6242	1.06235	13.8758	3.01389	0.791512	1.13129	1.67371	0.506337	0.666348	0.972753	0.0766826	0.0773249	0.0353631	0	0	1.00455	0.54261	0.0815967	0.135663	0.0825599	0.0724834	0.0384777	0.95303	3.11186	0.738952	1.23919	0.348207	0.554139	0.100413	0.502682	0.0345609	0.111103	0.0636016	0.167725	0	0	0	0	0.176899	0.159656	0.386109
ENSMMUG00000056808	-	pseudogene	0	0	0	0.0505291	0.104452	0.3388	0.34743	0.290101	5.19423	4.47494	1.38527	1.38595	0.984553	1.55965	0	0	0	0.0496212	0	0.0509758	0	0.101121	0.0605575	0.139633	0	0	0	0	0.370655	0.687123	0.237101	0.84823	0.0638437	0.237069	0.257749	0	0.0887142	0	0	0	0	0	0	0	0.05676	0	0.2703
ENSMMUG00000035346	U6	snRNA	0	0	0	0	0	0	0	0	0	0	0	0	0	0	0	0	0	0	0	0	0	0	0	0	0	0	0	0	0	0	0	0	0	0	0	0	0	0	0	0	0	0	0	0	0	0	0
ENSMMUG00000053723	-	protein_coding	0.294312	0.10743	0	0	0.518732	0	0.414099	0.115256	0.982692	0.301336	0	0	0.1778	0	0	0	0	0	0	0	0	0.100437	0.120297	0	0	0	0.1232	0.0981008	0	0	0	0.421249	0	0	0	0	0.17623	0.141632	0.324311	0.285083	0	0	0	0	0.112753	0	0
ENSMMUG00000060345	BECN2	protein_coding	0	0	0	0	0	0	0	0	0	0	0	0	0	0	0	0.12138	0	0	0	0	0	0.0688181	0	0	0	0	0	0	0	0	0	0	0	0	0	0	0	0	0	0	0	0	0	0	0	0	0
ENSMMUG00000008761	EXO1	protein_coding	0	0	0.0235583	0.03291	0.0476213	0.0551657	0.0181027	0.0226734	0	0	0	0	0.023318	0.118512	0.00768292	0.0154884	0.00641004	0.0193912	0	0.0199205	0.0150039	0	0	0	0.0194405	0	0.0484721	0	0.0675949	0.279705	0.293409	0.110492	0.00831637	0	0.0335747	0.0280134	0.265789	0.538666	0.531657	0.654288	0.0304569	0.00528666	0.0527668	0.0375535	0.266171	0.133459	0.75114
ENSMMUG00000008763	WDR64	protein_coding	0	0.375809	0.467261	0.418657	0.153545	0	0.0557151	0.0155072	0.242397	0	0	0	0	0	0	0	0.223588	0.38461	0.109176	0.286113	0.384816	0	0	0	0.106369	0.311526	0.16576	0.0527961	0.138692	0.89529	0.190112	0.680126	0.528974	0.396014	0.574076	0.593943	0.711327	0.743181	0.95996	0.575349	0.62492	0.0867782	0.433071	0.565055	0.439941	0.146045	0.577951
ENSMMUG00000005669	OPN3	protein_coding	1.30399	1.23572	1.28566	0.84669	1.75025	0.645124	0.740944	1.09006	0.711702	0.654716	0.0937868	0.435653	0.545376	0.46197	0.359386	0.633942	0.699635	1.38579	0.483968	1.42362	0.818814	2.20788	0.307494	0.460862	0.505207	0.484237	0.188949	0.702124	0.715192	3.7507	1.44472	0.861415	1.75057	1.38434	2.09404	1.85638	1.3514	1.33951	1.74086	1.82177	1.25847	0.721278	1.23414	1.61026	0.662886	1.00579	1.60126
ENSMMUG00000005668	KMO	protein_coding	0.0190376	0.187626	0.580977	0.233741	0.201326	0	0.107144	0	0.0317829	0	0	0	0	0	0	0	0.227635	0.229541	0.0174961	0.0786025	0.111005	0	0	0	0	0.0204235	0.239077	0.0380741	1.00019	2.15214	1.7823	2.12539	16.6371	22.4814	3.08014	15.3368	5.77953	5.60684	5.44383	5.28325	20.7846	14.1588	28.3813	21.2822	1.13778	0.236972	2.25762
ENSMMUG00000005667	FH	protein_coding	1.82932	27.7112	35.406	27.4928	3.82608	0.348602	4.23258	0.596988	10.7229	1.09257	0.342083	0.244466	1.47351	0.374448	0.534047	0.562776	23.0885	28.9186	11.5255	35.1209	23.5846	1.39422	0.19939	0.229877	21.6212	18.709	16.4128	25.8536	2.47134	5.86812	2.4884	4.10202	19.2605	15.2211	12.3055	13.6307	5.98802	5.95687	5.64419	5.93606	45.3634	20.1112	54.5596	35.0226	19.7399	5.79102	14.9443
[truncated: 34,744 more rows]
[truncated: 9 more columns]

## Sheet: Supplementary Table 5
Supplementary Table 5. Changes of differentially expressed genes (DEGs) among multiple organs in rhesus macaque post SARS-CoV-2 infection.
[truncated: 18,731 more rows]

## Sheet: Supplementary Table 6
Supplementary Table 6. Changes of IFN-stimulated genes (ISGs) among multiple organs in rhesus macaque post SARS-CoV-2 infection.
[truncated: 573 more rows]

[truncated: 2 more sheets: Supplementary Table 7, Supplementary Table 8]
